# Supplementary material
Source: PubMed Central journal article supplement (PMC2906237)
Supplement: NIHMS206558-supplement-4.pdf [file NIHMS206558-supplement-4.pdf]

## Wild type F1/F10 (villus/crypt)

| Probe set    | Gene symbol   | Gene name                                                                                                        | Fold change | p value  |
|--------------|---------------|------------------------------------------------------------------------------------------------------------------|-------------|----------|
| 1450709_at   | Defcr5        | defensin related<br>cryptdin 5                                                                                   | 0.009       | < 1e-07  |
| 1429378_x_at | AY761184      | cDNA sequence<br>AY761184                                                                                        | 0.038       | < 1e-07  |
| 1418165_at   | Itln1         | intelectin 1<br>(galactofuranos<br>e binding)                                                                    | 0.043       | 1.00E-07 |
| 1418550_x_at | Defcr-rs1     | defensin related<br>sequence<br>cryptdin peptide<br>(paneth cells)                                               | 0.044       | < 1e-07  |
| 1439426_x_at | Lyz2          | lysozyme 2                                                                                                       | 0.059       | < 1e-07  |
| 1435945_a_at | Kcnn4         | potassium<br>intermediate/sm<br>all conductance<br>calcium-<br>activated<br>channel,<br>subfamily N,<br>member 4 | 0.061       | 1.00E-07 |
| 1420731_a_at | Csrp2         | cysteine and<br>glycine-rich<br>protein 2                                                                        | 0.065       | 1.20E-06 |
| 1416698_a_at | Cks1b         | CDC28 protein<br>kinase 1b                                                                                       | 0.065       | < 1e-07  |
| 1452661_at   | Tfrc          | transferrin<br>receptor                                                                                          | 0.066       | 2.00E-07 |
| 1417622_at   | Slc12a2       | solute carrier<br>family 12,<br>member 2                                                                         | 0.066       | 3.00E-07 |
| 1450682_at   | Fabp6         | fatty acid<br>binding protein<br>6, ileal<br>(gastrotropin)                                                      | 0.067       | < 1e-07  |
| 1415849_s_at | Stmn1         | stathmin 1                                                                                                       | 0.069       | < 1e-07  |
| 1418287_a_at | Dmbt1         | deleted in<br>malignant brain<br>tumors 1                                                                        | 0.070       | 3.00E-07 |
| 1440922_at   | 9130208D14Rik | RIKEN cDNA<br>9130208D14<br>gene                                                                                 | 0.071       | 1.26E-05 |
| 1439377_x_at | Cdc20         | cell division<br>cycle 20<br>homolog (S.<br>cerevisiae)                                                          | 0.072       | 7.00E-07 |

|              |         |                                                                                |       |          |
|--------------|---------|--------------------------------------------------------------------------------|-------|----------|
| 1427126_at   | Hspa1b  | heat shock protein 1B                                                          | 0.080 | 3.00E-07 |
| 1450631_x_at | Defcr6  | defensin related cryptdin 6                                                    | 0.081 | < 1e-07  |
| 1418094_s_at | Car4    | carbonic anhydrase 4                                                           | 0.082 | 6.00E-07 |
| 1416039_x_at | Cyr61   | cysteine rich protein 61                                                       | 0.082 | 1.00E-07 |
| 1436996_x_at | Lyz1    | lysozyme 1                                                                     | 0.084 | < 1e-07  |
| 1451260_at   | Aldh1b1 | aldehyde dehydrogenase 1 family, member B1                                     | 0.090 | 5.00E-07 |
| 1455035_s_at | Nol5a   | nucleolar protein 5A                                                           | 0.093 | 1.40E-06 |
| 1438133_a_at | Cyr61   | cysteine rich protein 61                                                       | 0.096 | 1.00E-07 |
| 1452388_at   | Hspa1a  | heat shock protein 1A                                                          | 0.105 | 2.00E-07 |
| 1454694_a_at | Top2a   | topoisomerase (DNA) II alpha                                                   | 0.106 | 1.00E-07 |
| 1427127_x_at | Hspa1b  | heat shock protein 1B                                                          | 0.107 | 5.00E-07 |
| 1426351_at   | Hspd1   | heat shock protein 1 (chaperonin)                                              | 0.108 | 1.00E-07 |
| 1436808_x_at | Mcm5    | minichromosome maintenance deficient 5, cell division cycle 46 (S. cerevisiae) | 0.108 | < 1e-07  |
| 1437671_x_at | Prss23  | protease, serine, 23                                                           | 0.111 | 6.00E-07 |
| 1438178_x_at | Atad3a  | ATPase family, AAA domain containing 3A                                        | 0.111 | 2.00E-07 |
| 1439436_x_at | Incnp   | inner centromere protein                                                       | 0.114 | < 1e-07  |
| 1423846_x_at | Tuba1b  | tubulin, alpha 1B                                                              | 0.121 | < 1e-07  |
| 1440832_at   | Ang4    | angiogenin, ribonuclease A family, member 4                                    | 0.122 | 1.80E-06 |
| 1417457_at   | Cks2    | CDC28 protein kinase regulatory subunit 2                                      | 0.123 | 1.00E-07 |

|              |             |                                                                                |       |          |
|--------------|-------------|--------------------------------------------------------------------------------|-------|----------|
| 1415897_a_at | Mgst1       | microsomal glutathione S-transferase 1                                         | 0.124 | 4.00E-07 |
| 1455821_x_at | C1qbp       | complement component 1, q subcomponent binding protein                         | 0.125 | 3.00E-07 |
| 1454991_at   | Slc7a1      | solute carrier family 7 (cationic amino acid transporter, y+ system), member 1 | 0.127 | 1.00E-07 |
| 1436707_x_at | Ncaph       | non-SMC condensin I complex, subunit H                                         | 0.127 | 9.00E-07 |
| 1453572_a_at | Plp2        | proteolipid protein 2                                                          | 0.128 | 8.00E-07 |
| 1416746_at   | H2afx       | H2A histone family, member X                                                   | 0.130 | 7.30E-06 |
| 1433674_a_at | Snord22     | small nucleolar RNA, C/D box 22                                                | 0.130 | < 1e-07  |
| 1450668_s_at | Hspe1       | heat shock protein 1 (chaperonin 10)                                           | 0.130 | 7.00E-07 |
| 1456541_x_at | Atad3a      | ATPase family, AAA domain containing 3A                                        | 0.131 | 6.00E-07 |
| 1420579_s_at | Cftr        | cystic fibrosis transmembrane conductance regulator homolog                    | 0.135 | 2.20E-06 |
| 1425993_a_at | Hsph1       | heat shock 105kDa/110kDa protein 1                                             | 0.135 | 1.00E-07 |
| 1437716_x_at | Kif22       | kinesin family member 22                                                       | 0.139 | 3.00E-07 |
| 1417822_at   | D17H6S56E-5 | DNA segment, Chr 17, human D6S56E 5                                            | 0.140 | 4.70E-06 |
| 1436847_s_at | Cdca8       | cell division cycle associated 8                                               | 0.146 | 2.03E-05 |

|              |               |                                                                                     |       |           |
|--------------|---------------|-------------------------------------------------------------------------------------|-------|-----------|
| 1439399_a_at | Snhg1         | small nucleolar RNA host gene (non-protein coding) 1                                | 0.146 | 1.00E-07  |
| 1416453_x_at | Rps12         | ribosomal protein S12                                                               | 0.146 | 1.20E-06  |
| 1452318_a_at | Hspa1b        | heat shock protein 1B                                                               | 0.147 | 2.00E-07  |
| 1457434_s_at | Ptpla         | protein tyrosine phosphatase-like (proline instead of catalytic arginine), member a | 0.149 | 2.30E-06  |
| 1439740_s_at | Uck2          | uridine-cytidine kinase 2                                                           | 0.152 | 6.97E-05  |
| 1455540_at   | Cps1          | carbamoyl-phosphate synthetase 1                                                    | 0.152 | 1.01E-05  |
| 1452614_at   | Bcl2l15       | BCL2-like 15                                                                        | 0.153 | 2.00E-07  |
| 1438938_x_at | Phb2          | prohibitin 2                                                                        | 0.154 | 2.80E-06  |
| 1451077_at   | Rpl5          | ribosomal protein L5                                                                | 0.155 | 1.09E-05  |
| 1428106_at   | 1300001I01Rik | RIKEN cDNA 1300001I01 gene                                                          | 0.155 | 2.70E-06  |
| 1442710_at   | NA            | NA                                                                                  | 0.155 | 5.00E-07  |
| 1419153_at   | 2810417H13Rik | RIKEN cDNA 2810417H13 gene                                                          | 0.156 | 1.40E-06  |
| 1420142_s_at | Pa2g4         | proliferation-associated 2G4                                                        | 0.156 | 6.80E-06  |
| 1455287_at   | Cdk6          | cyclin-dependent kinase 6                                                           | 0.158 | 3.90E-06  |
| 1433933_s_at | Slco2b1       | solute carrier organic anion transporter family, member 2b1                         | 0.159 | 2.26E-05  |
| 1421424_a_at | Anpep         | alanyl (membrane) aminopeptidase                                                    | 0.159 | 0.0007021 |
| 1416606_s_at | Nola2         | nucleolar protein family A, member 2                                                | 0.160 | 1.70E-06  |

|              |                    |                                                                  |       |          |
|--------------|--------------------|------------------------------------------------------------------|-------|----------|
| 1416345_at   | Timm8a1            | translocase of inner mitochondrial membrane 8 homolog a1 (yeast) | 0.160 | 2.23E-05 |
| 1455897_x_at | Hmgn1              | high mobility group nucleosomal binding domain 1                 | 0.161 | 2.00E-07 |
| 1448595_a_at | Bex1               | brain expressed gene 1                                           | 0.161 | 3.70E-05 |
| 1437610_x_at | OTTMUSG00000016200 | predicted gene, OTTMUSG00000016200                               | 0.162 | 4.00E-07 |
| 1437313_x_at | Hmgb2              | high mobility group box 2                                        | 0.162 | 2.00E-07 |
| 1425952_a_at | Gcg                | glucagon                                                         | 0.164 | 1.09E-05 |
| 1426741_a_at | Fastkd2            | FAST kinase domains 2                                            | 0.164 | 5.00E-07 |
| 1448780_at   | Slc12a2            | solute carrier family 12, member 2                               | 0.166 | 9.98E-05 |
| 1448274_at   | C1qbp              | complement component 1, q subcomponent binding protein           | 0.166 | 5.60E-06 |
| 1455319_x_at | OTTMUSG00000022847 | predicted gene, OTTMUSG00000022847                               | 0.167 | 1.40E-06 |
| 1417458_s_at | Cks2               | CDC28 protein kinase regulatory subunit 2                        | 0.168 | 7.00E-07 |
| 1422460_at   | Mad2l1             | MAD2 (mitotic arrest deficient, homolog)-like 1 (yeast)          | 0.169 | 1.59E-05 |
| 1450435_at   | L1cam              | L1 cell adhesion molecule                                        | 0.169 | 1.40E-06 |
| 1433928_a_at | Rpl13a             | ribosomal protein L13a                                           | 0.170 | 5.00E-07 |
| 1455900_x_at | Tgm2               | transglutaminase 2, C polypeptide                                | 0.171 | 2.00E-06 |

|              |          |                                                              |       |          |
|--------------|----------|--------------------------------------------------------------|-------|----------|
| 1417346_at   | Pycard   | PYD and CARD domain containing                               | 0.171 | 6.10E-06 |
| 1439374_x_at | Rps10    | ribosomal protein S10                                        | 0.173 | 8.63E-05 |
| 1416364_at   | Hsp90ab1 | heat shock protein 90kDa alpha (cytosolic), class B member 1 | 0.174 | 1.80E-06 |
| 1436494_x_at | Trmt1    | TRM1 tRNA methyltransferase 1 homolog (S. cerevisiae)        | 0.174 | 3.50E-06 |
| 1416452_at   | Oat      | ornithine aminotransferase                                   | 0.174 | 1.41E-05 |
| 1417460_at   | Ifitm2   | interferon induced transmembrane protein 2                   | 0.174 | 2.36E-05 |
| 1416807_at   | Rpl36a   | ribosomal protein L36a                                       | 0.175 | 4.30E-06 |
| 1459987_s_at | Cct3     | chaperonin containing Tcp1, subunit 3 (gamma)                | 0.175 | 1.30E-06 |
| 1438961_s_at | Blmh     | bleomycin hydrolase                                          | 0.176 | 9.00E-07 |
| 1419513_a_at | Ect2     | ect2 oncogene                                                | 0.176 | 1.44E-05 |
| 1448252_a_at | Eef1b2   | eukaryotic translation elongation factor 1 beta 2            | 0.178 | 5.00E-07 |
| 1433675_at   | Snord22  | small nucleolar RNA, C/D box 22                              | 0.178 | 1.40E-06 |
| 1443649_at   | NA       | NA                                                           | 0.179 | 9.90E-06 |
| 1438986_x_at | Rps17    | ribosomal protein S17                                        | 0.179 | 1.10E-06 |
| 1417948_s_at | Ilf2     | interleukin enhancer binding factor 2                        | 0.179 | 2.14E-05 |
| 1438320_s_at | Mcm7     | minichromosome maintenance deficient 7 (S. cerevisiae)       | 0.179 | 1.40E-06 |

|              |               |                                                                                    |       |           |
|--------------|---------------|------------------------------------------------------------------------------------|-------|-----------|
| 1448484_at   | Amd1          | S-adenosylmethionine decarboxylase 1                                               | 0.179 | 3.00E-07  |
| 1436836_x_at | LOC100047856  | similar to calponin 3, acidic                                                      | 0.180 | 1.10E-06  |
| 1416802_a_at | Cdca5         | cell division cycle associated 5                                                   | 0.181 | 5.64E-05  |
| 1455950_x_at | Rpl35         | ribosomal protein L35                                                              | 0.184 | 4.00E-07  |
| 1434678_at   | Mbnl3         | muscleblind-like 3 (Drosophila)                                                    | 0.184 | 3.20E-06  |
| 1415851_a_at | Impdh2        | inosine 5-phosphate dehydrogenase 2                                                | 0.186 | 1.70E-06  |
| 1434280_at   | NA            | NA                                                                                 | 0.186 | 7.00E-07  |
| 1422489_at   | Gcs1          | glucosidase 1                                                                      | 0.186 | 8.70E-06  |
| 1416603_at   | Rpl22         | ribosomal protein L22                                                              | 0.187 | 1.20E-06  |
| 1436506_a_at | Snhg6         | small nucleolar RNA host gene (non-protein coding) 6                               | 0.188 | 1.30E-06  |
| 1416893_at   | 3110001A13Rik | RIKEN cDNA 3110001A13 gene                                                         | 0.188 | 0.0001044 |
| 1438649_x_at | Pebp1         | phosphatidylethanolamine binding protein 1                                         | 0.188 | 1.30E-06  |
| 1434231_x_at | Rpl35         | ribosomal protein L35                                                              | 0.189 | 8.00E-07  |
| 1437510_x_at | Rps17         | ribosomal protein S17                                                              | 0.190 | 1.30E-06  |
| 1428506_at   | Atic          | 5-aminoimidazole-4-carboxamide ribonucleotide formyltransferase/IMP cyclohydrolase | 0.191 | 9.60E-06  |
| 1424615_at   | Frag1         | FGF receptor activating protein 1                                                  | 0.191 | 4.30E-06  |

|              |               |                                                                                     |       |           |
|--------------|---------------|-------------------------------------------------------------------------------------|-------|-----------|
| 1456315_a_at | Ptpla         | protein tyrosine phosphatase-like (proline instead of catalytic arginine), member a | 0.192 | 0.0001153 |
| 1438794_x_at | Rps13         | ribosomal protein S13                                                               | 0.192 | 1.50E-06  |
| 1450920_at   | Ccnb2         | cyclin B2                                                                           | 0.193 | 2.55E-05  |
| 1447046_at   | NA            | NA                                                                                  | 0.194 | 7.10E-06  |
| 1455887_at   | Alg8          | asparagine-linked glycosylation 8 homolog (yeast, alpha-1,3-glucosyltransferase)    | 0.194 | 5.62E-05  |
| 1438630_x_at | Mat2a         | methionine adenosyltransferase II, alpha                                            | 0.194 | 4.00E-07  |
| 1434158_at   | Gmds          | GDP-mannose 4, 6-dehydratase                                                        | 0.195 | 2.80E-06  |
| 1457823_at   | Cyr61         | cysteine rich protein 61                                                            | 0.196 | 0.0004907 |
| 1435103_x_at | Farsb         | phenylalanyl-tRNA synthetase, beta subunit                                          | 0.196 | 3.10E-06  |
| 1436840_x_at | Rpl35         | ribosomal protein L35                                                               | 0.196 | 8.00E-07  |
| 1427903_at   | Phpt1         | phosphohistidine phosphatase 1                                                      | 0.197 | 0.0001114 |
| 1448245_at   | Rpsa          | ribosomal protein SA                                                                | 0.197 | 1.40E-06  |
| 1433510_x_at | 100043718     | predicted gene, 100043718                                                           | 0.197 | 1.70E-06  |
| 1455790_at   | E2f2          | E2F transcription factor 2                                                          | 0.198 | 6.30E-06  |
| 1423431_a_at | Mybbp1a       | MYB binding protein (P160) 1a                                                       | 0.199 | 5.40E-06  |
| 1447936_at   | 2410006H16Rik | RIKEN cDNA 2410006H16 gene                                                          | 0.200 | 7.00E-07  |



|                              |               |                                                       |       |           |
|------------------------------|---------------|-------------------------------------------------------|-------|-----------|
| 1415869_a_at                 | Trim28        | tripartite motif-containing 28                        | 0.200 | 6.90E-06  |
| 1452426_x_at                 | NA            | NA                                                    | 0.200 | 2.60E-06  |
| 1433656_a_at                 | Gnl3          | guanine nucleotide binding protein-like 3 (nucleolar) | 0.201 | 7.00E-07  |
| 1428465_at                   | Tmem147       | transmembrane protein 147                             | 0.201 | 9.93E-05  |
| 1426946_at                   | Ipo5          | importin 5                                            | 0.202 | 1.10E-05  |
| 1426897_at                   | Rcc2          | regulator of chromosome condensation 2                | 0.202 | 0.0001447 |
| 1435800_a_at                 | Csda          | cold shock domain protein A                           | 0.202 | 1.84E-05  |
| 1438940_x_at                 | 100040836     | predicted gene, 100040836                             | 0.202 | 5.70E-06  |
| 1418901_at                   | Cebpb         | CCAAT/enhancer binding protein (C/EBP), beta          | 0.203 | 1.52E-05  |
| 1455001_x_at                 | Rpl13a        | ribosomal protein L13a                                | 0.203 | 1.11E-05  |
| 1453377_at                   | Sh2d4a        | SH2 domain containing 4A                              | 0.205 | 6.60E-06  |
| 1441081_a_at                 | 1110038B12Rik | RIKEN cDNA 1110038B12 gene                            | 0.205 | 9.00E-07  |
| AFFX-TransRecMur/X57349_3_at | Tfrc          | transferrin receptor                                  | 0.206 | 8.80E-06  |
| 1415852_at                   | Impdh2        | inosine 5-phosphate dehydrogenase 2                   | 0.206 | 2.40E-06  |
| 1434513_at                   | Atp13a3       | ATPase type 13A3                                      | 0.207 | 2.70E-06  |
| 1426793_a_at                 | Rpl14         | ribosomal protein L14                                 | 0.207 | 3.90E-06  |
| 1447096_at                   | NA            | NA                                                    | 0.207 | 4.04E-05  |
| 1433428_x_at                 | Tgm2          | transglutaminase 2, C polypeptide                     | 0.207 | 3.00E-06  |
| 1435046_at                   | NA            | NA                                                    | 0.208 | 8.40E-06  |
| 1436871_at                   | Sfrs7         | splicing factor, arginine/serine-rich 7               | 0.209 | 1.20E-06  |
| 1417420_at                   | Ccnd1         | cyclin D1                                             | 0.209 | 1.89E-05  |

|              |               |                                                           |       |           |
|--------------|---------------|-----------------------------------------------------------|-------|-----------|
| 1423709_s_at | Farsb         | phenylalanyl-tRNA synthetase, beta subunit                | 0.210 | 6.90E-06  |
| 1456057_x_at | Tmem109       | transmembrane protein 109                                 | 0.210 | 1.86E-05  |
| 1460671_at   | Gpx1          | glutathione peroxidase 1                                  | 0.211 | 1.70E-06  |
| 1436824_x_at | Rnf26         | ring finger protein 26                                    | 0.211 | 2.81E-05  |
| 1435122_x_at | Dnmt1         | DNA methyltransferase (cytosine-5) 1                      | 0.211 | 7.70E-06  |
| 1434624_x_at | Rps9          | ribosomal protein S9                                      | 0.211 | 5.30E-06  |
| 1456438_x_at | Rpn1          | ribophorin I                                              | 0.212 | 8.10E-06  |
| 1424353_at   | Lrpprc        | leucine-rich PPR-motif containing                         | 0.213 | 9.70E-06  |
| 1433721_x_at | Rps21         | ribosomal protein S21                                     | 0.213 | 2.92E-05  |
| 1436688_x_at | Rpl14         | ribosomal protein L14                                     | 0.214 | 2.30E-06  |
| 1448325_at   | Myd116        | myeloid differentiation primary response gene 116         | 0.215 | 0.0001361 |
| 1431766_x_at | Rps2          | ribosomal protein S2                                      | 0.215 | 1.52E-05  |
| 1455604_at   | Fzd5          | frizzled homolog 5 (Drosophila)                           | 0.216 | 5.03E-05  |
| 1416520_x_at | Rpl36         | ribosomal protein L36                                     | 0.216 | 1.40E-06  |
| 1434578_x_at | LOC100045999  | similar to RAN, member RAS oncogene family                | 0.216 | 3.70E-06  |
| 1435484_at   | Slc5a3        | solute carrier family 5 (inositol transporters), member 3 | 0.217 | 1.26E-05  |
| 1416721_s_at | Sfrs6         | splicing factor, arginine/serine-rich 6                   | 0.217 | 4.50E-06  |
| 1452669_at   | 2810012G03Rik | RIKEN cDNA 2810012G03 gene                                | 0.217 | 2.50E-06  |

|              |                   |                                                                         |       |           |
|--------------|-------------------|-------------------------------------------------------------------------|-------|-----------|
| 1417351_a_at | Snrpa1            | small nuclear ribonucleoprotein polypeptide A@#\$\$%&                   | 0.217 | 2.30E-06  |
| 1417125_at   | Ahcy              | S-adenosylhomocysteine hydrolase                                        | 0.217 | 1.76E-05  |
| 1426533_at   | Nol5a             | nucleolar protein 5A                                                    | 0.218 | 2.17E-05  |
| 1442340_x_at | Cyr61             | cysteine rich protein 61                                                | 0.218 | 8.98E-05  |
| 1430271_x_at | Josd3             | Josephin domain containing 3                                            | 0.218 | 1.55E-05  |
| 1452534_a_at | Hmgb2             | high mobility group box 2                                               | 0.219 | 7.20E-06  |
| 1423566_a_at | Hsph1             | heat shock 105kDa/110kDa protein 1                                      | 0.219 | 0.0001088 |
| 1454842_a_at | B3galnt2          | UDP-GalNAc:betaGlcNAc beta 1,3-galactosaminyltransferase, polypeptide 2 | 0.219 | 0.0002845 |
| 1448264_a_at | Eif3i             | eukaryotic translation initiation factor 3, subunit I                   | 0.219 | 1.80E-06  |
| 1433688_x_at | Rpl14             | ribosomal protein L14                                                   | 0.220 | 2.70E-06  |
| 1416605_at   | Nola2             | nucleolar protein family A, member 2                                    | 0.220 | 2.63E-05  |
| 1438977_x_at | Ran               | RAN, member RAS oncogene family                                         | 0.220 | 3.20E-06  |
| 1455357_x_at | OTTMUSG0000016825 | predicted gene, OTTMUSG0000016825                                       | 0.222 | 6.30E-06  |
| 1436046_x_at | Rpl29             | ribosomal protein L29                                                   | 0.222 | 9.60E-06  |
| 1455245_x_at | Rpl13             | ribosomal protein L13                                                   | 0.222 | 4.60E-06  |
| 1438943_x_at | Rpn1              | ribophorin I                                                            | 0.222 | 1.02E-05  |
| 1437008_x_at | Tmem109           | transmembrane protein 109                                               | 0.222 | 2.77E-05  |

|              |               |                                                                                                 |       |           |
|--------------|---------------|-------------------------------------------------------------------------------------------------|-------|-----------|
| 1453257_at   | Agpat5        | 1-acylglycerol-3-phosphate O-acyltransferase 5 (lysophosphatidic acid acyltransferase, epsilon) | 0.223 | 3.42E-05  |
| 1417364_at   | Eef1g         | eukaryotic translation elongation factor 1 gamma                                                | 0.224 | 4.40E-06  |
| 1434278_at   | Mtm1          | X-linked myotubular myopathy gene 1                                                             | 0.224 | 3.55E-05  |
| 1418369_at   | Prim1         | DNA primase, p49 subunit                                                                        | 0.224 | 8.20E-06  |
| 1437277_x_at | Tgm2          | transglutaminase 2, C polypeptide                                                               | 0.225 | 3.00E-06  |
| 1444952_a_at | Nucks1        | nuclear casein kinase and cyclin-dependent kinase substrate 1                                   | 0.225 | 2.30E-06  |
| 1438016_at   | Dkc1          | dyskeratosis congenita 1, dyskerin homolog (human)                                              | 0.226 | 0.0001782 |
| 1417762_a_at | Rpl8          | ribosomal protein L8                                                                            | 0.226 | 6.90E-06  |
| 1438244_at   | Nfib          | nuclear factor I/B                                                                              | 0.226 | 0.0004634 |
| 1417735_at   | 1810030J14Rik | RIKEN cDNA 1810030J14 gene                                                                      | 0.226 | 0.000274  |
| 1418503_at   | Hspa9         | heat shock protein 9                                                                            | 0.226 | 6.50E-06  |
| 1423298_at   | Add3          | adducin 3 (gamma)                                                                               | 0.226 | 9.50E-06  |
| 1451791_at   | Tfpi          | tissue factor pathway inhibitor                                                                 | 0.227 | 0.000118  |
| 1448635_at   | Smc2          | structural maintenance of chromosomes 2                                                         | 0.227 | 0.0001048 |

|              |              |                                                            |       |           |
|--------------|--------------|------------------------------------------------------------|-------|-----------|
| 1456865_x_at | Rrs1         | RRS1 ribosome biogenesis regulator homolog (S. cerevisiae) | 0.227 | 1.60E-06  |
| 1423740_a_at | Rbm10        | RNA binding motif protein 10                               | 0.227 | 4.00E-06  |
| 1429058_at   | Tmem107      | transmembrane protein 107                                  | 0.228 | 0.0011658 |
| 1415771_at   | Ncl          | nucleolin                                                  | 0.228 | 4.30E-06  |
| 1454620_x_at | LOC100043734 | similar to ribosomal protein S6                            | 0.229 | 2.10E-06  |
| 1454636_at   | Cbx5         | chromobox homolog 5 (Drosophila HP1a)                      | 0.229 | 1.22E-05  |
| 1455577_at   | Ccl28        | chemokine (C-C motif) ligand 28                            | 0.230 | 8.80E-06  |
| 1439257_x_at | Rpn1         | ribophorin I                                               | 0.230 | 8.00E-06  |
| 1448872_at   | Reg3g        | regenerating islet-derived 3 gamma                         | 0.230 | 4.40E-06  |
| 1436930_x_at | Hmbs         | hydroxymethylbilane synthase                               | 0.231 | 3.10E-06  |
| 1436699_x_at | LOC100048449 | similar to ribosomal protein L18                           | 0.232 | 2.50E-06  |
| 1439678_at   | NA           | NA                                                         | 0.232 | 2.71E-05  |
| 1439012_a_at | Dck          | deoxycytidine kinase                                       | 0.232 | 7.75E-05  |
| 1456628_x_at | Rps24        | ribosomal protein S24                                      | 0.233 | 8.30E-06  |
| 1449161_at   | Edn2         | endothelin 2                                               | 0.233 | 2.60E-06  |
| 1415879_a_at | Rplp2        | ribosomal protein, large P2                                | 0.234 | 7.90E-06  |
| 1427797_s_at | NA           | NA                                                         | 0.235 | 0.0001448 |
| 1415839_a_at | Npm1         | nucleophosmin 1                                            | 0.235 | 1.02E-05  |
| 1417541_at   | Hells        | helicase, lymphoid specific                                | 0.236 | 1.59E-05  |
| 1438507_x_at | Rpl14        | ribosomal protein L14                                      | 0.236 | 6.90E-06  |
| 1452787_a_at | Prmt1        | protein arginine N-methyltransferase 1                     | 0.236 | 2.55E-05  |

|              |               |                                           |       |           |
|--------------|---------------|-------------------------------------------|-------|-----------|
| 1449323_a_at | Rpl3          | ribosomal protein L3                      | 0.236 | 3.90E-06  |
| 1415822_at   | Scd2          | stearoyl-Coenzyme A desaturase 2          | 0.237 | 3.22E-05  |
| 1438434_at   | Arhgap11a     | Rho GTPase activating protein 11A         | 0.237 | 2.26E-05  |
| 1452597_at   | 2310061C15Rik | RIKEN cDNA 2310061C15 gene                | 0.238 | 2.55E-05  |
| 1427369_at   | Nlrp6         | NLR family, pyrin domain containing 6     | 0.239 | 1.23E-05  |
| 1418566_s_at | Nudcd2        | NudC domain containing 2                  | 0.239 | 5.59E-05  |
| 1454856_x_at | 100038991     | predicted gene, 100038991                 | 0.239 | 6.90E-06  |
| 1424048_a_at | Cyb5r1        | cytochrome b5 reductase 1                 | 0.240 | 8.90E-06  |
| 1419964_s_at | Hdgf          | hepatoma-derived growth factor            | 0.240 | 3.36E-05  |
| 1418715_at   | Pank1         | pantothenate kinase 1                     | 0.240 | 5.50E-06  |
| 1422844_a_at | Wdr77         | WD repeat domain 77                       | 0.240 | 0.0005148 |
| 1449410_a_at | Gas5          | growth arrest specific 5                  | 0.241 | 4.80E-06  |
| 1455767_x_at | Rpl21         | ribosomal protein L21                     | 0.241 | 6.90E-06  |
| 1448353_x_at | Rpn1          | ribophorin I                              | 0.241 | 2.37E-05  |
| 1416519_at   | Rpl36         | ribosomal protein L36                     | 0.242 | 1.01E-05  |
| 1420965_a_at | Enc1          | ectodermal-neural cortex 1                | 0.243 | 3.10E-06  |
| 1423735_a_at | Wdr36         | WD repeat domain 36                       | 0.243 | 0.0003044 |
| 1455814_x_at | Ddx39         | DEAD (Asp-Glu-Ala-Asp) box polypeptide 39 | 0.243 | 4.50E-06  |
| 1418334_at   | Dbf4          | DBF4 homolog (S. cerevisiae)              | 0.243 | 6.89E-05  |
| 1419270_a_at | Dut           | deoxyuridine triphosphatase               | 0.243 | 7.35E-05  |
| 1443104_at   | NA            | NA                                        | 0.243 | 7.14E-05  |
| 1448947_at   | 2810004N23Rik | RIKEN cDNA 2810004N23 gene                | 0.244 | 3.30E-06  |
| 1438626_x_at | Rpl14         | ribosomal protein L14                     | 0.245 | 1.02E-05  |

|              |              |                                                                           |       |           |
|--------------|--------------|---------------------------------------------------------------------------|-------|-----------|
| 1426749_at   | Prmt3        | protein arginine N-methyltransferase 3                                    | 0.245 | 6.40E-06  |
| 1427214_at   | Agmat        | agmatine ureohydrolase (agmatinase)                                       | 0.245 | 0.0001915 |
| 1416998_at   | Rrs1         | RRS1 ribosome biogenesis regulator homolog (S. cerevisiae)                | 0.245 | 7.72E-05  |
| 1421819_a_at | Set          | SET translocation                                                         | 0.246 | 1.01E-05  |
| 1433569_x_at | LOC100045999 | similar to RAN, member RAS oncogene family                                | 0.246 | 4.10E-06  |
| 1427683_at   | Egr2         | early growth response 2                                                   | 0.246 | 0.0001026 |
| 1456531_x_at | Prpf19       | PRP19/PSO4 pre-mRNA processing factor 19 homolog (S. cerevisiae)          | 0.246 | 4.30E-06  |
| 1435712_a_at | LOC100042388 | similar to ribosomal protein S18                                          | 0.247 | 1.32E-05  |
| 1455713_x_at | Phb2         | prohibitin 2                                                              | 0.247 | 1.55E-05  |
| 1456194_a_at | Park7        | Parkinson disease (autosomal recessive, early onset) 7                    | 0.248 | 9.30E-06  |
| 1437405_a_at | Igfbp4       | insulin-like growth factor binding protein 4                              | 0.248 | 0.0001467 |
| 1424076_at   | Gdpd1        | glycerophosphodiester phosphodiesterase domain containing 1               | 0.248 | 1.80E-05  |
| 1421817_at   | Gsr          | glutathione reductase                                                     | 0.248 | 7.90E-06  |
| 1455168_a_at | Gnb2l1       | guanine nucleotide binding protein (G protein), beta polypeptide 2 like 1 | 0.248 | 2.42E-05  |

|              |                   |                                                                                 |       |           |
|--------------|-------------------|---------------------------------------------------------------------------------|-------|-----------|
| 1438852_x_at | Mcm6              | minichromosome maintenance deficient 6 (MIS5 homolog, S. pombe) (S. cerevisiae) | 0.249 | 6.10E-06  |
| 1428976_at   | Tmpo              | thymopoietin                                                                    | 0.249 | 6.36E-05  |
| 1455662_x_at | Rps17             | ribosomal protein S17                                                           | 0.250 | 1.45E-05  |
| 1435534_a_at | OTTMUSG0000016825 | predicted gene, OTTMUSG0000016825                                               | 0.250 | 3.40E-06  |
| 1449243_a_at | Rps19             | ribosomal protein S19                                                           | 0.250 | 3.95E-05  |
| 1449648_s_at | Rpo1-1            | RNA polymerase 1-1                                                              | 0.250 | 7.10E-06  |
| 1434358_x_at | Rps21             | ribosomal protein S21                                                           | 0.251 | 2.14E-05  |
| 1424854_at   | Hist1h4i          | histone cluster 1, H4i                                                          | 0.251 | 1.74E-05  |
| 1447585_s_at | Slc5a3            | solute carrier family 5 (inositol transporters), member 3                       | 0.252 | 9.60E-06  |
| 1424321_at   | Rfc4              | replication factor C (activator 1) 4                                            | 0.252 | 0.0001212 |
| 1423969_at   | Nup37             | nucleoporin 37                                                                  | 0.252 | 1.21E-05  |
| 1455572_x_at | LOC100042388      | similar to ribosomal protein S18                                                | 0.254 | 5.20E-06  |
| 1434232_a_at | 2610030H06Rik     | RIKEN cDNA 2610030H06 gene                                                      | 0.254 | 8.02E-05  |
| 1416526_a_at | Park7             | Parkinson disease (autosomal recessive, early onset) 7                          | 0.254 | 1.95E-05  |
| 1417057_a_at | Ppid              | peptidylprolyl isomerase D (cyclophilin D)                                      | 0.254 | 1.57E-05  |
| 1445684_s_at | Hdac2             | histone deacetylase 2                                                           | 0.254 | 1.11E-05  |
| 1433444_at   | LOC100040592      | similar to Hmgcs1 protein                                                       | 0.254 | 5.80E-06  |
| 1459986_a_at | Rps17             | ribosomal protein S17                                                           | 0.255 | 2.15E-05  |



|              |              |                                                               |       |          |
|--------------|--------------|---------------------------------------------------------------|-------|----------|
| 1427680_a_at | Nfib         | nuclear factor I/B                                            | 0.256 | 5.22E-05 |
| 1417629_at   | Prodh        | proline dehydrogenase                                         | 0.256 | 4.52E-05 |
| 1433519_at   | Nucks1       | nuclear casein kinase and cyclin-dependent kinase substrate 1 | 0.256 | 3.69E-05 |
| 1438951_x_at | Nup54        | nucleoporin 54                                                | 0.256 | 9.90E-06 |
| 1416142_at   | Rps6         | ribosomal protein S6                                          | 0.257 | 5.32E-05 |
| 1417511_at   | Lyar         | Ly1 antibody reactive clone                                   | 0.257 | 1.41E-05 |
| 1419291_x_at | Gas5         | growth arrest specific 5                                      | 0.258 | 7.60E-06 |
| 1418896_a_at | Rpn2         | ribophorin II                                                 | 0.258 | 4.87E-05 |
| 1430288_x_at | Rps21        | ribosomal protein S21                                         | 0.258 | 5.65E-05 |
| 1424883_s_at | Sfrs7        | splicing factor, arginine/serine-rich 7                       | 0.258 | 5.60E-06 |
| 1433549_x_at | Rps21        | ribosomal protein S21                                         | 0.258 | 4.99E-05 |
| 1415889_a_at | Hsp90b1      | heat shock protein 90, beta (Grp94), member 1                 | 0.258 | 9.80E-06 |
| 1451144_at   | Bxdc2        | brix domain containing 2                                      | 0.258 | 2.18E-05 |
| 1422524_at   | Abcb6        | ATP-binding cassette, sub-family B (MDR/TAP), member 6        | 0.258 | 8.80E-06 |
| 1416064_a_at | Hspa5        | heat shock protein 5                                          | 0.259 | 4.50E-06 |
| 1438096_a_at | Dtymk        | deoxythymidylate kinase                                       | 0.260 | 2.51E-05 |
| 1436040_at   | LOC100039864 | hypothetical protein LOC100039864                             | 0.260 | 1.42E-05 |
| 1431214_at   | LOC67527     | murine leukemia retrovirus                                    | 0.260 | 0.000449 |
| 1460581_a_at | Rpl13        | ribosomal protein L13                                         | 0.261 | 8.40E-06 |

|              |         |                                                         |       |           |
|--------------|---------|---------------------------------------------------------|-------|-----------|
| 1417353_x_at | Snrpa1  | small nuclear ribonucleoprotein polypeptide A@#\$\$%&   | 0.261 | 6.90E-06  |
| 1434854_a_at | Rps10   | ribosomal protein S10                                   | 0.261 | 1.86E-05  |
| 1415943_at   | Sdc1    | syndecan 1                                              | 0.261 | 1.26E-05  |
| 1424204_at   | Mrpl13  | mitochondrial ribosomal protein L13                     | 0.262 | 3.77E-05  |
| 1436689_a_at | Aldh9a1 | aldehyde dehydrogenase 9, subfamily A1                  | 0.262 | 1.07E-05  |
| 1451230_a_at | Wbp5    | WW domain binding protein 5                             | 0.263 | 2.55E-05  |
| 1417926_at   | Ncapg2  | non-SMC condensin II complex, subunit G2                | 0.263 | 0.0001357 |
| 1415773_at   | Ncl     | nucleolin                                               | 0.265 | 1.04E-05  |
| 1432164_a_at | Gcsh    | glycine cleavage system protein H (aminomethyl carrier) | 0.265 | 2.15E-05  |
| 1450048_a_at | Idh2    | isocitrate dehydrogenase 2 (NADP+), mitochondrial       | 0.265 | 4.00E-05  |
| 1423667_at   | Mat2a   | methionine adenosyltransferase II, alpha                | 0.265 | 1.22E-05  |
| 1460259_s_at | Clca2   | chloride channel calcium activated 2                    | 0.265 | 1.08E-05  |
| 1422441_x_at | Cdk4    | cyclin-dependent kinase 4                               | 0.266 | 0.0005093 |
| 1433576_at   | Mat2a   | methionine adenosyltransferase II, alpha                | 0.266 | 4.54E-05  |
| 1435227_at   | Bcl11b  | B-cell leukemia/lymphoma 11B                            | 0.266 | 8.00E-06  |

|              |              |                                                                  |       |           |
|--------------|--------------|------------------------------------------------------------------|-------|-----------|
| 1433640_at   | Fubp1        | far upstream element (FUSE) binding protein 1                    | 0.266 | 0.0003193 |
| 1423804_a_at | Idi1         | isopentenyl-diphosphate delta isomerase                          | 0.266 | 1.04E-05  |
| 1428182_at   | Prpsap1      | phosphoribosyl pyrophosphate synthetase-associated protein 1     | 0.266 | 1.46E-05  |
| 1448526_at   | Kpnb1        | karyopherin (importin) beta 1                                    | 0.266 | 4.35E-05  |
| 1448178_a_at | Cct3         | chaperonin containing Tcp1, subunit 3 (gamma)                    | 0.267 | 1.38E-05  |
| 1451649_a_at | Wdr75        | WD repeat domain 75                                              | 0.267 | 1.63E-05  |
| 1417399_at   | Gas6         | growth arrest specific 6                                         | 0.267 | 0.0001298 |
| 1420592_a_at | Anp32e       | acidic (leucine-rich) nuclear phosphoprotein 32 family, member E | 0.268 | 8.70E-06  |
| 1417936_at   | Ccl9         | chemokine (C-C motif) ligand 9                                   | 0.268 | 0.0001721 |
| 1455740_at   | Hnrnpa1      | heterogeneous nuclear ribonucleoprotein A1                       | 0.268 | 0.0006866 |
| 1416685_s_at | Fbl          | fibrillarlin                                                     | 0.268 | 0.000121  |
| 1456374_x_at | Eif3c        | eukaryotic translation initiation factor 3, subunit C            | 0.269 | 6.10E-06  |
| 1439270_x_at | LOC100045999 | similar to RAN, member RAS oncogene family                       | 0.269 | 7.20E-06  |
| 1451122_at   | Idi1         | isopentenyl-diphosphate delta isomerase                          | 0.270 | 1.02E-05  |

|              |                   |                                                                                |       |           |
|--------------|-------------------|--------------------------------------------------------------------------------|-------|-----------|
| 1415945_at   | Mcm5              | minichromosome maintenance deficient 5, cell division cycle 46 (S. cerevisiae) | 0.270 | 0.0002643 |
| 1448921_a_at | Mrps9             | mitochondrial ribosomal protein S9                                             | 0.270 | 1.06E-05  |
| 1416184_s_at | Hmga1             | high mobility group AT-hook 1                                                  | 0.271 | 0.0001285 |
| 1417028_a_at | Trim2             | tripartite motif-containing 2                                                  | 0.271 | 0.0006391 |
| 1437976_x_at | Rpl23a            | ribosomal protein L23a                                                         | 0.271 | 8.10E-06  |
| 1437851_x_at | Rnps1             | ribonucleic acid binding protein S1                                            | 0.272 | 1.16E-05  |
| 1448217_a_at | Rpl27             | ribosomal protein L27                                                          | 0.272 | 1.13E-05  |
| 1452154_at   | Iars              | isoleucine-tRNA synthetase                                                     | 0.272 | 0.0003929 |
| 1415692_s_at | Canx              | calnexin                                                                       | 0.274 | 5.28E-05  |
| 1449930_a_at | Ssr2              | signal sequence receptor, beta                                                 | 0.274 | 0.0002962 |
| 1449196_a_at | Rps27a            | ribosomal protein S27a                                                         | 0.275 | 9.50E-06  |
| 1418982_at   | Cebpa             | CCAAT/enhancer binding protein (C/EBP), alpha                                  | 0.275 | 0.0002607 |
| 1434543_a_at | Bola2             | bolA-like 2 (E. coli)                                                          | 0.275 | 1.05E-05  |
| 1438776_x_at | 100040123         | predicted gene, 100040123                                                      | 0.276 | 3.89E-05  |
| 1454627_a_at | ENSMUSG0000074516 | predicted gene, ENSMUSG0000074516                                              | 0.276 | 1.12E-05  |
| 1451405_at   | Pcca              | propionyl-Coenzyme A carboxylase, alpha polypeptide                            | 0.276 | 9.70E-06  |
| 1448358_s_at | Snrpg             | small nuclear ribonucleoprotein polypeptide G                                  | 0.276 | 3.11E-05  |

|              |         |                                                                       |       |           |
|--------------|---------|-----------------------------------------------------------------------|-------|-----------|
| 1416701_at   | Rnd3    | Rho family GTPase 3                                                   | 0.276 | 1.42E-05  |
| 1455084_x_at | Shmt2   | serine hydroxymethyltransferase 2 (mitochondrial)                     | 0.277 | 5.51E-05  |
| 1438168_x_at | Ddx39   | DEAD (Asp-Glu-Ala-Asp) box polypeptide 39                             | 0.277 | 1.40E-05  |
| 1439422_a_at | C1qdc2  | C1q domain containing 2                                               | 0.277 | 8.40E-06  |
| 1448221_at   | Bat1a   | HLA-B-associated transcript 1A                                        | 0.277 | 6.18E-05  |
| 1417065_at   | Egr1    | early growth response 1                                               | 0.277 | 2.34E-05  |
| 1416470_a_at | Rpn1    | ribophorin I                                                          | 0.277 | 6.19E-05  |
| 1416015_s_at | Abce1   | ATP-binding cassette, sub-family E (OABP), member 1                   | 0.277 | 1.45E-05  |
| 1448224_at   | Tfam    | transcription factor A, mitochondrial                                 | 0.278 | 2.80E-05  |
| 1416203_at   | Aqp1    | aquaporin 1                                                           | 0.278 | 0.0003559 |
| 1451170_s_at | Nomo1   | nodal modulator 1                                                     | 0.278 | 5.25E-05  |
| 1433960_at   | Isg20l2 | interferon stimulated exonuclease gene 20-like 2                      | 0.279 | 0.000148  |
| 1428744_s_at | Bri3bp  | Bri3 binding protein                                                  | 0.279 | 0.0016658 |
| 1436549_a_at | Hnrnpa1 | heterogeneous nuclear ribonucleoprotein A1                            | 0.280 | 1.22E-05  |
| 1418365_at   | Ctsh    | cathepsin H                                                           | 0.280 | 2.81E-05  |
| 1415802_at   | Slc16a1 | solute carrier family 16 (monocarboxylic acid transporters), member 1 | 0.280 | 0.0002839 |
| 1416088_a_at | Rps15   | ribosomal protein S15                                                 | 0.281 | 4.96E-05  |

|              |          |                                                                                        |       |           |
|--------------|----------|----------------------------------------------------------------------------------------|-------|-----------|
| 1438902_a_at | Hsp90aa1 | heat shock protein 90, alpha (cytosolic), class A member 1                             | 0.281 | 2.28E-05  |
| 1452210_at   | Dna2     | DNA replication helicase 2 homolog (yeast)                                             | 0.281 | 6.04E-05  |
| 1456497_x_at | Rps10    | ribosomal protein S10                                                                  | 0.281 | 2.40E-05  |
| 1439439_x_at | Eef1d    | eukaryotic translation elongation factor 1 delta (guanine nucleotide exchange protein) | 0.281 | 1.77E-05  |
| 1436979_x_at | Rbm14    | RNA binding motif protein 14                                                           | 0.281 | 9.11E-05  |
| 1427464_s_at | Hspa5    | heat shock protein 5                                                                   | 0.282 | 1.45E-05  |
| 1422814_at   | Aspm     | asp (abnormal spindle)-like, microcephaly associated (Drosophila)                      | 0.282 | 8.14E-05  |
| 1427439_s_at | Prmt5    | protein arginine N-methyltransferase 5                                                 | 0.282 | 0.0001502 |
| 1416135_at   | Apex1    | apurinic/apyrimidinic endonuclease 1                                                   | 0.283 | 5.41E-05  |
| 1418152_at   | Nsbp1    | nucleosome binding protein 1                                                           | 0.284 | 5.65E-05  |
| 1427798_x_at | NA       | NA                                                                                     | 0.284 | 0.0017978 |
| 1419441_at   | Rplp0    | ribosomal protein, large, P0                                                           | 0.284 | 3.37E-05  |
| 1418504_at   | Hspa9    | heat shock protein 9                                                                   | 0.284 | 6.62E-05  |
| 1455800_x_at | Samm50   | sorting and assembly machinery component 50 homolog (S. cerevisiae)                    | 0.284 | 1.96E-05  |

|              |              |                                                        |       |           |
|--------------|--------------|--------------------------------------------------------|-------|-----------|
| 1451294_s_at | Snrpe        | small nuclear ribonucleoprotein E                      | 0.285 | 3.16E-05  |
| 1426661_at   | Rpl27a       | ribosomal protein L27a                                 | 0.285 | 4.51E-05  |
| 1426573_at   | Me2          | malic enzyme 2, NAD(+)-dependent, mitochondrial        | 0.285 | 2.36E-05  |
| 1455951_at   | Mars         | methionine-tRNA synthetase                             | 0.286 | 4.12E-05  |
| 1433535_x_at | Cct2         | chaperonin containing Tcp1, subunit 2 (beta)           | 0.287 | 1.26E-05  |
| 1417985_at   | Nrarp        | Notch-regulated ankyrin repeat protein                 | 0.288 | 2.40E-05  |
| 1452130_at   | LOC100048541 | similar to thioredoxin-related transmembrane protein 2 | 0.288 | 0.0003586 |
| 1424797_a_at | Pitx2        | paired-like homeodomain transcription factor 2         | 0.289 | 9.43E-05  |
| 1436174_at   | Atad2        | ATPase family, AAA domain containing 2                 | 0.289 | 3.63E-05  |
| 1423074_at   | Lman2        | lectin, mannose-binding 2                              | 0.289 | 6.39E-05  |
| 1438391_x_at | Hsd17b10     | hydroxysteroid (17-beta) dehydrogenase 10              | 0.289 | 6.82E-05  |
| 1456436_x_at | Rps20        | ribosomal protein S20                                  | 0.290 | 1.41E-05  |
| 1437193_s_at | Snrpb        | small nuclear ribonucleoprotein B                      | 0.290 | 0.0001827 |
| 1415785_a_at | Cct8         | chaperonin containing Tcp1, subunit 8 (theta)          | 0.290 | 2.20E-05  |
| 1419736_a_at | Eif1ay       | eukaryotic translation initiation factor 1A, Y-linked  | 0.291 | 3.09E-05  |

|              |        |                                                               |       |           |
|--------------|--------|---------------------------------------------------------------|-------|-----------|
| 1455102_at   | Larp4  | La ribonucleoprotein domain family, member 4                  | 0.291 | 0.0001703 |
| 1415761_at   | Mrpl52 | mitochondrial ribosomal protein L52                           | 0.291 | 0.0001016 |
| 1442350_at   | NA     | NA                                                            | 0.292 | 0.0005209 |
| 1456393_at   | Pdcd4  | programmed cell death 4                                       | 0.292 | 1.86E-05  |
| 1451065_a_at | Ddx39  | DEAD (Asp-Glu-Ala-Asp) box polypeptide 39                     | 0.292 | 1.62E-05  |
| 1420525_a_at | Otc    | ornithine transcarbamylase                                    | 0.292 | 4.27E-05  |
| 1448619_at   | Dhcr7  | 7-dehydrocholesterol reductase                                | 0.292 | 0.0001757 |
| 1448846_a_at | Rpl29  | ribosomal protein L29                                         | 0.292 | 5.63E-05  |
| 1416202_at   | Phb2   | prohibitin 2                                                  | 0.293 | 0.0001831 |
| 1425142_a_at | Hnrnpd | heterogeneous nuclear ribonucleoprotein D                     | 0.293 | 5.58E-05  |
| 1452866_at   | Nars   | asparaginyl-tRNA synthetase                                   | 0.293 | 2.25E-05  |
| 1422495_a_at | Hmgn1  | high mobility group nucleosomal binding domain 1              | 0.293 | 3.75E-05  |
| 1435753_a_at | Nucks1 | nuclear casein kinase and cyclin-dependent kinase substrate 1 | 0.293 | 0.0002627 |
| 1417156_at   | Krt19  | keratin 19                                                    | 0.296 | 8.39E-05  |
| 1417258_at   | Cct5   | chaperonin containing Tcp1, subunit 5 (epsilon)               | 0.296 | 3.73E-05  |
| 1433575_at   | Sox4   | SRY-box containing gene 4                                     | 0.296 | 5.15E-05  |
| 1454866_s_at | Clic6  | chloride intracellular channel 6                              | 0.296 | 0.0003541 |



|              |               |                                                                  |       |           |
|--------------|---------------|------------------------------------------------------------------|-------|-----------|
| 1448882_at   | Tmem93        | transmembrane protein 93                                         | 0.296 | 2.83E-05  |
| 1457068_at   | Naalad1       | N-acetylated alpha-linked acidic dipeptidase-like 1              | 0.296 | 0.0007253 |
| 1416151_at   | Sfrs3         | splicing factor, arginine/serine-rich 3 (SRp20)                  | 0.297 | 0.0014314 |
| 1448563_at   | Phb           | prohibitin                                                       | 0.297 | 0.0002247 |
| 1457257_x_at | NA            | NA                                                               | 0.298 | 0.0011297 |
| 1455305_x_at | Hnrnpa1       | heterogeneous nuclear ribonucleoprotein A1                       | 0.298 | 3.98E-05  |
| 1435151_a_at | Rps3          | ribosomal protein S3                                             | 0.298 | 2.09E-05  |
| 1449628_s_at | Stard7        | START domain containing 7                                        | 0.299 | 2.43E-05  |
| 1456735_x_at | Acpl2         | acid phosphatase-like 2                                          | 0.299 | 1.65E-05  |
| 1434109_at   | Sh3bgrl2      | SH3 domain binding glutamic acid-rich protein like 2             | 0.299 | 2.78E-05  |
| 1442824_at   | 8030497I03Rik | RIKEN cDNA 8030497I03 gene                                       | 0.300 | 0.0001113 |
| 1436759_x_at | LOC100047856  | similar to calponin 3, acidic                                    | 0.300 | 0.0002141 |
| 1447053_x_at | Ssr3          | signal sequence receptor, gamma                                  | 0.300 | 5.25E-05  |
| 1425815_a_at | Hmmr          | hyaluronan mediated motility receptor (RHAMM)                    | 0.301 | 0.0006331 |
| 1446692_at   | NA            | NA                                                               | 0.301 | 0.0001875 |
| 1455496_at   | Pfas          | phosphoribosylformylglycinamide synthase (FGAR amidotransferase) | 0.301 | 0.0006329 |

|              |               |                                                     |       |           |
|--------------|---------------|-----------------------------------------------------|-------|-----------|
| 1437005_a_at | Rpl18         | ribosomal protein L18                               | 0.301 | 2.78E-05  |
| 1456032_x_at | H2afz         | H2A histone family, member Z                        | 0.301 | 2.09E-05  |
| 1448357_at   | Snrpg         | small nuclear ribonucleoprotein polypeptide G       | 0.301 | 6.79E-05  |
| 1419499_at   | Gpam          | glycerol-3-phosphate acyltransferase, mitochondrial | 0.302 | 0.0001591 |
| 1437246_x_at | Rps6          | ribosomal protein S6                                | 0.303 | 4.59E-05  |
| 1438800_at   | Nagk          | N-acetylglucosamine kinase                          | 0.304 | 0.0004347 |
| 1455855_x_at | Agxt2l2       | alanine-glyoxylate aminotransferase 2-like 2        | 0.304 | 1.77E-05  |
| 1439428_x_at | Gmms          | GDP-mannose 4, 6-dehydratase                        | 0.304 | 0.0002513 |
| 1439057_x_at | Zdhhc6        | zinc finger, DHHC domain containing 6               | 0.304 | 5.96E-05  |
| 1415855_at   | Kitl          | kit ligand                                          | 0.304 | 0.0002272 |
| 1434866_x_at | Cpt1a         | carnitine palmitoyltransferase 1a, liver            | 0.304 | 0.0001691 |
| 1436222_at   | Gas5          | growth arrest specific 5                            | 0.304 | 0.0001484 |
| 1449194_at   | Mrps25        | mitochondrial ribosomal protein S25                 | 0.304 | 3.21E-05  |
| 1434021_at   | C230096C10Rik | RIKEN cDNA C230096C10 gene                          | 0.305 | 0.0002507 |
| 1435524_at   | NA            | NA                                                  | 0.305 | 6.29E-05  |
| 1460701_a_at | Mrpl52        | mitochondrial ribosomal protein L52                 | 0.305 | 2.65E-05  |
| 1447905_x_at | Nup62         | nucleoporin 62                                      | 0.306 | 0.0001668 |
| 1426853_at   | Set           | SET translocation                                   | 0.306 | 3.53E-05  |
| 1423233_at   | Cebpd         | CCAAT/enhancer binding protein (C/EBP), delta       | 0.306 | 5.83E-05  |

|              |                   |                                                        |       |           |
|--------------|-------------------|--------------------------------------------------------|-------|-----------|
| 1422449_s_at | Rcn2              | reticulocalbin 2                                       | 0.306 | 5.88E-05  |
| 1415772_at   | Ncl               | nucleolin                                              | 0.306 | 0.0001785 |
| 1431765_a_at | Rps2              | ribosomal protein S2                                   | 0.306 | 7.04E-05  |
| 1416319_at   | Adk               | adenosine kinase                                       | 0.306 | 0.0003742 |
| 1434367_s_at | ENSMUSG0000071497 | predicted gene, ENSMUSG0000071497                      | 0.306 | 4.98E-05  |
| 1416290_a_at | Psmc4             | proteasome (prosome, macropain) 26S subunit, ATPase, 4 | 0.307 | 0.0001065 |
| 1452241_at   | Topbp1            | topoisomerase (DNA) II binding protein 1               | 0.307 | 6.62E-05  |
| 1458296_at   | NA                | NA                                                     | 0.307 | 4.72E-05  |
| 1422134_at   | Fosb              | FBJ osteosarcoma oncogene B                            | 0.307 | 0.0007934 |
| 1426713_s_at | Eprs              | glutamyl-prolyl-tRNA synthetase                        | 0.308 | 6.37E-05  |
| 1416106_at   | Kti12             | KT112 homolog, chromatin associated (S. cerevisiae)    | 0.308 | 0.0001814 |
| 1427997_at   | 1110007M04Rik     | RIKEN cDNA 1110007M04 gene                             | 0.308 | 0.0003233 |
| 1416700_at   | Rnd3              | Rho family GTPase 3                                    | 0.308 | 0.0002306 |
| 1433432_x_at | Rps12             | ribosomal protein S12                                  | 0.308 | 6.42E-05  |
| 1426705_s_at | lars              | isoleucine-tRNA synthetase                             | 0.308 | 6.08E-05  |
| 1455956_x_at | Ccnd2             | cyclin D2                                              | 0.309 | 3.03E-05  |
| 1417665_a_at | Cpsf1             | cleavage and polyadenylation specific factor 1         | 0.309 | 5.00E-05  |
| 1427539_a_at | Zwint             | ZW10 interactor                                        | 0.309 | 4.18E-05  |

|              |               |                                                                                                            |       |           |
|--------------|---------------|------------------------------------------------------------------------------------------------------------|-------|-----------|
| 1426482_at   | Prkrir        | protein-kinase, interferon-inducible double stranded RNA dependent inhibitor, repressor of (P58 repressor) | 0.309 | 3.43E-05  |
| 1434354_at   | Maob          | monoamine oxidase B                                                                                        | 0.309 | 4.87E-05  |
| 1449080_at   | Hdac2         | histone deacetylase 2                                                                                      | 0.309 | 0.0001343 |
| 1435277_x_at | Nme1          | non-metastatic cells 1, protein (NM23A) expressed in                                                       | 0.309 | 0.0001237 |
| 1418656_at   | Lsm5          | LSM5 homolog, U6 small nuclear RNA associated (S. cerevisiae)                                              | 0.310 | 0.0003058 |
| 1438009_at   | Hist1h2ae     | histone cluster 1, H2ae                                                                                    | 0.310 | 0.0021792 |
| 1428684_at   | 1500001M20Rik | RIKEN cDNA 1500001M20 gene                                                                                 | 0.310 | 6.87E-05  |
| 1437163_x_at | Gtf2h4        | general transcription factor II H, polypeptide 4                                                           | 0.310 | 6.46E-05  |
| 1456169_at   | EG226654      | predicted gene, EG226654                                                                                   | 0.310 | 4.70E-05  |
| 1416925_at   | Kpnb1         | karyopherin (importin) beta 1                                                                              | 0.310 | 3.21E-05  |
| 1452877_at   | 2700029M09Rik | RIKEN cDNA 2700029M09 gene                                                                                 | 0.310 | 0.0004062 |
| 1420139_s_at | Krr1          | KRR1, small subunit (SSU) processome component, homolog (yeast)                                            | 0.311 | 2.39E-05  |
| 1416915_at   | Msh6          | mutS homolog 6 (E. coli)                                                                                   | 0.311 | 5.05E-05  |

|              |               |                                                             |       |           |
|--------------|---------------|-------------------------------------------------------------|-------|-----------|
| 1455348_x_at | Rpl29         | ribosomal protein L29                                       | 0.312 | 4.54E-05  |
| 1433891_at   | Lgr4          | leucine-rich repeat-containing G protein-coupled receptor 4 | 0.312 | 0.0003548 |
| 1431521_at   | 5033428B15Rik | RIKEN cDNA 5033428B15 gene                                  | 0.312 | 0.0021471 |
| 1426660_x_at | Rpl23a        | ribosomal protein L23a                                      | 0.312 | 3.69E-05  |
| 1415762_x_at | Mrpl52        | mitochondrial ribosomal protein L52                         | 0.312 | 0.0001895 |
| 1416233_at   | Eif3i         | eukaryotic translation initiation factor 3, subunit I       | 0.312 | 3.09E-05  |
| 1451052_at   | Pdf           | peptide deformylase (mitochondrial)                         | 0.312 | 8.39E-05  |
| 1416089_at   | Rps15         | ribosomal protein S15                                       | 0.312 | 0.0001366 |
| 1415947_at   | Creg1         | cellular repressor of E1A-stimulated genes 1                | 0.312 | 0.0002264 |
| 1460354_a_at | Mrpl13        | mitochondrial ribosomal protein L13                         | 0.313 | 7.85E-05  |
| 1416150_a_at | Sfrs3         | splicing factor, arginine/serine-rich 3 (SRp20)             | 0.313 | 2.28E-05  |
| 1435338_at   | Cdk6          | cyclin-dependent kinase 6                                   | 0.313 | 0.0005091 |
| 1450405_at   | Mrpl19        | mitochondrial ribosomal protein L19                         | 0.314 | 9.52E-05  |
| 1417081_a_at | Syngn2        | synaptogyrin 2                                              | 0.314 | 0.0002796 |
| 1418777_at   | Ccl25         | chemokine (C-C motif) ligand 25                             | 0.314 | 0.0002263 |
| 1456373_x_at | Rps20         | ribosomal protein S20                                       | 0.314 | 3.23E-05  |

|              |               |                                                                                    |       |           |
|--------------|---------------|------------------------------------------------------------------------------------|-------|-----------|
| 1421144_at   | Rpgrip1       | retinitis pigmentosa GTPase regulator interacting protein 1                        | 0.314 | 5.37E-05  |
| 1452239_at   | Gt(ROSA)26Sor | gene trap ROSA26, Philippe Soriano                                                 | 0.314 | 0.0001061 |
| 1433789_at   | Snhg3         | small nucleolar RNA host gene (non-protein coding) 3                               | 0.314 | 3.01E-05  |
| 1416335_at   | Mif           | macrophage migration inhibitory factor                                             | 0.314 | 0.0006703 |
| 1449000_at   | D10Jhu81e     | DNA segment, Chr 10, Johns Hopkins University 81 expressed                         | 0.315 | 0.0001052 |
| 1448253_at   | Glud1         | glutamate dehydrogenase 1                                                          | 0.315 | 4.58E-05  |
| 1436816_at   | Nup133        | nucleoporin 133                                                                    | 0.316 | 0.0003608 |
| 1428531_at   | Ints7         | integrator complex subunit 7                                                       | 0.316 | 3.54E-05  |
| 1417317_s_at | Rpl35a        | ribosomal protein L35a                                                             | 0.316 | 3.50E-05  |
| 1418640_at   | Sirt1         | sirtuin 1 (silent mating type information regulation 2, homolog) 1 (S. cerevisiae) | 0.316 | 7.61E-05  |
| 1426155_a_at | Osr2          | odd-skipped related 2 (Drosophila)                                                 | 0.316 | 0.0010919 |
| 1431213_a_at | LOC67527      | murine leukemia retrovirus                                                         | 0.316 | 0.0002499 |
| 1421081_a_at | Banf1         | barrier to autointegration factor 1                                                | 0.316 | 0.0006559 |
| 1459747_at   | NA            | NA                                                                                 | 0.317 | 0.0024247 |
| 1455908_a_at | Scpep1        | serine carboxypeptidase 1                                                          | 0.317 | 6.66E-05  |

|              |               |                                                           |       |           |
|--------------|---------------|-----------------------------------------------------------|-------|-----------|
| 1420984_at   | Pctp          | phosphatidylcholine transfer protein                      | 0.317 | 0.0007642 |
| 1435413_x_at | 2700060E02Rik | RIKEN cDNA 2700060E02 gene                                | 0.317 | 2.62E-05  |
| 1428553_at   | Glrx5         | glutaredoxin 5 homolog (S. cerevisiae)                    | 0.317 | 0.0002561 |
| 1425183_a_at | Rpl4          | ribosomal protein L4                                      | 0.317 | 0.0001228 |
| 1436508_at   | 2410014A08Rik | RIKEN cDNA 2410014A08 gene                                | 0.317 | 0.0003048 |
| 1434767_at   | C79407        | expressed sequence C79407                                 | 0.318 | 0.0005153 |
| 1424573_at   | Tmed5         | transmembrane emp24 protein transport domain containing 5 | 0.318 | 7.80E-05  |
| 1416074_a_at | Rpl28         | ribosomal protein L28                                     | 0.318 | 0.0002603 |
| 1436884_x_at | Ewsr1         | Ewing sarcoma breakpoint region 1                         | 0.318 | 3.55E-05  |
| 1452635_x_at | Josd3         | Josephin domain containing 3                              | 0.318 | 0.0003609 |
| 1455970_at   | NA            | NA                                                        | 0.319 | 3.10E-05  |
| 1429467_s_at | Slc26a3       | solute carrier family 26, member 3                        | 0.319 | 4.76E-05  |
| 1459497_at   | NA            | NA                                                        | 0.319 | 0.0001754 |
| 1415687_a_at | Psap          | prosaposin                                                | 0.319 | 8.19E-05  |
| 1416362_a_at | Fkbp4         | FK506 binding protein 4                                   | 0.319 | 0.0011171 |
| 1455227_at   | Aadacl1       | arylacetamide deacetylase-like 1                          | 0.320 | 0.000302  |
| 1451199_at   | Qtrtd1        | queuine tRNA-ribosyltransferase domain containing 1       | 0.320 | 0.0003258 |
| 1420846_at   | Mrps2         | mitochondrial ribosomal protein S2                        | 0.320 | 6.75E-05  |
| 1433936_at   | 0610010E21Rik | RIKEN cDNA 0610010E21 gene                                | 0.320 | 0.0001951 |

|              |                    |                                                     |       |           |
|--------------|--------------------|-----------------------------------------------------|-------|-----------|
| 1426163_x_at | Rpl7               | ribosomal protein L7                                | 0.320 | 0.0002302 |
| 1422557_s_at | Mt1                | metallothionein 1                                   | 0.320 | 0.0001551 |
| 1416014_at   | Abce1              | ATP-binding cassette, sub-family E (OABP), member 1 | 0.321 | 9.22E-05  |
| 1438631_x_at | Ttc13              | tetratricopeptide repeat domain 13                  | 0.321 | 9.15E-05  |
| 1443579_s_at | Depdc6             | DEP domain containing 6                             | 0.321 | 0.0023267 |
| 1454778_x_at | Rps28              | ribosomal protein S28                               | 0.321 | 3.89E-05  |
| 1428409_at   | Nat13              | N-acetyltransferase 13                              | 0.321 | 0.0001853 |
| 1420476_a_at | Nap111             | nucleosome assembly protein 1-like 1                | 0.321 | 0.0003518 |
| 1447320_x_at | OTTMUSG00000008305 | predicted gene, OTTMUSG00000008305                  | 0.322 | 5.44E-05  |
| 1452414_s_at | Ccdc86             | coiled-coil domain containing 86                    | 0.322 | 6.00E-05  |
| 1428483_a_at | 2610039C10Rik      | RIKEN cDNA 2610039C10 gene                          | 0.322 | 0.0035425 |
| 1449024_a_at | Hexa               | hexosaminidase A                                    | 0.322 | 0.0002114 |
| 1433567_at   | Gmps               | guanine monophosphate synthetase                    | 0.323 | 5.80E-05  |
| 1429259_a_at | 1190007107Rik      | RIKEN cDNA 1190007107 gene                          | 0.323 | 0.0001156 |
| 1418727_at   | Nup155             | nucleoporin 155                                     | 0.323 | 0.0002575 |
| 1432416_a_at | Npm1               | nucleophosmin 1                                     | 0.324 | 0.0002343 |
| 1437051_at   | Dffb               | DNA fragmentation factor, beta subunit              | 0.324 | 0.000465  |
| 1436822_x_at | ENSMUSG00000066475 | predicted gene, ENSMUSG00000066475                  | 0.324 | 6.39E-05  |



|              |               |                                                       |       |           |
|--------------|---------------|-------------------------------------------------------|-------|-----------|
| 1418564_s_at | Serbp1        | Serpine1 mRNA binding protein 1                       | 0.324 | 3.66E-05  |
| 1450854_at   | Pa2g4         | proliferation-associated 2G4                          | 0.324 | 0.0024326 |
| 1436363_a_at | Nfix          | nuclear factor I/X                                    | 0.324 | 0.000105  |
| 1435081_at   | Sypl          | synaptophysin-like protein                            | 0.324 | 0.0026059 |
| 1415820_x_at | Nono          | non-POU-domain-containing, octamer binding protein    | 0.324 | 4.62E-05  |
| 1416486_at   | Scye1         | small inducible cytokine subfamily E, member 1        | 0.324 | 7.83E-05  |
| 1417947_at   | Pcna          | proliferating cell nuclear antigen                    | 0.324 | 8.22E-05  |
| 1423850_at   | Nsun2         | NOL1/NOP2/Sun domain family member 2                  | 0.325 | 0.0002989 |
| 1416680_at   | Ube3a         | ubiquitin protein ligase E3A                          | 0.325 | 0.0001075 |
| 1455570_x_at | Cnn3          | calponin 3, acidic                                    | 0.325 | 0.0002545 |
| 1423441_at   | Tfb2m         | transcription factor B2, mitochondrial                | 0.325 | 0.0001634 |
| 1427537_at   | Eppk1         | epiplakin 1                                           | 0.325 | 7.61E-05  |
| 1453096_x_at | Rpl27         | ribosomal protein L27                                 | 0.326 | 4.40E-05  |
| 1448569_at   | 2410014A08Rik | RIKEN cDNA 2410014A08 gene                            | 0.326 | 0.0002032 |
| 1423142_a_at | Gtpbp4        | GTP binding protein 4                                 | 0.326 | 5.33E-05  |
| 1417027_at   | Trim2         | tripartite motif-containing 2                         | 0.326 | 0.0001048 |
| 1434011_a_at | Ints5         | integrator complex subunit 5                          | 0.326 | 4.57E-05  |
| 1426854_a_at | LOC100047898  | similar to protein phosphatase 2A inhibitor-2 I-2PP2A | 0.327 | 8.00E-05  |

|              |               |                                                              |       |           |
|--------------|---------------|--------------------------------------------------------------|-------|-----------|
| 1451164_a_at | Mrps18b       | mitochondrial ribosomal protein S18B                         | 0.327 | 0.0012869 |
| 1448739_x_at | Rps18         | ribosomal protein S18                                        | 0.327 | 0.0001369 |
| 1434216_a_at | Nudt19        | nudix (nucleoside diphosphate linked moiety X)-type motif 19 | 0.327 | 7.33E-05  |
| 1437424_at   | Syde2         | synapse defective 1, Rho GTPase, homolog 2 (C. elegans)      | 0.327 | 0.0003812 |
| 1451101_a_at | Rps28         | ribosomal protein S28                                        | 0.328 | 4.16E-05  |
| 1437454_a_at | Txndc14       | thioredoxin domain containing 14                             | 0.328 | 0.0001271 |
| 1416757_at   | Zwilch        | Zwilch, kinetochore associated, homolog (Drosophila)         | 0.328 | 0.0063216 |
| 1415829_at   | Lbr           | lamin B receptor                                             | 0.329 | 0.000133  |
| 1452681_at   | Dtymk         | deoxythymidylate kinase                                      | 0.330 | 0.0007232 |
| 1416037_a_at | Cct2          | chaperonin containing Tcp1, subunit 2 (beta)                 | 0.330 | 9.63E-05  |
| 1435841_s_at | Suclg2        | succinate-Coenzyme A ligase, GDP-forming, beta subunit       | 0.330 | 0.0001521 |
| 1438976_x_at | Mat2a         | methionine adenosyltransferase II, alpha                     | 0.330 | 6.44E-05  |
| 1419700_a_at | Prom1         | prominin 1                                                   | 0.330 | 9.71E-05  |
| 1460506_s_at | Ndufc2        | NADH dehydrogenase (ubiquinone) 1, subcomplex unknown, 2     | 0.330 | 0.0001317 |
| 1424516_at   | B230354K17Rik | RIKEN cDNA B230354K17 gene                                   | 0.330 | 0.0001847 |

|              |               |                                                                |       |           |
|--------------|---------------|----------------------------------------------------------------|-------|-----------|
| 1448777_at   | Mcm2          | minichromosome maintenance deficient 2 mitotin (S. cerevisiae) | 0.331 | 8.83E-05  |
| 1415775_at   | Rbbp7         | retinoblastoma binding protein 7                               | 0.331 | 0.0001153 |
| 1424110_a_at | Nme1          | non-metastatic cells 1, protein (NM23A) expressed in           | 0.331 | 0.0001783 |
| 1452159_at   | 2310001A20Rik | RIKEN cDNA 2310001A20 gene                                     | 0.332 | 0.0004881 |
| 1423701_at   | Coasy         | Coenzyme A synthase                                            | 0.332 | 9.20E-05  |
| 1416068_at   | Kars          | lysyl-tRNA synthetase                                          | 0.332 | 7.47E-05  |
| 1417703_at   | Pvrl2         | poliovirus receptor-related 2                                  | 0.332 | 0.0003073 |
| 1452095_a_at | H47           | histocompatibility 47                                          | 0.333 | 0.0002154 |
| 1430574_at   | Cdkn3         | cyclin-dependent kinase inhibitor 3                            | 0.333 | 6.63E-05  |
| 1456037_x_at | Preb          | prolactin regulatory element binding                           | 0.333 | 0.0002658 |
| 1417852_x_at | Clca1         | chloride channel calcium activated 1                           | 0.334 | 4.86E-05  |
| 1451924_a_at | Edn1          | endothelin 1                                                   | 0.334 | 0.0006535 |
| 1450646_at   | Cyp51         | cytochrome P450, family 51                                     | 0.334 | 6.31E-05  |
| 1437729_at   | Rpl27a        | ribosomal protein L27a                                         | 0.335 | 0.0001378 |
| 1418521_a_at | Mtx1          | metaxin 1                                                      | 0.335 | 9.46E-05  |
| 1428546_at   | Syncrip       | synaptotagmin binding, cytoplasmic RNA interacting protein     | 0.336 | 0.0002875 |

|              |               |                                                                                   |       |           |
|--------------|---------------|-----------------------------------------------------------------------------------|-------|-----------|
| 1426380_at   | Eif4b         | eukaryotic translation initiation factor 4B                                       | 0.336 | 4.74E-05  |
| 1437917_at   | D530037H12Rik | RIKEN cDNA D530037H12 gene                                                        | 0.336 | 6.55E-05  |
| 1423880_at   | D10Wsu52e     | DNA segment, Chr 10, Wayne State University 52, expressed                         | 0.337 | 9.69E-05  |
| 1437828_s_at | Wdr46         | WD repeat domain 46                                                               | 0.337 | 0.0001534 |
| 1428892_at   | Ppil1         | peptidylprolyl isomerase (cyclophilin)-like 1                                     | 0.337 | 0.0037674 |
| 1424828_a_at | Fh1           | fumarate hydratase 1                                                              | 0.337 | 0.0001095 |
| 1456227_x_at | Rbbp7         | retinoblastoma binding protein 7                                                  | 0.337 | 6.74E-05  |
| 1452680_at   | Snrpd2        | small nuclear ribonucleoprotein D2                                                | 0.337 | 0.0002462 |
| 1417274_at   | Snrpa         | small nuclear ribonucleoprotein polypeptide A                                     | 0.337 | 6.23E-05  |
| 1426342_at   | Stt3b         | STT3, subunit of the oligosaccharyltransferase complex, homolog B (S. cerevisiae) | 0.337 | 0.000218  |
| 1422156_a_at | Rps2          | ribosomal protein S2                                                              | 0.337 | 0.0001295 |
| 1436708_x_at | Mcm4          | minichromosome maintenance deficient 4 homolog (S. cerevisiae)                    | 0.337 | 0.0001384 |
| 1423763_x_at | Rps28         | ribosomal protein S28                                                             | 0.338 | 6.32E-05  |
| 1435593_x_at | Rps7          | ribosomal protein S7                                                              | 0.338 | 7.79E-05  |
| 1451470_s_at | Eif5a         | eukaryotic translation initiation factor 5A                                       | 0.338 | 0.0001001 |

|              |               |                                                                  |       |           |
|--------------|---------------|------------------------------------------------------------------|-------|-----------|
| 1437467_at   | Alcam         | activated leukocyte cell adhesion molecule                       | 0.338 | 9.65E-05  |
| 1424300_at   | Gemin6        | gem (nuclear organelle) associated protein 6                     | 0.339 | 0.0003904 |
| 1416336_s_at | Snrpd1        | small nuclear ribonucleoprotein D1                               | 0.339 | 8.08E-05  |
| 1427202_at   | 4833442J19Rik | RIKEN cDNA 4833442J19 gene                                       | 0.339 | 0.0002083 |
| 1448585_at   | Gtf2h4        | general transcription factor II H, polypeptide 4                 | 0.339 | 0.0001802 |
| 1436543_at   | Gtpbp10       | GTP-binding protein 10 (putative)                                | 0.339 | 0.0012927 |
| 1417082_at   | Anp32b        | acidic (leucine-rich) nuclear phosphoprotein 32 family, member B | 0.339 | 0.0001305 |
| 1450873_at   | Gtpbp4        | GTP binding protein 4                                            | 0.340 | 0.0001197 |
| 1417718_at   | Eif3g         | eukaryotic translation initiation factor 3, subunit G            | 0.340 | 7.71E-05  |
| 1415912_a_at | Rps13         | ribosomal protein S13                                            | 0.340 | 0.0001983 |
| 1448122_at   | Tcp1          | t-complex protein 1                                              | 0.340 | 0.0002922 |
| 1423879_at   | D030056L22Rik | RIKEN cDNA D030056L22 gene                                       | 0.340 | 0.0034401 |
| 1448142_x_at | Rps13         | ribosomal protein S13                                            | 0.340 | 0.0003209 |
| 1440285_at   | Ppp1r9a       | protein phosphatase 1, regulatory (inhibitor) subunit 9A         | 0.341 | 0.0002011 |
| 1436705_at   | Tmem32        | transmembrane protein 32                                         | 0.341 | 0.000123  |
| 1428526_at   | Lsm1          | LSM domain containing 1                                          | 0.341 | 0.0007716 |
| 1453118_s_at | Rpl22         | ribosomal protein L22                                            | 0.341 | 7.09E-05  |
| 1452158_at   | Eprs          | glutamyl-prolyl-tRNA synthetase                                  | 0.342 | 7.35E-05  |

|              |                    |                                                 |       |           |
|--------------|--------------------|-------------------------------------------------|-------|-----------|
| 1416585_at   | Ruvb1              | RuvB-like protein 1                             | 0.342 | 0.0003759 |
| 1420365_a_at | Hnrnpa2b1          | heterogeneous nuclear ribonucleoprotein A2/B1   | 0.342 | 0.0002262 |
| 1437327_x_at | Enoph1             | enolase-phosphatase 1                           | 0.342 | 8.39E-05  |
| 1422660_at   | Rbm3               | RNA binding motif protein 3                     | 0.343 | 8.97E-05  |
| 1423050_s_at | Hnrnpu             | heterogeneous nuclear ribonucleoprotein U       | 0.343 | 7.66E-05  |
| 1454704_at   | Scarb2             | scavenger receptor class B, member 2            | 0.343 | 0.0001645 |
| 1416297_s_at | Reg3b              | regenerating islet-derived 3 beta               | 0.343 | 6.66E-05  |
| 1426783_at   | Kat2a              | K(lysine) acetyltransferase 2A                  | 0.343 | 0.0013282 |
| 1434872_x_at | OTTMUSG00000009529 | predicted gene, OTTMUSG00000009529              | 0.343 | 7.34E-05  |
| 1434512_x_at | Sfrs3              | splicing factor, arginine/serine-rich 3 (SRp20) | 0.344 | 0.000862  |
| 1416617_at   | Acss1              | acyl-CoA synthetase short chain family member 1 | 0.344 | 0.0005766 |
| 1416024_x_at | Cct3               | chaperonin containing Tcp1, subunit 3 (gamma)   | 0.344 | 0.000361  |
| 1452048_at   | Mrpl12             | mitochondrial ribosomal protein L12             | 0.344 | 0.0005101 |
| 1452754_at   | Creld2             | cysteine-rich with EGF-like domains 2           | 0.344 | 0.0001558 |
| 1448454_at   | Sfrs6              | splicing factor, arginine/serine-rich 6         | 0.344 | 0.0001071 |
| 1416054_at   | Rps5               | ribosomal protein S5                            | 0.344 | 7.29E-05  |

|              |               |                                                                                               |       |           |
|--------------|---------------|-----------------------------------------------------------------------------------------------|-------|-----------|
| 1420037_at   | Atp5a1        | ATP synthase, H <sup>+</sup> transporting, mitochondrial F1 complex, alpha subunit, isoform 1 | 0.344 | 0.0011652 |
| 1438072_at   | NA            | NA                                                                                            | 0.344 | 0.0006051 |
| 1428624_at   | 2810482I07Rik | RIKEN cDNA 2810482I07 gene                                                                    | 0.345 | 0.0002401 |
| 1425937_a_at | Hexim1        | hexamethylene bis-acetamide inducible 1                                                       | 0.345 | 9.33E-05  |
| 1454834_at   | Nfib          | nuclear factor I/B                                                                            | 0.345 | 0.0007798 |
| 1456308_x_at | Trim28        | tripartite motif-containing 28                                                                | 0.345 | 0.0003419 |
| 1439010_at   | Larp4         | La ribonucleoprotein domain family, member 4                                                  | 0.345 | 0.0006303 |
| 1433507_a_at | LOC100039489  | similar to Hmgn2 protein                                                                      | 0.345 | 0.0002479 |
| 1452676_a_at | Pnpt1         | polyribonucleotide nucleotidyltransferase 1                                                   | 0.345 | 0.0001574 |
| 1422478_a_at | Acss2         | acyl-CoA synthetase short chain family member 2                                               | 0.346 | 0.0002537 |
| 1423211_at   | Nola3         | nucleolar protein family A, member 3                                                          | 0.346 | 0.0001583 |
| 1451249_at   | Trmt1         | TRM1 tRNA methyltransferase 1 homolog (S. cerevisiae)                                         | 0.346 | 0.0005233 |
| 1454993_a_at | Sfrs3         | splicing factor, arginine/serine-rich 3 (SRp20)                                               | 0.346 | 0.0001133 |
| 1433781_a_at | Cldn12        | claudin 12                                                                                    | 0.346 | 0.0001658 |
| 1415914_at   | Hnrnpab       | heterogeneous nuclear ribonucleoprotein A/B                                                   | 0.346 | 0.0002151 |

|              |               |                                                        |       |           |
|--------------|---------------|--------------------------------------------------------|-------|-----------|
| 1418273_a_at | Rpl30         | ribosomal protein L30                                  | 0.347 | 8.68E-05  |
| 1419472_s_at | Nudc          | nuclear distribution gene C homolog (Aspergillus)      | 0.347 | 0.0002299 |
| 1452285_a_at | Eif3f         | eukaryotic translation initiation factor 3, subunit F  | 0.347 | 0.0001046 |
| 1456655_at   | NA            | NA                                                     | 0.347 | 7.30E-05  |
| 1417319_at   | Pvrl3         | poliovirus receptor-related 3                          | 0.347 | 0.0009123 |
| 1415876_a_at | Rps26         | ribosomal protein S26                                  | 0.347 | 9.32E-05  |
| 1450986_at   | Nol5          | nucleolar protein 5                                    | 0.347 | 0.000586  |
| 1435333_at   | 1110007M04Rik | RIKEN cDNA 1110007M04 gene                             | 0.348 | 0.0010101 |
| 1423643_at   | Ddx39         | DEAD (Asp-Glu-Ala-Asp) box polypeptide 39              | 0.348 | 0.0002255 |
| 1419510_at   | Es22          | esterase 22                                            | 0.348 | 0.000973  |
| 1422075_at   | Cdx2          | caudal type homeo box 2                                | 0.348 | 0.000118  |
| 1439266_a_at | Polr3k        | polymerase (RNA) III (DNA directed) polypeptide K      | 0.349 | 0.0002511 |
| 1416030_a_at | Mcm7          | minichromosome maintenance deficient 7 (S. cerevisiae) | 0.349 | 0.0008195 |
| 1435194_at   | Hspa4         | heat shock protein 4                                   | 0.349 | 0.0004385 |
| 1447896_s_at | NA            | NA                                                     | 0.349 | 0.000125  |
| 1416546_a_at | Rpl6          | ribosomal protein L6                                   | 0.349 | 8.86E-05  |
| 1416890_at   | Wdr74         | WD repeat domain 74                                    | 0.349 | 0.0004417 |
| 1450948_a_at | Mrpl1         | mitochondrial ribosomal protein L1                     | 0.349 | 0.0002687 |
| 1416256_a_at | Tubb5         | tubulin, beta 5                                        | 0.349 | 0.000426  |
| 1450339_a_at | Bcl11b        | B-cell leukemia/lymphoma 11B                           | 0.349 | 0.0014322 |



|              |               |                                                                |       |           |
|--------------|---------------|----------------------------------------------------------------|-------|-----------|
| 1417264_at   | Coq5          | coenzyme Q5 homolog, methyltransferase (yeast)                 | 0.350 | 0.0005262 |
| 1452585_at   | Mrps28        | mitochondrial ribosomal protein S28                            | 0.350 | 0.0001549 |
| 1417506_at   | Gmnn          | geminin                                                        | 0.350 | 0.0001359 |
| 1442235_at   | Plagl2        | pleiomorphic adenoma gene-like 2                               | 0.350 | 0.0007028 |
| 1416276_a_at | Rps4x         | ribosomal protein S4, X-linked                                 | 0.350 | 9.25E-05  |
| 1447676_x_at | S100a16       | S100 calcium binding protein A16                               | 0.350 | 0.000181  |
| 1448130_at   | Fdft1         | farnesyl diphosphate farnesyl transferase 1                    | 0.350 | 0.0007845 |
| 1434377_x_at | Rps6          | ribosomal protein S6                                           | 0.350 | 6.70E-05  |
| 1454681_at   | Rbm35a        | RNA binding motif protein 35A                                  | 0.350 | 0.0001017 |
| 1451375_at   | Ehf           | ets homologous factor                                          | 0.350 | 0.0020674 |
| 1422845_at   | Canx          | calnexin                                                       | 0.351 | 0.0018516 |
| 1437032_x_at | Rbm14         | RNA binding motif protein 14                                   | 0.351 | 0.0016547 |
| 1417212_at   | 9530058B02Rik | RIKEN cDNA 9530058B02 gene                                     | 0.351 | 0.0006166 |
| 1428530_x_at | Rps24         | ribosomal protein S24                                          | 0.351 | 0.0001781 |
| 1424488_a_at | Ppa2          | pyrophosphatase (inorganic) 2                                  | 0.352 | 0.0001189 |
| 1438292_x_at | Adk           | adenosine kinase                                               | 0.352 | 0.0001153 |
| 1437908_a_at | Ergic1        | endoplasmic reticulum-golgi intermediate compartment (ERGIC) 1 | 0.352 | 0.0003928 |
| 1421082_s_at | Banf1         | barrier to autointegration factor 1                            | 0.352 | 0.0005011 |

|              |              |                                                                                                   |       |           |
|--------------|--------------|---------------------------------------------------------------------------------------------------|-------|-----------|
| 1452713_a_at | Wdr57        | WD repeat domain 57 (U5 snRNP specific)                                                           | 0.352 | 0.0001709 |
| 1449370_at   | Sox4         | SRY-box containing gene 4                                                                         | 0.352 | 0.0054684 |
| 1437131_x_at | Mrpl11       | mitochondrial ribosomal protein L11                                                               | 0.353 | 0.0015661 |
| 1453722_s_at | LOC100048559 | similar to splicing factor, arginine/serine-rich 1 (splicing factor 2, alternate splicing factor) | 0.353 | 0.0012405 |
| 1436317_at   | Pgap1        | post-GPI attachment to proteins 1                                                                 | 0.353 | 0.0002629 |
| 1416726_s_at | Ube2s        | ubiquitin-conjugating enzyme E2S                                                                  | 0.354 | 0.0004151 |
| 1424344_s_at | Eif1a        | eukaryotic translation initiation factor 1A                                                       | 0.354 | 0.0001515 |
| 1417126_a_at | Rpl22l1      | ribosomal protein L22 like 1                                                                      | 0.354 | 0.0001282 |
| 1431145_a_at | Cuedc2       | CUE domain containing 2                                                                           | 0.354 | 0.0006682 |
| 1452406_x_at | Erdr1        | erythroid differentiation regulator 1                                                             | 0.354 | 0.0016974 |
| 1423080_at   | Tomm20       | translocase of outer mitochondrial membrane 20 homolog (yeast)                                    | 0.354 | 0.0002128 |
| 1437749_s_at | Mrpl9        | mitochondrial ribosomal protein L9                                                                | 0.354 | 9.84E-05  |
| 1416905_at   | Guca2a       | guanylate cyclase activator 2a (guanylin)                                                         | 0.355 | 0.0001966 |
| 1451080_at   | Usp1         | ubiquitin specific peptidase 1                                                                    | 0.355 | 0.0002224 |
| 1454214_a_at | Znhit6       | zinc finger, HIT type 6                                                                           | 0.355 | 0.0005321 |

|              |          |                                                                                             |       |           |
|--------------|----------|---------------------------------------------------------------------------------------------|-------|-----------|
| 1422801_at   | G3bp1    | Ras-GTPase-activating protein SH3-domain binding protein 1                                  | 0.355 | 0.0001366 |
| 1426385_x_at | Ywhae    | tyrosine 3-monooxygenase/tryptophan 5-monooxygenase activation protein, epsilon polypeptide | 0.355 | 8.68E-05  |
| 1433689_s_at | Rps9     | ribosomal protein S9                                                                        | 0.355 | 0.0001232 |
| 1423665_a_at | Rpl5     | ribosomal protein L5                                                                        | 0.356 | 8.63E-05  |
| 1433983_at   | Cnksr3   | Cnksr family member 3                                                                       | 0.356 | 7.84E-05  |
| 1450150_a_at | Rpl13    | ribosomal protein L13                                                                       | 0.356 | 0.0003132 |
| 1427250_at   | Atp2a2   | ATPase, Ca <sup>++</sup> transporting, cardiac muscle, slow twitch 2                        | 0.356 | 0.000216  |
| 1427441_a_at | Suclg2   | succinate-Coenzyme A ligase, GDP-forming, beta subunit                                      | 0.357 | 0.0004365 |
| 1415926_at   | Nup62    | nucleoporin 62                                                                              | 0.357 | 0.0030275 |
| 1450943_at   | Magohb   | mago-nashi homolog B (Drosophila)                                                           | 0.357 | 0.0001981 |
| 1416026_a_at | Rpl12    | ribosomal protein L12                                                                       | 0.357 | 0.0001566 |
| 1433824_x_at | Grsf1    | G-rich RNA sequence binding factor 1                                                        | 0.357 | 0.0001479 |
| 1430367_at   | Stambpl1 | Stam binding protein like 1                                                                 | 0.357 | 0.0012432 |
| 1437333_x_at | Aldh18a1 | aldehyde dehydrogenase 18 family, member A1                                                 | 0.358 | 0.0005314 |
| 1448938_at   | Rpa3     | replication protein A3                                                                      | 0.358 | 0.0007676 |
| 1447166_at   | NA       | NA                                                                                          | 0.358 | 0.0007076 |
| 1416141_a_at | Rps6     | ribosomal protein S6                                                                        | 0.358 | 9.23E-05  |

|              |        |                                                           |       |           |
|--------------|--------|-----------------------------------------------------------|-------|-----------|
| 1428153_at   | Mrps10 | mitochondrial ribosomal protein S10                       | 0.358 | 0.0006848 |
| 1434328_at   | Rpl15  | ribosomal protein L15                                     | 0.358 | 0.0002082 |
| 1416070_a_at | Ddx18  | DEAD (Asp-Glu-Ala-Asp) box polypeptide 18                 | 0.358 | 0.0001109 |
| 1456244_x_at | Glrx3  | glutaredoxin 3                                            | 0.358 | 0.0001224 |
| 1420497_a_at | Cebpz  | CCAAT/enhancer binding protein zeta                       | 0.359 | 0.000654  |
| 1421205_at   | Atm    | ataxia telangiectasia mutated homolog (human)             | 0.359 | 0.0011379 |
| 1449255_a_at | Rpl15  | ribosomal protein L15                                     | 0.359 | 0.0001946 |
| 1416243_a_at | Rpl35  | ribosomal protein L35                                     | 0.359 | 0.0002917 |
| 1439448_x_at | Tmed9  | transmembrane emp24 protein transport domain containing 9 | 0.359 | 0.0003743 |
| 1454890_at   | Amot   | angiomin                                                  | 0.359 | 0.0009232 |
| 1426162_a_at | Rpl7   | ribosomal protein L7                                      | 0.359 | 0.0002112 |
| 1448649_at   | Enpep  | glutamyl aminopeptidase                                   | 0.359 | 0.0001079 |
| 1452398_at   | Plce1  | phospholipase C, epsilon 1                                | 0.359 | 0.0001553 |
| 1455892_x_at | NA     | NA                                                        | 0.359 | 0.0002538 |
| 1449935_a_at | Dnaja3 | DnaJ (Hsp40) homolog, subfamily A, member 3               | 0.360 | 9.72E-05  |
| 1428224_at   | Hnrpd1 | heterogeneous nuclear ribonucleoprotein D-like            | 0.360 | 8.73E-05  |
| 1439421_x_at | Cbx3   | chromobox homolog 3 (Drosophila HP1 gamma)                | 0.360 | 0.0001652 |

|              |               |                                                                        |       |           |
|--------------|---------------|------------------------------------------------------------------------|-------|-----------|
| 1434079_s_at | Mcm2          | minichromosome maintenance deficient 2 mitotin (S. cerevisiae)         | 0.360 | 0.0026705 |
| 1459860_x_at | Trim2         | tripartite motif-containing 2                                          | 0.360 | 0.0001617 |
| 1449940_a_at | Eif2b4        | eukaryotic translation initiation factor 2B, subunit 4 delta           | 0.361 | 0.0001118 |
| 1426645_at   | Hsp90aa1      | heat shock protein 90, alpha (cytosolic), class A member 1             | 0.361 | 0.0009797 |
| 1448258_a_at | Spcs1         | signal peptidase complex subunit 1 homolog (S. cerevisiae)             | 0.361 | 0.0001414 |
| 1428622_at   | Depdc6        | DEP domain containing 6                                                | 0.361 | 0.0003152 |
| 1460680_a_at | Rpl23         | ribosomal protein L23                                                  | 0.361 | 0.0001657 |
| 1453314_x_at | 2610039C10Rik | RIKEN cDNA 2610039C10 gene                                             | 0.361 | 0.0002805 |
| 1429523_a_at | Slc39a5       | solute carrier family 39 (metal ion transporter), member 5             | 0.362 | 0.0040705 |
| 1438322_x_at | Fdft1         | farnesyl diphosphate farnesyl transferase 1                            | 0.362 | 9.85E-05  |
| 1417437_at   | Xrcc6         | X-ray repair complementing defective repair in Chinese hamster cells 6 | 0.362 | 0.00017   |
| 1425048_a_at | Hmgb1         | high mobility group box 1                                              | 0.362 | 0.0016586 |
| 1450704_at   | lhh           | Indian hedgehog                                                        | 0.362 | 0.0012756 |

|              |               |                                                              |       |           |
|--------------|---------------|--------------------------------------------------------------|-------|-----------|
| 1426674_at   | Eif3b         | eukaryotic translation initiation factor 3, subunit B        | 0.362 | 0.0003091 |
| 1417681_at   | Nudt21        | nudix (nucleoside diphosphate linked moiety X)-type motif 21 | 0.363 | 0.0002423 |
| 1435372_a_at | Pa2g4         | proliferation-associated 2G4                                 | 0.363 | 0.0001349 |
| 1450694_at   | Fkbp2         | FK506 binding protein 2                                      | 0.363 | 0.0008516 |
| 1456581_x_at | Gdi2          | guanosine diphosphate (GDP) dissociation inhibitor 2         | 0.363 | 0.000167  |
| 1447432_s_at | Zfp263        | zinc finger protein 263                                      | 0.363 | 0.000501  |
| 1433706_a_at | Ptplad1       | protein tyrosine phosphatase-like A domain containing 1      | 0.364 | 0.0001625 |
| 1437027_x_at | Rnps1         | ribonucleic acid binding protein S1                          | 0.364 | 0.0001463 |
| 1416209_at   | Glud1         | glutamate dehydrogenase 1                                    | 0.364 | 0.0002817 |
| 1416699_at   | 1110008F13Rik | RIKEN cDNA 1110008F13 gene                                   | 0.364 | 0.0005236 |
| 1439553_s_at | Nutf2         | nuclear transport factor 2                                   | 0.364 | 0.0011359 |
| 1418885_a_at | Idh3b         | isocitrate dehydrogenase 3 (NAD+) beta                       | 0.364 | 0.0001872 |
| 1455485_x_at | Rpl13a        | ribosomal protein L13a                                       | 0.364 | 0.0001688 |
| 1448479_at   | Psmc3         | proteasome (prosome, macropain) 26S subunit, non-ATPase, 3   | 0.365 | 0.0015487 |
| 1438505_s_at | Rnasen        | ribonuclease III, nuclear                                    | 0.365 | 0.0004696 |

|              |         |                                                                                                  |       |           |
|--------------|---------|--------------------------------------------------------------------------------------------------|-------|-----------|
| 1418228_at   | Nfu1    | NFU1 iron-sulfur cluster scaffold homolog (S. cerevisiae)                                        | 0.365 | 0.000307  |
| 1421178_at   | Mgat4c  | mannosyl (alpha-1,3)-glycoprotein beta-1,4-N-acetylglucosaminyltransferase, isozyme C (putative) | 0.365 | 0.0009965 |
| 1452198_at   | Fbxl10  | F-box and leucine-rich repeat protein 10                                                         | 0.366 | 0.0009931 |
| 1423284_at   | Mansc1  | MANSC domain containing 1                                                                        | 0.366 | 0.0008854 |
| 1435380_at   | Cox10   | COX10 homolog, cytochrome c oxidase assembly protein, heme A: farnesyltransferase (yeast)        | 0.366 | 0.0008314 |
| 1428112_at   | Armet   | arginine-rich, mutated in early stage tumors                                                     | 0.366 | 0.0003794 |
| 1435817_x_at | Rps6    | ribosomal protein S6                                                                             | 0.366 | 0.000135  |
| 1416404_s_at | Rps16   | ribosomal protein S16                                                                            | 0.366 | 0.0002342 |
| 1439624_at   | Ugt2b35 | UDP glucuronosyltransferase 2 family, polypeptide B35                                            | 0.366 | 0.0001498 |
| 1423521_at   | Lmnb1   | lamin B1                                                                                         | 0.366 | 0.0009054 |
| 1424000_a_at | Rps11   | ribosomal protein S11                                                                            | 0.366 | 0.0001617 |
| 1416595_at   | Mrps22  | mitochondrial ribosomal protein S22                                                              | 0.366 | 0.0017705 |
| 1420489_at   | Mrps14  | mitochondrial ribosomal protein S14                                                              | 0.367 | 0.0013741 |
| 1434748_at   | Ckap2   | cytoskeleton associated protein 2                                                                | 0.367 | 0.0033734 |

|              |          |                                                                 |       |           |
|--------------|----------|-----------------------------------------------------------------|-------|-----------|
| 1424637_s_at | Ccdc47   | coiled-coil domain containing 47                                | 0.367 | 0.0003394 |
| 1451134_a_at | Tm2d2    | TM2 domain containing 2                                         | 0.367 | 0.000894  |
| 1439406_x_at | Fars2    | phenylalanine-tRNA synthetase 2 (mitochondrial)                 | 0.367 | 0.0001981 |
| 1436194_at   | Preli2   | PRELI domain containing 2                                       | 0.367 | 0.0005714 |
| 1416544_at   | Ezh2     | enhancer of zeste homolog 2 (Drosophila)                        | 0.368 | 0.0001692 |
| 1448890_at   | Klf2     | Kruppel-like factor 2 (lung)                                    | 0.368 | 0.0011998 |
| 1450011_at   | Hsd17b12 | hydroxysteroid (17-beta) dehydrogenase 12                       | 0.368 | 0.0008136 |
| 1438723_a_at | Rps10    | ribosomal protein S10                                           | 0.368 | 0.0002639 |
| 1418118_at   | Slc22a1  | solute carrier family 22 (organic cation transporter), member 1 | 0.368 | 0.0005942 |
| 1448286_at   | Hsd17b10 | hydroxysteroid (17-beta) dehydrogenase 10                       | 0.368 | 0.0004522 |
| 1440799_s_at | Farp2    | FERM, RhoGEF and pleckstrin domain protein 2                    | 0.368 | 0.0022366 |
| 1452192_at   | Naf1     | nuclear assembly factor 1 homolog (S. cerevisiae)               | 0.368 | 0.0001656 |
| 1416714_at   | Irf8     | interferon regulatory factor 8                                  | 0.368 | 0.000191  |
| 1428919_at   | Fgfr1op  | Fgfr1 oncogene partner                                          | 0.368 | 0.0002523 |
| 1457139_at   | Auts2    | autism susceptibility candidate 2                               | 0.369 | 0.0003155 |
| 1424843_a_at | Gas5     | growth arrest specific 5                                        | 0.369 | 0.0007148 |



|              |         |                                                                             |       |           |
|--------------|---------|-----------------------------------------------------------------------------|-------|-----------|
| 1454955_at   | Ipo7    | importin 7                                                                  | 0.369 | 0.0004039 |
| 1448809_at   | Cse1l   | chromosome segregation 1-like (S. cerevisiae)                               | 0.369 | 0.0032095 |
| 1438015_at   | Dkc1    | dyskeratosis congenita 1, dyskerin homolog (human)                          | 0.369 | 0.0109028 |
| 1439616_at   | NA      | NA                                                                          | 0.370 | 0.0004861 |
| 1448697_s_at | Rpl36a1 | ribosomal protein L36a-like                                                 | 0.370 | 0.0002492 |
| 1417102_a_at | Ndufb5  | NADH dehydrogenase (ubiquinone) 1 beta subcomplex, 5                        | 0.370 | 0.000129  |
| 1438655_a_at | Rpl34   | ribosomal protein L34                                                       | 0.370 | 0.0001374 |
| 1416065_a_at | Ankrd10 | ankyrin repeat domain 10                                                    | 0.370 | 0.0003122 |
| 1415701_x_at | Rpl23   | ribosomal protein L23                                                       | 0.370 | 0.0001454 |
| 1437377_a_at | Polrmt  | polymerase (RNA) mitochondrial (DNA directed)                               | 0.370 | 0.0004061 |
| 1422623_x_at | Rpl41   | ribosomal protein L41                                                       | 0.370 | 0.000303  |
| 1438386_x_at | Mat2a   | methionine adenosyltransferase II, alpha                                    | 0.370 | 0.0001846 |
| 1428428_at   | Abhd11  | abhydrolase domain containing 11                                            | 0.371 | 0.0001293 |
| 1417150_at   | Slc6a4  | solute carrier family 6 (neurotransmitter transporter, serotonin), member 4 | 0.371 | 0.0002059 |
| 1417273_at   | Pdk4    | pyruvate dehydrogenase kinase, isoenzyme 4                                  | 0.372 | 0.0002141 |
| 1438643_at   | Camk1d  | calcium/calmodulin-dependent protein kinase ID                              | 0.372 | 0.0006103 |

|              |               |                                                |       |           |
|--------------|---------------|------------------------------------------------|-------|-----------|
| 1417062_at   | Armc10        | armadillo repeat containing 10                 | 0.372 | 0.0005243 |
| 1422475_a_at | Rps3a         | ribosomal protein S3a                          | 0.372 | 0.0001544 |
| 1424689_at   | Prss32        | protease, serine, 32                           | 0.373 | 0.0004365 |
| 1456293_s_at | Ccnh          | cyclin H                                       | 0.373 | 0.0003111 |
| 1437279_x_at | Sdc1          | syndecan 1                                     | 0.373 | 0.0002821 |
| 1457141_at   | NA            | NA                                             | 0.373 | 0.000235  |
| 1435177_a_at | Anapc5        | anaphase-promoting complex subunit 5           | 0.373 | 0.0003739 |
| 1423277_at   | Ptprk         | protein tyrosine phosphatase, receptor type, K | 0.373 | 0.0001392 |
| 1429491_s_at | Rif1          | Rap1 interacting factor 1 homolog (yeast)      | 0.373 | 0.0002905 |
| 1418840_at   | Pdcd4         | programmed cell death 4                        | 0.373 | 0.0003185 |
| 1440011_at   | NA            | NA                                             | 0.373 | 0.0001598 |
| 1451348_at   | Depdc6        | DEP domain containing 6                        | 0.374 | 0.0020922 |
| 1418274_at   | Nutf2         | nuclear transport factor 2                     | 0.374 | 0.0028356 |
| 1423666_s_at | Rpl5          | ribosomal protein L5                           | 0.374 | 0.0003697 |
| 1436845_at   | Axin2         | axin2                                          | 0.374 | 0.0092223 |
| 1460037_at   | 2610510H03Rik | RIKEN cDNA 2610510H03 gene                     | 0.375 | 0.0004997 |
| 1460718_s_at | Mtch1         | mitochondrial carrier homolog 1 (C. elegans)   | 0.375 | 0.0057489 |
| 1443088_at   | 9930031P18Rik | RIKEN cDNA 9930031P18 gene                     | 0.375 | 0.0002691 |
| 1421664_a_at | Styx          | serine/threonine/tyrosine interaction protein  | 0.375 | 0.000311  |
| 1453362_x_at | Rps24         | ribosomal protein S24                          | 0.375 | 0.000299  |
| 1455010_at   | 1500012F01Rik | RIKEN cDNA 1500012F01 gene                     | 0.375 | 0.000198  |

|              |              |                                                       |       |           |
|--------------|--------------|-------------------------------------------------------|-------|-----------|
| 1454859_a_at | Rpl23        | ribosomal protein L23                                 | 0.375 | 0.0001505 |
| 1428152_a_at | Rpl18a       | ribosomal protein L18A                                | 0.376 | 0.0002506 |
| 1438239_at   | Mid1         | midline 1                                             | 0.376 | 0.0030573 |
| 1446928_at   | Dnajc17      | DnaJ (Hsp40) homolog, subfamily C, member 17          | 0.376 | 0.000372  |
| 1434523_x_at | Eif3e        | eukaryotic translation initiation factor 3, subunit E | 0.376 | 0.000236  |
| 1438195_at   | Gpd1l        | glycerol-3-phosphate dehydrogenase 1-like             | 0.376 | 0.0005216 |
| 1422884_at   | Snrpd3       | small nuclear ribonucleoprotein D3                    | 0.376 | 0.0020092 |
| 1437192_x_at | Mt2          | metallothionein 2                                     | 0.376 | 0.0001468 |
| 1436856_x_at | Tars2        | threonyl-tRNA synthetase 2, mitochondrial (putative)  | 0.376 | 0.0014307 |
| 1450372_a_at | Rpl18        | ribosomal protein L18                                 | 0.377 | 0.0004117 |
| 1448114_a_at | Htf9c        | HpaII tiny fragments locus 9c                         | 0.377 | 0.0002357 |
| 1457292_at   | Josd3        | Josephin domain containing 3                          | 0.377 | 0.0002492 |
| 1416719_a_at | Rps10        | ribosomal protein S10                                 | 0.377 | 0.000307  |
| 1441536_at   | Hmgcs1       | 3-hydroxy-3-methylglutaryl-Coenzyme A synthase 1      | 0.377 | 0.0011946 |
| 1431980_a_at | As3mt        | arsenic (+3 oxidation state) methyltransferase        | 0.378 | 0.000276  |
| 1448551_a_at | Trim2        | tripartite motif-containing 2                         | 0.378 | 0.0005603 |
| 1437336_x_at | Prickle4     | prickle homolog 4 (Drosophila)                        | 0.378 | 0.0004436 |
| 1433445_x_at | LOC100040592 | similar to Hmgcs1 protein                             | 0.378 | 0.0001492 |
| 1438714_at   | NA           | NA                                                    | 0.378 | 0.0004097 |

|              |               |                                                               |       |           |
|--------------|---------------|---------------------------------------------------------------|-------|-----------|
| 1448622_at   | Lsm4          | LSM4 homolog, U6 small nuclear RNA associated (S. cerevisiae) | 0.378 | 0.0013069 |
| 1423206_s_at | 2310003F16Rik | RIKEN cDNA 2310003F16 gene                                    | 0.379 | 0.0002585 |
| 1440195_at   | Serbp1        | Serpine1 mRNA binding protein 1                               | 0.379 | 0.0047431 |
| 1433913_at   | C80913        | expressed sequence C80913                                     | 0.379 | 0.0014893 |
| 1416949_s_at | Slc39a7       | solute carrier family 39 (zinc transporter), member 7         | 0.379 | 0.0022024 |
| 1427342_at   | Fastkd1       | FAST kinase domains 1                                         | 0.379 | 0.0002361 |
| 1435821_s_at | Ppp1r8        | protein phosphatase 1, regulatory (inhibitor) subunit 8       | 0.379 | 0.0003246 |
| 1416172_at   | Pes1          | pescadillo homolog 1, containing BRCT domain (zebrafish)      | 0.379 | 0.0002417 |
| 1428429_at   | Rgmb          | RGM domain family, member B                                   | 0.379 | 0.0014681 |
| 1429054_at   | Mrpl47        | mitochondrial ribosomal protein L47                           | 0.379 | 0.0007495 |
| 1430147_a_at | Josd3         | Josephin domain containing 3                                  | 0.379 | 0.0005427 |
| 1416277_a_at | Rplp1         | ribosomal protein, large, P1                                  | 0.380 | 0.0003791 |
| 1429822_at   | 4633401B06Rik | RIKEN cDNA 4633401B06 gene                                    | 0.380 | 0.000272  |
| 1426788_a_at | Ssrp1         | structure specific recognition protein 1                      | 0.380 | 0.0006187 |
| 1437709_x_at | Ttc13         | tetratricopeptide repeat domain 13                            | 0.380 | 0.0003968 |
| 1417647_at   | Snx5          | sorting nexin 5                                               | 0.380 | 0.0003614 |

|              |                   |                                                                                                      |       |           |
|--------------|-------------------|------------------------------------------------------------------------------------------------------|-------|-----------|
| 1438510_a_at | Hars              | histidyl-tRNA synthetase                                                                             | 0.380 | 0.0002439 |
| 1428090_at   | Ptcd3             | pentatricopeptide repeat domain 3                                                                    | 0.380 | 0.0004629 |
| 1438250_s_at | OTTMUSG0000006515 | predicted gene, OTTMUSG0000006515                                                                    | 0.380 | 0.0002739 |
| 1419839_x_at | Prpf19            | PRP19/PSO4 pre-mRNA processing factor 19 homolog (S. cerevisiae)                                     | 0.380 | 0.0003059 |
| 1417500_a_at | Tgm2              | transglutaminase 2, C polypeptide                                                                    | 0.380 | 0.0016218 |
| 1441556_at   | NA                | NA                                                                                                   | 0.381 | 0.0006855 |
| 1443814_x_at | Ctsh              | cathepsin H                                                                                          | 0.381 | 0.0003818 |
| 1451980_at   | Casd1             | CAS1 domain containing 1                                                                             | 0.381 | 0.000448  |
| 1448307_at   | Psmg1             | proteasome (prosome, macropain) assembly chaperone 1                                                 | 0.381 | 0.0017333 |
| 1451088_a_at | Oxa1l             | oxidase assembly 1-like                                                                              | 0.381 | 0.0009848 |
| 1452047_at   | Cacybp            | calcyclin binding protein                                                                            | 0.381 | 0.0003374 |
| 1418015_at   | Pum2              | pumilio 2 (Drosophila)                                                                               | 0.381 | 0.0087542 |
| 1416284_at   | Mrpl28            | mitochondrial ribosomal protein L28                                                                  | 0.382 | 0.0010707 |
| 1418449_at   | Lad1              | ladinin                                                                                              | 0.382 | 0.0012114 |
| 1440163_at   | Ccnk              | cyclin K                                                                                             | 0.382 | 0.0005487 |
| 1423564_a_at | Paics             | phosphoribosylaminoimidazole carboxylase, phosphoribosylaminimidazole, succinocarboxamide synthetase | 0.382 | 0.0004387 |

|              |               |                                                                                |       |           |
|--------------|---------------|--------------------------------------------------------------------------------|-------|-----------|
| 1434434_s_at | Tcerg1        | transcription elongation regulator 1 (CA150)                                   | 0.382 | 0.0001929 |
| 1447703_x_at | Zfp593        | zinc finger protein 593                                                        | 0.382 | 0.001166  |
| 1449706_s_at | Nr5a2         | nuclear receptor subfamily 5, group A, member 2                                | 0.383 | 0.0041465 |
| 1455839_at   | Ugcgl1        | UDP-glucose ceramide glucosyltransferase-like 1                                | 0.383 | 0.0006892 |
| 1426722_at   | Slc38a2       | solute carrier family 38, member 2                                             | 0.383 | 0.0002178 |
| 1416181_at   | Mesdc2        | mesoderm development candidate 2                                               | 0.383 | 0.0015971 |
| 1436420_a_at | Ipo4          | importin 4                                                                     | 0.383 | 0.0002235 |
| 1426789_s_at | Ssrp1         | structure specific recognition protein 1                                       | 0.384 | 0.0004206 |
| 1423723_s_at | Tardbp        | TAR DNA binding protein                                                        | 0.384 | 0.0003431 |
| 1417053_at   | Phb           | prohibitin                                                                     | 0.384 | 0.0005711 |
| 1416171_at   | 2310037I24Rik | RIKEN cDNA 2310037I24 gene                                                     | 0.385 | 0.0002373 |
| 1454992_at   | Slc7a1        | solute carrier family 7 (cationic amino acid transporter, y+ system), member 1 | 0.385 | 0.0008045 |
| 1416100_at   | Eif3d         | eukaryotic translation initiation factor 3, subunit D                          | 0.385 | 0.0003635 |
| 1418337_at   | Rpia          | ribose 5-phosphate isomerase A                                                 | 0.385 | 0.0004342 |
| 1415700_a_at | Ssr3          | signal sequence receptor, gamma                                                | 0.385 | 0.0003913 |
| 1415733_a_at | 1110019J04Rik | RIKEN cDNA 1110019J04 gene                                                     | 0.386 | 0.0002433 |

|              |               |                                                                  |       |           |
|--------------|---------------|------------------------------------------------------------------|-------|-----------|
| 1422855_at   | Cpsf3         | cleavage and polyadenylation specificity factor 3                | 0.386 | 0.0002396 |
| 1455988_a_at | LOC100038887  | hypothetical protein<br>LOC100038887                             | 0.386 | 0.0002569 |
| 1417239_at   | Cetn3         | centrin 3                                                        | 0.386 | 0.000701  |
| 1417168_a_at | Usp2          | ubiquitin specific peptidase 2                                   | 0.386 | 0.0003528 |
| 1455384_x_at | D030056L22Rik | RIKEN cDNA D030056L22 gene                                       | 0.386 | 0.0011236 |
| 1423547_at   | Lyz2          | lysozyme 2                                                       | 0.386 | 0.0021088 |
| 1423079_a_at | Tomm20        | translocase of outer mitochondrial membrane 20 homolog (yeast)   | 0.386 | 0.0003119 |
| 1416907_at   | Tsn           | translin                                                         | 0.387 | 0.0004298 |
| 1421083_x_at | Banf1         | barrier to autointegration factor 1                              | 0.387 | 0.0030255 |
| 1451499_at   | Cadps2        | Ca <sup>2+</sup> -dependent activator protein for secretion 2    | 0.387 | 0.0001875 |
| 1435682_at   | Lars2         | leucyl-tRNA synthetase, mitochondrial                            | 0.387 | 0.0001905 |
| 1428296_at   | Polr2l        | polymerase (RNA) II (DNA directed) polypeptide L                 | 0.387 | 0.0010287 |
| 1460008_x_at | Rpl31         | ribosomal protein L31                                            | 0.388 | 0.0001928 |
| 1424980_s_at | Aph1a         | anterior pharynx defective 1a homolog (C. elegans)               | 0.388 | 0.0074697 |
| 1424874_a_at | Ptbp1         | polypyrimidine tract binding protein 1                           | 0.388 | 0.0040994 |
| 1416346_at   | Timm8a1       | translocase of inner mitochondrial membrane 8 homolog a1 (yeast) | 0.388 | 0.0021595 |

|              |                    |                                                                                             |       |           |
|--------------|--------------------|---------------------------------------------------------------------------------------------|-------|-----------|
| 1423278_at   | Ptpk               | protein tyrosine phosphatase, receptor type, K                                              | 0.388 | 0.0002617 |
| 1417657_s_at | Dnajc2             | DnaJ (Hsp40) homolog, subfamily C, member 2                                                 | 0.389 | 0.0004928 |
| 1451254_at   | Ikbkap             | inhibitor of kappa light polypeptide enhancer in B-cells, kinase complex-associated protein | 0.389 | 0.0006813 |
| 1436443_a_at | Kdelc1             | KDEL (Lys-Asp-Glu-Leu) containing 1                                                         | 0.389 | 0.0007039 |
| 1452036_a_at | Tmpo               | thymopoietin                                                                                | 0.389 | 0.0005784 |
| 1423756_s_at | Igfbp4             | insulin-like growth factor binding protein 4                                                | 0.390 | 0.0207204 |
| 1437993_x_at | Qdpr               | quinoid dihydropteridine reductase                                                          | 0.390 | 0.0004332 |
| 1438267_x_at | Rnps1              | ribonucleic acid binding protein S1                                                         | 0.390 | 0.000536  |
| 1426343_at   | Stt3b              | STT3, subunit of the oligosaccharyltransferase complex, homolog B (S. cerevisiae)           | 0.390 | 0.000838  |
| 1459657_s_at | OTTMUSG00000008305 | predicted gene, OTTMUSG00000008305                                                          | 0.391 | 0.0001867 |
| 1415888_at   | Hdgf               | hepatoma-derived growth factor                                                              | 0.391 | 0.0017135 |
| 1452111_at   | Mrps35             | mitochondrial ribosomal protein S35                                                         | 0.391 | 0.0002361 |
| 1435232_x_at | Mrpl15             | mitochondrial ribosomal protein L15                                                         | 0.391 | 0.0002475 |
| 1416108_a_at | Tmed3              | transmembrane emp24 domain containing 3                                                     | 0.391 | 0.0005646 |



|              |               |                                                                                        |       |           |
|--------------|---------------|----------------------------------------------------------------------------------------|-------|-----------|
| 1434145_s_at | Serhl         | serine hydrolase-like                                                                  | 0.391 | 0.0002546 |
| 1419553_a_at | Rabggtb       | RAB geranylgeranyl transferase, b subunit                                              | 0.391 | 0.0002761 |
| 1428500_at   | 2210419D22Rik | RIKEN cDNA 2210419D22 gene                                                             | 0.392 | 0.0002102 |
| 1416901_at   | Npc2          | Niemann Pick type C2                                                                   | 0.392 | 0.0003105 |
| 1434579_x_at | Ndufs8        | NADH dehydrogenase (ubiquinone) Fe-S protein 8                                         | 0.392 | 0.000277  |
| 1444085_at   | Pdss2         | prenyl (solanesyl) diphosphate synthase, subunit 2                                     | 0.392 | 0.0005409 |
| 1423943_at   | Dus1l         | dihydrouridine synthase 1-like (S. cerevisiae)                                         | 0.392 | 0.0020753 |
| 1449506_a_at | Eef1d         | eukaryotic translation elongation factor 1 delta (guanine nucleotide exchange protein) | 0.392 | 0.0006396 |
| 1423600_a_at | Tcof1         | Treacher Collins Franceschetti syndrome 1, homolog                                     | 0.392 | 0.000908  |
| 1439068_at   | Erap1         | endoplasmic reticulum aminopeptidase 1                                                 | 0.392 | 0.0011227 |
| 1450735_at   | Pno1          | partner of NOB1 homolog (S. cerevisiae)                                                | 0.392 | 0.0029932 |
| 1417059_at   | Krtcap2       | keratinocyte associated protein 2                                                      | 0.393 | 0.0030241 |
| 1417830_at   | Smc1a         | structural maintenance of chromosomes 1A                                               | 0.393 | 0.0005713 |
| 1452454_at   | Sdad1         | SDA1 domain containing 1                                                               | 0.393 | 0.0011715 |

|              |               |                                                               |       |           |
|--------------|---------------|---------------------------------------------------------------|-------|-----------|
| 1438984_x_at | Psmb4         | proteasome (prosome, macropain) subunit, beta type 4          | 0.393 | 0.0002152 |
| 1441963_at   | RP23-100C5.8  | ProSAPiP1 protein                                             | 0.393 | 0.001381  |
| 1428158_at   | Akt1s1        | AKT1 substrate 1 (proline-rich)                               | 0.393 | 0.0031241 |
| 1437982_x_at | Cox15         | COX15 homolog, cytochrome c oxidase assembly protein (yeast)  | 0.393 | 0.0003838 |
| 1452774_at   | Hnrnpa3       | heterogeneous nuclear ribonucleoprotein A3                    | 0.393 | 0.000807  |
| 1460168_at   | Slbp          | stem-loop binding protein                                     | 0.394 | 0.0003158 |
| 1434668_at   | Nucks1        | nuclear casein kinase and cyclin-dependent kinase substrate 1 | 0.394 | 0.0003814 |
| 1436247_at   | 4632419I22Rik | RIKEN cDNA 4632419I22 gene                                    | 0.394 | 0.0165943 |
| 1427119_at   | Spink4        | serine peptidase inhibitor, Kazal type 4                      | 0.394 | 0.0004501 |
| 1434766_at   | NA            | NA                                                            | 0.394 | 0.0002235 |
| 1457173_at   | NA            | NA                                                            | 0.394 | 0.0003982 |
| 1438969_x_at | Dhx30         | DEAH (Asp-Glu-Ala-His) box polypeptide 30                     | 0.394 | 0.0002564 |
| 1416859_at   | Fkbp3         | FK506 binding protein 3                                       | 0.394 | 0.0010678 |
| 1433534_a_at | Cct2          | chaperonin containing Tcp1, subunit 2 (beta)                  | 0.394 | 0.0002931 |
| 1417763_at   | Ssr1          | signal sequence receptor, alpha                               | 0.394 | 0.0008269 |
| 1416122_at   | Ccnd2         | cyclin D2                                                     | 0.394 | 0.0004484 |

|              |         |                                                              |       |           |
|--------------|---------|--------------------------------------------------------------|-------|-----------|
| 1437622_x_at | Mrpl28  | mitochondrial ribosomal protein L28                          | 0.395 | 0.0002976 |
| 1456170_x_at | Calr    | calreticulin                                                 | 0.395 | 0.0004403 |
| 1423648_at   | Pdia6   | protein disulfide isomerase associated 6                     | 0.395 | 0.0029466 |
| 1423430_at   | Mybbp1a | MYB binding protein (P160) 1a                                | 0.395 | 0.0036044 |
| 1416152_a_at | Sfrs3   | splicing factor, arginine/serine-rich 3 (SRp20)              | 0.395 | 0.00234   |
| 1436064_x_at | Rps24   | ribosomal protein S24                                        | 0.395 | 0.0003951 |
| 1421821_at   | Ldlr    | low density lipoprotein receptor                             | 0.395 | 0.0004941 |
| 1435017_at   | Cisd3   | CDGSH iron sulfur domain 3                                   | 0.395 | 0.0004624 |
| 1426994_at   | Phlpp   | PH domain and leucine rich repeat protein phosphatase        | 0.396 | 0.0006665 |
| 1455391_at   | Rad23a  | RAD23a homolog (S. cerevisiae)                               | 0.396 | 0.0019283 |
| 1417286_at   | Ndufa5  | NADH dehydrogenase (ubiquinone) 1 alpha subcomplex, 5        | 0.396 | 0.0003721 |
| 1428099_a_at | Sfrs1   | splicing factor, arginine/serine-rich 1 (ASF/SF2)            | 0.396 | 0.0003639 |
| 1417713_at   | Eif2s2  | eukaryotic translation initiation factor 2, subunit 2 (beta) | 0.396 | 0.0011942 |
| 1416177_at   | Rbmxrt  | RNA binding motif protein, X chromosome retrogene            | 0.397 | 0.0005468 |

|              |          |                                                                                              |       |           |
|--------------|----------|----------------------------------------------------------------------------------------------|-------|-----------|
| 1416792_at   | Ppm1g    | protein phosphatase 1G (formerly 2C), magnesium-dependent, gamma isoform                     | 0.397 | 0.0012167 |
| 1429077_x_at | Rpl21    | ribosomal protein L21                                                                        | 0.397 | 0.0002567 |
| 1418529_at   | Osgep    | O-sialoglycoprotein endopeptidase                                                            | 0.397 | 0.0008823 |
| 1426724_at   | Cnn3     | calponin 3, acidic                                                                           | 0.397 | 0.0012518 |
| 1434815_a_at | Mapkapk3 | mitogen-activated protein kinase-activated protein kinase 3                                  | 0.397 | 0.0006862 |
| 1426659_a_at | Rpl23a   | ribosomal protein L23a                                                                       | 0.397 | 0.0006178 |
| 1438839_a_at | Ywhae    | tyrosine 3-monooxygenase /tryptophan 5-monooxygenase activation protein, epsilon polypeptide | 0.397 | 0.0003215 |
| 1431922_at   | Isx      | intestine specific homeobox                                                                  | 0.398 | 0.0003824 |
| 1416214_at   | Mcm4     | minichromosome maintenance deficient 4 homolog (S. cerevisiae)                               | 0.398 | 0.0009119 |
| 1417083_at   | Sec61b   | Sec61 beta subunit                                                                           | 0.398 | 0.0004017 |
| 1437986_x_at | Fuk      | fucokinase                                                                                   | 0.398 | 0.0003483 |
| 1423748_at   | Pdk1     | pyruvate dehydrogenase kinase, isoenzyme 1                                                   | 0.398 | 0.00206   |
| 1448577_x_at | Syngn2   | synaptogyrin 2                                                                               | 0.398 | 0.0018558 |

|              |               |                                                                      |       |           |
|--------------|---------------|----------------------------------------------------------------------|-------|-----------|
| 1452011_a_at | Uxs1          | UDP-glucuronate decarboxylase 1                                      | 0.399 | 0.0013698 |
| 1430000_at   | B230117O15Rik | RIKEN cDNA B230117O15 gene                                           | 0.399 | 0.0046817 |
| 1449348_at   | Mpp6          | membrane protein, palmitoylated 6 (MAGUK p55 subfamily member 6)     | 0.399 | 0.0031227 |
| 1451285_at   | Fus           | fusion, derived from t(12;16) malignant liposarcoma (human)          | 0.399 | 0.0006037 |
| 1424161_at   | Ddx27         | DEAD (Asp-Glu-Ala-Asp) box polypeptide 27                            | 0.399 | 0.0012899 |
| 1433806_x_at | Calr          | calreticulin                                                         | 0.400 | 0.0006665 |
| 1434491_a_at | Cox6c         | cytochrome c oxidase, subunit VIc                                    | 0.400 | 0.0002654 |
| 1456590_x_at | Akr1b3        | aldo-keto reductase family 1, member B3 (aldose reductase)           | 0.400 | 0.0010715 |
| 1434942_at   | Esf1          | ESF1, nucleolar pre-rRNA processing protein, homolog (S. cerevisiae) | 0.400 | 0.0003088 |
| 1441213_at   | BC021891      | cDNA sequence BC021891                                               | 0.400 | 0.0004586 |
| 1416415_a_at | H2afz         | H2A histone family, member Z                                         | 0.401 | 0.0004713 |
| 1443466_s_at | Polr3b        | polymerase (RNA) III (DNA directed) polypeptide B                    | 0.401 | 0.0018908 |
| 1416493_at   | Ddost         | dolichyl-diphosphooligosaccharide-protein glycotransferase           | 0.401 | 0.0074453 |

|              |               |                                                                  |       |           |
|--------------|---------------|------------------------------------------------------------------|-------|-----------|
| 1451175_at   | Spcs3         | signal peptidase complex subunit 3 homolog (S. cerevisiae)       | 0.401 | 0.0003279 |
| 1428159_s_at | Ndufab1       | NADH dehydrogenase (ubiquinone) 1, alpha/beta subcomplex, 1      | 0.401 | 0.0005139 |
| 1435923_at   | Ado           | 2-aminoethanethiol (cysteamine) dioxygenase                      | 0.401 | 0.0007432 |
| 1423855_x_at | Rpl17         | ribosomal protein L17                                            | 0.402 | 0.0003581 |
| 1449635_at   | Prpf19        | PRP19/PSO4 pre-mRNA processing factor 19 homolog (S. cerevisiae) | 0.403 | 0.0009577 |
| 1427129_a_at | Hnrnpr        | heterogeneous nuclear ribonucleoprotein R                        | 0.403 | 0.000368  |
| 1428316_a_at | Fundc2        | FUN14 domain containing 2                                        | 0.403 | 0.0004812 |
| 1428306_at   | Ddit4         | DNA-damage-inducible transcript 4                                | 0.403 | 0.0006388 |
| 1421019_at   | 1700021F05Rik | RIKEN cDNA 1700021F05 gene                                       | 0.403 | 0.0007334 |
| 1416176_at   | Hmgb1         | high mobility group box 1                                        | 0.403 | 0.0005769 |
| 1436760_a_at | Rps8          | ribosomal protein S8                                             | 0.404 | 0.0015406 |
| 1423924_s_at | Tspan14       | tetraspanin 14                                                   | 0.404 | 0.0062855 |
| 1428365_a_at | Lonp1         | lon peptidase 1, mitochondrial                                   | 0.404 | 0.002465  |
| 1428588_a_at | Mrpl41        | mitochondrial ribosomal protein L41                              | 0.404 | 0.0005601 |
| 1427297_at   | Mrpl9         | mitochondrial ribosomal protein L9                               | 0.404 | 0.0003639 |
| 1428797_at   | Setd6         | SET domain containing 6                                          | 0.404 | 0.00175   |

|              |               |                                                                                             |       |           |
|--------------|---------------|---------------------------------------------------------------------------------------------|-------|-----------|
| 1433430_s_at | Cdc23         | CDC23 (cell division cycle 23, yeast, homolog)                                              | 0.404 | 0.0003844 |
| 1452785_at   | 1700034H14Rik | RIKEN cDNA 1700034H14 gene                                                                  | 0.404 | 0.0024123 |
| 1418507_s_at | Socs2         | suppressor of cytokine signaling 2                                                          | 0.404 | 0.0004261 |
| 1454905_at   | Ibtk          | inhibitor of Bruton agammaglobulinemia tyrosine kinase                                      | 0.404 | 0.0029085 |
| 1426384_a_at | Ywhae         | tyrosine 3-monooxygenase/tryptophan 5-monooxygenase activation protein, epsilon polypeptide | 0.405 | 0.0003346 |
| 1428293_at   | 2310022M17Rik | RIKEN cDNA 2310022M17 gene                                                                  | 0.405 | 0.0004053 |
| 1448212_at   | Psmg2         | proteasome (prosome, macropain) assembly chaperone 2                                        | 0.405 | 0.0035101 |
| 1416569_at   | Actl6a        | actin-like 6A                                                                               | 0.405 | 0.0007707 |
| 1417390_at   | Gpn1          | GPN-loop GTPase 1                                                                           | 0.405 | 0.0026839 |
| 1423796_at   | Sfpq          | splicing factor proline/glutamine rich (polypyrimidine tract binding protein associated)    | 0.405 | 0.0010526 |
| 1426797_at   | Tmem209       | transmembrane protein 209                                                                   | 0.405 | 0.0031481 |
| 1448808_a_at | Nme2          | non-metastatic cells 2, protein (NM23B) expressed in                                        | 0.405 | 0.0008702 |
| 1452868_at   | Usp24         | ubiquitin specific peptidase 24                                                             | 0.405 | 0.0011209 |

|              |               |                                                                                  |       |           |
|--------------|---------------|----------------------------------------------------------------------------------|-------|-----------|
| 1438120_x_at | Irak1         | interleukin-1 receptor-associated kinase 1                                       | 0.405 | 0.001035  |
| 1416641_at   | Lig1          | ligase I, DNA, ATP-dependent                                                     | 0.406 | 0.0030952 |
| 1416684_at   | Fbl           | fibrillarlin                                                                     | 0.406 | 0.0023049 |
| 1437624_x_at | Nudt16l1      | nudix (nucleoside diphosphate linked moiety X)-type motif 16-like 1              | 0.406 | 0.0007986 |
| 1416858_a_at | Fkbp3         | FK506 binding protein 3                                                          | 0.406 | 0.0004979 |
| 1457915_at   | 4833442J19Rik | RIKEN cDNA 4833442J19 gene                                                       | 0.406 | 0.0017631 |
| 1418844_at   | Alg9          | asparagine-linked glycosylation 9 homolog (yeast, alpha 1,2 mannosyltransferase) | 0.406 | 0.0021268 |
| 1416984_at   | Mrps18a       | mitochondrial ribosomal protein S18A                                             | 0.406 | 0.0004319 |
| 1452179_at   | Phf17         | PHD finger protein 17                                                            | 0.406 | 0.0003417 |
| 1428666_at   | Nars          | asparaginyl-tRNA synthetase                                                      | 0.407 | 0.001667  |
| 1456573_x_at | Nnt           | nicotinamide nucleotide transhydrogenase                                         | 0.407 | 0.0004385 |
| 1419622_at   | Ugt2b5        | UDP glucuronosyltransferase 2 family, polypeptide B5                             | 0.407 | 0.002739  |
| 1435777_at   | E030018N11Rik | RIKEN cDNA E030018N11 gene                                                       | 0.407 | 0.0014305 |
| 1419912_s_at | Strap         | serine/threonine kinase receptor associated protein                              | 0.407 | 0.0004236 |



|              |          |                                                    |       |           |
|--------------|----------|----------------------------------------------------|-------|-----------|
| 1429306_at   | Lzic     | leucine zipper and CTNNBIP1 domain containing      | 0.407 | 0.0063186 |
| 1417058_a_at | Krtcap2  | keratinocyte associated protein 2                  | 0.407 | 0.0004348 |
| 1418004_a_at | Tmem176b | transmembrane protein 176B                         | 0.408 | 0.0034162 |
| 1438563_s_at | Mrps24   | mitochondrial ribosomal protein S24                | 0.408 | 0.0004396 |
| 1438318_x_at | Ngdn     | neuroguidin, EIF4E binding protein                 | 0.408 | 0.0003553 |
| 1431893_a_at | Pdss1    | prenyl (solanesyl) diphosphate synthase, subunit 1 | 0.408 | 0.0085821 |
| 1435917_at   | Ociad2   | OCIA domain containing 2                           | 0.408 | 0.0031056 |
| 1423465_at   | Frrs1    | ferric-chelate reductase 1                         | 0.409 | 0.000466  |
| 1460323_at   | Tars     | threonyl-tRNA synthetase                           | 0.409 | 0.0004909 |
| 1423087_a_at | Prickle4 | prickle homolog 4 (Drosophila)                     | 0.409 | 0.0034289 |
| 1423617_at   | Pdf      | peptide deformylase (mitochondrial)                | 0.409 | 0.0006362 |
| 1433822_x_at | Anapc5   | anaphase-promoting complex subunit 5               | 0.409 | 0.0005886 |
| 1438156_x_at | Cpt1a    | carnitine palmitoyltransferase 1a, liver           | 0.409 | 0.0009768 |
| 1434025_at   | NA       | NA                                                 | 0.409 | 0.0009277 |
| 1453206_at   | Acad9    | acyl-Coenzyme A dehydrogenase family, member 9     | 0.409 | 0.0007526 |
| 1438560_x_at | Cct4     | chaperonin containing Tcp1, subunit 4 (delta)      | 0.409 | 0.0004055 |
| 1460557_at   | Supv31   | suppressor of var1, 3-like 1 (S. cerevisiae)       | 0.410 | 0.0014612 |

|              |               |                                                                     |       |           |
|--------------|---------------|---------------------------------------------------------------------|-------|-----------|
| 1436801_x_at | Cdc42ep4      | CDC42 effector protein (Rho GTPase binding) 4                       | 0.410 | 0.0012187 |
| 1452725_a_at | Rnaseh2a      | ribonuclease H2, large subunit                                      | 0.410 | 0.004274  |
| 1450423_s_at | Bxdc1         | brix domain containing 1                                            | 0.410 | 0.0028151 |
| 1434173_s_at | D19Bwg1357e   | DNA segment, Chr 19, Brigham & Women@#\$%&s Genetics 1357 expressed | 0.410 | 0.0006821 |
| 1438835_a_at | Eftud2        | elongation factor Tu GTP binding domain containing 2                | 0.410 | 0.0078243 |
| 1426440_at   | Dhrs7         | dehydrogenase/reductase (SDR family) member 7                       | 0.410 | 0.0050931 |
| 1427957_at   | 9530008L14Rik | RIKEN cDNA 9530008L14 gene                                          | 0.410 | 0.0017082 |
| 1424616_s_at | Frag1         | FGF receptor activating protein 1                                   | 0.410 | 0.0004939 |
| 1424200_s_at | Seh1l         | SEH1-like (S. cerevisiae)                                           | 0.411 | 0.0005306 |
| 1437649_x_at | Snx22         | sorting nexin 22                                                    | 0.411 | 0.0003559 |
| 1437975_a_at | Rpl23a        | ribosomal protein L23a                                              | 0.411 | 0.0005622 |
| 1456867_x_at | Ergic3        | ERGIC and golgi 3                                                   | 0.411 | 0.0011883 |
| 1421445_at   | Slc26a3       | solute carrier family 26, member 3                                  | 0.411 | 0.0005531 |
| 1448198_a_at | Ndufb8        | NADH dehydrogenase (ubiquinone) 1 beta subcomplex 8                 | 0.411 | 0.00066   |
| 1416884_at   | Cbx3          | chromobox homolog 3 (Drosophila HP1 gamma)                          | 0.412 | 0.0004271 |

|              |           |                                                                                                              |       |           |
|--------------|-----------|--------------------------------------------------------------------------------------------------------------|-------|-----------|
| 1437621_x_at | Phgdh     | 3-phosphoglycerate dehydrogenase                                                                             | 0.412 | 0.0029237 |
| 1416217_a_at | Rpl37a    | ribosomal protein L37a                                                                                       | 0.412 | 0.0003129 |
| 1418371_at   | Dynll2    | dynein light chain LC8-type 2                                                                                | 0.412 | 0.0005293 |
| 1434047_x_at | Hnrnpa2b1 | heterogeneous nuclear ribonucleoprotein A2/B1                                                                | 0.412 | 0.000544  |
| 1436924_x_at | Rpl31     | ribosomal protein L31                                                                                        | 0.412 | 0.0003394 |
| 1450129_a_at | Socs6     | suppressor of cytokine signaling 6                                                                           | 0.412 | 0.0035104 |
| 1434705_at   | Ctbp2     | C-terminal binding protein 2                                                                                 | 0.412 | 0.0009823 |
| 1435734_x_at | Dus1l     | dihydrouridine synthase 1-like (S. cerevisiae)                                                               | 0.412 | 0.0004085 |
| 1448403_at   | Lars      | leucyl-tRNA synthetase                                                                                       | 0.412 | 0.0005469 |
| 1460201_a_at | Rpl24     | ribosomal protein L24                                                                                        | 0.413 | 0.0005012 |
| 1415950_a_at | Pebp1     | phosphatidylethanolamine binding protein 1                                                                   | 0.413 | 0.0023962 |
| 1428322_a_at | Ndufb10   | NADH dehydrogenase (ubiquinone) 1 beta subcomplex, 10                                                        | 0.413 | 0.0005489 |
| 1418713_at   | Pcbd1     | pterin 4 alpha carbinolamine dehydratase/dimerization cofactor of hepatocyte nuclear factor 1 alpha (TCF1) 1 | 0.413 | 0.0011841 |
| 1418349_at   | Hbegf     | heparin-binding EGF-like growth factor                                                                       | 0.413 | 0.0009814 |

|              |          |                                                                           |       |           |
|--------------|----------|---------------------------------------------------------------------------|-------|-----------|
| 1449090_a_at | Yes1     | Yamaguchi sarcoma viral (v-yes) oncogene homolog 1                        | 0.413 | 0.0005843 |
| 1448230_at   | Usp10    | ubiquitin specific peptidase 10                                           | 0.413 | 0.0013684 |
| 1450054_at   | Add1     | adducin 1 (alpha)                                                         | 0.413 | 0.0012885 |
| 1440120_at   | Gnb2l1   | guanine nucleotide binding protein (G protein), beta polypeptide 2 like 1 | 0.413 | 0.0004905 |
| 1437250_at   | Mreg     | melanoregulin                                                             | 0.413 | 0.0007046 |
| 1433495_at   | Glit25d1 | glycosyltransferase 25 domain containing 1                                | 0.413 | 0.0013538 |
| 1428160_at   | Ndufab1  | NADH dehydrogenase (ubiquinone) 1, alpha/beta subcomplex, 1               | 0.414 | 0.0021212 |
| 1435178_x_at | Anapc5   | anaphase-promoting complex subunit 5                                      | 0.414 | 0.000725  |
| 1423362_at   | Sort1    | sortilin 1                                                                | 0.414 | 0.0008095 |
| 1416657_at   | Akt1     | thymoma viral proto-oncogene 1                                            | 0.415 | 0.0030074 |
| 1448430_a_at | Naca     | nascent polypeptide-associated complex alpha polypeptide                  | 0.415 | 0.0006861 |
| 1449645_s_at | Cct3     | chaperonin containing Tcp1, subunit 3 (gamma)                             | 0.415 | 0.0024536 |
| 1439268_x_at | Eif3e    | eukaryotic translation initiation factor 3, subunit E                     | 0.415 | 0.0005509 |
| 1436615_a_at | Otc      | ornithine transcarbamylase                                                | 0.415 | 0.0004874 |

|              |                        |                                                                                                                         |       |           |
|--------------|------------------------|-------------------------------------------------------------------------------------------------------------------------|-------|-----------|
| 1423205_at   | Tm9sf4                 | transmembrane<br>9 superfamily<br>protein member<br>4                                                                   | 0.415 | 0.0020536 |
| 1440254_at   | 100041277              | predicted gene,<br>100041277                                                                                            | 0.416 | 0.002476  |
| 1424147_at   | Ahsa1                  | AHA1, activator<br>of heat shock<br>protein ATPase<br>homolog 1<br>(yeast)                                              | 0.416 | 0.0011381 |
| 1434091_at   | Faah                   | fatty acid amide<br>hydrolase                                                                                           | 0.416 | 0.0027632 |
| 1452966_at   | Bcl11b                 | B-cell<br>leukemia/lymph<br>oma 11B                                                                                     | 0.416 | 0.0030522 |
| 1433829_a_at | Hnrnpa2b1              | heterogeneous<br>nuclear<br>ribonucleoprotei<br>n A2/B1                                                                 | 0.416 | 0.0003791 |
| 1455904_at   | Gas5                   | growth arrest<br>specific 5                                                                                             | 0.416 | 0.0006937 |
| 1423702_at   | H1f0                   | H1 histone<br>family, member<br>0                                                                                       | 0.417 | 0.0007125 |
| 1415980_at   | Atp5g2                 | ATP synthase,<br>H <sup>+</sup> transporting,<br>mitochondrial F0<br>complex,<br>subunit c<br>(subunit 9),<br>isoform 2 | 0.417 | 0.0018911 |
| 1428212_x_at | ENSMUSG0000<br>0066956 | predicted gene,<br>ENSMUSG0000<br>0066956                                                                               | 0.417 | 0.0004797 |
| 1416536_at   | Mum1                   | melanoma<br>associated<br>antigen<br>(mutated) 1                                                                        | 0.417 | 0.0006827 |
| 1415702_a_at | Ctbp1                  | C-terminal<br>binding protein 1                                                                                         | 0.417 | 0.0009181 |
| 1434824_at   | Baz1b                  | bromodomain<br>adjacent to zinc<br>finger domain,<br>1B                                                                 | 0.417 | 0.0006919 |
| 1431182_at   | Hspa8                  | heat shock<br>protein 8                                                                                                 | 0.417 | 0.0004519 |

|              |                   |                                                                         |       |           |
|--------------|-------------------|-------------------------------------------------------------------------|-------|-----------|
| 1455693_x_at | LOC100043734      | similar to ribosomal protein S6                                         | 0.417 | 0.0003759 |
| 1449415_at   | Chd1l             | chromodomain helicase DNA binding protein 1 like                        | 0.417 | 0.0004952 |
| 1434056_a_at | Ndufb6            | NADH dehydrogenase (ubiquinone) 1 beta subcomplex, 6                    | 0.418 | 0.0005451 |
| 1417380_at   | Iqgap1            | IQ motif containing GTPase activating protein 1                         | 0.418 | 0.0003941 |
| 1456745_x_at | Ergic3            | ERGIC and golgi 3                                                       | 0.418 | 0.0046429 |
| 1429556_at   | 2610024B07Rik     | RIKEN cDNA 2610024B07 gene                                              | 0.418 | 0.003568  |
| 1431177_a_at | OTTMUSG0000022086 | predicted gene, OTTMUSG0000022086                                       | 0.419 | 0.0004702 |
| 1417972_s_at | Pop5              | processing of precursor 5, ribonuclease P/MRP family (S. cerevisiae)    | 0.419 | 0.0017737 |
| 1436113_a_at | St13              | suppression of tumorigenicity 13                                        | 0.419 | 0.0007746 |
| 1453124_at   | Tnpo3             | transportin 3                                                           | 0.419 | 0.0004767 |
| 1430515_s_at | Aasdhppt          | aminoadipate-semialdehyde dehydrogenase-phosphopantetheinyl transferase | 0.419 | 0.0056509 |
| 1437325_x_at | Aldh18a1          | aldehyde dehydrogenase 18 family, member A1                             | 0.420 | 0.0030516 |
| 1423219_a_at | Mrpl49            | mitochondrial ribosomal protein L49                                     | 0.420 | 0.0005135 |
| 1433782_at   | Cldn12            | claudin 12                                                              | 0.420 | 0.0013473 |

|              |               |                                                                                   |       |           |
|--------------|---------------|-----------------------------------------------------------------------------------|-------|-----------|
| 1428100_at   | Sfrs1         | splicing factor, arginine/serine-rich 1 (ASF/SF2)                                 | 0.420 | 0.0006645 |
| 1424052_at   | Thap4         | THAP domain containing 4                                                          | 0.420 | 0.0008291 |
| 1436964_at   | D7Erd715e     | DNA segment, Chr 7, ERATO Doi 715, expressed                                      | 0.421 | 0.0021228 |
| 1453571_at   | Depdc6        | DEP domain containing 6                                                           | 0.421 | 0.0004281 |
| 1434970_a_at | Mrpl15        | mitochondrial ribosomal protein L15                                               | 0.421 | 0.000455  |
| 1416892_s_at | 3110001A13Rik | RIKEN cDNA 3110001A13 gene                                                        | 0.421 | 0.0004005 |
| 1428412_at   | Tm9sf3        | transmembrane 9 superfamily member 3                                              | 0.421 | 0.0007674 |
| 1417161_at   | Cdk2ap2       | CDK2-associated protein 2                                                         | 0.421 | 0.0030868 |
| 1456083_x_at | Eif3c         | eukaryotic translation initiation factor 3, subunit C                             | 0.421 | 0.0005601 |
| 1450841_at   | Stt3a         | STT3, subunit of the oligosaccharyltransferase complex, homolog A (S. cerevisiae) | 0.421 | 0.0053657 |
| 1454669_at   | Tmem11        | transmembrane protein 11                                                          | 0.421 | 0.00213   |
| 1426675_at   | Tomm70a       | translocase of outer mitochondrial membrane 70 homolog A (yeast)                  | 0.421 | 0.0007979 |
| 1426735_at   | Iars2         | isoleucine-tRNA synthetase 2, mitochondrial                                       | 0.422 | 0.0011659 |

|              |               |                                                                                               |       |           |
|--------------|---------------|-----------------------------------------------------------------------------------------------|-------|-----------|
| 1436640_x_at | Agpat4        | 1-acylglycerol-3-phosphate O-acyltransferase 4 (lysophosphatidic acid acyltransferase, delta) | 0.422 | 0.0029274 |
| 1434291_a_at | Serf1         | small EDRK-rich factor 1                                                                      | 0.422 | 0.0065554 |
| 1442214_at   | NA            | NA                                                                                            | 0.422 | 0.0099705 |
| 1451845_a_at | Pthr2         | peptidyl-tRNA hydrolase 2                                                                     | 0.422 | 0.0007027 |
| 1417606_a_at | Calr          | calreticulin                                                                                  | 0.422 | 0.0006321 |
| 1437456_x_at | Ythdf1        | YTH domain family 1                                                                           | 0.422 | 0.0004996 |
| 1415890_at   | Papss1        | 3-adenosine 5-phosphosulfate synthase 1                                                       | 0.423 | 0.0006318 |
| 1416742_at   | Cfdp1         | craniofacial development protein 1                                                            | 0.423 | 0.0006283 |
| 1424077_at   | Gdpd1         | glycerophosphodiester phosphodiesterase domain containing 1                                   | 0.423 | 0.0032322 |
| 1438018_at   | Hook1         | hook homolog 1 (Drosophila)                                                                   | 0.423 | 0.0013687 |
| 1437450_x_at | 2700060E02Rik | RIKEN cDNA 2700060E02 gene                                                                    | 0.423 | 0.0005132 |
| 1428529_at   | 2810026P18Rik | RIKEN cDNA 2810026P18 gene                                                                    | 0.423 | 0.0004237 |
| 1428477_at   | Elac2         | elaC homolog 2 (E. coli)                                                                      | 0.423 | 0.0033022 |
| 1426118_a_at | Tomm40        | translocase of outer mitochondrial membrane 40 homolog (yeast)                                | 0.423 | 0.0176057 |
| 1417352_s_at | Snrpa1        | small nuclear ribonucleoprotein polypeptide A                                                 | 0.423 | 0.0032311 |
| 1417029_a_at | Trim2         | tripartite motif-containing 2                                                                 | 0.423 | 0.0062223 |



|              |               |                                                                      |       |           |
|--------------|---------------|----------------------------------------------------------------------|-------|-----------|
| 1450969_at   | Pccb          | propionyl<br>Coenzyme A<br>carboxylase,<br>beta polypeptide          | 0.423 | 0.0028732 |
| 1437398_a_at | Aldh9a1       | aldehyde<br>dehydrogenase<br>9, subfamily A1                         | 0.423 | 0.0008138 |
| 1416566_at   | Strap         | serine/threonine<br>kinase receptor<br>associated<br>protein         | 0.423 | 0.0007274 |
| 1423662_at   | Atp6ap2       | ATPase, H+<br>transporting,<br>lysosomal<br>accessory<br>protein 2   | 0.423 | 0.0007457 |
| 1439464_s_at | Tex10         | testis expressed<br>gene 10                                          | 0.424 | 0.0009822 |
| 1451331_at   | Ppp1r1b       | protein<br>phosphatase 1,<br>regulatory<br>(inhibitor)<br>subunit 1B | 0.424 | 0.0088898 |
| 1416205_at   | Glb1          | galactosidase,<br>beta 1                                             | 0.424 | 0.0030708 |
| 1427027_a_at | Gtf3a         | general<br>transcription<br>factor III A                             | 0.424 | 0.0007701 |
| 1440715_s_at | Cdkn2aipnl    | CDKN2A<br>interacting<br>protein N-<br>terminal like                 | 0.424 | 0.0018236 |
| 1428029_a_at | H2afv         | H2A histone<br>family, member<br>V                                   | 0.424 | 0.0006905 |
| 1452171_at   | Grwd1         | glutamate-rich<br>WD repeat<br>containing 1                          | 0.424 | 0.0044516 |
| 1449140_at   | Nudcd2        | NudC domain<br>containing 2                                          | 0.424 | 0.0107153 |
| 1417242_at   | Eif4a3        | eukaryotic<br>translation<br>initiation factor<br>4A, isoform 3      | 0.424 | 0.0008272 |
| 1437843_s_at | Nupl1         | nucleoporin like<br>1                                                | 0.425 | 0.0008749 |
| 1440584_at   | 9130221L21Rik | RIKEN cDNA<br>9130221L21<br>gene                                     | 0.425 | 0.0064053 |
| 1439526_at   | NA            | NA                                                                   | 0.425 | 0.0013109 |

|              |               |                                                                       |       |           |
|--------------|---------------|-----------------------------------------------------------------------|-------|-----------|
| 1433447_x_at | Cct4          | chaperonin containing Tcp1, subunit 4 (delta)                         | 0.425 | 0.0006535 |
| 1448290_at   | Reg3b         | regenerating islet-derived 3 beta                                     | 0.425 | 0.0012276 |
| 1456698_s_at | Hnrpd1        | heterogeneous nuclear ribonucleoprotein D-like                        | 0.425 | 0.0016778 |
| 1437984_x_at | Bat1a         | HLA-B-associated transcript 1A                                        | 0.425 | 0.0010668 |
| 1416556_at   | Tspan31       | tetraspanin 31                                                        | 0.425 | 0.0017975 |
| 1428585_at   | Actn1         | actinin, alpha 1                                                      | 0.425 | 0.0008673 |
| 1423649_at   | Tmem68        | transmembrane protein 68                                              | 0.426 | 0.00104   |
| 1438561_x_at | Tmem180       | transmembrane protein 180                                             | 0.426 | 0.0013323 |
| 1438159_x_at | Ndufv2        | NADH dehydrogenase (ubiquinone) flavoprotein 2                        | 0.426 | 0.0020562 |
| 1456547_at   | NA            | NA                                                                    | 0.426 | 0.0021478 |
| 1436995_a_at | Rpl26         | ribosomal protein L26                                                 | 0.426 | 0.0005299 |
| 1416170_at   | Trap1         | TNF receptor-associated protein 1                                     | 0.427 | 0.0017794 |
| 1437511_x_at | Clcc1         | chloride channel CLIC-like 1                                          | 0.427 | 0.0005363 |
| 1434870_at   | 2810004N23Rik | RIKEN cDNA 2810004N23 gene                                            | 0.427 | 0.0024431 |
| 1453728_a_at | Mrps17        | mitochondrial ribosomal protein S17                                   | 0.428 | 0.000801  |
| 1434745_at   | Ccnd2         | cyclin D2                                                             | 0.428 | 0.0008926 |
| 1416972_at   | Nhp211        | NHP2 non-histone chromosome protein 2-like 1 ( <i>S. cerevisiae</i> ) | 0.428 | 0.0005594 |
| 1429984_at   | 5730455O13Rik | RIKEN cDNA 5730455O13 gene                                            | 0.428 | 0.0085281 |
| 1444858_at   | NA            | NA                                                                    | 0.428 | 0.0008817 |

|              |               |                                                                                |       |           |
|--------------|---------------|--------------------------------------------------------------------------------|-------|-----------|
| 1459143_at   | Chchd3        | coiled-coil-helix-coiled-coil-helix domain containing 3                        | 0.428 | 0.0066308 |
| 1436390_a_at | Clcc1         | chloride channel CLIC-like 1                                                   | 0.428 | 0.0008561 |
| 1455643_s_at | Tsr1          | TSR1, 20S rRNA accumulation, homolog (yeast)                                   | 0.428 | 0.0007708 |
| 1416161_at   | Rad21         | RAD21 homolog (S. pombe)                                                       | 0.428 | 0.0005093 |
| 1435810_at   | 5730455O13Rik | RIKEN cDNA 5730455O13 gene                                                     | 0.428 | 0.0023411 |
| 1423321_at   | Myadm         | myeloid-associated differentiation marker                                      | 0.428 | 0.0044645 |
| 1427547_a_at | Slc26a3       | solute carrier family 26, member 3                                             | 0.428 | 0.0017678 |
| 1434744_at   | Yrdc          | yrnC domain containing (E.coli)                                                | 0.428 | 0.0006504 |
| 1423664_at   | Qdpr          | quinoid dihydropteridine reductase                                             | 0.428 | 0.0010865 |
| 1423767_at   | Dpy30         | dpy-30 homolog (C. elegans)                                                    | 0.428 | 0.0009548 |
| 1460171_at   | Cops5         | COP9 (constitutive photomorphogenic) homolog, subunit 5 (Arabidopsis thaliana) | 0.428 | 0.0009738 |
| 1427504_s_at | Sfrs2         | splicing factor, arginine/serine-rich 2 (SC-35)                                | 0.429 | 0.0012982 |
| 1419363_a_at | Mrpl35        | mitochondrial ribosomal protein L35                                            | 0.429 | 0.0016826 |
| 1420622_a_at | Hspa8         | heat shock protein 8                                                           | 0.429 | 0.0009888 |

|              |               |                                                           |       |           |
|--------------|---------------|-----------------------------------------------------------|-------|-----------|
| 1416212_at   | Magoh         | mago-nashi homolog, proliferation-associated (Drosophila) | 0.429 | 0.0007343 |
| 1423754_at   | lfitm3        | interferon induced transmembrane protein 3                | 0.429 | 0.0042188 |
| 1415699_a_at | Gps1          | G protein pathway suppressor 1                            | 0.429 | 0.0011955 |
| 1418655_at   | B4galInt1     | beta-1,4-N-acetyl-galactosaminyl transferase 1            | 0.429 | 0.0043103 |
| 1450903_at   | Rad23b        | RAD23b homolog (S. cerevisiae)                            | 0.429 | 0.0035627 |
| 1438435_at   | Phca          | phytoceramidase, alkaline                                 | 0.429 | 0.0058333 |
| 1423160_at   | Spred1        | sprouty protein with EVH-1 domain 1, related sequence     | 0.430 | 0.0023754 |
| 1454814_s_at | AU021838      | expressed sequence AU021838                               | 0.430 | 0.0005578 |
| 1449004_at   | Mrpl46        | mitochondrial ribosomal protein L46                       | 0.430 | 0.0006574 |
| 1442145_at   | Atp13a3       | ATPase type 13A3                                          | 0.430 | 0.0028444 |
| 1422547_at   | Ranbp1        | RAN binding protein 1                                     | 0.430 | 0.0100539 |
| 1423158_at   | Gnpnat1       | glucosamine-phosphate N-acetyltransferase 1               | 0.430 | 0.0073757 |
| 1441196_at   | C230076A16Rik | RIKEN cDNA C230076A16 gene                                | 0.430 | 0.0009967 |
| 1417615_a_at | Rpl11         | ribosomal protein L11                                     | 0.430 | 0.0013322 |
| 1426669_at   | C530044N13Rik | RIKEN cDNA C530044N13 gene                                | 0.431 | 0.0010407 |
| 1453064_at   | Etaa1         | Ewing@#\$%&s tumor-associated antigen 1                   | 0.431 | 0.0024397 |

|              |                    |                                                                               |       |           |
|--------------|--------------------|-------------------------------------------------------------------------------|-------|-----------|
| 1448517_at   | Timm22             | translocase of inner mitochondrial membrane 22 homolog (yeast)                | 0.431 | 0.0025699 |
| 1452674_a_at | Eif3k              | eukaryotic translation initiation factor 3, subunit K                         | 0.431 | 0.0007886 |
| 1459861_s_at | OTTMUSG00000006609 | predicted gene, OTTMUSG00000006609                                            | 0.431 | 0.000846  |
| 1438291_x_at | OTTMUSG00000009529 | predicted gene, OTTMUSG00000009529                                            | 0.431 | 0.0026362 |
| 1448157_s_at | Rpl10              | ribosomal protein 10                                                          | 0.431 | 0.0005439 |
| 1440816_x_at | Ddx1               | DEAD (Asp-Glu-Ala-Asp) box polypeptide 1                                      | 0.432 | 0.0007762 |
| 1454795_at   | Cobll1             | Cobl-like 1                                                                   | 0.432 | 0.0010659 |
| 1460645_at   | Chordc1            | cysteine and histidine-rich domain (CHORD)-containing, zinc-binding protein 1 | 0.432 | 0.0006384 |
| 1417585_at   | Nup210             | nucleoporin 210                                                               | 0.432 | 0.0030216 |
| 1451015_at   | Tkt                | transketolase                                                                 | 0.432 | 0.0015262 |
| 1433516_a_at | Myeov2             | myeloma overexpressed 2                                                       | 0.432 | 0.0006762 |
| 1446235_at   | BC002199           | cDNA sequence BC002199                                                        | 0.433 | 0.0038143 |
| 1419154_at   | Tmprss2            | transmembrane protease, serine 2                                              | 0.433 | 0.0007187 |
| 1429681_a_at | Gpsn2              | glycoprotein, synaptic 2                                                      | 0.433 | 0.0109034 |
| 1416788_a_at | Idh3g              | isocitrate dehydrogenase 3 (NAD+), gamma                                      | 0.433 | 0.0007146 |

|              |                        |                                                                                  |       |           |
|--------------|------------------------|----------------------------------------------------------------------------------|-------|-----------|
| 1449855_s_at | Uchl3                  | ubiquitin<br>carboxyl-<br>terminal<br>esterase L3<br>(ubiquitin<br>thioesterase) | 0.433 | 0.0010232 |
| 1435791_x_at | ENSMUSG0000<br>0066475 | predicted gene,<br>ENSMUSG0000<br>0066475                                        | 0.433 | 0.000619  |
| 1415754_at   | Polr2f                 | polymerase<br>(RNA) II (DNA<br>directed)<br>polypeptide F                        | 0.434 | 0.0022578 |
| 1417998_at   | Ptges3                 | prostaglandin E<br>synthase 3<br>(cytosolic)                                     | 0.434 | 0.0008153 |
| 1448513_a_at | Npc2                   | Niemann Pick<br>type C2                                                          | 0.434 | 0.0006199 |
| 1415915_at   | Ddx1                   | DEAD (Asp-Glu-<br>Ala-Asp) box<br>polypeptide 1                                  | 0.435 | 0.0011715 |
| 1451177_at   | Dnajb4                 | DnaJ (Hsp40)<br>homolog,<br>subfamily B,<br>member 4                             | 0.435 | 0.0022034 |
| 1418137_at   | Mrp63                  | mitochondrial<br>ribosomal<br>protein 63                                         | 0.435 | 0.0013022 |
| 1452791_at   | Coq2                   | coenzyme Q2<br>homolog,<br>prenyltransferase<br>(yeast)                          | 0.435 | 0.0009812 |
| 1423759_a_at | Tmco1                  | transmembrane<br>and coiled-coil<br>domains 1                                    | 0.436 | 0.0033467 |
| 1420150_at   | Spsb1                  | splA/ryanodine<br>receptor domain<br>and SOCS box<br>containing 1                | 0.436 | 0.0031082 |
| 1448103_s_at | Nono                   | non-POU-<br>domain-<br>containing,<br>octamer binding<br>protein                 | 0.436 | 0.0009822 |
| 1434107_at   | Spata2                 | spermatogenesis<br>associated 2                                                  | 0.436 | 0.0018258 |
| 1448229_s_at | Ccnd2                  | cyclin D2                                                                        | 0.436 | 0.001481  |
| 1416155_at   | Hmgb3                  | high mobility<br>group box 3                                                     | 0.436 | 0.0064821 |

|              |               |                                                                                          |       |           |
|--------------|---------------|------------------------------------------------------------------------------------------|-------|-----------|
| 1423151_at   | Dnajb11       | DnaJ (Hsp40) homolog, subfamily B, member 11                                             | 0.436 | 0.0057771 |
| 1433878_at   | Mrps26        | mitochondrial ribosomal protein S26                                                      | 0.436 | 0.0022151 |
| 1436838_x_at | Cot11         | coactosin-like 1 (Dictyostelium)                                                         | 0.437 | 0.0019346 |
| 1448896_at   | Pigf          | phosphatidylinositol glycan anchor biosynthesis, class F                                 | 0.437 | 0.0011679 |
| 1426555_at   | Scpep1        | serine carboxypeptidase 1                                                                | 0.437 | 0.0097646 |
| 1421969_a_at | Faah          | fatty acid amide hydrolase                                                               | 0.437 | 0.0055731 |
| 1438429_at   | 2610319H10Rik | RIKEN cDNA 2610319H10 gene                                                               | 0.437 | 0.0027503 |
| 1436898_at   | Sfpq          | splicing factor proline/glutamine rich (polypyrimidine tract binding protein associated) | 0.437 | 0.0014917 |
| 1430043_at   | Ttc19         | tetratricopeptide repeat domain 19                                                       | 0.437 | 0.001121  |
| 1417208_at   | Amacr         | alpha-methylacyl-CoA racemase                                                            | 0.437 | 0.0012616 |
| 1434699_at   | 6030408C04Rik | RIKEN cDNA 6030408C04 gene                                                               | 0.437 | 0.0048244 |
| 1452049_at   | Rpl711        | ribosomal protein L7-like 1                                                              | 0.437 | 0.0024587 |
| 1431233_at   | Cnm4          | cyclin M4                                                                                | 0.437 | 0.0056864 |
| 1452671_s_at | Lman1         | lectin, mannose-binding, 1                                                               | 0.437 | 0.0013957 |
| 1428738_a_at | D14Ert449e    | DNA segment, Chr 14, ERATO Doi 449, expressed                                            | 0.437 | 0.010451  |

|              |               |                                                                                          |       |           |
|--------------|---------------|------------------------------------------------------------------------------------------|-------|-----------|
| 1424291_at   | Nup93         | nucleoporin 93                                                                           | 0.438 | 0.0023058 |
| 1416756_at   | Dnajb1        | DnaJ (Hsp40) homolog, subfamily B, member 1                                              | 0.438 | 0.0021915 |
| 1437859_x_at | Eif5a         | eukaryotic translation initiation factor 5A                                              | 0.438 | 0.0035236 |
| 1437706_x_at | Rps14         | ribosomal protein S14                                                                    | 0.438 | 0.0007045 |
| 1440740_at   | Ctdspl2       | CTD (carboxy-terminal domain, RNA polymerase II, polypeptide A) small phosphatase like 2 | 0.438 | 0.0011585 |
| 1447277_s_at | Pcyox1        | prenylcysteine oxidase 1                                                                 | 0.438 | 0.0038809 |
| 1416570_s_at | Gfm1          | G elongation factor, mitochondrial 1                                                     | 0.438 | 0.0011706 |
| 1440354_at   | Elov17        | ELOVL family member 7, elongation of long chain fatty acids (yeast)                      | 0.438 | 0.0110244 |
| 1416948_at   | Mrpl23        | mitochondrial ribosomal protein L23                                                      | 0.439 | 0.0025112 |
| 1428390_at   | Wdr43         | WD repeat domain 43                                                                      | 0.439 | 0.0012632 |
| 1434978_at   | 4933403F05Rik | RIKEN cDNA 4933403F05 gene                                                               | 0.439 | 0.0125349 |
| 1424968_at   | 2210023G05Rik | RIKEN cDNA 2210023G05 gene                                                               | 0.439 | 0.0074717 |
| 1441894_s_at | Grasp         | GRP1 (general receptor for phosphoinositides 1)-associated scaffold protein              | 0.439 | 0.0045638 |



|              |          |                                                                  |       |           |
|--------------|----------|------------------------------------------------------------------|-------|-----------|
| 1451356_at   | Anp32e   | acidic (leucine-rich) nuclear phosphoprotein 32 family, member E | 0.439 | 0.00332   |
| 1426378_at   | Eif4b    | eukaryotic translation initiation factor 4B                      | 0.439 | 0.000989  |
| 1422946_a_at | Dnmt1    | DNA methyltransferase (cytosine-5) 1                             | 0.440 | 0.0129288 |
| 1423747_a_at | Pdk1     | pyruvate dehydrogenase kinase, isoenzyme 1                       | 0.440 | 0.0012663 |
| 1426782_at   | Gpr125   | G protein-coupled receptor 125                                   | 0.440 | 0.0010953 |
| 1416877_a_at | Mrpl51   | mitochondrial ribosomal protein L51                              | 0.440 | 0.0009636 |
| 1456204_at   | Snhg8    | small nucleolar RNA host gene (non-protein coding) 8             | 0.440 | 0.0013058 |
| 1454956_at   | Rps6kb1  | ribosomal protein S6 kinase, polypeptide 1                       | 0.440 | 0.0055439 |
| 1455283_x_at | Ndufs8   | NADH dehydrogenase (ubiquinone) Fe-S protein 8                   | 0.440 | 0.0009141 |
| 1452422_a_at | Snrpb2   | U2 small nuclear ribonucleoprotein B                             | 0.440 | 0.001043  |
| 1457717_at   | AI987986 | expressed sequence AI987986                                      | 0.440 | 0.0062914 |
| 1425196_a_at | Hint2    | histidine triad nucleotide binding protein 2                     | 0.440 | 0.0050901 |
| 1421557_x_at | Txn2     | thioredoxin 2                                                    | 0.440 | 0.0012893 |
| 1438665_at   | Smpd3    | sphingomyelin phosphodiesterase 3, neutral                       | 0.440 | 0.0013656 |

|              |               |                                                                                   |       |           |
|--------------|---------------|-----------------------------------------------------------------------------------|-------|-----------|
| 1456013_x_at | Slc35a4       | solute carrier family 35, member A4                                               | 0.440 | 0.0029212 |
| 1447854_s_at | Hist2h2be     | histone cluster 2, H2be                                                           | 0.440 | 0.0013275 |
| 1456730_x_at | Actl6a        | actin-like 6A                                                                     | 0.441 | 0.0056592 |
| 1452184_at   | Ndufb9        | NADH dehydrogenase (ubiquinone) 1 beta subcomplex, 9                              | 0.441 | 0.0019121 |
| 1428706_at   | Prr6          | proline-rich polypeptide 6                                                        | 0.441 | 0.002806  |
| 1455824_x_at | Stt3a         | STT3, subunit of the oligosaccharyltransferase complex, homolog A (S. cerevisiae) | 0.441 | 0.001656  |
| 1416709_a_at | Ngrn          | neugrin, neurite outgrowth associated                                             | 0.441 | 0.0007744 |
| 1429381_x_at | Igh           | immunoglobulin heavy chain complex                                                | 0.441 | 0.0097898 |
| 1428561_at   | 2610002J23Rik | RIKEN cDNA 2610002J23 gene                                                        | 0.441 | 0.0010197 |
| 1429248_at   | 2810002N01Rik | RIKEN cDNA 2810002N01 gene                                                        | 0.441 | 0.0006752 |
| 1423246_at   | Txndc4        | thioredoxin domain containing 4 (endoplasmic reticulum)                           | 0.441 | 0.0030644 |
| 1435735_x_at | H47           | histocompatibility 47                                                             | 0.441 | 0.0009523 |
| 1428215_x_at | Tomm7         | translocase of outer mitochondrial membrane 7 homolog (yeast)                     | 0.441 | 0.0009775 |
| 1456695_x_at | Anapc5        | anaphase-promoting complex subunit 5                                              | 0.442 | 0.0011164 |
| 1424697_at   | Dtwd1         | DTW domain containing 1                                                           | 0.442 | 0.0036975 |
| 1433736_at   | Hcfc1         | host cell factor C1                                                               | 0.442 | 0.0010659 |

|              |           |                                                                                          |       |           |
|--------------|-----------|------------------------------------------------------------------------------------------|-------|-----------|
| 1457991_at   | NA        | NA                                                                                       | 0.442 | 0.0041963 |
| 1423795_at   | Sfpq      | splicing factor proline/glutamine rich (polypyrimidine tract binding protein associated) | 0.442 | 0.0027973 |
| 1428254_at   | Purb      | purine rich element binding protein B                                                    | 0.443 | 0.0008757 |
| 1419364_a_at | Rps7      | ribosomal protein S7                                                                     | 0.443 | 0.0008736 |
| 1433547_s_at | Nudcd1    | NudC domain containing 1                                                                 | 0.443 | 0.0011316 |
| 1451555_at   | Nln       | neurolysin (metallopeptidase M3 family)                                                  | 0.443 | 0.0007272 |
| 1451989_a_at | Mapre2    | microtubule-associated protein, RP/EB family, member 2                                   | 0.443 | 0.00081   |
| 1435725_x_at | Rpl12     | ribosomal protein L12                                                                    | 0.443 | 0.002142  |
| 1419105_at   | Nr1h4     | nuclear receptor subfamily 1, group H, member 4                                          | 0.443 | 0.0014771 |
| 1420129_s_at | D10Wsu52e | DNA segment, Chr 10, Wayne State University 52, expressed                                | 0.443 | 0.0019743 |
| 1416312_at   | Rars      | arginyl-tRNA synthetase                                                                  | 0.443 | 0.0008584 |
| 1442811_at   | Rgmb      | RGM domain family, member B                                                              | 0.443 | 0.0031788 |
| 1428302_at   | Mrpl48    | mitochondrial ribosomal protein L48                                                      | 0.443 | 0.0055181 |
| 1430053_a_at | Ola1      | Obg-like ATPase 1                                                                        | 0.443 | 0.0033137 |
| 1437280_s_at | Serbp1    | Serpine1 mRNA binding protein 1                                                          | 0.443 | 0.0007432 |
| 1455364_a_at | Rps7      | ribosomal protein S7                                                                     | 0.444 | 0.0022239 |
| 1443231_at   | NA        | NA                                                                                       | 0.444 | 0.0013454 |
| 1422452_at   | Bag3      | BCL2-associated athanogene 3                                                             | 0.444 | 0.0026221 |

|              |         |                                                       |       |           |
|--------------|---------|-------------------------------------------------------|-------|-----------|
| 1454904_at   | Mtm1    | X-linked myotubular myopathy gene 1                   | 0.444 | 0.0205485 |
| 1458409_at   | C86595  | expressed sequence C86595                             | 0.444 | 0.0062301 |
| 1432372_a_at | Spr     | sepiapterin reductase                                 | 0.444 | 0.0008296 |
| 1419583_at   | Cbx4    | chromobox homolog 4 (Drosophila Pc class)             | 0.444 | 0.0065737 |
| 1423223_a_at | Prdx6   | peroxiredoxin 6                                       | 0.444 | 0.001356  |
| 1428557_a_at | Osgepl1 | O-sialoglycoprotein endopeptidase-like 1              | 0.445 | 0.0049936 |
| 1437838_x_at | Grsf1   | G-rich RNA sequence binding factor 1                  | 0.445 | 0.0009926 |
| 1426473_at   | Dnajc9  | DnaJ (Hsp40) homolog, subfamily C, member 9           | 0.445 | 0.0010905 |
| 1418119_at   | Rbm8a   | RNA binding motif protein 8a                          | 0.445 | 0.0012217 |
| 1423295_at   | Tm9sf2  | transmembrane 9 superfamily member 2                  | 0.445 | 0.0017795 |
| 1430020_x_at | Hnrnpa1 | heterogeneous nuclear ribonucleoprotein A1            | 0.445 | 0.0011351 |
| 1448154_at   | Ndrp2   | N-myc downstream regulated gene 2                     | 0.445 | 0.0016933 |
| 1435966_x_at | Mrpl13  | mitochondrial ribosomal protein L13                   | 0.445 | 0.0020025 |
| 1416038_at   | Snd1    | staphylococcal nuclease and tudor domain containing 1 | 0.446 | 0.0180484 |
| 1448677_at   | Cox4nb  | COX4 neighbor                                         | 0.446 | 0.0018346 |
| 1448109_a_at | Rpl26   | ribosomal protein L26                                 | 0.447 | 0.0008519 |

|              |         |                                                                |       |           |
|--------------|---------|----------------------------------------------------------------|-------|-----------|
| 1456209_x_at | NA      | NA                                                             | 0.447 | 0.0139585 |
| 1436762_x_at | Elp3    | elongation protein 3 homolog (S. cerevisiae)                   | 0.447 | 0.0010934 |
| 1452985_at   | Uaca    | uveal autoantigen with coiled-coil domains and ankyrin repeats | 0.447 | 0.000785  |
| 1448536_at   | Lsm3    | LSM3 homolog, U6 small nuclear RNA associated (S. cerevisiae)  | 0.447 | 0.0014225 |
| 1438495_at   | Top1    | topoisomerase (DNA) I                                          | 0.447 | 0.0012142 |
| 1428232_at   | Cpsf6   | cleavage and polyadenylation specific factor 6                 | 0.447 | 0.0009643 |
| 1423741_at   | Rbm10   | RNA binding motif protein 10                                   | 0.447 | 0.0018265 |
| 1424465_at   | Ccdc58  | coiled-coil domain containing 58                               | 0.447 | 0.003502  |
| 1454698_at   | Ptplad1 | protein tyrosine phosphatase-like A domain containing 1        | 0.447 | 0.0011213 |
| 1451140_s_at | Prkag2  | protein kinase, AMP-activated, gamma 2 non-catalytic subunit   | 0.447 | 0.00145   |
| 1442793_s_at | Tbrg4   | transforming growth factor beta regulated gene 4               | 0.447 | 0.0011187 |
| 1437413_x_at | Rps29   | ribosomal protein S29                                          | 0.447 | 0.0007599 |
| 1416755_at   | Dnajb1  | DnaJ (Hsp40) homolog, subfamily B, member 1                    | 0.447 | 0.001142  |
| 1422849_a_at | Pabpn1  | poly(A) binding protein, nuclear 1                             | 0.448 | 0.0028813 |

|              |         |                                                                     |       |           |
|--------------|---------|---------------------------------------------------------------------|-------|-----------|
| 1438462_x_at | Khdrbs1 | KH domain containing, RNA binding, signal transduction associated 1 | 0.448 | 0.0019845 |
| 1452691_at   | Rbm17   | RNA binding motif protein 17                                        | 0.448 | 0.0009437 |
| 1426613_a_at | Snrpb2  | U2 small nuclear ribonucleoprotein B                                | 0.448 | 0.0018902 |
| 1437337_x_at | Fuk     | fucokinase                                                          | 0.448 | 0.0011654 |
| 1453634_a_at | Erp29   | endoplasmic reticulum protein 29                                    | 0.448 | 0.0034881 |
| 1460676_at   | Josd1   | Josephin domain containing 1                                        | 0.449 | 0.0037094 |
| 1434890_at   | Opa1    | optic atrophy 1 homolog (human)                                     | 0.449 | 0.0008183 |
| 1453840_at   | Pabpc1  | poly A binding protein, cytoplasmic 1                               | 0.449 | 0.0011388 |
| 1452838_at   | Ddx10   | DEAD (Asp-Glu-Ala-Asp) box polypeptide 10                           | 0.449 | 0.0019948 |
| 1452257_at   | Bdh1    | 3-hydroxybutyrate dehydrogenase, type 1                             | 0.449 | 0.0014502 |
| 1416099_at   | Rpl27   | ribosomal protein L27                                               | 0.449 | 0.0026395 |
| 1415704_a_at | Cdv3    | carnitine deficiency-associated gene expressed in ventricle 3       | 0.449 | 0.001542  |
| 1416669_s_at | Naca    | nascent polypeptide-associated complex alpha polypeptide            | 0.449 | 0.0010668 |
| 1417663_a_at | Ndr3    | N-myc downstream regulated gene 3                                   | 0.450 | 0.0020368 |

|              |                   |                                                             |       |           |
|--------------|-------------------|-------------------------------------------------------------|-------|-----------|
| 1448283_a_at | Uba2              | ubiquitin-like modifier activating enzyme 2                 | 0.450 | 0.0012036 |
| 1416420_a_at | Rpl9              | ribosomal protein L9                                        | 0.450 | 0.0007967 |
| 1427895_at   | 2310004N24Rik     | RIKEN cDNA 2310004N24 gene                                  | 0.450 | 0.0037878 |
| 1441677_at   | NA                | NA                                                          | 0.450 | 0.0021906 |
| 1434376_at   | Cd44              | CD44 antigen                                                | 0.450 | 0.0020584 |
| 1458341_x_at | NA                | NA                                                          | 0.451 | 0.0015762 |
| 1434986_a_at | Sec61a1           | Sec61 alpha 1 subunit (S. cerevisiae)                       | 0.451 | 0.005338  |
| 1440522_at   | ENSMUSG0000073019 | predicted gene, ENSMUSG0000073019                           | 0.451 | 0.0017848 |
| 1431776_at   | Tob2              | transducer of ERBB2, 2                                      | 0.451 | 0.019146  |
| 1422613_a_at | Rpl7a             | ribosomal protein L7a                                       | 0.451 | 0.0012232 |
| 1424033_at   | Sfrs7             | splicing factor, arginine/serine-rich 7                     | 0.451 | 0.0029058 |
| 1452861_at   | 2010300C02Rik     | RIKEN cDNA 2010300C02 gene                                  | 0.451 | 0.0017604 |
| 1419741_at   | Supt16h           | suppressor of Ty 16 homolog (S. cerevisiae)                 | 0.451 | 0.0033522 |
| 1434386_at   | Atp2c1            | ATPase, Ca <sup>++</sup> -sequestering                      | 0.452 | 0.0063605 |
| 1420930_s_at | Ctnnal1           | catenin (cadherin associated protein), alpha-like 1         | 0.452 | 0.0046812 |
| 1455981_at   | Rps6              | ribosomal protein S6                                        | 0.452 | 0.001315  |
| 1452692_a_at | Ndufv2            | NADH dehydrogenase (ubiquinone) flavoprotein 2              | 0.452 | 0.0008322 |
| 1437085_at   | D630039A03Rik     | RIKEN cDNA D630039A03 gene                                  | 0.452 | 0.0025615 |
| 1452662_a_at | Eif2s1            | eukaryotic translation initiation factor 2, subunit 1 alpha | 0.452 | 0.0044845 |

|              |               |                                                                      |       |           |
|--------------|---------------|----------------------------------------------------------------------|-------|-----------|
| 1416442_at   | Ier2          | immediate early response 2                                           | 0.452 | 0.0030822 |
| 1435855_x_at | Aldh18a1      | aldehyde dehydrogenase 18 family, member A1                          | 0.452 | 0.0042184 |
| 1435369_at   | Ubox5         | U box domain containing 5                                            | 0.452 | 0.0011147 |
| 1438278_a_at | BC003993      | cDNA sequence BC003993                                               | 0.453 | 0.0038531 |
| 1456176_x_at | Slc25a39      | solute carrier family 25, member 39                                  | 0.453 | 0.0012322 |
| 1443881_at   | Pofut1        | protein O-fucosyltransferase 1                                       | 0.453 | 0.0046937 |
| 1434941_s_at | Esf1          | ESF1, nucleolar pre-rRNA processing protein, homolog (S. cerevisiae) | 0.453 | 0.0011969 |
| 1434971_x_at | Mrpl15        | mitochondrial ribosomal protein L15                                  | 0.453 | 0.0022428 |
| 1435008_at   | Slc9a6        | solute carrier family 9 (sodium/hydrogen exchanger), member 6        | 0.453 | 0.0012442 |
| 1428374_at   | Glce          | glucuronyl C5-epimerase                                              | 0.453 | 0.0025849 |
| 1426402_at   | Syncrip       | synaptotagmin binding, cytoplasmic RNA interacting protein           | 0.453 | 0.0030048 |
| 1423727_at   | Cnih          | cornichon homolog (Drosophila)                                       | 0.453 | 0.0022633 |
| 1429599_a_at | 1110019K23Rik | RIKEN cDNA 1110019K23 gene                                           | 0.453 | 0.0053    |
| 1416496_at   | Mrfap1        | Morf4 family associated protein 1                                    | 0.454 | 0.0009225 |
| 1421820_a_at | Nf2           | neurofibromatosis 2                                                  | 0.454 | 0.0046098 |



|              |               |                                                          |       |           |
|--------------|---------------|----------------------------------------------------------|-------|-----------|
| 1433679_at   | Fubp3         | far upstream element (FUSE) binding protein 3            | 0.454 | 0.0014533 |
| 1460672_at   | 2410002F23Rik | RIKEN cDNA 2410002F23 gene                               | 0.454 | 0.0052069 |
| 1459360_at   | NA            | NA                                                       | 0.454 | 0.0024074 |
| 1428619_at   | 2310005N03Rik | RIKEN cDNA 2310005N03 gene                               | 0.454 | 0.0013431 |
| 1452592_at   | Mgst2         | microsomal glutathione S-transferase 2                   | 0.455 | 0.0008792 |
| 1451265_at   | Ccdc115       | coiled-coil domain containing 115                        | 0.455 | 0.0106406 |
| 1456314_x_at | Cdk2ap1       | CDK2 (cyclin-dependent kinase 2)-associated protein 1    | 0.455 | 0.001212  |
| 1430134_a_at | Yars2         | tyrosyl-tRNA synthetase 2 (mitochondrial)                | 0.455 | 0.0052588 |
| 1434390_at   | AI503316      | expressed sequence AI503316                              | 0.455 | 0.0078508 |
| 1452050_at   | Camk1d        | calcium/calmodulin-dependent protein kinase ID           | 0.455 | 0.0025528 |
| 1417287_at   | H13           | histocompatibility 13                                    | 0.456 | 0.0084695 |
| 1416393_at   | Emg1          | EMG1 nucleolar protein homolog (S. cerevisiae)           | 0.456 | 0.0016176 |
| 1433880_at   | Dnajc11       | DnaJ (Hsp40) homolog, subfamily C, member 11             | 0.456 | 0.0059458 |
| 1434842_s_at | Upf3b         | UPF3 regulator of nonsense transcripts homolog B (yeast) | 0.456 | 0.0012193 |

|              |               |                                                            |       |           |
|--------------|---------------|------------------------------------------------------------|-------|-----------|
| 1435509_x_at | LOC100047490  | similar to putative oral cancer suppressor                 | 0.457 | 0.0010179 |
| 1420642_a_at | 2010100O12Rik | RIKEN cDNA 2010100O12 gene                                 | 0.457 | 0.0010566 |
| 1428248_at   | Nfx1          | nuclear transcription factor, X-box binding 1              | 0.457 | 0.0010649 |
| 1428352_at   | Arrdc2        | arrestin domain containing 2                               | 0.457 | 0.0012149 |
| 1423737_at   | Ndufs3        | NADH dehydrogenase (ubiquinone) Fe-S protein 3             | 0.457 | 0.0013225 |
| 1424736_at   | Eef2          | eukaryotic translation elongation factor 2                 | 0.458 | 0.0033891 |
| 1426453_at   | Pitrm1        | pitrilysin metallopeptidase 1                              | 0.458 | 0.0021553 |
| 1448324_at   | Rnps1         | ribonucleic acid binding protein S1                        | 0.458 | 0.0038145 |
| 1457675_at   | 2510002D24Rik | RIKEN cDNA 2510002D24 gene                                 | 0.458 | 0.0040632 |
| 1455046_a_at | Pogz          | pogo transposable element with ZNF domain                  | 0.458 | 0.0010734 |
| 1433480_at   | 2900010J23Rik | RIKEN cDNA 2900010J23 gene                                 | 0.459 | 0.0029601 |
| 1417608_a_at | Rpl13a        | ribosomal protein L13a                                     | 0.459 | 0.0040233 |
| 1417339_a_at | Dynll1        | dynein light chain LC8-type 1                              | 0.459 | 0.0012951 |
| 1427011_a_at | Lancl1        | LanC (bacterial lantibiotic synthetase component C)-like 1 | 0.459 | 0.0012137 |
| 1451049_at   | Bcap31        | B-cell receptor-associated protein 31                      | 0.460 | 0.0033261 |
| 1421950_at   | Pfdn2         | prefoldin 2                                                | 0.460 | 0.0235344 |

|              |               |                                                                                          |       |           |
|--------------|---------------|------------------------------------------------------------------------------------------|-------|-----------|
| 1453111_a_at | Slc25a39      | solute carrier family 25, member 39                                                      | 0.460 | 0.0055726 |
| 1428593_at   | 1700029F09Rik | RIKEN cDNA 1700029F09 gene                                                               | 0.460 | 0.003916  |
| 1435630_s_at | Acat2         | acetyl-Coenzyme A acetyltransferase 2                                                    | 0.460 | 0.0016502 |
| 1454860_x_at | Dad1          | defender against cell death 1                                                            | 0.460 | 0.0021679 |
| 1418512_at   | Stk3          | serine/threonine kinase 3 (Ste20, yeast homolog)                                         | 0.460 | 0.0026591 |
| 1438459_x_at | Sfpq          | splicing factor proline/glutamine rich (polypyrimidine tract binding protein associated) | 0.460 | 0.0012925 |
| 1416751_a_at | Ddx20         | DEAD (Asp-Glu-Ala-Asp) box polypeptide 20                                                | 0.461 | 0.0061072 |
| 1435139_at   | Narg1         | NMDA receptor-regulated gene 1                                                           | 0.461 | 0.0063335 |
| 1427042_at   | Mal2          | mal, T-cell differentiation protein 2                                                    | 0.461 | 0.0020591 |
| 1454760_at   | Htatsf1       | HIV TAT specific factor 1                                                                | 0.461 | 0.0015606 |
| 1417538_at   | Slc35a1       | solute carrier family 35 (CMP-sialic acid transporter), member 1                         | 0.461 | 0.0028858 |
| 1437543_at   | Fubp1         | far upstream element (FUSE) binding protein 1                                            | 0.461 | 0.0017585 |
| 1434688_x_at | Drg1          | developmentally regulated GTP binding protein 1                                          | 0.462 | 0.0012504 |
| 1441477_at   | Calu          | calumenin                                                                                | 0.462 | 0.0072113 |

|              |               |                                                              |       |           |
|--------------|---------------|--------------------------------------------------------------|-------|-----------|
| 1423831_at   | Prkag2        | protein kinase, AMP-activated, gamma 2 non-catalytic subunit | 0.462 | 0.0069268 |
| 1439410_x_at | Slc25a39      | solute carrier family 25, member 39                          | 0.462 | 0.0033292 |
| 1417612_at   | Ier5          | immediate early response 5                                   | 0.462 | 0.0043245 |
| 1442338_at   | NA            | NA                                                           | 0.462 | 0.0017845 |
| 1448542_at   | Bccip         | BRCA2 and CDKN1A interacting protein                         | 0.462 | 0.004078  |
| 1447174_at   | NA            | NA                                                           | 0.463 | 0.0052455 |
| 1448786_at   | 1100001H23Rik | RIKEN cDNA 1100001H23 gene                                   | 0.463 | 0.0010574 |
| 1418128_at   | Adcy6         | adenylate cyclase 6                                          | 0.463 | 0.0014102 |
| 1456542_s_at | Qrsl1         | glutamyl-tRNA synthase (glutamine-hydrolyzing)-like 1        | 0.463 | 0.0012091 |
| 1435127_a_at | Osgepl1       | O-sialoglycoprotein endopeptidase-like 1                     | 0.463 | 0.0027677 |
| 1416850_s_at | Cisd1         | CDGSH iron sulfur domain 1                                   | 0.463 | 0.001338  |
| 1415813_at   | Api5          | apoptosis inhibitor 5                                        | 0.463 | 0.0013221 |
| 1443843_x_at | NA            | NA                                                           | 0.463 | 0.0012993 |
| 1423784_at   | Gars          | glycyl-tRNA synthetase                                       | 0.463 | 0.0013634 |
| 1432332_a_at | Nudt19        | nudix (nucleoside diphosphate linked moiety X)-type motif 19 | 0.463 | 0.0027033 |
| 1433854_at   | Tmem164       | transmembrane protein 164                                    | 0.463 | 0.0159907 |
| 1434120_a_at | Metap2        | methionine aminopeptidase 2                                  | 0.464 | 0.0013136 |

|              |               |                                                               |       |           |
|--------------|---------------|---------------------------------------------------------------|-------|-----------|
| 1452367_at   | Coro2a        | coronin, actin binding protein 2A                             | 0.464 | 0.0020621 |
| 1423839_a_at | Btf3          | basic transcription factor 3                                  | 0.464 | 0.0020215 |
| 1415867_at   | Cct4          | chaperonin containing Tcp1, subunit 4 (delta)                 | 0.464 | 0.0021885 |
| 1417594_at   | Gkap1         | G kinase anchoring protein 1                                  | 0.464 | 0.0124942 |
| 1434732_x_at | Tomm7         | translocase of outer mitochondrial membrane 7 homolog (yeast) | 0.464 | 0.0019398 |
| 1424696_at   | Gpr89         | G protein-coupled receptor 89                                 | 0.464 | 0.001709  |
| 1437565_a_at | Gnl2          | guanine nucleotide binding protein-like 2 (nucleolar)         | 0.464 | 0.0013881 |
| 1422533_at   | Cyp51         | cytochrome P450, family 51                                    | 0.465 | 0.0018232 |
| 1450866_a_at | Mrpl17        | mitochondrial ribosomal protein L17                           | 0.465 | 0.0040114 |
| 1449491_at   | Card10        | caspase recruitment domain family, member 10                  | 0.465 | 0.0041865 |
| 1417530_a_at | Srp9          | signal recognition particle 9                                 | 0.465 | 0.0016126 |
| 1423423_at   | Pdia3         | protein disulfide isomerase associated 3                      | 0.465 | 0.0091452 |
| 1456689_at   | Rnf10         | ring finger protein 10                                        | 0.465 | 0.0031193 |
| 1424075_at   | 9430016H08Rik | RIKEN cDNA 9430016H08 gene                                    | 0.465 | 0.0057383 |
| 1433520_at   | Scap          | SREBF chaperone                                               | 0.465 | 0.004925  |
| 1423811_at   | Sf3a3         | splicing factor 3a, subunit 3                                 | 0.465 | 0.0058045 |

|              |               |                                                             |       |           |
|--------------|---------------|-------------------------------------------------------------|-------|-----------|
| 1423450_a_at | Hs3st1        | heparan sulfate (glucosamine) 3-O-sulfotransferase 1        | 0.465 | 0.0019545 |
| 1423621_a_at | Slc33a1       | solute carrier family 33 (acetyl-CoA transporter), member 1 | 0.466 | 0.0021857 |
| 1438127_at   | LOC552906     | hypothetical LOC552906                                      | 0.466 | 0.001163  |
| 1433457_s_at | Grsf1         | G-rich RNA sequence binding factor 1                        | 0.466 | 0.0031511 |
| 1449773_s_at | Gadd45b       | growth arrest and DNA-damage-inducible 45 beta              | 0.466 | 0.0051194 |
| 1420488_at   | Mrps14        | mitochondrial ribosomal protein S14                         | 0.466 | 0.0082869 |
| 1423760_at   | Cd44          | CD44 antigen                                                | 0.467 | 0.0057338 |
| 1448148_at   | Grn           | granulin                                                    | 0.467 | 0.0019031 |
| 1450880_at   | Mrpl16        | mitochondrial ribosomal protein L16                         | 0.467 | 0.0028496 |
| 1448102_a_at | Wdr61         | WD repeat domain 61                                         | 0.467 | 0.0019823 |
| 1434823_x_at | Myeov2        | myeloma overexpressed 2                                     | 0.467 | 0.0013497 |
| 1436586_x_at | Rps14         | ribosomal protein S14                                       | 0.467 | 0.0013302 |
| 1431510_s_at | Cmc1          | COX assembly mitochondrial protein homolog (S. cerevisiae)  | 0.467 | 0.0019323 |
| 1455323_at   | Rbak          | RB-associated KRAB repressor                                | 0.467 | 0.0074612 |
| 1424045_at   | 5730437N04Rik | RIKEN cDNA 5730437N04 gene                                  | 0.467 | 0.0036548 |
| 1424366_at   | Dolk          | dolichol kinase                                             | 0.467 | 0.0046508 |
| 1436034_at   | Cep68         | centrosomal protein 68                                      | 0.467 | 0.0119378 |

|              |               |                                                      |       |           |
|--------------|---------------|------------------------------------------------------|-------|-----------|
| 1450133_at   | Ugt2a3        | UDP glucuronosyltransferase 2 family, polypeptide A3 | 0.467 | 0.0047477 |
| 1435485_at   | C230096C10Rik | RIKEN cDNA C230096C10 gene                           | 0.467 | 0.0053715 |
| 1423264_at   | Bop1          | block of proliferation 1                             | 0.468 | 0.0023585 |
| 1449480_at   | Sap18         | Sin3-associated polypeptide 18                       | 0.468 | 0.004747  |
| 1426744_at   | Srebf2        | sterol regulatory element binding factor 2           | 0.468 | 0.0032845 |
| 1448176_a_at | Hnrnpk        | heterogeneous nuclear ribonucleoprotein K            | 0.468 | 0.0017557 |
| 1427981_a_at | Csad          | cysteine sulfinic acid decarboxylase                 | 0.468 | 0.0054178 |
| 1424517_at   | Ccdc12        | coiled-coil domain containing 12                     | 0.468 | 0.0223863 |
| 1455546_s_at | Sf3a2         | splicing factor 3a, subunit 2                        | 0.468 | 0.0039456 |
| 1424136_a_at | Ppih          | peptidyl prolyl isomerase H                          | 0.468 | 0.0097554 |
| 1424370_s_at | Psmf1         | proteasome (prosome, macropain) inhibitor subunit 1  | 0.468 | 0.0067178 |
| 1422500_at   | ldh3a         | isocitrate dehydrogenase 3 (NAD+) alpha              | 0.468 | 0.0229236 |
| 1433799_at   | Rdh13         | retinol dehydrogenase 13 (all-trans and 9-cis)       | 0.468 | 0.0072826 |
| 1450848_at   | Dap3          | death associated protein 3                           | 0.468 | 0.0012317 |
| 1434977_at   | 4933403F05Rik | RIKEN cDNA 4933403F05 gene                           | 0.468 | 0.0182979 |
| 1417684_at   | Thumpd3       | THUMP domain containing 3                            | 0.468 | 0.001672  |

|              |         |                                                              |       |           |
|--------------|---------|--------------------------------------------------------------|-------|-----------|
| 1420679_a_at | Aig1    | androgen-induced 1                                           | 0.468 | 0.0039188 |
| 1429809_at   | Tmtc2   | transmembrane and tetratricopeptide repeat containing 2      | 0.468 | 0.0033205 |
| 1417138_s_at | Polr2e  | polymerase (RNA) II (DNA directed) polypeptide E             | 0.469 | 0.0028166 |
| 1452146_a_at | Cox15   | COX15 homolog, cytochrome c oxidase assembly protein (yeast) | 0.469 | 0.0023379 |
| 1434972_x_at | Sfrs1   | splicing factor, arginine/serine-rich 1 (ASF/SF2)            | 0.469 | 0.0025772 |
| 1434548_at   | Serinc3 | serine incorporator 3                                        | 0.469 | 0.0017471 |
| 1416928_at   | Rbm12   | RNA binding motif protein 12                                 | 0.469 | 0.0016982 |
| 1416766_at   | Mosc2   | MOCO sulphurase C-terminal domain containing 2               | 0.470 | 0.0023394 |
| 1416910_at   | Dnajc15 | DnaJ (Hsp40) homolog, subfamily C, member 15                 | 0.470 | 0.0023502 |
| 1437916_at   | NA      | NA                                                           | 0.470 | 0.0295995 |
| 1425494_s_at | Bmpr1a  | bone morphogenetic protein receptor, type 1A                 | 0.470 | 0.0019686 |
| 1450894_a_at | Ap2m1   | adaptor protein complex AP-2, mu1                            | 0.470 | 0.0044145 |
| 1455550_x_at | Serinc3 | serine incorporator 3                                        | 0.470 | 0.0012604 |
| 1434437_x_at | Rrm2    | ribonucleotide reductase M2                                  | 0.471 | 0.005353  |
| 1428244_at   | Larp1   | La ribonucleoprotein domain family, member 1                 | 0.471 | 0.002229  |



|              |               |                                                                                                   |       |           |
|--------------|---------------|---------------------------------------------------------------------------------------------------|-------|-----------|
| 1425498_at   | Prpf4b        | PRP4 pre-mRNA processing factor 4 homolog B (yeast)                                               | 0.471 | 0.0015715 |
| 1423416_at   | Smarcc1       | SWI/SNF related, matrix associated, actin dependent regulator of chromatin, subfamily c, member 1 | 0.471 | 0.0016625 |
| 1448344_at   | Rps12         | ribosomal protein S12                                                                             | 0.471 | 0.0093729 |
| 1454971_x_at | Tsc22d1       | TSC22 domain family, member 1                                                                     | 0.471 | 0.0018586 |
| 1451068_s_at | Rps25         | ribosomal protein S25                                                                             | 0.471 | 0.0021128 |
| 1427990_at   | Usp45         | ubiquitin specific peptidase 45                                                                   | 0.471 | 0.0043151 |
| 1417929_at   | Slc7a8        | solute carrier family 7 (cationic amino acid transporter, y+ system), member 8                    | 0.471 | 0.0132871 |
| 1426709_a_at | Usp33         | ubiquitin specific peptidase 33                                                                   | 0.472 | 0.0023965 |
| 1428554_a_at | 1810035L17Rik | RIKEN cDNA 1810035L17 gene                                                                        | 0.472 | 0.0027519 |
| 1439438_a_at | EG625193      | predicted gene, EG625193                                                                          | 0.472 | 0.0013321 |
| 1424545_at   | BC003965      | cDNA sequence BC003965                                                                            | 0.472 | 0.0021982 |
| 1424266_s_at | AU018778      | expressed sequence AU018778                                                                       | 0.472 | 0.003233  |
| 1428795_at   | 1110021L09Rik | RIKEN cDNA 1110021L09 gene                                                                        | 0.472 | 0.0019577 |
| 1416557_a_at | Eftud2        | elongation factor Tu GTP binding domain containing 2                                              | 0.472 | 0.0020256 |

|              |                    |                                                                    |       |           |
|--------------|--------------------|--------------------------------------------------------------------|-------|-----------|
| 1423982_at   | Fusip1             | FUS interacting protein (serine-arginine rich) 1                   | 0.472 | 0.0037798 |
| 1417344_at   | 2900064A13Rik      | RIKEN cDNA 2900064A13 gene                                         | 0.472 | 0.0023416 |
| 1417075_at   | 2010309E21Rik      | RIKEN cDNA 2010309E21 gene                                         | 0.473 | 0.0074712 |
| 1440536_at   | NA                 | NA                                                                 | 0.473 | 0.0169021 |
| 1451296_x_at | Pabpc4             | poly A binding protein, cytoplasmic 4                              | 0.473 | 0.0022455 |
| 1456236_s_at | Commd10            | COMM domain containing 10                                          | 0.473 | 0.0020052 |
| 1427875_a_at | ENSMUSG00000068396 | predicted gene, ENSMUSG00000068396                                 | 0.473 | 0.0021961 |
| 1437164_x_at | Atp5o              | ATP synthase, H+ transporting, mitochondrial F1 complex, O subunit | 0.473 | 0.00214   |
| 1427965_at   | Ssbp1              | single-stranded DNA binding protein 1                              | 0.473 | 0.0106272 |
| 1434317_s_at | Tex10              | testis expressed gene 10                                           | 0.474 | 0.0015339 |
| 1423455_at   | ENSMUSG00000068659 | predicted gene, ENSMUSG00000068659                                 | 0.474 | 0.0052201 |
| 1417966_at   | Mrpl39             | mitochondrial ribosomal protein L39                                | 0.474 | 0.0021037 |
| 1456253_s_at | Plekhn1            | pleckstrin homology domain containing, family N member 1           | 0.474 | 0.0057741 |
| 1450699_at   | Selenbp1           | selenium binding protein 1                                         | 0.474 | 0.0039433 |
| 1426015_s_at | Asph               | aspartate-beta-hydroxylase                                         | 0.474 | 0.0038249 |
| 1435733_x_at | Rnaseh2c           | ribonuclease H2, subunit C                                         | 0.474 | 0.0055821 |

|              |               |                                                      |       |           |
|--------------|---------------|------------------------------------------------------|-------|-----------|
| 1450690_at   | Ranbp2        | RAN binding protein 2                                | 0.475 | 0.0032834 |
| 1447754_x_at | Thap4         | THAP domain containing 4                             | 0.475 | 0.0034398 |
| 1450911_at   | Ppib          | peptidylprolyl isomerase B                           | 0.475 | 0.0030658 |
| 1423684_at   | Hnrnpk        | heterogeneous nuclear ribonucleoprotein K            | 0.475 | 0.0019849 |
| 1440925_at   | NA            | NA                                                   | 0.475 | 0.0096554 |
| 1427131_s_at | Lrrc58        | leucine rich repeat containing 58                    | 0.475 | 0.0041953 |
| 1423818_a_at | Arl6ip1       | ADP-ribosylation factor-like 6 interacting protein 1 | 0.475 | 0.005032  |
| 1448641_at   | Mbtd1         | mbt domain containing 1                              | 0.475 | 0.0020063 |
| 1452782_a_at | Txn2          | thioredoxin 2                                        | 0.475 | 0.006407  |
| 1430717_at   | 4930403C10Rik | RIKEN cDNA 4930403C10 gene                           | 0.476 | 0.0032647 |
| 1415807_s_at | Sfrs2         | splicing factor, arginine/serine-rich 2 (SC-35)      | 0.476 | 0.0015469 |
| 1416906_at   | Anapc5        | anaphase-promoting complex subunit 5                 | 0.476 | 0.0109482 |
| 1448238_at   | 2700060E02Rik | RIKEN cDNA 2700060E02 gene                           | 0.476 | 0.0016867 |
| 1415817_s_at | Cct7          | chaperonin containing Tcp1, subunit 7 (eta)          | 0.476 | 0.0052821 |
| 1424383_at   | Tmem51        | transmembrane protein 51                             | 0.477 | 0.0020743 |
| 1416509_at   | Tm9sf3        | transmembrane 9 superfamily member 3                 | 0.477 | 0.0031727 |
| 1448791_at   | Snx5          | sorting nexin 5                                      | 0.478 | 0.0016937 |

|              |         |                                                                                                   |       |           |
|--------------|---------|---------------------------------------------------------------------------------------------------|-------|-----------|
|              |         | SWI/SNF related, matrix associated, actin dependent regulator of chromatin, subfamily b, member 1 |       |           |
| 1416045_a_at | Smarcb1 |                                                                                                   | 0.478 | 0.0027578 |
| 1441479_at   | NA      | NA                                                                                                | 0.478 | 0.0032969 |
| 1451229_at   | Hdac11  | histone deacetylase 11                                                                            | 0.478 | 0.012707  |
| 1449363_at   | Atf3    | activating transcription factor 3                                                                 | 0.478 | 0.0075352 |
| 1448802_at   | Nufip1  | nuclear fragile X mental retardation protein interacting protein 1                                | 0.478 | 0.0028039 |
| 1419638_at   | Efnb2   | ephrin B2                                                                                         | 0.478 | 0.0039624 |
| 1416251_at   | Mcm6    | minichromosome maintenance deficient 6 (MIS5 homolog, S. pombe) (S. cerevisiae)                   | 0.478 | 0.0023356 |
| 1452052_s_at | Eif3j   | eukaryotic translation initiation factor 3, subunit J                                             | 0.478 | 0.002444  |
| 1448589_at   | Ndufb5  | NADH dehydrogenase (ubiquinone) 1 beta subcomplex, 5                                              | 0.478 | 0.0060163 |
| 1429254_at   | Aqp11   | aquaporin 11                                                                                      | 0.478 | 0.0067395 |
| 1448166_a_at | Psmb1   | proteasome (prosome, macropain) subunit, beta type 1                                              | 0.478 | 0.0016562 |
| 1448586_at   | Hspa14  | heat shock protein 14                                                                             | 0.479 | 0.0050182 |
| 1426643_at   | Elp3    | elongation protein 3 homolog (S. cerevisiae)                                                      | 0.479 | 0.0023181 |
| 1415979_x_at | Rpl7    | ribosomal protein L7                                                                              | 0.479 | 0.0017212 |

|              |        |                                                                                     |       |           |
|--------------|--------|-------------------------------------------------------------------------------------|-------|-----------|
| 1456955_at   | NA     | NA                                                                                  | 0.479 | 0.0037452 |
| 1440220_at   | NA     | NA                                                                                  | 0.479 | 0.0089953 |
| 1415858_at   | Eif3c  | eukaryotic translation initiation factor 3, subunit C                               | 0.479 | 0.002807  |
| 1418624_at   | Ybx1   | Y box protein 1                                                                     | 0.479 | 0.0028652 |
| 1421267_a_at | Cited2 | Cbp/p300-interacting transactivator, with Glu/Asp-rich carboxy-terminal domain, 2   | 0.479 | 0.039761  |
| 1420089_at   | Nfkbia | nuclear factor of kappa light polypeptide gene enhancer in B-cells inhibitor, alpha | 0.479 | 0.0126398 |
| 1456702_x_at | Mat2a  | methionine adenosyltransferase II, alpha                                            | 0.479 | 0.0040562 |
| 1417139_at   | Dsn1   | DSN1, MIND kinetochore complex component, homolog (S. cerevisiae)                   | 0.479 | 0.0073118 |
| 1435995_at   | Mrpl22 | mitochondrial ribosomal protein L22                                                 | 0.479 | 0.0021452 |
| 1417044_at   | Lcmt1  | leucine carboxyl methyltransferase 1                                                | 0.479 | 0.0016427 |
| 1455011_at   | Stard4 | StAR-related lipid transfer (START) domain containing 4                             | 0.480 | 0.0024464 |
| 1438948_x_at | Tspo   | translocator protein                                                                | 0.480 | 0.0017252 |
| 1438644_x_at | Comm9  | COMM domain containing 9                                                            | 0.480 | 0.0034814 |
| 1426394_at   | Eif3j  | eukaryotic translation initiation factor 3, subunit J                               | 0.480 | 0.0034567 |
| 1456738_s_at | Brp16  | brain protein 16                                                                    | 0.480 | 0.0025415 |

|              |               |                                                                                             |       |           |
|--------------|---------------|---------------------------------------------------------------------------------------------|-------|-----------|
| 1429737_a_at | CrIs1         | cardiolipin synthase 1                                                                      | 0.480 | 0.0045433 |
| 1417078_at   | Lgals2        | lectin, galactose-binding, soluble 2                                                        | 0.480 | 0.0039891 |
| 1437797_at   | Atp2a2        | ATPase, Ca <sup>++</sup> transporting, cardiac muscle, slow twitch 2                        | 0.480 | 0.00338   |
| 1418522_at   | Mtx1          | metaxin 1                                                                                   | 0.480 | 0.0045536 |
| 1416189_a_at | Sec61a1       | Sec61 alpha 1 subunit (S. cerevisiae)                                                       | 0.480 | 0.0022863 |
| 1420093_s_at | Hnrpd1        | heterogeneous nuclear ribonucleoprotein D-like                                              | 0.481 | 0.0021724 |
| 1423744_x_at | Eif2s3x       | eukaryotic translation initiation factor 2, subunit 3, structural gene X-linked             | 0.481 | 0.003517  |
| 1429458_at   | 2410127L17Rik | RIKEN cDNA 2410127L17 gene                                                                  | 0.481 | 0.0024753 |
| 1448465_at   | Nipsnap1      | 4-nitrophenylphosphatase domain and non-neuronal SNAP25-like protein homolog 1 (C. elegans) | 0.481 | 0.0038926 |
| 1437783_x_at | Cnpy2         | canopy 2 homolog (zebrafish)                                                                | 0.481 | 0.0016511 |
| 1456107_x_at | Eftud2        | elongation factor Tu GTP binding domain containing 2                                        | 0.482 | 0.0023951 |
| 1441866_s_at | Ptdss1        | phosphatidylserine synthase 1                                                               | 0.482 | 0.0016274 |
| 1424202_at   | Seh1l         | SEH1-like (S. cerevisiae)                                                                   | 0.482 | 0.0105478 |
| 1429539_at   | Bcl2l13       | BCL2-like 13 (apoptosis facilitator)                                                        | 0.482 | 0.0065371 |

|              |               |                                                                                           |       |           |
|--------------|---------------|-------------------------------------------------------------------------------------------|-------|-----------|
| 1416367_at   | 1110001J03Rik | RIKEN cDNA<br>1110001J03<br>gene                                                          | 0.482 | 0.0033495 |
| 1423215_at   | Spcs2         | signal peptidase<br>complex subunit<br>2 homolog (S.<br>cerevisiae)                       | 0.482 | 0.0070475 |
| 1416056_a_at | Ndufb11       | NADH<br>dehydrogenase<br>(ubiquinone) 1<br>beta<br>subcomplex, 11                         | 0.482 | 0.0023595 |
| 1449039_a_at | Hnrpd1        | heterogeneous<br>nuclear<br>ribonucleoprotei<br>n D-like                                  | 0.482 | 0.0016746 |
| 1423131_at   | 5730427N09Rik | RIKEN cDNA<br>5730427N09<br>gene                                                          | 0.482 | 0.0091983 |
| 1424170_at   | Phf5a         | PHD finger<br>protein 5A                                                                  | 0.482 | 0.0029951 |
| 1420760_s_at | Ndrp1         | N-myc<br>downstream<br>regulated gene<br>1                                                | 0.482 | 0.0045139 |
| 1423156_at   | Gnpnat1       | glucosamine-<br>phosphate N-<br>acetyltransferas<br>e 1                                   | 0.482 | 0.0021153 |
| 1460551_at   | Ran           | RAN, member<br>RAS oncogene<br>family                                                     | 0.483 | 0.0022434 |
| 1460211_a_at | Kdelr1        | KDEL (Lys-Asp-<br>Glu-Leu)<br>endoplasmic<br>reticulum protein<br>retention<br>receptor 1 | 0.483 | 0.0028382 |
| 1426572_at   | Me2           | malic enzyme 2,<br>NAD(+)-<br>dependent,<br>mitochondrial                                 | 0.483 | 0.0030075 |
| 1449056_at   | E330009J07Rik | RIKEN cDNA<br>E330009J07<br>gene                                                          | 0.483 | 0.0033578 |
| 1451259_at   | Rexo2         | REX2, RNA<br>exonuclease 2<br>homolog (S.<br>cerevisiae)                                  | 0.483 | 0.002104  |

|              |         |                                                                        |       |           |
|--------------|---------|------------------------------------------------------------------------|-------|-----------|
| 1448144_at   | Hnrnpab | heterogeneous nuclear ribonucleoprotein A/B                            | 0.483 | 0.0052193 |
| 1415740_at   | Psmc5   | protease (prosome, macropain) 26S subunit, ATPase 5                    | 0.484 | 0.0028112 |
| 1420368_at   | Denr    | density-regulated protein                                              | 0.484 | 0.002837  |
| 1453983_a_at | Mett10d | methyltransferase 10 domain containing                                 | 0.484 | 0.0069821 |
| 1460703_at   | Ascc1   | activating signal cointegrator 1 complex subunit 1                     | 0.484 | 0.0090803 |
| 1417294_at   | Akr7a5  | aldo-keto reductase family 7, member A5 (aflatoxin aldehyde reductase) | 0.484 | 0.0048581 |
| 1443546_at   | NA      | NA                                                                     | 0.484 | 0.0045067 |
| 1424716_at   | Retsat  | retinol saturase (all trans retinol 13,14 reductase)                   | 0.484 | 0.0127201 |
| 1434690_at   | Lycat   | lysocardiolipin acyltransferase                                        | 0.484 | 0.0053941 |
| 1448268_at   | Tmed9   | transmembrane emp24 protein transport domain containing 9              | 0.485 | 0.0019514 |
| 1437489_x_at | Sdhd    | succinate dehydrogenase complex, subunit D, integral membrane protein  | 0.485 | 0.0045399 |
| 1421813_a_at | Psap    | prosaposin                                                             | 0.485 | 0.0037352 |
| 1448318_at   | Adfp    | adipose differentiation related protein                                | 0.485 | 0.0041996 |



|              |               |                                                                     |       |           |
|--------------|---------------|---------------------------------------------------------------------|-------|-----------|
| 1448704_s_at | H47           | histocompatibility 47                                               | 0.485 | 0.0028347 |
| 1444472_at   | NA            | NA                                                                  | 0.486 | 0.0056547 |
| 1423820_at   | Elof1         | elongation factor 1 homolog (ELF1, S. cerevisiae)                   | 0.486 | 0.0043733 |
| 1434514_at   | Rbm15         | RNA binding motif protein 15                                        | 0.486 | 0.0052738 |
| 1423317_at   | 3110001D03Rik | RIKEN cDNA 3110001D03 gene                                          | 0.486 | 0.0029618 |
| 1428068_at   | Samm50        | sorting and assembly machinery component 50 homolog (S. cerevisiae) | 0.486 | 0.0046407 |
| 1434395_at   | Man1a2        | mannosidase, alpha, class 1A, member 2                              | 0.486 | 0.0092039 |
| 1454888_at   | Pfdn4         | prefoldin 4                                                         | 0.486 | 0.0035702 |
| 1423589_at   | Arpc4         | actin related protein 2/3 complex, subunit 4                        | 0.486 | 0.0095942 |
| 1452359_at   | Rell1         | RELT-like 1                                                         | 0.487 | 0.0056835 |
| 1428996_at   | 4833426J09Rik | RIKEN cDNA 4833426J09 gene                                          | 0.487 | 0.0090206 |
| 1460737_at   | Igbp1         | immunoglobulin (CD79A) binding protein 1                            | 0.487 | 0.0033956 |
| 1416696_at   | D17Wsu104e    | DNA segment, Chr 17, Wayne State University 104, expressed          | 0.487 | 0.0080203 |
| 1454843_at   | Prps2         | phosphoribosyl pyrophosphate synthetase 2                           | 0.487 | 0.0037258 |
| 1416400_at   | Pycrl         | pyrroline-5-carboxylate reductase-like                              | 0.487 | 0.0063309 |
| 1452313_at   | 5930416119Rik | RIKEN cDNA 5930416119 gene                                          | 0.487 | 0.0103196 |
| 1418869_a_at | Pus1          | pseudouridine synthase 1                                            | 0.487 | 0.0074203 |

|              |               |                                                                                            |       |           |
|--------------|---------------|--------------------------------------------------------------------------------------------|-------|-----------|
| 1438816_at   | Ahctf1        | AT hook containing transcription factor 1                                                  | 0.487 | 0.0029666 |
| 1416185_a_at | Adh5          | alcohol dehydrogenase 5 (class III), chi polypeptide                                       | 0.487 | 0.0029861 |
| 1422778_at   | Taf9          | TAF9 RNA polymerase II, TATA box binding protein (TBP)-associated factor                   | 0.487 | 0.0036965 |
| 1433746_at   | Wdr3          | WD repeat domain 3                                                                         | 0.487 | 0.0018467 |
| 1425364_a_at | Slc3a2        | solute carrier family 3 (activators of dibasic and neutral amino acid transport), member 2 | 0.487 | 0.0032125 |
| 1434266_at   | AI847670      | expressed sequence AI847670                                                                | 0.488 | 0.0044707 |
| 1428326_s_at | Hrsp12        | heat-responsive protein 12                                                                 | 0.488 | 0.0054319 |
| 1448361_at   | Ttc3          | tetratricopeptide repeat domain 3                                                          | 0.488 | 0.0026895 |
| 1460175_at   | Rps23         | ribosomal protein S23                                                                      | 0.488 | 0.0024763 |
| 1431537_at   | 2010001E11Rik | RIKEN cDNA 2010001E11 gene                                                                 | 0.488 | 0.0024679 |
| 1426265_x_at | Dlat          | dihydrolipoamide S-acetyltransferase (E2 component of pyruvate dehydrogenase complex)      | 0.488 | 0.0083184 |
| 1428635_at   | Comtd1        | catechol-O-methyltransferase domain containing 1                                           | 0.489 | 0.0039287 |

|              |        |                                                         |       |           |
|--------------|--------|---------------------------------------------------------|-------|-----------|
| 1429239_a_at | Stard4 | StAR-related lipid transfer (START) domain containing 4 | 0.489 | 0.0028371 |
| 1424489_a_at | Trit1  | tRNA isopentenyltransferase 1                           | 0.489 | 0.0024548 |
| 1455869_at   | NA     | NA                                                      | 0.489 | 0.0047976 |
| 1452157_at   | Eprs   | glutamyl-prolyl-tRNA synthetase                         | 0.489 | 0.0058291 |
| 1448666_s_at | Tob2   | transducer of ERBB2, 2                                  | 0.489 | 0.002343  |
| 1428680_at   | Cds1   | CDP-diacylglycerol synthase 1                           | 0.489 | 0.0033893 |
| 1420000_s_at | Igbp1  | immunoglobulin (CD79A) binding protein 1                | 0.489 | 0.0020149 |
| 1427720_a_at | Rrp1   | ribosomal RNA processing 1 homolog (S. cerevisiae)      | 0.489 | 0.0046842 |
| 1457867_at   | Sgpp2  | sphingosine-1-phosphate phosphatase 2                   | 0.489 | 0.0043888 |
| 1434807_s_at | Mtx3   | metaxin 3                                               | 0.489 | 0.0034805 |
| 1434418_at   | Lass6  | LAG1 homolog, ceramide synthase 6                       | 0.489 | 0.0027908 |
| 1424990_at   | Orai1  | ORAI calcium release-activated calcium modulator 1      | 0.490 | 0.0068309 |
| 1452144_a_at | Mrpl44 | mitochondrial ribosomal protein L44                     | 0.490 | 0.0036912 |
| 1455578_x_at | Rpl41  | ribosomal protein L41                                   | 0.490 | 0.0039214 |
| 1416140_a_at | Dhx30  | DEAH (Asp-Glu-Ala-His) box polypeptide 30               | 0.490 | 0.0050453 |
| 1416663_at   | Ndufa9 | NADH dehydrogenase (ubiquinone) 1 alpha subcomplex, 9   | 0.490 | 0.0045604 |

|              |               |                                                                       |       |           |
|--------------|---------------|-----------------------------------------------------------------------|-------|-----------|
| 1442537_at   | NA            | NA                                                                    | 0.490 | 0.0170966 |
| 1450638_at   | Pdcd5         | programmed cell death 5                                               | 0.490 | 0.0027299 |
| 1448737_at   | Tspan7        | tetraspanin 7                                                         | 0.490 | 0.0101649 |
| 1429456_a_at | Polr3e        | polymerase (RNA) III (DNA directed) polypeptide E                     | 0.490 | 0.0072434 |
| 1433970_at   | Bola3         | bolA-like 3 (E. coli)                                                 | 0.490 | 0.0063773 |
| 1430019_a_at | Hnrnpa1       | heterogeneous nuclear ribonucleoprotein A1                            | 0.491 | 0.0052275 |
| 1424554_at   | Ppp1r8        | protein phosphatase 1, regulatory (inhibitor) subunit 8               | 0.491 | 0.0222449 |
| 1437972_s_at | Sf3b5         | splicing factor 3b, subunit 5                                         | 0.491 | 0.0050109 |
| 1436349_at   | 2700094K13Rik | RIKEN cDNA 2700094K13 gene                                            | 0.491 | 0.0079042 |
| 1428094_at   | Lamp2         | lysosomal-associated membrane protein 2                               | 0.491 | 0.00791   |
| 1416292_at   | Prdx3         | peroxiredoxin 3                                                       | 0.491 | 0.0103165 |
| 1418347_at   | Ccdc22        | coiled-coil domain containing 22                                      | 0.491 | 0.0181682 |
| 1415872_at   | Hnrnph1       | heterogeneous nuclear ribonucleoprotein H1                            | 0.491 | 0.0025133 |
| 1423210_a_at | Nola3         | nucleolar protein family A, member 3                                  | 0.491 | 0.0035122 |
| 1460606_at   | Hsd17b13      | hydroxysteroid (17-beta) dehydrogenase 13                             | 0.492 | 0.0073746 |
| 1452923_at   | Ndutf2        | NADH dehydrogenase (ubiquinone) 1 alpha subcomplex, assembly factor 2 | 0.492 | 0.0036718 |
| 1417080_a_at | Ecsit         | ECSIT homolog (Drosophila)                                            | 0.492 | 0.0132907 |

|              |        |                                                                                     |       |           |
|--------------|--------|-------------------------------------------------------------------------------------|-------|-----------|
| 1456279_a_at | Bcap31 | B-cell receptor-associated protein 31                                               | 0.492 | 0.0052523 |
| 1460205_at   | Dcakd  | dephospho-CoA kinase domain containing                                              | 0.493 | 0.0245563 |
| 1416372_at   | Ptdss1 | phosphatidylserine synthase 1                                                       | 0.493 | 0.0023933 |
| 1441274_at   | NA     | NA                                                                                  | 0.493 | 0.0041599 |
| 1424574_at   | Tmed5  | transmembrane emp24 protein transport domain containing 5                           | 0.493 | 0.0029622 |
| 1454917_at   | Alg10b | asparagine-linked glycosylation 10 homolog B (yeast, alpha-1,2 glucosyltransferase) | 0.493 | 0.0067421 |
| 1426069_s_at | Slc7a4 | solute carrier family 7 (cationic amino acid transporter, y+ system), member 4      | 0.493 | 0.0131971 |
| 1429234_s_at | 11-Sep | septin 11                                                                           | 0.493 | 0.0032176 |
| 1447780_x_at | Tufm   | Tu translation elongation factor, mitochondrial                                     | 0.494 | 0.003041  |
| 1419273_at   | C80913 | expressed sequence C80913                                                           | 0.494 | 0.0026858 |
| 1418563_at   | Serbp1 | Serpine1 mRNA binding protein 1                                                     | 0.494 | 0.0040082 |
| 1416940_at   | Ppif   | peptidylprolyl isomerase F (cyclophilin F)                                          | 0.494 | 0.0042132 |
| 1424213_at   | Ubiad1 | UbiA prenyltransferase domain containing 1                                          | 0.494 | 0.0255063 |
| 1438179_s_at | Elp2   | elongation protein 2 homolog (S. cerevisiae)                                        | 0.494 | 0.0034442 |

|              |          |                                                                                   |       |           |
|--------------|----------|-----------------------------------------------------------------------------------|-------|-----------|
| 1439453_x_at | Rnaseh2c | ribonuclease H2, subunit C                                                        | 0.494 | 0.0031741 |
| 1418225_at   | Orc2l    | origin recognition complex, subunit 2-like (S. cerevisiae)                        | 0.494 | 0.0357863 |
| 1433490_s_at | Epb4.1l2 | erythrocyte protein band 4.1-like 2                                               | 0.494 | 0.0026784 |
| 1415993_at   | Sqle     | squalene epoxidase                                                                | 0.494 | 0.0108078 |
| 1460198_a_at | Psmb3    | proteasome (prosome, macropain) subunit, beta type 3                              | 0.494 | 0.0039726 |
| 1423711_at   | Ndufaf1  | NADH dehydrogenase (ubiquinone) 1 alpha subcomplex, assembly factor 1             | 0.494 | 0.0057866 |
| 1426213_at   | Imp4     | IMP4, U3 small nucleolar ribonucleoprotein, homolog (yeast)                       | 0.494 | 0.0060359 |
| 1417313_at   | Lsm7     | LSM7 homolog, U6 small nuclear RNA associated (S. cerevisiae)                     | 0.495 | 0.0025353 |
| 1452917_at   | Rfc5     | replication factor C (activator 1) 5                                              | 0.495 | 0.0157799 |
| 1428772_at   | Xpot     | exportin, tRNA (nuclear export receptor for tRNAs)                                | 0.495 | 0.0030069 |
| 1428146_s_at | Acaa2    | acetyl-Coenzyme A acyltransferase 2 (mitochondrial 3-oxoacyl-Coenzyme A thiolase) | 0.495 | 0.0039267 |
| 1441718_at   | NA       | NA                                                                                | 0.496 | 0.0036935 |

|              |               |                                                                                          |       |           |
|--------------|---------------|------------------------------------------------------------------------------------------|-------|-----------|
| 1447679_s_at | Bms1          | BMS1 homolog, ribosome assembly protein (yeast)                                          | 0.496 | 0.0025742 |
| 1433867_at   | 1810030O07Rik | RIKEN cDNA 1810030O07 gene                                                               | 0.496 | 0.0056669 |
| 1416057_at   | Ndufb11       | NADH dehydrogenase (ubiquinone) 1 beta subcomplex, 11                                    | 0.496 | 0.0044386 |
| 1454725_at   | Tra2a         | transformer 2 alpha homolog (Drosophila)                                                 | 0.496 | 0.002529  |
| 1422752_at   | Polr3k        | polymerase (RNA) III (DNA directed) polypeptide K                                        | 0.496 | 0.0038683 |
| 1438458_a_at | Sfpq          | splicing factor proline/glutamine rich (polypyrimidine tract binding protein associated) | 0.496 | 0.0031735 |
| 1418573_a_at | Raly          | hnRNP-associated with lethal yellow                                                      | 0.496 | 0.0118863 |
| 1416840_at   | Mid1ip1       | Mid1 interacting protein 1 (gastrulation specific G12-like (zebrafish))                  | 0.496 | 0.0042374 |
| 1448691_at   | Ubqln4        | ubiquilin 4                                                                              | 0.496 | 0.0086205 |
| 1435444_at   | Atf6          | activating transcription factor 6                                                        | 0.496 | 0.0047405 |
| 1438555_x_at | Muc4          | mucin 4                                                                                  | 0.497 | 0.004146  |
| 1431012_a_at | Peci          | peroxisomal delta3, delta2-enoyl-Coenzyme A isomerase                                    | 0.497 | 0.0025275 |
| 1429787_x_at | Zwint         | ZW10 interactor                                                                          | 0.497 | 0.0062315 |

|              |               |                                                                                           |       |           |
|--------------|---------------|-------------------------------------------------------------------------------------------|-------|-----------|
| 1450887_at   | Rqcd1         | rcd1 (required for cell differentiation) homolog 1 (S. pombe)                             | 0.497 | 0.0059381 |
| 1454852_at   | Sp1           | trans-acting transcription factor 1                                                       | 0.497 | 0.002302  |
| 1416083_at   | Zfand5        | zinc finger, AN1-type domain 5                                                            | 0.497 | 0.0024088 |
| 1428556_at   | Pigy          | phosphatidylinositol glycan anchor biosynthesis, class Y                                  | 0.497 | 0.0052758 |
| 1436214_at   | 1110028C15Rik | RIKEN cDNA 1110028C15 gene                                                                | 0.498 | 0.0033964 |
| 1416942_at   | Erap1         | endoplasmic reticulum aminopeptidase 1                                                    | 0.498 | 0.008462  |
| 1418530_at   | Nup160        | nucleoporin 160                                                                           | 0.498 | 0.0191585 |
| 1427094_at   | Pole2         | polymerase (DNA directed), epsilon 2 (p59 subunit)                                        | 0.498 | 0.0036079 |
| 1428661_at   | Nfkbil2       | nuclear factor of kappa light polypeptide gene enhancer in B-cells inhibitor-like 2       | 0.498 | 0.0074621 |
| 1415962_at   | Eif3h         | eukaryotic translation initiation factor 3, subunit H                                     | 0.498 | 0.0046282 |
| 1433741_at   | Cd38          | CD38 antigen                                                                              | 0.498 | 0.0069548 |
| 1417921_at   | 2610029G23Rik | RIKEN cDNA 2610029G23 gene                                                                | 0.498 | 0.0060296 |
| 1450012_x_at | Ywhag         | tyrosine 3-monooxygenase/tryptophan 5-monooxygenase activation protein, gamma polypeptide | 0.498 | 0.004989  |



|              |          |                                                                                                |       |           |
|--------------|----------|------------------------------------------------------------------------------------------------|-------|-----------|
| 1424235_at   | Ormdl2   | ORM1-like 2 (S. cerevisiae)                                                                    | 0.498 | 0.0053481 |
| 1417823_at   | Gcat     | glycine C-acetyltransferase (2-amino-3-ketobutyrate-coenzyme A ligase)                         | 0.498 | 0.0063929 |
| 1425603_at   | Tmem176a | transmembrane protein 176A                                                                     | 0.498 | 0.0034858 |
| 1456349_x_at | Sumo1    | SMT3 suppressor of mif two 3 homolog 1 (yeast)                                                 | 0.499 | 0.0062199 |
| 1433811_at   | Mllt6    | myeloid/lymphoid or mixed-lineage leukemia (trithorax homolog, Drosophila); translocated to, 6 | 0.499 | 0.0048173 |
| 1451121_a_at | Gltscr2  | glioma tumor suppressor candidate region gene 2                                                | 0.499 | 0.0038335 |
| 1448707_at   | Taf13    | TAF13 RNA polymerase II, TATA box binding protein (TBP)-associated factor                      | 0.499 | 0.0027146 |
| 1454617_at   | Arrdc3   | arrestin domain containing 3                                                                   | 0.499 | 0.003145  |
| 1423803_s_at | Gltscr2  | glioma tumor suppressor candidate region gene 2                                                | 0.499 | 0.0050858 |
| 1424541_at   | Tmem70   | transmembrane protein 70                                                                       | 0.500 | 0.0127711 |
| 1448123_s_at | Tgfbi    | transforming growth factor, beta induced                                                       | 0.500 | 0.0029946 |
| 1451262_a_at | Jtv1     | JTV1 gene                                                                                      | 0.500 | 0.0084999 |
| 1425255_s_at | Hnrpll   | heterogeneous nuclear ribonucleoprotein L-like                                                 | 0.500 | 0.0033436 |

|              |               |                                                 |       |           |
|--------------|---------------|-------------------------------------------------|-------|-----------|
| 1440146_at   | Vps13a        | vacuolar protein sorting 13A (yeast)            | 2.000 | 0.0223051 |
| 1423449_a_at | Actn4         | actinin alpha 4                                 | 2.001 | 0.0031782 |
| 1424612_at   | Npal2         | NIPA-like domain containing 2                   | 2.003 | 0.0035668 |
| 1433203_at   | 6030400A10Rik | RIKEN cDNA 6030400A10 gene                      | 2.004 | 0.0072243 |
| 1429452_x_at | 4933439C20Rik | RIKEN cDNA 4933439C20 gene                      | 2.006 | 0.0106362 |
| 1437016_x_at | LOC100047558  | similar to RAP2C, member of RAS oncogene family | 2.007 | 0.0062182 |
| 1418635_at   | Etv3          | ets variant gene 3                              | 2.007 | 0.0044166 |
| 1444010_at   | Eif4e         | eukaryotic translation initiation factor 4E     | 2.008 | 0.0054454 |
| 1452326_at   | Atp2c2        | ATPase, Ca++ transporting, type 2C, member 2    | 2.008 | 0.032159  |
| 1417262_at   | Ptgs2         | prostaglandin-endoperoxide synthase 2           | 2.008 | 0.0424844 |
| 1452373_at   | 1700081L11Rik | RIKEN cDNA 1700081L11 gene                      | 2.009 | 0.0169581 |
| 1447087_at   | NA            | NA                                              | 2.009 | 0.0046923 |
| 1420990_at   | Chd1          | chromodomain helicase DNA binding protein 1     | 2.009 | 0.0064616 |
| 1419124_at   | 2210010L05Rik | RIKEN cDNA 2210010L05 gene                      | 2.009 | 0.0145811 |
| 1452137_at   | Acbd3         | acyl-Coenzyme A binding domain containing 3     | 2.009 | 0.0055152 |
| 1416911_a_at | Akirin1       | akirin 1                                        | 2.009 | 0.004272  |

|              |               |                                                                           |       |           |
|--------------|---------------|---------------------------------------------------------------------------|-------|-----------|
| 1438116_x_at | Slc9a3r1      | solute carrier family 9 (sodium/hydrogen exchanger), member 3 regulator 1 | 2.010 | 0.0075945 |
| 1433204_at   | 2810436B12Rik | RIKEN cDNA 2810436B12 gene                                                | 2.010 | 0.0108761 |
| 1452445_at   | Slc41a2       | solute carrier family 41, member 2                                        | 2.011 | 0.0038567 |
| 1418097_a_at | Crlf2         | cytokine receptor-like factor 2                                           | 2.011 | 0.0030143 |
| 1457821_at   | NA            | NA                                                                        | 2.014 | 0.0085407 |
| 1460634_at   | Ralgds        | ras guanine nucleotide dissociation stimulator                            | 2.015 | 0.0054524 |
| 1416656_at   | Clic1         | chloride intracellular channel 1                                          | 2.016 | 0.0036578 |
| 1437862_at   | Rbm25         | RNA binding motif protein 25                                              | 2.017 | 0.0293388 |
| 1416427_at   | Ccni          | cyclin I                                                                  | 2.017 | 0.0022238 |
| 1431746_a_at | Uba3          | ubiquitin-like modifier activating enzyme 3                               | 2.017 | 0.0082869 |
| 1438514_at   | Npc111        | NPC1-like 1                                                               | 2.017 | 0.0055097 |
| 1425994_a_at | Asah2         | N-acylsphingosine amidohydrolase 2                                        | 2.018 | 0.0082942 |
| 1435927_at   | Dennd3        | DENN/MADD domain containing 3                                             | 2.018 | 0.0053465 |
| 1429005_at   | Mfhas1        | malignant fibrous histiocytoma amplified sequence 1                       | 2.018 | 0.027283  |
| 1455000_at   | Gpr68         | G protein-coupled receptor 68                                             | 2.018 | 0.0078857 |
| 1449755_at   | D7Erttd183e   | DNA segment, Chr 7, ERATO Doi 183, expressed                              | 2.019 | 0.0099339 |
| 1444828_at   | NA            | NA                                                                        | 2.019 | 0.0098707 |

|              |               |                                                                              |       |           |
|--------------|---------------|------------------------------------------------------------------------------|-------|-----------|
| 1435634_at   | Pcmdt1        | protein-L-isoaspartate (D-aspartate) O-methyltransferase domain containing 1 | 2.019 | 0.0059379 |
| 1424349_a_at | Lpgat1        | lysophosphatidyl glycerol acyltransferase 1                                  | 2.019 | 0.0030522 |
| 1436008_at   | Tpd52         | tumor protein D52                                                            | 2.019 | 0.0034483 |
| 1444050_at   | Wisp3         | WNT1 inducible signaling pathway protein 3                                   | 2.019 | 0.0310657 |
| 1451206_s_at | Cytip         | cytohesin 1 interacting protein                                              | 2.020 | 0.0238872 |
| 1442096_at   | Lrrc66        | leucine rich repeat containing 66                                            | 2.020 | 0.0028604 |
| 1418831_at   | Pkp3          | plakophilin 3                                                                | 2.020 | 0.0041811 |
| 1417141_at   | Igtp          | interferon gamma induced GTPase                                              | 2.021 | 0.0172748 |
| 1447827_x_at | Spop          | speckle-type POZ protein                                                     | 2.021 | 0.0045087 |
| 1424350_s_at | Lpgat1        | lysophosphatidyl glycerol acyltransferase 1                                  | 2.021 | 0.0076901 |
| 1439908_at   | Zkscan1       | zinc finger with KRAB and SCAN domains 1                                     | 2.022 | 0.0327161 |
| 1450642_at   | 3110001I20Rik | RIKEN cDNA 3110001I20 gene                                                   | 2.022 | 0.0052125 |
| 1425649_at   | Slc39a14      | solute carrier family 39 (zinc transporter), member 14                       | 2.024 | 0.0047137 |
| 1460498_a_at | Dnajc5        | DnaJ (Hsp40) homolog, subfamily C, member 5                                  | 2.024 | 0.0045938 |
| 1424932_at   | Egfr          | epidermal growth factor receptor                                             | 2.025 | 0.005428  |

|              |        |                                                                 |       |           |
|--------------|--------|-----------------------------------------------------------------|-------|-----------|
| 1433768_at   | Palld  | palladin, cytoskeletal associated protein                       | 2.025 | 0.0051961 |
| 1427228_at   | Palld  | palladin, cytoskeletal associated protein                       | 2.025 | 0.0030677 |
| 1460562_at   | Eftud1 | elongation factor Tu GTP binding domain containing 1            | 2.025 | 0.0034872 |
| 1460203_at   | Itpr1  | inositol 1,4,5-triphosphate receptor 1                          | 2.026 | 0.0045686 |
| 1459689_at   | NA     | NA                                                              | 2.026 | 0.0076302 |
| 1451136_a_at | Eif2b2 | eukaryotic translation initiation factor 2B, subunit 2 beta     | 2.026 | 0.0101054 |
| 1425488_at   | Slu7   | SLU7 splicing factor homolog (S. cerevisiae)                    | 2.026 | 0.0087734 |
| 1427910_at   | Cst6   | cystatin E/M                                                    | 2.028 | 0.0061656 |
| 1441200_at   | Klf3   | Kruppel-like factor 3 (basic)                                   | 2.028 | 0.0022034 |
| 1431564_at   | Bcar3  | breast cancer anti-estrogen resistance 3                        | 2.028 | 0.0188706 |
| 1424457_at   | Apbb3  | amyloid beta (A4) precursor protein-binding, family B, member 3 | 2.029 | 0.0163162 |
| 1452934_at   | Tmc5   | transmembrane channel-like gene family 5                        | 2.029 | 0.0061349 |
| 1424442_a_at | Pja2   | praja 2, RING-H2 motif containing                               | 2.029 | 0.0112516 |
| 1422824_s_at | Eps8   | epidermal growth factor receptor pathway substrate 8            | 2.030 | 0.0060031 |
| 1439034_at   | Spn    | sialophorin                                                     | 2.030 | 0.0098421 |
| 1426983_at   | Fnbp1  | formin binding protein 1                                        | 2.030 | 0.0150251 |

|              |               |                                                             |       |           |
|--------------|---------------|-------------------------------------------------------------|-------|-----------|
| 1450701_a_at | Gtf2h2        | general transcription factor II H, polypeptide 2            | 2.031 | 0.0032951 |
| 1434178_at   | Mll3          | myeloid/lymphoid or mixed-lineage leukemia 3                | 2.031 | 0.0089581 |
| 1441883_at   | 0610010O12Rik | RIKEN cDNA 0610010O12 gene                                  | 2.031 | 0.0100505 |
| 1436895_at   | Centd1        | centaurin, delta 1                                          | 2.032 | 0.0032132 |
| 1433448_at   | Slc25a44      | solute carrier family 25, member 44                         | 2.032 | 0.0063901 |
| 1447257_at   | NA            | NA                                                          | 2.032 | 0.019675  |
| 1415952_at   | Mark2         | MAP/microtubule affinity-regulating kinase 2                | 2.033 | 0.0082038 |
| 1425668_a_at | St3gal4       | ST3 beta-galactoside alpha-2,3-sialyltransferase 4          | 2.033 | 0.0146118 |
| 1429360_at   | Klf3          | Kruppel-like factor 3 (basic)                               | 2.034 | 0.0024816 |
| 1429624_at   | Sltm          | SAFB-like, transcription modulator                          | 2.034 | 0.0111083 |
| 1424646_at   | Uckl1         | uridine-cytidine kinase 1-like 1                            | 2.034 | 0.0025982 |
| 1416132_at   | Efr3a         | EFR3 homolog A ( <i>S. cerevisiae</i> )                     | 2.035 | 0.0074192 |
| 1418367_x_at | Hist2h2aa1    | histone cluster 2, H2aa1                                    | 2.035 | 0.0091301 |
| 1448651_at   | Nudt5         | nudix (nucleoside diphosphate linked moiety X)-type motif 5 | 2.035 | 0.006116  |
| 1434160_at   | Zfp592        | zinc finger protein 592                                     | 2.037 | 0.0040852 |
| 1442645_at   | Atp2b3        | ATPase, Ca <sup>++</sup> transporting, plasma membrane 3    | 2.037 | 0.0186756 |
| 1455518_at   | NA            | NA                                                          | 2.037 | 0.0397186 |
| 1422759_a_at | Xpo6          | exportin 6                                                  | 2.037 | 0.0033124 |

|              |               |                                                                    |       |           |
|--------------|---------------|--------------------------------------------------------------------|-------|-----------|
| 1430299_at   | Tsc22d4       | TSC22 domain family, member 4                                      | 2.039 | 0.0083847 |
| 1444898_at   | NA            | NA                                                                 | 2.039 | 0.0040963 |
| 1436229_at   | D1Ert53e      | DNA segment, Chr 1, ERATO Doi 53, expressed                        | 2.039 | 0.0160053 |
| 1447803_x_at | Capg          | capping protein (actin filament), gelsolin-like                    | 2.039 | 0.0205454 |
| 1441075_at   | Nostrin       | nitric oxide synthase trafficker                                   | 2.040 | 0.0031968 |
| 1456413_at   | Pde4dip       | phosphodiesterase 4D interacting protein (myomegalin)              | 2.040 | 0.0027164 |
| 1419449_a_at | Gnai2         | guanine nucleotide binding protein (G protein), alpha inhibiting 2 | 2.041 | 0.0033237 |
| 1457696_at   | Rilp          | Rab interacting lysosomal protein                                  | 2.043 | 0.0192719 |
| 1448174_at   | Cul1          | cullin 1                                                           | 2.043 | 0.0029317 |
| 1442382_at   | Mast4         | microtubule associated serine/threonine kinase family member 4     | 2.044 | 0.0095995 |
| 1429089_s_at | 2900026A02Rik | RIKEN cDNA 2900026A02 gene                                         | 2.044 | 0.0026987 |
| 1426223_at   | Ttc39c        | tetratricopeptide repeat domain 39C                                | 2.045 | 0.025305  |
| 1451726_at   | Mtmr6         | myotubularin related protein 6                                     | 2.046 | 0.0141994 |
| 1432155_at   | Wasl          | Wiskott-Aldrich syndrome-like (human)                              | 2.046 | 0.0103665 |
| 1457378_at   | NA            | NA                                                                 | 2.046 | 0.0034549 |

|              |               |                                                       |       |           |
|--------------|---------------|-------------------------------------------------------|-------|-----------|
| 1456676_a_at | Pfkfb3        | 6-phosphofructo-2-kinase/fructose-2,6-biphosphatase 3 | 2.047 | 0.0181637 |
| 1436954_at   | Wipf1         | WAS/WASL interacting protein family, member 1         | 2.047 | 0.0042836 |
| 1421322_a_at | Irf9          | interferon regulatory factor 9                        | 2.047 | 0.0036035 |
| 1460536_at   | 2310079F09Rik | RIKEN cDNA 2310079F09 gene                            | 2.047 | 0.0052499 |
| 1448528_at   | Pdcd10        | programmed cell death 10                              | 2.048 | 0.0037764 |
| 1424059_at   | Suv420h2      | suppressor of variegation 4-20 homolog 2 (Drosophila) | 2.048 | 0.0111041 |
| 1436839_at   | 2010109K11Rik | RIKEN cDNA 2010109K11 gene                            | 2.049 | 0.0062772 |
| 1452304_a_at | Arhgef5       | Rho guanine nucleotide exchange factor (GEF) 5        | 2.049 | 0.0049049 |
| 1424245_at   | Ces2          | carboxylesterase 2                                    | 2.049 | 0.0042119 |
| 1428735_at   | Cd69          | CD69 antigen                                          | 2.049 | 0.0378824 |
| 1441209_at   | NA            | NA                                                    | 2.050 | 0.010852  |
| 1441229_at   | D230019N24Rik | RIKEN cDNA D230019N24 gene                            | 2.050 | 0.0055602 |
| 1450458_at   | Ncoa2         | nuclear receptor coactivator 2                        | 2.051 | 0.0096742 |
| 1447213_at   | NA            | NA                                                    | 2.052 | 0.0036013 |
| 1430412_at   | 2310068C19Rik | RIKEN cDNA 2310068C19 gene                            | 2.052 | 0.0115938 |
| 1452909_at   | 2410127E18Rik | RIKEN cDNA 2410127E18 gene                            | 2.053 | 0.0029309 |
| 1437244_at   | Gas2l3        | growth arrest-specific 2 like 3                       | 2.053 | 0.0082891 |
| 1422147_a_at | Pla2g6        | phospholipase A2, group VI                            | 2.055 | 0.008883  |
| 1420747_at   | Ppnr          | per-pentamer repeat gene                              | 2.056 | 0.0022429 |



|              |        |                                                                              |       |           |
|--------------|--------|------------------------------------------------------------------------------|-------|-----------|
| 1456098_a_at | Elmo2  | engulfment and cell motility 2, ced-12 homolog (C. elegans)                  | 2.056 | 0.0049876 |
| 1436061_at   | NA     | NA                                                                           | 2.056 | 0.0167736 |
| 1418832_at   | Pkp3   | plakophilin 3                                                                | 2.057 | 0.0156671 |
| 1426633_s_at | Kctd14 | potassium channel tetramerisation domain containing 14                       | 2.057 | 0.0024513 |
| 1415859_at   | Eif3c  | eukaryotic translation initiation factor 3, subunit C                        | 2.058 | 0.0102856 |
| 1428736_at   | Gramd3 | GRAM domain containing 3                                                     | 2.058 | 0.0038163 |
| 1453864_at   | Rdh14  | retinol dehydrogenase 14 (all-trans and 9-cis)                               | 2.059 | 0.0044951 |
| 1437591_a_at | Wdr1   | WD repeat domain 1                                                           | 2.059 | 0.0022649 |
| 1434093_at   | Lysmd4 | LysM, putative peptidoglycan-binding, domain containing 4                    | 2.059 | 0.0101376 |
| 1416525_at   | Spop   | speckle-type POZ protein                                                     | 2.060 | 0.008125  |
| 1417978_at   | Eif4e3 | eukaryotic translation initiation factor 4E member 3                         | 2.060 | 0.003836  |
| 1455388_at   | Pcmt1  | protein-L-isoaspartate (D-aspartate) O-methyltransferase domain containing 1 | 2.060 | 0.0074314 |
| 1436343_at   | Chd4   | chromodomain helicase DNA binding protein 4                                  | 2.060 | 0.0025504 |
| 1456420_at   | Arid4a | AT rich interactive domain 4A (RBP1-like)                                    | 2.060 | 0.0181043 |
| 1445375_at   | Itsn2  | intersectin 2                                                                | 2.061 | 0.0020667 |

|                |               |                                                                      |       |           |
|----------------|---------------|----------------------------------------------------------------------|-------|-----------|
| 1442031_at     | Ccdc109a      | coiled-coil domain containing 109A                                   | 2.061 | 0.0035005 |
| 1426233_at     | Map2k4        | mitogen-activated protein kinase kinase 4                            | 2.061 | 0.0272445 |
| 1447602_x_at   | Sulf2         | sulfatase 2                                                          | 2.062 | 0.008858  |
| AFFX-BioC-3_at | NA            | NA                                                                   | 2.062 | 0.0051839 |
| 1416498_at     | Ppic          | peptidylprolyl isomerase C                                           | 2.063 | 0.0038446 |
| 1440755_at     | NA            | NA                                                                   | 2.063 | 0.0044786 |
| 1418290_a_at   | Ezh1          | enhancer of zeste homolog 1 (Drosophila)                             | 2.064 | 0.0125772 |
| 1416274_at     | Ctns          | cystinosis, nephropathic                                             | 2.064 | 0.0036223 |
| 1450927_at     | Lztr1         | leucine-zipper-like transcriptional regulator, 1                     | 2.064 | 0.0027805 |
| 1416418_at     | Gabarapl1     | gamma-aminobutyric acid (GABA(A)) receptor-associated protein-like 1 | 2.065 | 0.0080727 |
| 1418718_at     | Cxcl16        | chemokine (C-X-C motif) ligand 16                                    | 2.065 | 0.0058166 |
| 1442103_at     | Nipbl         | Nipped-B homolog (Drosophila)                                        | 2.065 | 0.0022486 |
| 1448965_at     | Ino80         | INO80 homolog (S. cerevisiae)                                        | 2.066 | 0.0025929 |
| 1425321_a_at   | Clmn          | calmin                                                               | 2.067 | 0.0024834 |
| 1448694_at     | Jun           | Jun oncogene                                                         | 2.068 | 0.0037168 |
| 1450223_at     | Apaf1         | apoptotic peptidase activating factor 1                              | 2.069 | 0.0215087 |
| 1440123_at     | NA            | NA                                                                   | 2.069 | 0.0023823 |
| 1431018_at     | 1810013L24Rik | RIKEN cDNA 1810013L24 gene                                           | 2.069 | 0.0108482 |
| 1428509_at     | Myo1e         | myosin IE                                                            | 2.069 | 0.0067086 |
| 1435032_at     | Golgb1        | golgi autoantigen, golgin subfamily b, macrogolgin 1                 | 2.069 | 0.0031974 |

|              |               |                                                               |       |           |
|--------------|---------------|---------------------------------------------------------------|-------|-----------|
| 1449341_a_at | Stom          | stomatin                                                      | 2.069 | 0.0030589 |
| 1423049_a_at | Tpm1          | tropomyosin 1, alpha                                          | 2.071 | 0.0019956 |
| 1417666_at   | Dnttip1       | deoxynucleotidyl transferase, terminal, interacting protein 1 | 2.072 | 0.0021015 |
| 1417481_at   | Ramp1         | receptor (calcitonin) activity modifying protein 1            | 2.074 | 0.0070223 |
| 1426623_a_at | Arhgap17      | Rho GTPase activating protein 17                              | 2.075 | 0.0037148 |
| 1429032_at   | Micalcl       | MICAL C-terminal like                                         | 2.075 | 0.0125336 |
| 1425452_s_at | Fam84a        | family with sequence similarity 84, member A                  | 2.075 | 0.0200894 |
| 1438683_at   | Wasf2         | WAS protein family, member 2                                  | 2.076 | 0.0034077 |
| 1460722_at   | Soat2         | sterol O-acyltransferase 2                                    | 2.077 | 0.003495  |
| 1456495_s_at | Osbpl6        | oxysterol binding protein-like 6                              | 2.077 | 0.0097023 |
| 1433897_at   | AI597468      | expressed sequence AI597468                                   | 2.078 | 0.0092406 |
| 1456927_at   | Mast2         | microtubule associated serine/threonine kinase 2              | 2.078 | 0.0016431 |
| 1441948_x_at | Zfand3        | zinc finger, AN1-type domain 3                                | 2.079 | 0.0034913 |
| 1430498_at   | 9130009I01Rik | RIKEN cDNA 9130009I01 gene                                    | 2.079 | 0.0107699 |
| 1433840_a_at | C330006K01Rik | RIKEN cDNA C330006K01 gene                                    | 2.080 | 0.0046807 |
| 1455648_at   | NA            | NA                                                            | 2.080 | 0.0044765 |
| 1437643_at   | Cenpj         | centromere protein J                                          | 2.080 | 0.0025979 |

|              |               |                                                                  |       |           |
|--------------|---------------|------------------------------------------------------------------|-------|-----------|
| 1434205_at   | Ppp2r5c       | protein phosphatase 2, regulatory subunit B (B56), gamma isoform | 2.081 | 0.0021822 |
| 1424529_s_at | Cgref1        | cell growth regulator with EF hand domain 1                      | 2.081 | 0.0038525 |
| 1449268_at   | Gfpt1         | glutamine fructose-6-phosphate transaminase 1                    | 2.082 | 0.0022145 |
| 1460213_at   | Golga4        | golgi autoantigen, golgin subfamily a, 4                         | 2.082 | 0.0041412 |
| 1429308_at   | Prdm16        | PR domain containing 16                                          | 2.083 | 0.0020185 |
| 1456526_at   | C130034I24Rik | RIKEN cDNA C130034I24 gene                                       | 2.084 | 0.0027902 |
| 1418816_at   | Chmp1b        | chromatin modifying protein 1B                                   | 2.085 | 0.0053513 |
| 1431173_at   | A930008G19Rik | RIKEN cDNA A930008G19 gene                                       | 2.085 | 0.0069158 |
| 1417394_at   | Klf4          | Kruppel-like factor 4 (gut)                                      | 2.086 | 0.0043135 |
| 1453146_at   | Gapvd1        | GTPase activating protein and VPS9 domains 1                     | 2.086 | 0.0034105 |
| 1426041_a_at | Fgd4          | FYVE, RhoGEF and PH domain containing 4                          | 2.086 | 0.0202307 |
| 1455836_at   | Papola        | poly (A) polymerase alpha                                        | 2.086 | 0.0037304 |
| 1425466_at   | Senp2         | SUMO/sentrin specific peptidase 2                                | 2.086 | 0.025098  |
| 1458148_at   | Nlrc3         | NLR family, CARD domain containing 3                             | 2.087 | 0.0440671 |
| 1422581_at   | Pias1         | protein inhibitor of activated STAT 1                            | 2.087 | 0.0015929 |

|              |               |                                                        |       |           |
|--------------|---------------|--------------------------------------------------------|-------|-----------|
| 1437301_a_at | Dvl1          | dishevelled, dsh homolog 1 (Drosophila)                | 2.088 | 0.005651  |
| 1420745_a_at | Ccndbp1       | cyclin D-type binding-protein 1                        | 2.088 | 0.002295  |
| 1420654_a_at | Gbe1          | glucan (1,4-alpha-), branching enzyme 1                | 2.089 | 0.0224279 |
| 1418425_at   | Sp7           | Sp7 transcription factor 7                             | 2.090 | 0.003433  |
| 1448005_at   | Sash1         | SAM and SH3 domain containing 1                        | 2.091 | 0.0033978 |
| 1442820_at   | NA            | NA                                                     | 2.092 | 0.0079826 |
| 1422397_a_at | Il15ra        | interleukin 15 receptor, alpha chain                   | 2.092 | 0.0056983 |
| 1436255_at   | D830044I16Rik | RIKEN cDNA D830044I16 gene                             | 2.095 | 0.0263459 |
| 1450099_a_at | Gba           | glucosidase, beta, acid                                | 2.095 | 0.0026571 |
| 1457794_at   | Whsc1l1       | Wolf-Hirschhorn syndrome candidate 1-like 1 (human)    | 2.096 | 0.0187478 |
| 1433639_at   | 5730593F17Rik | RIKEN cDNA 5730593F17 gene                             | 2.096 | 0.005182  |
| 1426523_a_at | Gnpda2        | glucosamine-6-phosphate deaminase 2                    | 2.097 | 0.0083145 |
| 1429197_s_at | Rabgap1l      | RAB GTPase activating protein 1-like                   | 2.098 | 0.0058908 |
| 1459457_at   | Camk2d        | calcium/calmodulin-dependent protein kinase II, delta  | 2.098 | 0.0027158 |
| 1441789_at   | NA            | NA                                                     | 2.101 | 0.0192889 |
| 1444552_at   | NA            | NA                                                     | 2.102 | 0.0033361 |
| 1451870_a_at | Brd4          | bromodomain containing 4                               | 2.103 | 0.0027708 |
| 1447063_at   | 14-Sep        | septin 14                                              | 2.103 | 0.0034394 |
| 1425484_at   | Tox           | thymocyte selection-associated high mobility group box | 2.103 | 0.0132448 |

|              |          |                                                                 |       |           |
|--------------|----------|-----------------------------------------------------------------|-------|-----------|
| 1435330_at   | Pyhin1   | pyrin and HIN domain family, member 1                           | 2.103 | 0.0455959 |
| 1422071_at   | Lgals6   | lectin, galactose binding, soluble 6                            | 2.104 | 0.0230815 |
| 1451817_at   | Suv420h1 | suppressor of variegation 4-20 homolog 1 (Drosophila)           | 2.104 | 0.0229271 |
| 1416182_at   | Apba3    | amyloid beta (A4) precursor protein-binding, family A, member 3 | 2.104 | 0.0074022 |
| 1438993_a_at | Atp6v1d  | ATPase, H+ transporting, lysosomal V1 subunit D                 | 2.107 | 0.00865   |
| 1449107_at   | Nudt4    | nudix (nucleoside diphosphate linked moiety X)-type motif 4     | 2.107 | 0.0030296 |
| 1458706_at   | NA       | NA                                                              | 2.108 | 0.0036071 |
| 1444097_at   | Metrn1   | meteorin, glial cell differentiation regulator-like             | 2.109 | 0.0021809 |
| 1453039_at   | Zfp335   | zinc finger protein 335                                         | 2.109 | 0.0017957 |
| 1431744_a_at | Smap1    | stromal membrane-associated protein 1                           | 2.110 | 0.0020176 |
| 1418479_at   | Vps54    | vacuolar protein sorting 54 (yeast)                             | 2.110 | 0.0020399 |
| 1427309_at   | Pars2    | prolyl-tRNA synthetase (mitochondrial)(putative)                | 2.110 | 0.0465463 |
| 1418031_at   | Myo9b    | myosin IXb                                                      | 2.110 | 0.0077678 |
| 1416501_at   | Pdpk1    | 3-phosphoinositide dependent protein kinase-1                   | 2.112 | 0.0028093 |
| 1449289_a_at | Phf2011  | PHD finger protein 20-like 1                                    | 2.113 | 0.0023739 |

|              |           |                                                    |       |           |
|--------------|-----------|----------------------------------------------------|-------|-----------|
| 1450941_at   | Sdcbp     | syndecan binding protein                           | 2.114 | 0.0030919 |
| 1426975_at   | Os9       | amplified in osteosarcoma                          | 2.114 | 0.0035085 |
| 1446855_at   | Vps13d    | vacuolar protein sorting 13 D (yeast)              | 2.114 | 0.0195325 |
| 1443988_at   | Rbm39     | RNA binding motif protein 39                       | 2.115 | 0.0126598 |
| 1424304_at   | Tpcn2     | two pore segment channel 2                         | 2.115 | 0.0223115 |
| 1456212_x_at | Socs3     | suppressor of cytokine signaling 3                 | 2.115 | 0.006884  |
| 1424779_at   | Reep3     | receptor accessory protein 3                       | 2.115 | 0.0060373 |
| 1450034_at   | Stat1     | signal transducer and activator of transcription 1 | 2.116 | 0.0017303 |
| 1421151_a_at | Epha2     | Eph receptor A2                                    | 2.116 | 0.0097104 |
| 1450997_at   | Stk17b    | serine/threonine kinase 17b (apoptosis-inducing)   | 2.116 | 0.0038035 |
| 1424608_a_at | 100039204 | predicted gene, 100039204                          | 2.117 | 0.0240763 |
| 1447575_at   | NA        | NA                                                 | 2.117 | 0.0382173 |
| 1460230_at   | Syn2      | synapsin II                                        | 2.118 | 0.0109505 |
| 1454633_at   | Etnk1     | ethanolamine kinase 1                              | 2.119 | 0.0066647 |
| 1417752_at   | Coro1c    | coronin, actin binding protein 1C                  | 2.120 | 0.0021622 |
| 1428992_at   | Unc13d    | unc-13 homolog D (C. elegans)                      | 2.120 | 0.0018277 |
| 1425522_at   | Rbm25     | RNA binding motif protein 25                       | 2.121 | 0.0016009 |
| 1459998_at   | Zfp407    | zinc finger protein 407                            | 2.121 | 0.0056298 |
| 1416275_at   | Slc26a6   | solute carrier family 26, member 6                 | 2.123 | 0.0041389 |

|              |            |                                                              |       |           |
|--------------|------------|--------------------------------------------------------------|-------|-----------|
| 1449028_at   | Rhou       | ras homolog gene family, member U                            | 2.123 | 0.0077465 |
| 1419232_a_at | Apoa1      | apolipoprotein A-I                                           | 2.124 | 0.0064463 |
| 1419040_at   | Cyp2d22    | cytochrome P450, family 2, subfamily d, polypeptide 22       | 2.124 | 0.0106148 |
| 1450479_x_at | Ptpn12     | protein tyrosine phosphatase, non-receptor type 12           | 2.125 | 0.001817  |
| 1426624_a_at | Ypel3      | yippee-like 3 (Drosophila)                                   | 2.125 | 0.0030294 |
| 1452349_x_at | Ifi205     | interferon activated gene 205                                | 2.125 | 0.0230134 |
| 1452141_a_at | Sepp1      | selenoprotein P, plasma, 1                                   | 2.125 | 0.0049783 |
| 1423194_at   | Arhgap5    | Rho GTPase activating protein 5                              | 2.126 | 0.0281292 |
| 1448448_a_at | Chkb       | choline kinase beta                                          | 2.126 | 0.0043573 |
| 1446118_at   | D17Ert165e | DNA segment, Chr 17, ERATO Doi 165, expressed                | 2.127 | 0.009106  |
| 1454864_at   | Zfp592     | zinc finger protein 592                                      | 2.128 | 0.0013112 |
| 1459556_at   | NA         | NA                                                           | 2.129 | 0.031765  |
| 1425229_a_at | Tcf7l2     | transcription factor 7-like 2, T-cell specific, HMG-box      | 2.129 | 0.0027439 |
| 1460338_a_at | Crlf3      | cytokine receptor-like factor 3                              | 2.130 | 0.0022833 |
| 1418186_at   | Gstt1      | glutathione S-transferase, theta 1                           | 2.130 | 0.0037852 |
| 1417856_at   | Relb       | avian reticuloendotheliosis viral (v-rel) oncogene related B | 2.131 | 0.0104386 |
| 1438035_at   | AW061290   | expressed sequence AW061290                                  | 2.132 | 0.0060676 |
| 1460315_s_at | Tbk1       | TANK-binding kinase 1                                        | 2.133 | 0.0038437 |



|              |               |                                                                  |       |           |
|--------------|---------------|------------------------------------------------------------------|-------|-----------|
| 1455340_at   | D030011O10Rik | RIKEN cDNA D030011O10 gene                                       | 2.134 | 0.0012679 |
| 1450113_at   | Mpp5          | membrane protein, palmitoylated 5 (MAGUK p55 subfamily member 5) | 2.136 | 0.0110025 |
| 1438433_at   | Whdc1         | WAS protein homology region 2 domain containing 1                | 2.137 | 0.0020601 |
| 1428046_a_at | Zfx           | zinc finger protein X-linked                                     | 2.137 | 0.0027226 |
| 1433694_at   | Pde3b         | phosphodiesterase 3B, cGMP-inhibited                             | 2.137 | 0.0017661 |
| 1460643_at   | Ell           | elongation factor RNA polymerase II                              | 2.137 | 0.005773  |
| 1449556_at   | H2-T23        | histocompatibility 2, T region locus 23                          | 2.138 | 0.0072796 |
| 1440020_at   | NA            | NA                                                               | 2.138 | 0.0082263 |
| 1427410_at   | Dleu2         | deleted in lymphocytic leukemia, 2                               | 2.140 | 0.0234119 |
| 1418711_at   | Pdgfa         | platelet derived growth factor, alpha                            | 2.142 | 0.0017693 |
| 1458233_at   | Fryl          | furry homolog-like (Drosophila)                                  | 2.143 | 0.0071559 |
| 1436056_at   | Kif13b        | kinesin family member 13B                                        | 2.143 | 0.0017701 |
| 1428761_a_at | Snapc3        | small nuclear RNA activating complex, polypeptide 3              | 2.143 | 0.0144875 |
| 1445391_at   | Diap1         | diaphanous homolog 1 (Drosophila)                                | 2.143 | 0.0093646 |
| 1448562_at   | Upp1          | uridine phosphorylase 1                                          | 2.144 | 0.0025883 |
| 1422721_at   | Tnk1          | tyrosine kinase, non-receptor, 1                                 | 2.145 | 0.0019853 |
| 1432997_at   | 5830462P14Rik | RIKEN cDNA 5830462P14 gene                                       | 2.146 | 0.0100597 |

|              |                    |                                                                    |       |           |
|--------------|--------------------|--------------------------------------------------------------------|-------|-----------|
| 1422091_at   | Pfkfb2             | 6-phosphofructo-2-kinase/fructose-2,6-biphosphatase 2              | 2.147 | 0.0373996 |
| 1428151_x_at | Ccbl1              | cysteine conjugate-beta lyase 1                                    | 2.147 | 0.0018614 |
| 1426366_at   | Eif2c2             | eukaryotic translation initiation factor 2C, 2                     | 2.147 | 0.0048278 |
| 1458042_at   | NA                 | NA                                                                 | 2.148 | 0.0082795 |
| 1443673_x_at | NA                 | NA                                                                 | 2.148 | 0.0046692 |
| 1425202_a_at | Ank3               | ankyrin 3, epithelial                                              | 2.148 | 0.0074288 |
| 1435549_at   | Trpm4              | transient receptor potential cation channel, subfamily M, member 4 | 2.148 | 0.0028954 |
| 1448765_at   | Fyn                | Fyn proto-oncogene                                                 | 2.149 | 0.0081269 |
| 1434920_a_at | Evl                | Ena-vasodilator stimulated phosphoprotein                          | 2.150 | 0.0073154 |
| 1428195_at   | Ahcy12             | S-adenosylhomocysteine hydrolase-like 2                            | 2.150 | 0.005975  |
| 1445457_at   | ENSMUSG00000073746 | predicted gene, ENSMUSG00000073746                                 | 2.151 | 0.0013976 |
| 1450376_at   | Mxi1               | Max interacting protein 1                                          | 2.151 | 0.00503   |
| 1439424_x_at | Herpud2            | HERPUD family member 2                                             | 2.151 | 0.0045064 |
| 1417385_at   | Npepps             | aminopeptidase puromycin sensitive                                 | 2.152 | 0.0156271 |
| 1455500_at   | Rnf213             | ring finger protein 213                                            | 2.153 | 0.0014762 |

|              |               |                                                        |       |           |
|--------------|---------------|--------------------------------------------------------|-------|-----------|
| 1421846_at   | Wsb2          | WD repeat and SOCS box-containing 2                    | 2.155 | 0.0011641 |
| 1449454_at   | Bst1          | bone marrow stromal cell antigen 1                     | 2.156 | 0.0035117 |
| 1422208_a_at | Gnb5          | guanine nucleotide binding protein (G protein), beta 5 | 2.156 | 0.0054663 |
| 1433441_at   | Fbx15         | F-box and leucine-rich repeat protein 5                | 2.156 | 0.0024586 |
| 1422678_at   | Dgat2         | diacylglycerol O-acyltransferase 2                     | 2.156 | 0.0031032 |
| 1424762_at   | C1qtnf5       | C1q and tumor necrosis factor related protein 5        | 2.157 | 0.0070608 |
| 1418767_at   | Cyp4f13       | cytochrome P450, family 4, subfamily f, polypeptide 13 | 2.158 | 0.0059404 |
| 1444518_at   | Acox1         | acyl-Coenzyme A oxidase 1, palmitoyl                   | 2.158 | 0.0016598 |
| 1435319_at   | Ihpk2         | inositol hexaphosphate kinase 2                        | 2.158 | 0.0082407 |
| 1435880_at   | Ankrd50       | ankrin repeat domain 50                                | 2.159 | 0.0018628 |
| 1450086_at   | Gmeb1         | glucocorticoid modulatory element binding protein 1    | 2.159 | 0.0031421 |
| 1442381_at   | NA            | NA                                                     | 2.159 | 0.0015387 |
| 1437048_x_at | Stxbp2        | syntaxin binding protein 2                             | 2.159 | 0.003185  |
| 1454558_at   | 5430416B10Rik | RIKEN cDNA 5430416B10 gene                             | 2.160 | 0.0047756 |
| 1442477_at   | Ambra1        | autophagy/beclin 1 regulator 1                         | 2.160 | 0.0043992 |
| 1432211_a_at | Fbxo9         | f-box protein 9                                        | 2.161 | 0.0064062 |

|              |               |                                                                                               |       |           |
|--------------|---------------|-----------------------------------------------------------------------------------------------|-------|-----------|
| 1449347_a_at | Xlr4b         | X-linked lymphocyte-regulated 4B                                                              | 2.161 | 0.0041633 |
| 1455337_at   | Fgd4          | FYVE, RhoGEF and PH domain containing 4                                                       | 2.163 | 0.0028102 |
| 1429413_at   | Cpm           | carboxypeptidase M                                                                            | 2.165 | 0.0013401 |
| 1427387_a_at | Itgb4         | integrin beta 4                                                                               | 2.165 | 0.0291415 |
| 1429076_a_at | Gdpd2         | glycerophosphodiester phosphodiesterase domain containing 2                                   | 2.165 | 0.0074928 |
| 1417423_at   | Grina         | glutamate receptor, ionotropic, N-methyl D-aspartate-associated protein 1 (glutamate binding) | 2.166 | 0.0048391 |
| 1433527_at   | Ireb2         | iron responsive element binding protein 2                                                     | 2.166 | 0.0055589 |
| 1434686_at   | D3Ert300e     | DNA segment, Chr 3, ERATO Doi 300, expressed                                                  | 2.166 | 0.0334287 |
| 1438612_a_at | Clps          | colipase, pancreatic                                                                          | 2.167 | 0.0093842 |
| 1457459_at   | AU014973      | expressed sequence AU014973                                                                   | 2.167 | 0.0045148 |
| 1456422_at   | D030011O10Rik | RIKEN cDNA D030011O10 gene                                                                    | 2.168 | 0.0020153 |
| 1417004_at   | Tsg101        | tumor susceptibility gene 101                                                                 | 2.169 | 0.0010605 |
| 1453860_s_at | Nr3c1         | nuclear receptor subfamily 3, group C, member 1                                               | 2.171 | 0.0043132 |

|              |               |                                                                                        |       |           |
|--------------|---------------|----------------------------------------------------------------------------------------|-------|-----------|
| 1437104_at   | Arfgef1       | ADP-ribosylation factor guanine nucleotide-exchange factor 1(brefeldin A-inhibited)    | 2.172 | 0.0223567 |
| 1423175_s_at | Pard6b        | par-6 (partitioning defective 6) homolog beta (C. elegans)                             | 2.174 | 0.0026199 |
| 1448415_a_at | Sema3b        | sema domain, immunoglobulin domain (Ig), short basic domain, secreted, (semaphorin) 3B | 2.174 | 0.0030144 |
| 1426893_at   | C230093N12Rik | RIKEN cDNA C230093N12 gene                                                             | 2.174 | 0.0031718 |
| 1456587_x_at | 2010005J08Rik | RIKEN cDNA 2010005J08 gene                                                             | 2.175 | 0.0030488 |
| 1416412_at   | Nsmaf         | neutral sphingomyelinase (N-SMase) activation associated factor                        | 2.175 | 0.0023644 |
| 1418864_at   | Gata4         | GATA binding protein 4                                                                 | 2.175 | 0.0207946 |
| 1417171_at   | Itk           | IL2-inducible T-cell kinase                                                            | 2.176 | 0.0124183 |
| 1457454_at   | D7Ert602e     | DNA segment, Chr 7, ERATO Doi 602, expressed                                           | 2.177 | 0.0021402 |
| 1437829_s_at | Eef2k         | eukaryotic elongation factor 2 kinase                                                  | 2.177 | 0.0018589 |
| 1427241_at   | Papolg        | poly(A) polymerase gamma                                                               | 2.177 | 0.0011825 |
| 1427311_at   | Bptf          | bromodomain PHD finger transcription factor                                            | 2.178 | 0.0046104 |

|                            |               |                                                        |       |           |
|----------------------------|---------------|--------------------------------------------------------|-------|-----------|
| 1459894_at                 | Iqgap2        | IQ motif containing GTPase activating protein 2        | 2.178 | 0.0026769 |
| 1445626_at                 | NA            | NA                                                     | 2.179 | 0.0038633 |
| 1459332_at                 | Itch          | itchy, E3 ubiquitin protein ligase                     | 2.179 | 0.0019678 |
| 1416380_at                 | Mov10         | Moloney leukemia virus 10                              | 2.180 | 0.0065506 |
| 1424983_a_at               | 2700078E11Rik | RIKEN cDNA 2700078E11 gene                             | 2.180 | 0.0012549 |
| 1445870_at                 | NA            | NA                                                     | 2.180 | 0.0022124 |
| 1437503_a_at               | Shisa5        | shisa homolog 5 (Xenopus laevis)                       | 2.180 | 0.0016213 |
| 1426313_at                 | Bre           | brain and reproductive organ-expressed protein         | 2.182 | 0.0012079 |
| 1451196_at                 | Ypel5         | yippee-like 5 (Drosophila)                             | 2.182 | 0.002454  |
| 1424951_at                 | Baiap2l1      | BAI1-associated protein 2-like 1                       | 2.182 | 0.0013507 |
| 1444951_at                 | Dennd1b       | DENN/MADD domain containing 1B                         | 2.182 | 0.0064705 |
| AFFX-GapdhMur/M3259_9_5_at | Gapdh         | glyceraldehyde-3-phosphate dehydrogenase               | 2.182 | 0.0038292 |
| 1444762_at                 | NA            | NA                                                     | 2.183 | 0.0011581 |
| 1423444_at                 | Rock1         | Rho-associated coiled-coil containing protein kinase 1 | 2.183 | 0.0039442 |
| 1445235_at                 | NA            | NA                                                     | 2.183 | 0.0027214 |
| 1459197_at                 | Cntn1         | contactin 1                                            | 2.184 | 0.0079069 |
| 1437106_at                 | Jarid1a       | jumonji, AT rich interactive domain 1A (Rbp2 like)     | 2.184 | 0.0289501 |

|              |          |                                                                       |       |           |
|--------------|----------|-----------------------------------------------------------------------|-------|-----------|
| 1434575_at   | Epb4.111 | erythrocyte protein band 4.1-like 1                                   | 2.184 | 0.0083239 |
| 1455980_a_at | Gas2l3   | growth arrest-specific 2 like 3                                       | 2.184 | 0.0132311 |
| 1431391_at   | Ralgps1  | Ral GEF with PH domain and SH3 binding motif 1                        | 2.186 | 0.0025244 |
| 1435768_at   | Arid4b   | AT rich interactive domain 4B (RBP1-like)                             | 2.186 | 0.0017517 |
| 1426025_s_at | Laptm5   | lysosomal-associated protein transmembrane 5                          | 2.187 | 0.007861  |
| 1427041_at   | BC013712 | cDNA sequence BC013712                                                | 2.189 | 0.0040594 |
| 1427325_s_at | Akna     | AT-hook transcription factor                                          | 2.189 | 0.0098187 |
| 1451407_at   | Igsf5    | immunoglobulin superfamily, member 5                                  | 2.189 | 0.0056042 |
| 1452103_at   | Arl16    | ADP-ribosylation factor-like 16                                       | 2.189 | 0.0044135 |
| 1426601_at   | Slc37a1  | solute carrier family 37 (glycerol-3-phosphate transporter), member 1 | 2.193 | 0.0014433 |
| 1434751_at   | Ids      | iduronate 2-sulfatase                                                 | 2.194 | 0.0091616 |
| 1450984_at   | Tjp2     | tight junction protein 2                                              | 2.194 | 0.0015877 |
| 1415953_s_at | Mark2    | MAP/microtubule affinity-regulating kinase 2                          | 2.195 | 0.0021669 |
| 1418984_at   | Inadl    | InaD-like (Drosophila)                                                | 2.196 | 0.0021303 |
| 1429241_at   | Npal3    | NIPA-like domain containing 3                                         | 2.196 | 0.0063149 |
| 1451020_at   | Gsk3b    | glycogen synthase kinase 3 beta                                       | 2.197 | 0.0010048 |

|              |               |                                                                         |       |           |
|--------------|---------------|-------------------------------------------------------------------------|-------|-----------|
| 1438220_at   | Foxj3         | forkhead box J3                                                         | 2.198 | 0.0123131 |
| 1454847_at   | Lhfpl2        | lipoma HMGIC fusion partner-like 2                                      | 2.199 | 0.0049175 |
| 1450622_at   | Bcar1         | breast cancer anti-estrogen resistance 1                                | 2.200 | 0.0022037 |
| 1421321_a_at | Net1          | neuroepithelial cell transforming gene 1                                | 2.201 | 0.0040596 |
| 1435454_a_at | BC006779      | cDNA sequence BC006779                                                  | 2.201 | 0.0077488 |
| 1425530_a_at | Stx3          | syntaxin 3                                                              | 2.201 | 0.0061914 |
| 1431128_at   | Tmem170       | transmembrane protein 170                                               | 2.204 | 0.001054  |
| 1453582_at   | Chka          | choline kinase alpha                                                    | 2.205 | 0.001611  |
| 1434137_x_at | 1810010M01Rik | RIKEN cDNA 1810010M01 gene                                              | 2.206 | 0.0030054 |
| 1460585_x_at | Pisd          | phosphatidylserine decarboxylase                                        | 2.208 | 0.0010048 |
| 1436505_at   | Ppig          | peptidyl-prolyl isomerase G (cyclophilin G)                             | 2.209 | 0.0137367 |
| 1460336_at   | Ppargc1a      | peroxisome proliferative activated receptor, gamma, coactivator 1 alpha | 2.209 | 0.0113131 |
| 1425405_a_at | Adar          | adenosine deaminase, RNA-specific                                       | 2.210 | 0.0009104 |
| 1417953_at   | D6Wsu176e     | DNA segment, Chr 6, Wayne State University 176, expressed               | 2.210 | 0.0020947 |
| 1450314_at   | Dqx1          | DEAQ RNA-dependent ATPase                                               | 2.211 | 0.0057402 |
| 1419069_at   | Rabgef1       | RAB guanine nucleotide exchange factor (GEF) 1                          | 2.212 | 0.0016015 |
| 1444366_at   | NA            | NA                                                                      | 2.216 | 0.0040298 |
| 1454967_at   | NA            | NA                                                                      | 2.217 | 0.0013414 |



|              |               |                                                                  |       |           |
|--------------|---------------|------------------------------------------------------------------|-------|-----------|
| 1452594_at   | Dusp11        | dual specificity phosphatase 11 (RNA/RNP complex 1-interacting)  | 2.218 | 0.0014785 |
| 1453313_at   | Sesn3         | sestrin 3                                                        | 2.219 | 0.0166566 |
| 1453738_at   | C330018D20Rik | RIKEN cDNA C330018D20 gene                                       | 2.220 | 0.001263  |
| 1431031_at   | Arid4b        | AT rich interactive domain 4B (RBP1-like)                        | 2.221 | 0.0047279 |
| 1430849_a_at | Cgrrf1        | cell growth regulator with ring finger domain 1                  | 2.222 | 0.0011213 |
| 1438676_at   | Mpa2l         | macrophage activation 2 like                                     | 2.222 | 0.0153937 |
| 1436778_at   | Cybb          | cytochrome b-245, beta polypeptide                               | 2.222 | 0.005441  |
| 1418402_at   | Adam19        | alpha disintegrin and metalloproteinase domain 19 (meltrin beta) | 2.223 | 0.0148432 |
| 1453796_a_at | Ergic2        | ERGIC and golgi 2                                                | 2.223 | 0.0036325 |
| 1450726_at   | Asah2         | N-acylsphingosine amidohydrolase 2                               | 2.224 | 0.004302  |
| 1432195_s_at | Ccnl2         | cyclin L2                                                        | 2.225 | 0.0012073 |
| 1448049_at   | Jmjd1c        | jumonji domain containing 1C                                     | 2.225 | 0.0089841 |
| 1448997_at   | Cyth1         | cytohesin 1                                                      | 2.226 | 0.0191694 |
| 1460151_at   | NA            | NA                                                               | 2.227 | 0.0034521 |
| 1439404_x_at | Zfx           | zinc finger protein X-linked                                     | 2.230 | 0.0012047 |
| 1455886_at   | Cbl           | Casitas B-lineage lymphoma                                       | 2.230 | 0.0158723 |

|              |               |                                                                    |       |           |
|--------------|---------------|--------------------------------------------------------------------|-------|-----------|
| 1443366_at   | Napg          | N-ethylmaleimide sensitive fusion protein attachment protein gamma | 2.230 | 0.0033744 |
| 1421340_at   | Map3k5        | mitogen-activated protein kinase kinase kinase 5                   | 2.230 | 0.0033403 |
| 1429653_at   | Gse1          | genetic suppressor element 1                                       | 2.231 | 0.0078365 |
| 1422045_a_at | Ptpn12        | protein tyrosine phosphatase, non-receptor type 12                 | 2.231 | 0.0027601 |
| 1451466_at   | D16Erd472e    | DNA segment, Chr 16, ERATO Doi 472, expressed                      | 2.232 | 0.0065702 |
| 1422650_a_at | Riok3         | RIO kinase 3 (yeast)                                               | 2.233 | 0.0025685 |
| 1418963_at   | 2310047O13Rik | RIKEN cDNA 2310047O13 gene                                         | 2.233 | 0.0018284 |
| 1439156_at   | Gm962         | gene model 962, (NCBI)                                             | 2.233 | 0.0018576 |
| 1419238_at   | Abca7         | ATP-binding cassette, sub-family A (ABC1), member 7                | 2.234 | 0.0045085 |
| 1427386_at   | Arhgef16      | Rho guanine nucleotide exchange factor (GEF) 16                    | 2.234 | 0.0017354 |
| 1426922_s_at | Hrb           | HIV-1 Rev binding protein                                          | 2.234 | 0.0134105 |
| 1423391_at   | Git2          | G protein-coupled receptor kinase-interactor 2                     | 2.235 | 0.0024204 |
| 1460337_at   | Sh3kbp1       | SH3-domain kinase binding protein 1                                | 2.240 | 0.013271  |

|              |         |                                                              |       |           |
|--------------|---------|--------------------------------------------------------------|-------|-----------|
| 1460204_at   | Tec     | cytoplasmic tyrosine kinase, Dscr28C related (Drosophila)    | 2.240 | 0.0018027 |
| 1460598_at   | Il28ra  | interleukin 28 receptor alpha                                | 2.240 | 0.0007741 |
| 1450033_a_at | Stat1   | signal transducer and activator of transcription 1           | 2.240 | 0.0010226 |
| 1421670_a_at | Irak4   | interleukin-1 receptor-associated kinase 4                   | 2.240 | 0.0008871 |
| 1434917_at   | Cobl    | cordon-bleu                                                  | 2.241 | 0.0046291 |
| 1459704_at   | NA      | NA                                                           | 2.242 | 0.006178  |
| 1446807_at   | Usp50   | ubiquitin specific peptidase 50                              | 2.242 | 0.0036486 |
| 1443721_x_at | Sbno2   | strawberry notch homolog 2 (Drosophila)                      | 2.244 | 0.0023741 |
| 1453744_a_at | Ankrd40 | ankyrin repeat domain 40                                     | 2.245 | 0.0016024 |
| 1427021_s_at | Eif3f   | eukaryotic translation initiation factor 3, subunit F        | 2.245 | 0.0018336 |
| 1452217_at   | Ahnak   | AHNAK nucleoprotein (desmoyokin)                             | 2.245 | 0.0023877 |
| 1455675_a_at | Tial1   | Tia1 cytotoxic granule-associated RNA binding protein-like 1 | 2.246 | 0.0013228 |
| 1441297_at   | NA      | NA                                                           | 2.246 | 0.006469  |
| 1421362_a_at | Frk     | fyn-related kinase                                           | 2.246 | 0.0023281 |
| 1446007_at   | NA      | NA                                                           | 2.250 | 0.0215988 |
| 1426480_at   | Sbds    | Shwachman-Bodian-Diamond syndrome homolog (human)            | 2.250 | 0.001236  |
| 1425895_a_at | Id1     | inhibitor of DNA binding 1                                   | 2.251 | 0.0010897 |

|              |               |                                                                 |       |           |
|--------------|---------------|-----------------------------------------------------------------|-------|-----------|
| 1438735_at   | Rsf1          | remodeling and spacing factor 1                                 | 2.254 | 0.0091261 |
| 1421872_at   | Rab24         | RAB24, member RAS oncogene family                               | 2.255 | 0.0011802 |
| 1427583_at   | 4921505C17Rik | RIKEN cDNA 4921505C17 gene                                      | 2.256 | 0.0104966 |
| 1418875_at   | Syngn4        | synaptogyrin 4                                                  | 2.257 | 0.0145572 |
| 1451564_at   | Parp14        | poly (ADP-ribose) polymerase family, member 14                  | 2.257 | 0.0016569 |
| 1423786_at   | 8430410A17Rik | RIKEN cDNA 8430410A17 gene                                      | 2.259 | 0.0022645 |
| 1429427_s_at | Tcf7l2        | transcription factor 7-like 2, T-cell specific, HMG-box         | 2.260 | 0.0011445 |
| 1420841_at   | Ptpnf         | protein tyrosine phosphatase, receptor type, F                  | 2.261 | 0.0046354 |
| 1422959_s_at | Rnf114        | ring finger protein 114                                         | 2.263 | 0.0007067 |
| 1428351_at   | Ppm1m         | protein phosphatase 1M                                          | 2.263 | 0.0130522 |
| 1456918_at   | Raph1         | Ras association (RalGDS/AF-6) and pleckstrin homology domains 1 | 2.264 | 0.0007318 |
| 1459450_at   | NA            | NA                                                              | 2.265 | 0.0042951 |
| 1440916_at   | 2510049J12Rik | RIKEN cDNA 2510049J12 gene                                      | 2.266 | 0.0008702 |
| 1429716_at   | Zcchc4        | zinc finger, CCHC domain containing 4                           | 2.268 | 0.0029943 |
| 1426587_a_at | Stat3         | signal transducer and activator of transcription 3              | 2.268 | 0.0017956 |

|              |               |                                                                |       |           |
|--------------|---------------|----------------------------------------------------------------|-------|-----------|
| 1439319_at   | Elf1          | E74-like factor 1                                              | 2.268 | 0.0007724 |
| 1451422_at   | Myo18a        | myosin XVIIIa                                                  | 2.268 | 0.0039272 |
| 1431900_a_at | Foxa3         | forkhead box A3                                                | 2.269 | 0.0056481 |
| 1443636_at   | NA            | NA                                                             | 2.271 | 0.0050515 |
| 1436909_at   | Slc25a44      | solute carrier family 25, member 44                            | 2.271 | 0.0023732 |
| 1451567_a_at | Ifi203        | interferon activated gene 203                                  | 2.271 | 0.0055376 |
| 1448892_at   | Dock7         | dedicator of cytokinesis 7                                     | 2.273 | 0.0050753 |
| 1419450_at   | Ormdl3        | ORM1-like 3 (S. cerevisiae)                                    | 2.273 | 0.002894  |
| 1422018_at   | Hivep2        | human immunodeficiency virus type 1 enhancer binding protein 2 | 2.274 | 0.0025331 |
| 1450447_at   | Hnf4a         | hepatic nuclear factor 4, alpha                                | 2.274 | 0.0024175 |
| 1456694_x_at | Ptpn6         | protein tyrosine phosphatase, non-receptor type 6              | 2.274 | 0.0008039 |
| 1453512_at   | 5830407P18Rik | RIKEN cDNA 5830407P18 gene                                     | 2.275 | 0.0067246 |
| 1431035_at   | Daam1         | dishevelled associated activator of morphogenesis 1            | 2.276 | 0.0055231 |
| 1429959_at   | Il10rb        | interleukin 10 receptor, beta                                  | 2.277 | 0.0008555 |
| 1451589_at   | Gats          | opposite strand transcription unit to Stag3                    | 2.279 | 0.0064189 |
| 1428300_at   | Specc1l       | SPECC1-like                                                    | 2.279 | 0.0007569 |
| 1422491_a_at | Bnip2         | BCL2/adenovirus E1B interacting protein 2                      | 2.280 | 0.0008084 |
| 1438657_x_at | Ptp4a1        | protein tyrosine phosphatase 4a1                               | 2.280 | 0.0033159 |

|              |          |                                                            |       |           |
|--------------|----------|------------------------------------------------------------|-------|-----------|
| 1434027_at   | Rcan3    | regulator of calcineurin 3                                 | 2.281 | 0.0028728 |
| 1420909_at   | Vegfa    | vascular endothelial growth factor A                       | 2.281 | 0.001329  |
| 1449981_a_at | Nat2     | N-acetyltransferase 2 (arylamine N-acetyltransferase)      | 2.283 | 0.0009864 |
| 1418154_at   | N4bp1    | NEDD4 binding protein 1                                    | 2.284 | 0.0027342 |
| 1439475_at   | Zfp429   | zinc finger protein 429                                    | 2.286 | 0.0034988 |
| 1448406_at   | Eid1     | EP300 interacting inhibitor of differentiation 1           | 2.287 | 0.013646  |
| 1442700_at   | Pde4b    | phosphodiesterase 4B, cAMP specific                        | 2.288 | 0.0083347 |
| 1416432_at   | Pfkfb3   | 6-phosphofructo-2-kinase/fructose-2,6-biphosphatase 3      | 2.288 | 0.0010748 |
| 1415784_at   | Vps35    | vacuolar protein sorting 35                                | 2.288 | 0.003918  |
| 1439998_at   | Jmjd1c   | jumonji domain containing 1C                               | 2.288 | 0.000989  |
| 1437185_s_at | Tmsb10   | thymosin, beta 10                                          | 2.289 | 0.002113  |
| 1439397_at   | Fmn1     | formin 1                                                   | 2.289 | 0.0037827 |
| 1445589_at   | NA       | NA                                                         | 2.290 | 0.0014412 |
| 1435665_at   | AI451617 | expressed sequence AI451617                                | 2.290 | 0.0018098 |
| 1432007_s_at | Ap2a2    | adaptor protein complex AP-2, alpha 2 subunit              | 2.291 | 0.0033162 |
| 1426951_at   | Crim1    | cysteine rich transmembrane BMP regulator 1 (chordin like) | 2.291 | 0.0027248 |

|              |               |                                                       |       |           |
|--------------|---------------|-------------------------------------------------------|-------|-----------|
| 1425803_a_at | Mbd2          | methyl-CpG binding domain protein 2                   | 2.292 | 0.0006737 |
| 1435979_a_at | Myo15b        | myosin XVB                                            | 2.292 | 0.0095335 |
| 1415795_at   | Spin1         | spindlin 1                                            | 2.292 | 0.0015418 |
| 1427121_at   | Fbxo4         | F-box protein 4                                       | 2.293 | 0.0041956 |
| 1455204_at   | Pitpnc1       | phosphatidylinositol transfer protein, cytoplasmic 1  | 2.293 | 0.0014634 |
| 1432212_at   | A1cf          | APOBEC1 complementation factor                        | 2.293 | 0.0012749 |
| 1452404_at   | Phactr2       | phosphatase and actin regulator 2                     | 2.295 | 0.0008395 |
| 1416317_a_at | Stampb        | Stam binding protein                                  | 2.296 | 0.0007277 |
| 1450915_at   | Ap3b1         | adaptor-related protein complex 3, beta 1 subunit     | 2.296 | 0.0013061 |
| 1427488_a_at | Birc6         | baculoviral IAP repeat-containing 6                   | 2.296 | 0.0067697 |
| 1457178_at   | NA            | NA                                                    | 2.296 | 0.0008191 |
| 1430533_a_at | Ctnnb1        | catenin (cadherin associated protein), beta 1         | 2.297 | 0.0010378 |
| 1417626_at   | Pde4dip       | phosphodiesterase 4D interacting protein (myomegalin) | 2.298 | 0.0027355 |
| 1445862_at   | 4921513D23Rik | RIKEN cDNA 4921513D23 gene                            | 2.299 | 0.0007549 |
| 1440929_at   | Ggnbp2        | gametogenetin binding protein 2                       | 2.299 | 0.0005975 |
| 1439124_at   | Wdr91         | WD repeat domain 91                                   | 2.299 | 0.0046022 |
| 1449127_at   | Selplg        | selectin, platelet (p-selectin) ligand                | 2.303 | 0.0038241 |
| 1426477_at   | Rasa1         | RAS p21 protein activator 1                           | 2.303 | 0.0044918 |

|              |               |                                                              |       |           |
|--------------|---------------|--------------------------------------------------------------|-------|-----------|
| 1433514_at   | Etnk1         | ethanolamine kinase 1                                        | 2.304 | 0.0012389 |
| 1453358_s_at | Amn1          | antagonist of mitotic exit network 1 homolog (S. cerevisiae) | 2.305 | 0.0059913 |
| 1432845_at   | NA            | NA                                                           | 2.305 | 0.0273758 |
| 1431802_a_at | D5Wsu178e     | DNA segment, Chr 5, Wayne State University 178, expressed    | 2.307 | 0.001001  |
| 1449626_s_at | Acbd4         | acyl-Coenzyme A binding domain containing 4                  | 2.308 | 0.0012905 |
| 1455331_at   | Plekhm3       | pleckstrin homology domain containing, family M, member 3    | 2.308 | 0.005199  |
| 1454655_at   | Dgkd          | diacylglycerol kinase, delta                                 | 2.308 | 0.0035852 |
| 1425329_a_at | Cyb5r3        | cytochrome b5 reductase 3                                    | 2.308 | 0.0021276 |
| 1432477_at   | 4930412D23Rik | RIKEN cDNA 4930412D23 gene                                   | 2.309 | 0.0047319 |
| 1456821_at   | NA            | NA                                                           | 2.313 | 0.0050578 |
| 1451150_at   | Zfp410        | zinc finger protein 410                                      | 2.313 | 0.001738  |
| 1425635_at   | Tnk1          | tyrosine kinase, non-receptor, 1                             | 2.315 | 0.000642  |
| 1420426_at   | Myo7b         | myosin VIIb                                                  | 2.315 | 0.0019441 |
| 1459904_at   | BC030870      | cDNA sequence BC030870                                       | 2.316 | 0.0014762 |
| 1450247_a_at | Scamp5        | secretory carrier membrane protein 5                         | 2.317 | 0.0010087 |
| 1418144_a_at | Pip5k1a       | phosphatidylinositol-4-phosphate 5-kinase, type 1 alpha      | 2.317 | 0.0015887 |



|              |               |                                                                      |       |           |
|--------------|---------------|----------------------------------------------------------------------|-------|-----------|
| 1416950_at   | Tnfaip8       | tumor necrosis factor, alpha-induced protein 8                       | 2.317 | 0.0012215 |
| 1418073_at   | Acot9         | acyl-CoA thioesterase 9                                              | 2.318 | 0.0035321 |
| 1418483_a_at | Ggta1         | glycoprotein galactosyltransferase alpha 1, 3                        | 2.318 | 0.0138834 |
| 1449934_at   | Pura          | purine rich element binding protein A                                | 2.318 | 0.000716  |
| 1452833_at   | Rapgef2       | Rap guanine nucleotide exchange factor (GEF) 2                       | 2.320 | 0.0019376 |
| 1427979_at   | 4732418C07Rik | RIKEN cDNA 4732418C07 gene                                           | 2.320 | 0.0067216 |
| 1452813_a_at | Tmem188       | transmembrane protein 188                                            | 2.321 | 0.0062631 |
| 1457485_at   | NA            | NA                                                                   | 2.322 | 0.0026472 |
| 1422702_at   | Azin1         | antizyme inhibitor 1                                                 | 2.326 | 0.0021709 |
| 1455021_at   | Gabbr1        | gamma-aminobutyric acid (GABA-B) receptor, 1                         | 2.327 | 0.0039008 |
| 1432651_at   | 2510019K15Rik | RIKEN cDNA 2510019K15 gene                                           | 2.327 | 0.0014279 |
| 1460063_at   | D5Erd798e     | DNA segment, Chr 5, ERATO Doi 798, expressed                         | 2.328 | 0.0007201 |
| 1427319_at   | A230046K03Rik | RIKEN cDNA A230046K03 gene                                           | 2.328 | 0.004241  |
| 1450101_a_at | Magi3         | membrane associated guanylate kinase, WW and PDZ domain containing 3 | 2.329 | 0.0035494 |
| 1422661_at   | Lgals8        | lectin, galactose binding, soluble 8                                 | 2.330 | 0.0011103 |
| 1426879_at   | 1190005F20Rik | RIKEN cDNA 1190005F20 gene                                           | 2.330 | 0.0015779 |

|              |               |                                                     |       |           |
|--------------|---------------|-----------------------------------------------------|-------|-----------|
| 1428792_at   | Bcas1         | breast carcinoma amplified sequence 1               | 2.331 | 0.0031244 |
| 1457900_at   | Ascc3         | activating signal cointegrator 1 complex subunit 3  | 2.331 | 0.0065913 |
| 1451179_a_at | Qk            | quaking                                             | 2.332 | 0.004662  |
| 1424575_at   | Rabl5         | RAB, member of RAS oncogene family-like 5           | 2.332 | 0.0016807 |
| 1424294_at   | Ppp4r1        | protein phosphatase 4, regulatory subunit 1         | 2.332 | 0.0013466 |
| 1457793_a_at | Whsc1l1       | Wolf-Hirschhorn syndrome candidate 1-like 1 (human) | 2.333 | 0.0009159 |
| 1454915_at   | Rab3gap2      | RAB3 GTPase activating protein subunit 2            | 2.334 | 0.0013023 |
| 1430671_a_at | 0610010K06Rik | RIKEN cDNA 0610010K06 gene                          | 2.334 | 0.0012161 |
| 1437020_at   | Ep400         | E1A binding protein p400                            | 2.335 | 0.0030322 |
| 1424451_at   | Acaa1b        | acetyl-Coenzyme A acyltransferase 1B                | 2.337 | 0.0111749 |
| 1425392_a_at | Nr1i3         | nuclear receptor subfamily 1, group I, member 3     | 2.337 | 0.0014403 |
| 1438279_at   | Dpp4          | dipeptidylpeptidase 4                               | 2.338 | 0.0005807 |
| 1419879_s_at | Trim25        | tripartite motif-containing 25                      | 2.338 | 0.001788  |
| 1443863_at   | Fndc3a        | fibronectin type III domain containing 3a           | 2.339 | 0.0015008 |
| 1418432_at   | Cab39         | calcium binding protein 39                          | 2.341 | 0.0014587 |
| 1443792_at   | Tsga14        | testis specific gene A14                            | 2.342 | 0.0022672 |

|              |           |                                                                       |       |           |
|--------------|-----------|-----------------------------------------------------------------------|-------|-----------|
| 1449095_at   | Vps54     | vacuolar protein sorting 54 (yeast)                                   | 2.342 | 0.0032809 |
| 1439150_x_at | Grtp1     | GH regulated TBC protein 1                                            | 2.342 | 0.0038701 |
| 1421989_s_at | Papss2    | 3-adenosine 5-phosphosulfate synthase 2                               | 2.343 | 0.0027281 |
| 1440547_at   | NA        | NA                                                                    | 2.344 | 0.0009689 |
| 1447507_at   | C80406    | expressed sequence C80406                                             | 2.344 | 0.0044241 |
| 1449988_at   | Gimap1    | GTPase, IMAP family member 1                                          | 2.345 | 0.0015388 |
| 1424268_at   | Smox      | spermine oxidase                                                      | 2.347 | 0.0011218 |
| 1421845_at   | Golph3    | golgi phosphoprotein 3                                                | 2.352 | 0.0035761 |
| 1442901_at   | Tax1bp1   | Tax1 (human T-cell leukemia virus type I) binding protein 1           | 2.353 | 0.0009078 |
| 1429327_at   | Sdccag1   | serologically defined colon cancer antigen 1                          | 2.354 | 0.0033116 |
| 1449354_at   | Zrsr1     | zinc finger (CCCH type), RNA binding motif and serine/arginine rich 1 | 2.358 | 0.0018084 |
| 1416927_at   | Trp53inp1 | transformation related protein 53 inducible nuclear protein 1         | 2.359 | 0.0032553 |
| 1450700_at   | Cdc42ep3  | CDC42 effector protein (Rho GTPase binding) 3                         | 2.361 | 0.0049072 |
| 1422910_s_at | Smc6      | structural maintenance of chromosomes 6                               | 2.361 | 0.0122567 |

|              |               |                                                             |       |           |
|--------------|---------------|-------------------------------------------------------------|-------|-----------|
| 1447930_at   | Baz1a         | bromodomain adjacent to zinc finger domain 1A               | 2.364 | 0.0027636 |
| 1438471_at   | NA            | NA                                                          | 2.364 | 0.002387  |
| 1433805_at   | Jak1          | Janus kinase 1                                              | 2.365 | 0.0015203 |
| 1420175_at   | Tax1bp1       | Tax1 (human T-cell leukemia virus type I) binding protein 1 | 2.366 | 0.0067467 |
| 1431566_at   | 9030622O22Rik | RIKEN cDNA 9030622O22 gene                                  | 2.366 | 0.0036478 |
| 1434069_at   | BC067047      | cDNA sequence BC067047                                      | 2.366 | 0.0012545 |
| 1439467_at   | NA            | NA                                                          | 2.367 | 0.0005046 |
| 1417566_at   | Abhd5         | abhydrolase domain containing 5                             | 2.369 | 0.0038184 |
| 1434086_at   | Gpr107        | G protein-coupled receptor 107                              | 2.369 | 0.0006744 |
| 1419664_at   | Srr           | serine racemase                                             | 2.370 | 0.0024254 |
| 1438868_at   | Phf11         | PHD finger protein 11                                       | 2.372 | 0.0007995 |
| 1456940_at   | Slc43a2       | solute carrier family 43, member 2                          | 2.375 | 0.0104286 |
| 1418461_at   | Sh3d19        | SH3 domain protein D19                                      | 2.375 | 0.0013374 |
| 1437129_at   | E330018D03Rik | RIKEN cDNA E330018D03 gene                                  | 2.376 | 0.0012016 |
| 1416062_at   | Tbc1d15       | TBC1 domain family, member 15                               | 2.376 | 0.0037096 |
| 1416542_at   | Phf1          | PHD finger protein 1                                        | 2.376 | 0.0078299 |
| 1416872_at   | Tspan6        | tetraspanin 6                                               | 2.377 | 0.0005474 |
| 1440191_s_at | Leng9         | leukocyte receptor cluster (LRC) member 9                   | 2.377 | 0.0030937 |
| 1438736_at   | Thoc2         | THO complex 2                                               | 2.380 | 0.0124696 |

|              |               |                                                                           |       |           |
|--------------|---------------|---------------------------------------------------------------------------|-------|-----------|
| 1428479_at   | Nfatc1        | nuclear factor of activated T-cells, cytoplasmic, calcineurin-dependent 1 | 2.382 | 0.0008383 |
| 1425465_a_at | Senp2         | SUMO/sentrin specific peptidase 2                                         | 2.384 | 0.0016688 |
| 1430523_s_at | Igl-V1        | immunoglobulin lambda chain, variable 1                                   | 2.384 | 0.0104588 |
| 1423555_a_at | lfi44         | interferon-induced protein 44                                             | 2.385 | 0.0005507 |
| 1438497_at   | Mfsd8         | major facilitator superfamily domain containing 8                         | 2.385 | 0.0010248 |
| 1417434_at   | Gpd2          | glycerol phosphate dehydrogenase 2, mitochondrial                         | 2.387 | 0.0025599 |
| 1419446_at   | Tbc1d1        | TBC1 domain family, member 1                                              | 2.387 | 0.0006445 |
| 1451115_at   | Pias3         | protein inhibitor of activated STAT 3                                     | 2.388 | 0.0005087 |
| 1420896_at   | Snap23        | synaptosomal-associated protein 23                                        | 2.390 | 0.0008734 |
| 1457508_at   | C430003N24Rik | RIKEN cDNA C430003N24 gene                                                | 2.391 | 0.0011956 |
| 1437200_at   | Fcho2         | FCH domain only 2                                                         | 2.392 | 0.0023728 |
| 1425135_a_at | Dnm2          | dynamamin 2                                                               | 2.392 | 0.0022187 |
| 1421457_a_at | Samsn1        | SAM domain, SH3 domain and nuclear localization signals, 1                | 2.392 | 0.0048561 |
| 1441236_at   | Slc9a3        | solute carrier family 9 (sodium/hydrogen exchanger), member 3             | 2.392 | 0.0015264 |
| 1442387_at   | NA            | NA                                                                        | 2.394 | 0.0122966 |

|              |               |                                                              |       |           |
|--------------|---------------|--------------------------------------------------------------|-------|-----------|
| 1419479_at   | Sectm1b       | secreted and transmembrane 1B                                | 2.395 | 0.0061352 |
| 1427002_s_at | Arsg          | arylsulfatase G                                              | 2.395 | 0.00077   |
| 1449949_a_at | Cxadr         | coxsackievirus and adenovirus receptor                       | 2.396 | 0.0005525 |
| 1434828_at   | B430201A12Rik | RIKEN cDNA B430201A12 gene                                   | 2.397 | 0.0008889 |
| 1435342_at   | Kcnk6         | potassium inwardly-rectifying channel, subfamily K, member 6 | 2.399 | 0.0011888 |
| 1431131_s_at | A630007B06Rik | RIKEN cDNA A630007B06 gene                                   | 2.401 | 0.0131342 |
| 1447839_x_at | Adm           | adrenomedullin                                               | 2.401 | 0.0146432 |
| 1454107_a_at | Kif2a         | kinesin family member 2A                                     | 2.401 | 0.0025247 |
| 1445708_x_at | 3110021A11Rik | RIKEN cDNA 3110021A11 gene                                   | 2.402 | 0.0025619 |
| 1434068_s_at | AI662270      | expressed sequence AI662270                                  | 2.402 | 0.0031501 |
| 1419305_a_at | Fbxo36        | F-box protein 36                                             | 2.402 | 0.0089609 |
| 1450459_at   | 2010106G01Rik | RIKEN cDNA 2010106G01 gene                                   | 2.404 | 0.0149924 |
| 1419092_a_at | Slk           | STE20-like kinase (yeast)                                    | 2.405 | 0.0011577 |
| 1425483_at   | Tox           | thymocyte selection-associated high mobility group box       | 2.405 | 0.0038548 |
| 1444175_at   | NA            | NA                                                           | 2.407 | 0.0025686 |
| 1447179_at   | NA            | NA                                                           | 2.409 | 0.0021799 |
| 1417213_a_at | Rbm6          | RNA binding motif protein 6                                  | 2.409 | 0.0003892 |
| 1434652_at   | Cdc42bpb      | Cdc42 binding protein kinase beta                            | 2.411 | 0.000792  |
| 1458618_at   | NA            | NA                                                           | 2.413 | 0.0009964 |
| 1447744_s_at | 1700110K17Rik | RIKEN cDNA 1700110K17 gene                                   | 2.413 | 0.0038153 |

|              |               |                                                                                                                        |       |           |
|--------------|---------------|------------------------------------------------------------------------------------------------------------------------|-------|-----------|
| 1428383_a_at | 2310021P13Rik | RIKEN cDNA<br>2310021P13<br>gene                                                                                       | 2.419 | 0.0027205 |
| 1417279_at   | Itpr1         | inositol 1,4,5-<br>triphosphate<br>receptor 1                                                                          | 2.422 | 0.0005602 |
| 1430017_at   | 1600016N20Rik | RIKEN cDNA<br>1600016N20<br>gene                                                                                       | 2.423 | 0.0007957 |
| 1448748_at   | Plek          | pleckstrin                                                                                                             | 2.423 | 0.0084925 |
| 1456493_at   | MGC118608     | similar to Sp110<br>nuclear body<br>protein                                                                            | 2.424 | 0.009587  |
| 1423486_at   | Cript         | cysteine-rich<br>PDZ-binding<br>protein                                                                                | 2.425 | 0.0011082 |
| 1450478_a_at | Ptpn12        | protein tyrosine<br>phosphatase,<br>non-receptor<br>type 12                                                            | 2.425 | 0.0004456 |
| 1427532_at   | Trat1         | T cell receptor<br>associated<br>transmembrane<br>adaptor 1                                                            | 2.428 | 0.0215279 |
| 1452784_at   | Itgav         | integrin alpha V                                                                                                       | 2.428 | 0.0006331 |
| 1445299_at   | NA            | NA                                                                                                                     | 2.428 | 0.0019962 |
| 1449303_at   | Sesn3         | sestrin 3                                                                                                              | 2.429 | 0.0003532 |
| 1417621_at   | Nfatc1        | nuclear factor of<br>activated T-<br>cells,<br>cytoplasmic,<br>calcineurin-<br>dependent 1                             | 2.430 | 0.0162615 |
| 1445178_at   | Sh3rf1        | SH3 domain<br>containing ring<br>finger 1                                                                              | 2.430 | 0.0022893 |
| 1420839_at   | Plekha3       | pleckstrin<br>homology<br>domain-<br>containing,<br>family A<br>(phosphoinositid<br>e binding<br>specific)<br>member 3 | 2.430 | 0.0025649 |
| 1415737_at   | Rfk           | riboflavin kinase                                                                                                      | 2.430 | 0.0008302 |

|              |               |                                                                                     |       |           |
|--------------|---------------|-------------------------------------------------------------------------------------|-------|-----------|
| 1451520_at   | Spg20         | spastic paraplegia 20, spartin (Troyer syndrome) homolog (human)                    | 2.431 | 0.0015624 |
| 1417982_at   | Insig2        | insulin induced gene 2                                                              | 2.432 | 0.0024173 |
| 1427016_at   | 4932438A13Rik | RIKEN cDNA 4932438A13 gene                                                          | 2.432 | 0.0003209 |
| 1423140_at   | Lipa          | lysosomal acid lipase A                                                             | 2.433 | 0.0084391 |
| 1432918_at   | 4921511E18Rik | RIKEN cDNA 4921511E18 gene                                                          | 2.434 | 0.0023595 |
| 1450973_s_at | Mapkbp1       | mitogen-activated protein kinase binding protein 1                                  | 2.434 | 0.0018449 |
| 1425567_a_at | Anxa5         | annexin A5                                                                          | 2.435 | 0.0029173 |
| 1436589_x_at | Prkd2         | protein kinase D2                                                                   | 2.436 | 0.0030612 |
| 1423661_s_at | Ctdsp2        | CTD (carboxy-terminal domain, RNA polymerase II, polypeptide A) small phosphatase 2 | 2.436 | 0.0014656 |
| 1418627_at   | Gclm          | glutamate-cysteine ligase , modifier subunit                                        | 2.437 | 0.0014443 |
| 1428696_at   | Rftn1         | raftlin lipid raft linker 1                                                         | 2.438 | 0.005926  |
| 1437864_at   | Adipor2       | adiponectin receptor 2                                                              | 2.439 | 0.0007045 |
| 1457026_at   | Liph          | lipase, member H                                                                    | 2.439 | 0.0005288 |
| 1448939_at   | Usp25         | ubiquitin specific peptidase 25                                                     | 2.441 | 0.0006297 |
| 1450695_at   | Ahr           | aryl-hydrocarbon receptor                                                           | 2.442 | 0.0016655 |
| 1419393_at   | Abcg5         | ATP-binding cassette, sub-family G (WHITE), member 5                                | 2.442 | 0.0011252 |



|              |          |                                                                                            |       |           |
|--------------|----------|--------------------------------------------------------------------------------------------|-------|-----------|
| 1416639_at   | Slc2a5   | solute carrier family 2 (facilitated glucose transporter), member 5                        | 2.442 | 0.001504  |
| 1455476_a_at | Gse1     | genetic suppressor element 1                                                               | 2.442 | 0.0004822 |
| 1459829_x_at | BC031781 | cDNA sequence BC031781                                                                     | 2.442 | 0.008657  |
| 1443057_at   | NA       | NA                                                                                         | 2.444 | 0.0009725 |
| 1437274_at   | Copa     | coatamer protein complex subunit alpha                                                     | 2.444 | 0.0004266 |
| 1422638_s_at | Rassf5   | Ras association (RalGDS/AF-6) domain family member 5                                       | 2.445 | 0.000885  |
| 1421129_a_at | Atp2a3   | ATPase, Ca <sup>++</sup> transporting, ubiquitous                                          | 2.446 | 0.0017268 |
| 1448783_at   | Slc7a9   | solute carrier family 7 (cationic amino acid transporter, y <sup>+</sup> system), member 9 | 2.446 | 0.0015214 |
| 1422677_at   | Dgat2    | diacylglycerol O-acyltransferase 2                                                         | 2.447 | 0.0005278 |
| 1437856_at   | Ipmk     | inositol polyphosphate multikinase                                                         | 2.448 | 0.0024887 |
| 1420931_at   | Mapk8    | mitogen-activated protein kinase 8                                                         | 2.449 | 0.003461  |
| 1439298_at   | NA       | NA                                                                                         | 2.449 | 0.0008716 |
| 1457209_at   | Ddhd2    | DDHD domain containing 2                                                                   | 2.450 | 0.000382  |
| 1422943_a_at | Hspb1    | heat shock protein 1                                                                       | 2.450 | 0.0011086 |
| 1419587_s_at | Rp2h     | retinitis pigmentosa 2 homolog (human)                                                     | 2.450 | 0.0059788 |

|              |         |                                                                                                   |       |           |
|--------------|---------|---------------------------------------------------------------------------------------------------|-------|-----------|
| 1430804_at   | Slc13a1 | solute carrier family 13 (sodium/sulfate symporters), member 1                                    | 2.451 | 0.0003744 |
| 1448008_at   | Ankhd1  | ankyrin repeat and KH domain containing 1                                                         | 2.452 | 0.0005266 |
| 1449474_a_at | Nelf    | nasal embryonic LHRH factor                                                                       | 2.454 | 0.0015427 |
| 1425528_at   | Prrx1   | paired related homeobox 1                                                                         | 2.455 | 0.0033693 |
| 1441090_at   | Numa1   | nuclear mitotic apparatus protein 1                                                               | 2.458 | 0.0028383 |
| 1449839_at   | Casp3   | caspase 3                                                                                         | 2.459 | 0.000617  |
| 1438771_at   | Brd1    | bromodomain containing 1                                                                          | 2.459 | 0.0004998 |
| 1425118_at   | Spire2  | spire homolog 2 (Drosophila)                                                                      | 2.461 | 0.0050456 |
| 1452742_at   | Trak1   | trafficking protein, kinesin binding 1                                                            | 2.461 | 0.0009821 |
| 1431507_a_at | Synj2bp | synaptojanin 2 binding protein                                                                    | 2.461 | 0.001464  |
| 1419128_at   | Itgax   | integrin alpha X                                                                                  | 2.463 | 0.0040332 |
| 1440972_at   | Nsd1    | nuclear receptor-binding SET-domain protein 1                                                     | 2.463 | 0.0028728 |
| 1418431_at   | Kif5b   | kinesin family member 5B                                                                          | 2.464 | 0.0032059 |
| 1422455_s_at | Nsf     | N-ethylmaleimide sensitive fusion protein                                                         | 2.464 | 0.0027907 |
| 1436984_at   | Abi2    | abl-interactor 2                                                                                  | 2.468 | 0.0032724 |
| 1452333_at   | Smarca2 | SWI/SNF related, matrix associated, actin dependent regulator of chromatin, subfamily a, member 2 | 2.469 | 0.0018    |

|              |               |                                                          |       |           |
|--------------|---------------|----------------------------------------------------------|-------|-----------|
| 1416568_a_at | Acin1         | apoptotic chromatin condensation inducer 1               | 2.469 | 0.000461  |
| 1419971_s_at | Slc35a5       | solute carrier family 35, member A5                      | 2.470 | 0.0010065 |
| 1426923_at   | Hrb           | HIV-1 Rev binding protein                                | 2.470 | 0.0007511 |
| 1445571_at   | NA            | NA                                                       | 2.471 | 0.0008453 |
| 1419167_at   | Prap1         | proline-rich acidic protein 1                            | 2.472 | 0.0002844 |
| 1415805_at   | Clps          | colipase, pancreatic                                     | 2.473 | 0.0013584 |
| 1439805_at   | Nfat5         | nuclear factor of activated T-cells 5                    | 2.478 | 0.000893  |
| 1423240_at   | Src           | Rous sarcoma oncogene                                    | 2.479 | 0.0028363 |
| 1438999_a_at | Nfat5         | nuclear factor of activated T-cells 5                    | 2.480 | 0.0003961 |
| 1423613_at   | Ssfa2         | sperm specific antigen 2                                 | 2.480 | 0.000425  |
| 1448037_at   | NA            | NA                                                       | 2.481 | 0.001401  |
| 1434153_at   | Shb           | src homology 2 domain-containing transforming protein B  | 2.481 | 0.0012082 |
| 1417219_s_at | Tmsb10        | thymosin, beta 10                                        | 2.481 | 0.0010986 |
| 1428324_at   | Gpd2          | glycerol phosphate dehydrogenase 2, mitochondrial        | 2.481 | 0.0003352 |
| 1415919_at   | Npdc1         | neural proliferation, differentiation and control gene 1 | 2.481 | 0.0008396 |
| 1417142_at   | 4932442K08Rik | RIKEN cDNA 4932442K08 gene                               | 2.483 | 0.0002756 |
| 1439129_at   | Dock5         | dedicator of cytokinesis 5                               | 2.483 | 0.0015099 |

|              |               |                                                                     |       |           |
|--------------|---------------|---------------------------------------------------------------------|-------|-----------|
| 1452381_at   | Creb3l2       | cAMP responsive element binding protein 3-like 2                    | 2.484 | 0.0004242 |
| 1445778_at   | NA            | NA                                                                  | 2.484 | 0.0014786 |
| 1419974_at   | Scp2          | sterol carrier protein 2, liver                                     | 2.486 | 0.0014086 |
| 1425686_at   | Cflar         | CASP8 and FADD-like apoptosis regulator                             | 2.487 | 0.0019607 |
| 1425556_at   | Crkrs         | Cdc2-related kinase, arginine/serine-rich                           | 2.488 | 0.0008184 |
| 1434873_a_at | Centb1        | centaurin, beta 1                                                   | 2.490 | 0.0052074 |
| 1430890_at   | 2210010C17Rik | RIKEN cDNA 2210010C17 gene                                          | 2.491 | 0.0009009 |
| 1451361_a_at | Pnpla7        | patatin-like phospholipase domain containing 7                      | 2.495 | 0.0002697 |
| 1455128_x_at | Tnrc6a        | trinucleotide repeat containing 6a                                  | 2.498 | 0.0002751 |
| 1436607_a_at | C330002I19Rik | RIKEN cDNA C330002I19 gene                                          | 2.498 | 0.003523  |
| 1429639_at   | Prei4         | preimplantation protein 4                                           | 2.498 | 0.0012898 |
| 1452694_at   | Ihpk1         | inositol hexaphosphate kinase 1                                     | 2.500 | 0.0005957 |
| 1426184_a_at | Pdcd6ip       | programmed cell death 6 interacting protein                         | 2.501 | 0.001054  |
| 1443199_at   | Lrch3         | leucine-rich repeats and calponin homology (CH) domain containing 3 | 2.501 | 0.0003447 |
| 1447059_at   | NA            | NA                                                                  | 2.501 | 0.0010163 |
| 1425456_a_at | Map2k3        | mitogen-activated protein kinase kinase 3                           | 2.502 | 0.0005601 |

|              |               |                                                    |       |           |
|--------------|---------------|----------------------------------------------------|-------|-----------|
| 1428829_at   | 6820401H01Rik | RIKEN cDNA<br>6820401H01<br>gene                   | 2.502 | 0.0008447 |
| 1449399_a_at | Il1b          | interleukin 1<br>beta                              | 2.502 | 0.0024836 |
| 1451717_s_at | Senp2         | SUMO/sentrin<br>specific<br>peptidase 2            | 2.503 | 0.0076    |
| 1442061_at   | Btbd7         | BTB (POZ)<br>domain<br>containing 7                | 2.503 | 0.0010332 |
| 1425120_x_at | 1810023F06Rik | RIKEN cDNA<br>1810023F06<br>gene                   | 2.504 | 0.0005247 |
| 1449403_at   | Pde9a         | phosphodiesterase<br>9A                            | 2.505 | 0.0006893 |
| 1447304_at   | NA            | NA                                                 | 2.505 | 0.0091766 |
| 1417090_at   | Rcn1          | reticulocalbin 1                                   | 2.506 | 0.0005647 |
| 1433462_a_at | Pi4k2a        | phosphatidylinositol<br>4-kinase<br>type 2 alpha   | 2.507 | 0.0015462 |
| 1416308_at   | Ugdh          | UDP-glucose<br>dehydrogenase                       | 2.509 | 0.001776  |
| 1437491_at   | Bicd2         | bicaudal D<br>homolog 2<br>(Drosophila)            | 2.509 | 0.0082896 |
| 1455497_at   | Leng9         | leukocyte<br>receptor cluster<br>(LRC) member<br>9 | 2.512 | 0.0007108 |
| 1424927_at   | Glipr1        | GLI<br>pathogenesis-<br>related 1<br>(glioma)      | 2.512 | 0.0005313 |
| 1450872_s_at | Lipa          | lysosomal acid<br>lipase A                         | 2.512 | 0.0004786 |
| 1418762_at   | Cd55          | CD55 antigen                                       | 2.512 | 0.0017658 |
| 1428347_at   | Cyfp2         | cytoplasmic<br>FMR1<br>interacting<br>protein 2    | 2.514 | 0.0021445 |
| 1426777_a_at | Wasl          | Wiskott-Aldrich<br>syndrome-like<br>(human)        | 2.515 | 0.0007775 |
| 1453021_at   | Stxbp5        | syntaxin binding<br>protein 5<br>(tomosyn)         | 2.516 | 0.0006563 |
| 1431100_at   | Rinl          | Ras and Rab<br>interactor-like                     | 2.518 | 0.0015045 |

|              |          |                                                              |       |           |
|--------------|----------|--------------------------------------------------------------|-------|-----------|
| 1429796_at   | Kalrn    | kalirin, RhoGEF kinase                                       | 2.520 | 0.0008154 |
| 1427526_at   | Fgfr1op2 | FGFR1 oncogene partner 2                                     | 2.520 | 0.0024412 |
| 1437317_at   | Ube1l    | ubiquitin-activating enzyme E1-like                          | 2.521 | 0.0012221 |
| 1430357_at   | H3f3b    | H3 histone, family 3B                                        | 2.522 | 0.0003707 |
| 1455105_at   | Ptpn12   | protein tyrosine phosphatase, non-receptor type 12           | 2.522 | 0.0006061 |
| 1453737_at   | Wipf2    | WAS/WASL interacting protein family, member 2                | 2.524 | 0.0016221 |
| 1459488_at   | NA       | NA                                                           | 2.524 | 0.0021201 |
| 1437756_at   | Gimap9   | GTPase, IMAP family member 9                                 | 2.526 | 0.0008242 |
| 1430388_a_at | Sulf2    | sulfatase 2                                                  | 2.527 | 0.0004035 |
| 1454075_s_at | Nudt13   | nudix (nucleoside diphosphate linked moiety X)-type motif 13 | 2.530 | 0.0011362 |
| 1429537_at   | Sfrs18   | splicing factor, arginine/serine-rich 18                     | 2.531 | 0.0002113 |
| 1446689_at   | Nlrc3    | NLR family, CARD domain containing 3                         | 2.533 | 0.010224  |
| 1422975_at   | Mme      | membrane metallo endopeptidase                               | 2.537 | 0.000823  |
| 1419039_at   | Cyp2d22  | cytochrome P450, family 2, subfamily d, polypeptide 22       | 2.538 | 0.0020469 |
| 1458039_at   | NA       | NA                                                           | 2.541 | 0.0015333 |
| 1448029_at   | Tbx3     | T-box 3                                                      | 2.542 | 0.000394  |
| 1446735_at   | Itsn2    | intersectin 2                                                | 2.543 | 0.0015126 |
| 1418183_a_at | Cyth1    | cytohesin 1                                                  | 2.544 | 0.0005365 |

|              |               |                                                                 |       |           |
|--------------|---------------|-----------------------------------------------------------------|-------|-----------|
| 1416794_at   | Arl6ip2       | ADP-ribosylation factor-like 6 interacting protein 2            | 2.544 | 0.0007039 |
| 1439244_a_at | Tnrc6a        | trinucleotide repeat containing 6a                              | 2.544 | 0.0002545 |
| 1417061_at   | Slc40a1       | solute carrier family 40 (iron-regulated transporter), member 1 | 2.546 | 0.0043548 |
| 1427334_s_at | 2810474O19Rik | RIKEN cDNA 2810474O19 gene                                      | 2.549 | 0.0014909 |
| 1452477_at   | 3110057O12Rik | RIKEN cDNA 3110057O12 gene                                      | 2.549 | 0.0004061 |
| 1460579_at   | Dnpep         | aspartyl aminopeptidase                                         | 2.552 | 0.0003738 |
| 1420899_at   | Rab18         | RAB18, member RAS oncogene family                               | 2.553 | 0.000938  |
| 1449862_a_at | Pi4k2b        | phosphatidylinositol 4-kinase type 2 beta                       | 2.555 | 0.0003863 |
| 1427032_at   | Herc4         | hect domain and RLD 4                                           | 2.559 | 0.000589  |
| 1443115_at   | NA            | NA                                                              | 2.562 | 0.0075331 |
| 1421879_at   | Mtmr1         | myotubularin related protein 1                                  | 2.563 | 0.0042826 |
| 1457216_at   | NA            | NA                                                              | 2.564 | 0.0013974 |
| 1440443_at   | E030016H06Rik | RIKEN cDNA E030016H06 gene                                      | 2.564 | 0.0018583 |
| 1453144_at   | 4933439C20Rik | RIKEN cDNA 4933439C20 gene                                      | 2.565 | 0.0014102 |
| 1418392_a_at | Gbp3          | guanylate binding protein 3                                     | 2.565 | 0.0033352 |
| 1431133_at   | Arhgap18      | Rho GTPase activating protein 18                                | 2.565 | 0.0003834 |
| 1423411_at   | Rbm47         | RNA binding motif protein 47                                    | 2.565 | 0.0024534 |

|              |               |                                                        |       |           |
|--------------|---------------|--------------------------------------------------------|-------|-----------|
| 1418722_at   | Ngp           | neutrophilic granule protein                           | 2.566 | 0.0067863 |
| 1421073_a_at | Ptger4        | prostaglandin E receptor 4 (subtype EP4)               | 2.567 | 0.0003851 |
| 1436168_at   | C730029A08Rik | RIKEN cDNA C730029A08 gene                             | 2.570 | 0.000515  |
| 1454070_a_at | Ddhd1         | DDHD domain containing 1                               | 2.573 | 0.000291  |
| 1429336_at   | Tmem87b       | transmembrane protein 87B                              | 2.576 | 0.0004187 |
| 1420517_at   | Chmp4c        | chromatin modifying protein 4C                         | 2.578 | 0.0005688 |
| 1445552_at   | NA            | NA                                                     | 2.579 | 0.0002705 |
| 1443894_at   | Evi2a         | ecotropic viral integration site 2a                    | 2.582 | 0.0007678 |
| 1430172_a_at | Cyp4f16       | cytochrome P450, family 4, subfamily f, polypeptide 16 | 2.584 | 0.0003977 |
| 1439259_x_at | Abhd4         | abhydrolase domain containing 4                        | 2.586 | 0.0008824 |
| 1448548_at   | Tulp4         | tubby like protein 4                                   | 2.586 | 0.0002566 |
| 1444479_at   | NA            | NA                                                     | 2.586 | 0.0002493 |
| 1440749_at   | NA            | NA                                                     | 2.588 | 0.0003813 |
| 1430999_a_at | Scoc          | short coiled-coil protein                              | 2.588 | 0.0037829 |
| 1426892_at   | Utrn          | utrophin                                               | 2.588 | 0.0031119 |
| 1418881_at   | Necab2        | N-terminal EF-hand calcium binding protein 2           | 2.591 | 0.0024735 |
| 1458308_at   | Sbno2         | strawberry notch homolog 2 (Drosophila)                | 2.595 | 0.0003474 |
| 1416804_at   | Ehbp111       | EH domain binding protein 1 like 1                     | 2.595 | 0.002494  |
| 1452563_a_at | Jarid1d       | jumonji, AT rich interactive domain 1D (Rbp2 like)     | 2.595 | 0.001838  |
| 1429173_at   | Dnase111      | deoxyribonuclease 1-like 1                             | 2.597 | 0.001611  |



|              |               |                                                                 |       |           |
|--------------|---------------|-----------------------------------------------------------------|-------|-----------|
| 1439107_a_at | Mll5          | myeloid/lymphoid or mixed-lineage leukemia 5                    | 2.598 | 0.0002942 |
| 1436329_at   | Egr3          | early growth response 3                                         | 2.602 | 0.0047159 |
| 1434302_at   | Raph1         | Ras association (RalGDS/AF-6) and pleckstrin homology domains 1 | 2.602 | 0.0002141 |
| 1427689_a_at | Tnip1         | TNFAIP3 interacting protein 1                                   | 2.603 | 0.0009212 |
| 1423995_at   | Kif1b         | kinesin family member 1B                                        | 2.606 | 0.0006653 |
| 1419372_at   | Gosr2         | golgi SNAP receptor complex member 2                            | 2.610 | 0.0036619 |
| 1424850_at   | Map3k1        | mitogen-activated protein kinase kinase kinase 1                | 2.611 | 0.0001609 |
| 1447774_x_at | 5730469M10Rik | RIKEN cDNA 5730469M10 gene                                      | 2.612 | 0.0020316 |
| 1429784_at   | Mapk1ip1l     | mitogen-activated protein kinase 1 interacting protein 1-like   | 2.613 | 0.0003837 |
| 1426098_a_at | Cast          | calpastatin                                                     | 2.613 | 0.0003451 |
| 1418754_at   | Adcy8         | adenylate cyclase 8                                             | 2.615 | 0.0057368 |
| 1444875_at   | NA            | NA                                                              | 2.616 | 0.0057466 |
| 1452431_s_at | H2-Aa         | histocompatibility 2, class II antigen A, alpha                 | 2.617 | 0.0049268 |
| 1430672_at   | 5033418A18Rik | RIKEN cDNA 5033418A18 gene                                      | 2.618 | 0.0002192 |
| 1448798_at   | Eps8l3        | ESP8-like 3                                                     | 2.620 | 0.0008499 |
| 1428574_a_at | Chn2          | chimerin (chimaerin) 2                                          | 2.622 | 0.0007635 |
| 1436994_a_at | Hist1h1c      | histone cluster 1, H1c                                          | 2.624 | 0.0012681 |
| 1428242_at   | Hmha1         | histocompatibility (minor) HA-1                                 | 2.625 | 0.0083046 |

|              |          |                                                                                                |       |           |
|--------------|----------|------------------------------------------------------------------------------------------------|-------|-----------|
| 1422876_at   | Capn9    | calpain 9                                                                                      | 2.626 | 0.0022373 |
| 1426541_a_at | Endod1   | endonuclease domain containing 1                                                               | 2.627 | 0.0007035 |
| 1417632_at   | Atp6v0a1 | ATPase, H+ transporting, lysosomal V0 subunit A1                                               | 2.627 | 0.010979  |
| 1425634_a_at | Tnk1     | tyrosine kinase, non-receptor, 1                                                               | 2.629 | 0.0001502 |
| 1436897_at   | Mfhas1   | malignant fibrous histiocytoma amplified sequence 1                                            | 2.630 | 0.0006725 |
| 1442295_at   | Arpc2    | actin related protein 2/3 complex, subunit 2                                                   | 2.633 | 0.0001944 |
| 1455056_at   | Lmo7     | LIM domain only 7                                                                              | 2.634 | 0.0004005 |
| 1454149_a_at | Ccnl2    | cyclin L2                                                                                      | 2.635 | 0.0005211 |
| 1426458_at   | Slmap    | sarcolemma associated protein                                                                  | 2.638 | 0.0013249 |
| 1460342_s_at | Mrip     | myosin phosphatase Rho interacting protein                                                     | 2.639 | 0.0002286 |
| 1424552_at   | Casp8    | caspase 8                                                                                      | 2.640 | 0.0004442 |
| 1443867_at   | Ankrd12  | ankyrin repeat domain 12                                                                       | 2.641 | 0.0023412 |
| 1453622_s_at | Mllt3    | myeloid/lymphoid or mixed-lineage leukemia (trithorax homolog, Drosophila); translocated to, 3 | 2.642 | 0.0002635 |
| 1424453_at   | Pcyt1a   | phosphate cytidyltransferase 1, choline, alpha isoform                                         | 2.643 | 0.0009207 |
| 1455996_x_at | Prap1    | proline-rich acidic protein 1                                                                  | 2.643 | 0.0005313 |
| 1460420_a_at | Egfr     | epidermal growth factor receptor                                                               | 2.645 | 0.0002477 |

|              |               |                                                              |       |           |
|--------------|---------------|--------------------------------------------------------------|-------|-----------|
| 1421604_a_at | Klf3          | Kruppel-like factor 3 (basic)                                | 2.647 | 0.0001989 |
| 1441835_x_at | Mtmr11        | myotubularin related protein 11                              | 2.647 | 0.0002203 |
| 1451253_at   | Pxk           | PX domain containing serine/threonine kinase                 | 2.649 | 0.0003732 |
| 1455037_at   | Plxna2        | plexin A2                                                    | 2.650 | 0.002228  |
| 1456133_x_at | Itgb5         | integrin beta 5                                              | 2.653 | 0.0008637 |
| 1460126_at   | NA            | NA                                                           | 2.656 | 0.0012245 |
| 1425226_x_at | Tcrb-J        | T-cell receptor beta, joining region                         | 2.657 | 0.0013767 |
| 1442925_at   | 2610207105Rik | RIKEN cDNA 2610207105 gene                                   | 2.658 | 0.0009317 |
| 1424805_a_at | Tmem214       | transmembrane protein 214                                    | 2.664 | 0.0014265 |
| 1452885_at   | Sfrs2ip       | splicing factor, arginine/serine-rich 2, interacting protein | 2.664 | 0.0140762 |
| 1425822_a_at | Dtx1          | deltex 1 homolog (Drosophila)                                | 2.665 | 0.0038783 |
| 1423403_at   | Mapkbp1       | mitogen-activated protein kinase binding protein 1           | 2.667 | 0.0010562 |
| 1431120_a_at | Golga1        | golgi autoantigen, golgin subfamily a, 1                     | 2.668 | 0.000203  |
| 1444100_at   | NA            | NA                                                           | 2.669 | 0.0006658 |
| 1438118_x_at | Vim           | vimentin                                                     | 2.669 | 0.0007977 |
| 1459667_at   | Arhgap17      | Rho GTPase activating protein 17                             | 2.669 | 0.0001379 |
| 1434393_at   | Usp34         | ubiquitin specific peptidase 34                              | 2.669 | 0.0031578 |
| 1436710_at   | Zswim4        | zinc finger, SWIM domain containing 4                        | 2.670 | 0.0052814 |
| 1431630_a_at | Klf3          | Kruppel-like factor 3 (basic)                                | 2.672 | 0.0002825 |

|              |               |                                                                        |       |           |
|--------------|---------------|------------------------------------------------------------------------|-------|-----------|
| 1451485_at   | 3300001P08Rik | RIKEN cDNA<br>3300001P08<br>gene                                       | 2.672 | 0.0021822 |
| 1451530_at   | Egfr          | epidermal<br>growth factor<br>receptor                                 | 2.674 | 0.0003208 |
| 1442554_s_at | Kalrn         | kalirin, RhoGEF<br>kinase                                              | 2.675 | 0.0114661 |
| 1416424_at   | M6prbp1       | mannose-6-<br>phosphate<br>receptor binding<br>protein 1               | 2.680 | 0.0002508 |
| 1422823_at   | Eps8          | epidermal<br>growth factor<br>receptor<br>pathway<br>substrate 8       | 2.681 | 0.0004729 |
| 1422090_a_at | Pfkfb2        | 6-phosphofructo-<br>2-<br>kinase/fructose-<br>2,6-<br>biphosphatase 2  | 2.682 | 0.0042217 |
| 1424724_a_at | D16Erd472e    | DNA segment,<br>Chr 16, ERATO<br>Doi 472,<br>expressed                 | 2.683 | 0.0044688 |
| 1455865_at   | Insm1         | insulinoma-<br>associated 1                                            | 2.683 | 0.0021058 |
| 1436902_x_at | Tmsb10        | thymosin, beta<br>10                                                   | 2.685 | 0.0004693 |
| 1421987_at   | Papss2        | 3-adenosine-5-<br>phosphoadenosi-<br>ne 5-phosphosulfate<br>synthase 2 | 2.686 | 0.000734  |
| 1435066_at   | Pitpnc1       | phosphatidylinos-<br>itol transfer<br>protein,<br>cytoplasmic 1        | 2.686 | 0.0003327 |
| 1441924_x_at | Edn3          | endothelin 3                                                           | 2.688 | 0.0002964 |
| 1416488_at   | Ccng2         | cyclin G2                                                              | 2.688 | 0.0019314 |
| 1453740_a_at | Ccnl2         | cyclin L2                                                              | 2.688 | 0.0002184 |
| 1440984_at   | Baz2b         | bromodomain<br>adjacent to zinc<br>finger domain,<br>2B                | 2.688 | 0.0001864 |
| 1438556_a_at | Tmod3         | tropomodulin 3                                                         | 2.690 | 0.0026325 |

|              |               |                                                                 |       |           |
|--------------|---------------|-----------------------------------------------------------------|-------|-----------|
| 1420493_a_at | Pcyt2         | phosphate cytidyltransferase 2, ethanolamine                    | 2.692 | 0.0012949 |
| 1440461_at   | NA            | NA                                                              | 2.694 | 0.000268  |
| 1449043_at   | Naga          | N-acetyl galactosaminidase, alpha                               | 2.697 | 0.0005576 |
| 1428045_a_at | Elf2          | E74-like factor 2                                               | 2.698 | 0.0001786 |
| 1441823_at   | Zmiz1         | zinc finger, MIZ-type containing 1                              | 2.699 | 0.0001986 |
| 1418313_at   | Zfp276        | zinc finger protein (C2H2 type) 276                             | 2.699 | 0.0019528 |
| 1416130_at   | Prnp          | prion protein                                                   | 2.700 | 0.0008383 |
| 1434303_at   | Raph1         | Ras association (RalGDS/AF-6) and pleckstrin homology domains 1 | 2.707 | 0.0002851 |
| 1448021_at   | NA            | NA                                                              | 2.708 | 0.0040556 |
| 1424530_at   | Sec14l2       | SEC14-like 2 (S. cerevisiae)                                    | 2.709 | 0.0010813 |
| 1452161_at   | Tiparp        | TCDD-inducible poly(ADP-ribose) polymerase                      | 2.711 | 0.0013213 |
| 1439038_at   | 9130227C08Rik | RIKEN cDNA 9130227C08Rik gene                                   | 2.711 | 0.0002857 |
| 1448132_at   | Slc19a1       | solute carrier family 19 (sodium/hydrogen exchanger), member 1  | 2.712 | 0.0005756 |
| 1418826_at   | Ms4a6b        | membrane-spanning 4-domains, subfamily A, member 6B             | 2.713 | 0.0008463 |
| 1416230_at   | Rfk           | riboflavin kinase                                               | 2.717 | 0.0003675 |
| 1434380_at   | Gbp6          | guanylate binding protein 6                                     | 2.717 | 0.0003295 |

|              |               |                                                                              |       |           |
|--------------|---------------|------------------------------------------------------------------------------|-------|-----------|
| 1428466_at   | Chd3          | chromodomain<br>helicase DNA<br>binding protein 3                            | 2.719 | 0.0016882 |
| 1436337_at   | 4930420K17Rik | RIKEN cDNA<br>4930420K17<br>gene                                             | 2.722 | 0.0008394 |
| 1427932_s_at | 1200016E24Rik | RIKEN cDNA<br>1200016E24<br>gene                                             | 2.722 | 0.000262  |
| 1449847_a_at | Col4a3bp      | collagen, type<br>IV, alpha 3<br>(Goodpasture<br>antigen) binding<br>protein | 2.723 | 0.0001897 |
| 1436936_s_at | Tsix          | X (inactive)-<br>specific<br>transcript,<br>antisense                        | 2.730 | 0.0043091 |
| 1417300_at   | Smpdl3b       | sphingomyelin<br>phosphodiesterase,<br>acid-like 3B                          | 2.731 | 0.0002442 |
| 1455067_at   | Psd4          | pleckstrin and<br>Sec7 domain<br>containing 4                                | 2.732 | 0.001923  |
| 1448648_at   | 9130005N14Rik | RIKEN cDNA<br>9130005N14<br>gene                                             | 2.732 | 0.0007062 |
| 1428881_at   | Klc1          | kinesin light<br>chain 1                                                     | 2.734 | 0.0001159 |
| 1456981_at   | Tmc7          | transmembrane<br>channel-like<br>gene family 7                               | 2.735 | 0.0011642 |
| 1425733_a_at | Eps8          | epidermal<br>growth factor<br>receptor<br>pathway<br>substrate 8             | 2.736 | 0.0002185 |
| 1427980_at   | 4933407C03Rik | RIKEN cDNA<br>4933407C03<br>gene                                             | 2.736 | 0.0004055 |
| 1418296_at   | Fxyd5         | FXYD domain-<br>containing ion<br>transport<br>regulator 5                   | 2.737 | 0.0009917 |
| 1424398_at   | Dhx36         | DEAH (Asp-Glu-<br>Ala-His) box<br>polypeptide 36                             | 2.739 | 0.0023037 |
| 1433477_at   | Abr           | active BCR-<br>related gene                                                  | 2.741 | 0.0006225 |

|              |               |                                                                                                 |       |           |
|--------------|---------------|-------------------------------------------------------------------------------------------------|-------|-----------|
| 1422703_at   | Gyk           | glycerol kinase                                                                                 | 2.741 | 0.0007692 |
| 1427978_at   | 4732418C07Rik | RIKEN cDNA<br>4732418C07<br>gene                                                                | 2.741 | 0.0008312 |
| 1425747_at   | Dock5         | dedicator of<br>cytokinesis 5                                                                   | 2.741 | 0.0006842 |
| 1423201_at   | Ncor1         | nuclear receptor<br>co-repressor 1                                                              | 2.745 | 0.0016221 |
| 1450007_at   | 1500003O03Rik | RIKEN cDNA<br>1500003O03<br>gene                                                                | 2.746 | 9.75E-05  |
| 1437938_x_at | Dnm2          | dynamamin 2                                                                                     | 2.746 | 0.0014558 |
| 1434295_at   | Rasgrp1       | RAS guanyl<br>releasing protein<br>1                                                            | 2.748 | 0.0015    |
| 1452214_at   | Skil          | SKI-like                                                                                        | 2.749 | 0.0002278 |
| 1439656_at   | Pafah1b1      | platelet-<br>activating factor<br>acetylhydrolase,<br>isoform 1b,<br>beta1 subunit              | 2.750 | 0.0001078 |
| 1429009_at   | Snrp70        | U1 small<br>nuclear<br>ribonucleoprotei<br>n polypeptide A                                      | 2.750 | 0.0006434 |
| 1439599_at   | Gal3st2       | galactose-3-O-<br>sulfotransferase<br>2                                                         | 2.751 | 0.0005011 |
| 1452348_s_at | lfi205        | interferon<br>activated gene<br>205                                                             | 2.754 | 0.0041207 |
| 1423875_at   | AI450540      | expressed<br>sequence<br>AI450540                                                               | 2.756 | 0.0001436 |
| 1425073_at   | Plekhg6       | pleckstrin<br>homology<br>domain<br>containing,<br>family G (with<br>RhoGef domain)<br>member 6 | 2.760 | 0.0008959 |
| 1428471_at   | Sorbs1        | sorbin and SH3<br>domain<br>containing 1                                                        | 2.760 | 0.0001333 |
| 1431077_at   | Alpi          | alkaline<br>phosphatase,<br>intestinal                                                          | 2.761 | 0.0001607 |
| 1441756_at   | NA            | NA                                                                                              | 2.762 | 0.0011702 |

|              |               |                                                                     |       |           |
|--------------|---------------|---------------------------------------------------------------------|-------|-----------|
| 1451383_a_at | Chuk          | conserved helix-loop-helix ubiquitous kinase                        | 2.762 | 0.0003857 |
| 1433842_at   | Lrrfip1       | leucine rich repeat (in FLII) interacting protein 1                 | 2.763 | 0.0002978 |
| 1456489_at   | Pcf11         | cleavage and polyadenylation factor subunit homolog (S. cerevisiae) | 2.764 | 0.000174  |
| 1418562_at   | Sf3b1         | splicing factor 3b, subunit 1                                       | 2.765 | 0.0003952 |
| 1418181_at   | Ptp4a3        | protein tyrosine phosphatase 4a3                                    | 2.767 | 0.0043873 |
| 1435857_s_at | Aplp1         | amyloid beta (A4) precursor-like protein 1                          | 2.770 | 0.0020273 |
| 1451275_at   | Uhrf1bp1l     | UHRF1 (ICBP90) binding protein 1 like                               | 2.770 | 0.0001347 |
| 1458210_at   | 9130404H23Rik | RIKEN cDNA 9130404H23 gene                                          | 2.772 | 0.0004452 |
| 1434059_at   | B230312A22Rik | RIKEN cDNA B230312A22 gene                                          | 2.772 | 0.00023   |
| 1416842_at   | Gstm5         | glutathione S-transferase, mu 5                                     | 2.772 | 9.74E-05  |
| 1448352_at   | Luzp1         | leucine zipper protein 1                                            | 2.772 | 0.0044153 |
| 1417388_at   | Bex2          | brain expressed X-linked 2                                          | 2.772 | 0.0013986 |
| 1418348_a_at | Ascc2         | activating signal cointegrator 1 complex subunit 2                  | 2.776 | 0.0001536 |
| 1425787_a_at | Sytl3         | synaptotagmin-like 3                                                | 2.776 | 0.0001547 |
| 1459525_at   | NA            | NA                                                                  | 2.776 | 0.0001926 |
| 1433770_at   | Dpysl2        | dihydropyrimidinase-like 2                                          | 2.777 | 0.000103  |
| 1421275_s_at | Socs4         | suppressor of cytokine signaling 4                                  | 2.779 | 0.0007966 |



|              |         |                                                                  |       |           |
|--------------|---------|------------------------------------------------------------------|-------|-----------|
| 1431197_at   | Arl6ip2 | ADP-ribosylation factor-like 6 interacting protein 2             | 2.780 | 0.0007749 |
| 1427509_at   | Baiap3  | BAI1-associated protein 3                                        | 2.781 | 0.0028547 |
| 1436858_at   | Mbnl2   | muscleblind-like 2                                               | 2.783 | 0.0001478 |
| 1447788_s_at | Tspyl3  | TSPY-like 3                                                      | 2.784 | 0.0015015 |
| 1455162_at   | Ttc39a  | tetratricopeptide repeat domain 39A                              | 2.786 | 0.0007813 |
| 1416229_at   | Rfk     | riboflavin kinase                                                | 2.790 | 0.0002045 |
| 1457608_at   | NA      | NA                                                               | 2.791 | 9.61E-05  |
| 1428729_at   | Krit1   | KRIT1, ankyrin repeat containing                                 | 2.791 | 0.0002591 |
| 1451502_at   | Pla2g10 | phospholipase A2, group X                                        | 2.792 | 0.001287  |
| 1460380_at   | Dsg2    | desmoglein 2                                                     | 2.793 | 0.0007767 |
| 1452070_at   | Dedd2   | death effector domain-containing DNA binding protein 2           | 2.795 | 0.001551  |
| 1426928_at   | Ccdc93  | coiled-coil domain containing 93                                 | 2.798 | 0.002255  |
| 1424876_s_at | Spg20   | spastic paraplegia 20, spartin (Troyer syndrome) homolog (human) | 2.800 | 9.22E-05  |
| 1438011_at   | Pcyt1a  | phosphate cytidylyltransferase 1, choline, alpha isoform         | 2.800 | 0.0003571 |
| 1427885_at   | Pold4   | polymerase (DNA-directed), delta 4                               | 2.800 | 0.0001855 |
| 1427184_at   | Tcrb-J  | T-cell receptor beta, joining region                             | 2.804 | 0.0035139 |
| 1449968_s_at | Acot10  | acyl-CoA thioesterase 10                                         | 2.805 | 0.0006906 |

|              |               |                                                |       |           |
|--------------|---------------|------------------------------------------------|-------|-----------|
| 1430579_at   | Tnik          | TRAF2 and NCK interacting kinase               | 2.806 | 0.0002307 |
| 1450987_a_at | 2310004I24Rik | RIKEN cDNA 2310004I24 gene                     | 2.807 | 0.0004883 |
| 1450170_x_at | H2-D1         | histocompatibility 2, D region locus 1         | 2.808 | 0.0033022 |
| 1434089_at   | Synpo         | synaptopodin                                   | 2.810 | 0.0020629 |
| 1423141_at   | Lipa          | lysosomal acid lipase A                        | 2.810 | 0.0006736 |
| 1451916_s_at | Trim15        | tripartite motif-containing 15                 | 2.810 | 0.0013223 |
| 1440351_at   | NA            | NA                                             | 2.812 | 0.0018669 |
| 1447830_s_at | Rgs2          | regulator of G-protein signaling 2             | 2.822 | 0.0019645 |
| 1425854_x_at | Tcrb-J        | T-cell receptor beta, joining region           | 2.826 | 0.0022878 |
| 1420411_a_at | Pi4k2b        | phosphatidylinositol 4-kinase type 2 beta      | 2.828 | 0.0009041 |
| 1427407_s_at | Trip11        | thyroid hormone receptor interactor 11         | 2.829 | 0.000274  |
| 1452466_a_at | Rbm6          | RNA binding motif protein 6                    | 2.833 | 0.000175  |
| 1436905_x_at | Laptm5        | lysosomal-associated protein transmembrane 5   | 2.834 | 0.0017771 |
| 1444017_at   | NA            | NA                                             | 2.835 | 0.00066   |
| 1428312_at   | Lrrc57        | leucine rich repeat containing 57              | 2.835 | 0.000154  |
| 1431804_a_at | Sp3           | trans-acting transcription factor 3            | 2.837 | 0.0044999 |
| 1455899_x_at | Socs3         | suppressor of cytokine signaling 3             | 2.837 | 0.0011456 |
| 1448007_at   | Baz2b         | bromodomain adjacent to zinc finger domain, 2B | 2.838 | 0.0009659 |
| 1424217_at   | Papola        | poly (A) polymerase alpha                      | 2.839 | 0.0004522 |

|              |               |                                                                          |       |           |
|--------------|---------------|--------------------------------------------------------------------------|-------|-----------|
| 1422735_at   | Foxq1         | forkhead box Q1                                                          | 2.840 | 0.0003333 |
| 1423597_at   | Atp8a1        | ATPase, aminophospholipid transporter (APLT), class I, type 8A, member 1 | 2.841 | 0.0020181 |
| 1434894_at   | Zc3h13        | zinc finger CCCH type containing 13                                      | 2.841 | 8.89E-05  |
| 1418018_at   | Cpd           | carboxypeptidase D                                                       | 2.842 | 0.0058498 |
| 1425921_a_at | 1810055G02Rik | RIKEN cDNA 1810055G02 gene                                               | 2.842 | 0.0004683 |
| 1447421_at   | NA            | NA                                                                       | 2.845 | 0.0002987 |
| 1435679_at   | Optn          | optineurin                                                               | 2.846 | 0.0003218 |
| 1436890_at   | Uap1l1        | UDP-N-acetylglucosamine pyrophosphorylase 1-like 1                       | 2.846 | 0.0011    |
| 1422968_at   | Ihpk1         | inositol hexaphosphate kinase 1                                          | 2.848 | 0.0004999 |
| 1442453_at   | Fcho2         | FCH domain only 2                                                        | 2.852 | 0.0003337 |
| 1428463_a_at | Ppp2r5e       | protein phosphatase 2, regulatory subunit B (B56), epsilon isoform       | 2.854 | 0.000656  |
| 1436983_at   | Crebbp        | CREB binding protein                                                     | 2.855 | 0.0008276 |
| 1422123_s_at | Ceacam1       | carcinoembryonic antigen-related cell adhesion molecule 1                | 2.857 | 0.0018805 |
| 1451486_at   | Slc46a3       | solute carrier family 46, member 3                                       | 2.858 | 0.000892  |
| 1427646_a_at | Arhgef2       | rho/rac guanine nucleotide exchange factor (GEF) 2                       | 2.860 | 0.0003371 |
| 1417820_at   | Tor1b         | torsin family 1, member B                                                | 2.863 | 0.0001831 |
| 1427007_at   | Sash3         | SAM and SH3 domain containing 3                                          | 2.863 | 0.0027802 |

|              |               |                                                                                 |       |           |
|--------------|---------------|---------------------------------------------------------------------------------|-------|-----------|
| 1429006_s_at | 2610110G12Rik | RIKEN cDNA<br>2610110G12<br>gene                                                | 2.865 | 0.0007151 |
| 1456888_at   | Pfkfb4        | 6-phosphofructo-<br>2-<br>kinase/fructose-<br>2,6-<br>biphosphatase 4           | 2.867 | 0.0002428 |
| 1457348_at   | NA            | NA                                                                              | 2.867 | 0.0001754 |
| 1428119_a_at | Rap2c         | RAP2C,<br>member of RAS<br>oncogene family                                      | 2.868 | 0.0003074 |
| 1417292_at   | lfi47         | interferon<br>gamma<br>inducible protein<br>47                                  | 2.868 | 0.0004182 |
| 1426225_at   | Rbp4          | retinol binding<br>protein 4,<br>plasma                                         | 2.871 | 0.0012584 |
| 1438673_at   | Slc4a7        | solute carrier<br>family 4, sodium<br>bicarbonate<br>cotransporter,<br>member 7 | 2.873 | 0.0010856 |
| 1430680_a_at | 5830417110Rik | RIKEN cDNA<br>5830417110<br>gene                                                | 2.881 | 0.0018749 |
| 1445239_at   | Gatad2a       | GATA zinc<br>finger domain<br>containing 2A                                     | 2.882 | 7.84E-05  |
| 1421489_a_at | 2010106E10Rik | RIKEN cDNA<br>2010106E10<br>gene                                                | 2.883 | 0.0001821 |
| 1449311_at   | Bach1         | BTB and CNC<br>homology 1                                                       | 2.884 | 0.0001191 |
| 1418643_at   | Tspan13       | tetraspanin 13                                                                  | 2.887 | 0.0001722 |
| 1426595_at   | Slc18a1       | solute carrier<br>family 18<br>(vesicular<br>monoamine),<br>member 1            | 2.888 | 0.0002019 |
| 1426972_at   | Sec24d        | Sec24 related<br>gene family,<br>member D (S.<br>cerevisiae)                    | 2.889 | 0.0002126 |
| 1459906_at   | NA            | NA                                                                              | 2.891 | 0.0002149 |
| 1448233_at   | Prnp          | prion protein                                                                   | 2.895 | 8.28E-05  |

|              |          |                                                                      |       |           |
|--------------|----------|----------------------------------------------------------------------|-------|-----------|
| 1455735_at   | Ap1s3    | adaptor-related protein complex AP-1, sigma 3                        | 2.897 | 0.0006364 |
| 1426831_at   | Ahcy1    | S-adenosylhomocysteine hydrolase-like 1                              | 2.898 | 0.0003156 |
| 1459565_at   | Uty      | ubiquitously transcribed tetratricopeptide repeat gene, Y chromosome | 2.899 | 0.0005426 |
| 1437813_at   | Aim1l    | absent in melanoma 1-like                                            | 2.901 | 6.22E-05  |
| 1448160_at   | Lcp1     | lymphocyte cytosolic protein 1                                       | 2.902 | 0.0004956 |
| 1416437_a_at | Mapk8ip3 | mitogen-activated protein kinase 8 interacting protein 3             | 2.904 | 0.00376   |
| 1452231_x_at | Ifi205   | interferon activated gene 205                                        | 2.905 | 0.0011715 |
| 1430996_at   | Etnk1    | ethanolamine kinase 1                                                | 2.906 | 0.0001212 |
| 1428484_at   | Osbpl3   | oxysterol binding protein-like 3                                     | 2.907 | 0.0004068 |
| 1425584_x_at | NA       | NA                                                                   | 2.907 | 0.000453  |
| 1438549_a_at | Srr      | serine racemase                                                      | 2.908 | 0.0004273 |
| 1437252_at   | Gats     | opposite strand transcription unit to Stag3                          | 2.912 | 0.0009158 |
| 1421957_a_at | Pcyt1a   | phosphate cytidyltransferase 1, choline, alpha isoform               | 2.913 | 0.0002882 |
| 1460419_a_at | Prkcb    | protein kinase C, beta                                               | 2.916 | 0.0009282 |
| 1451714_a_at | Map2k3   | mitogen-activated protein kinase kinase 3                            | 2.918 | 9.03E-05  |
| 1418884_x_at | Tuba1a   | tubulin, alpha 1A                                                    | 2.919 | 0.0002148 |

|              |               |                                                          |       |           |
|--------------|---------------|----------------------------------------------------------|-------|-----------|
| 1418758_a_at | Cyth3         | cytohesin 3                                              | 2.919 | 0.0020272 |
| 1451680_at   | Srxn1         | sulfiredoxin 1 homolog (S. cerevisiae)                   | 2.922 | 0.0003459 |
| 1452428_a_at | B2m           | beta-2 microglobulin                                     | 2.923 | 0.0003217 |
| 1434300_at   | 2610101N10Rik | RIKEN cDNA 2610101N10 gene                               | 2.923 | 0.0007582 |
| 1434140_at   | Mcf2l         | mcf.2 transforming sequence-like                         | 2.927 | 0.0001328 |
| 1453015_at   | 5830471E12Rik | RIKEN cDNA 5830471E12 gene                               | 2.927 | 0.000592  |
| 1448485_at   | Ggt1          | gamma-glutamyltransferase 1                              | 2.929 | 0.0017652 |
| 1452193_a_at | Wasl          | Wiskott-Aldrich syndrome-like (human)                    | 2.931 | 0.000534  |
| 1451821_a_at | Sp100         | nuclear antigen Sp100                                    | 2.932 | 0.0004365 |
| 1419631_at   | Was           | Wiskott-Aldrich syndrome homolog (human)                 | 2.940 | 0.0008224 |
| 1460650_at   | Atp6v0a1      | ATPase, H+ transporting, lysosomal V0 subunit A1         | 2.941 | 0.0007495 |
| 1453185_at   | Sfrs18        | splicing factor, arginine/serine-rich 18                 | 2.941 | 0.0027026 |
| 1449430_a_at | Treh          | trehalase (brush-border membrane glycoprotein)           | 2.945 | 0.0030238 |
| 1426628_at   | Tmem184c      | transmembrane protein 184C                               | 2.946 | 0.0002789 |
| 1437249_at   | Skap1         | src family associated phosphoprotein 1                   | 2.947 | 0.0006156 |
| 1440218_at   | Pcdh24        | protocadherin 24                                         | 2.948 | 0.000807  |
| 1434005_at   | Rbms1         | RNA binding motif, single stranded interacting protein 1 | 2.949 | 0.0034075 |

|              |               |                                                                 |       |           |
|--------------|---------------|-----------------------------------------------------------------|-------|-----------|
| 1421043_s_at | Arhgef2       | rho/rac guanine nucleotide exchange factor (GEF) 2              | 2.951 | 0.0003636 |
| 1438074_at   | 2210010C17Rik | RIKEN cDNA 2210010C17 gene                                      | 2.952 | 0.0003754 |
| 1446417_at   | NA            | NA                                                              | 2.954 | 0.0001532 |
| 1448467_a_at | Ehbp111       | EH domain binding protein 1 like 1                              | 2.957 | 0.0002374 |
| 1427329_a_at | Igh-6         | immunoglobulin heavy chain 6 (heavy chain of IgM)               | 2.958 | 0.0016325 |
| 1444574_at   | NA            | NA                                                              | 2.962 | 0.0024743 |
| 1425826_a_at | Sorbs1        | sorbin and SH3 domain containing 1                              | 2.964 | 0.000707  |
| 1418131_at   | Samhd1        | SAM domain and HD domain, 1                                     | 2.970 | 0.0003461 |
| 1440311_at   | Sorbs1        | sorbin and SH3 domain containing 1                              | 2.971 | 0.0010248 |
| 1417877_at   | Eepd1         | endonuclease/exonuclease/phosphatase family domain containing 1 | 2.976 | 0.0001024 |
| 1431704_a_at | Ralgps2       | Ral GEF with PH domain and SH3 binding motif 2                  | 2.977 | 0.0003207 |
| 1444141_at   | Snx13         | sorting nexin 13                                                | 2.977 | 0.0024527 |
| 1449195_s_at | Cxcl16        | chemokine (C-X-C motif) ligand 16                               | 2.978 | 0.0006534 |
| 1423626_at   | Dst           | dystonin                                                        | 2.979 | 0.0008846 |
| 1430494_at   | 2010005J08Rik | RIKEN cDNA 2010005J08 gene                                      | 2.982 | 0.0001563 |
| 1425136_x_at | Dnm2          | dynamins 2                                                      | 2.983 | 0.0006899 |
| 1422174_at   | Pdx1          | pancreatic and duodenal homeobox 1                              | 2.986 | 0.0013296 |
| 1430216_at   | Zfp292        | zinc finger protein 292                                         | 2.987 | 0.0009344 |

|              |               |                                                                            |       |           |
|--------------|---------------|----------------------------------------------------------------------------|-------|-----------|
| 1455269_a_at | Coro1a        | coronin, actin binding protein 1A                                          | 2.989 | 0.0030713 |
| 1447926_at   | Arl5a         | ADP-ribosylation factor-like 5A                                            | 2.992 | 5.08E-05  |
| 1417040_a_at | Bok           | BCL2-related ovarian killer protein                                        | 2.993 | 0.0001131 |
| 1446318_at   | NA            | NA                                                                         | 2.994 | 0.0006526 |
| 1417649_at   | Cdkn1c        | cyclin-dependent kinase inhibitor 1C (P57)                                 | 2.995 | 0.0023618 |
| 1428691_at   | Chd2          | chromodomain helicase DNA binding protein 2                                | 2.995 | 0.0001021 |
| 1428359_s_at | 1810010M01Rik | RIKEN cDNA 1810010M01 gene                                                 | 2.996 | 0.0001785 |
| 1417116_at   | Slc6a8        | solute carrier family 6 (neurotransmitter transporter, creatine), member 8 | 2.996 | 0.0001258 |
| 1440273_at   | NA            | NA                                                                         | 2.998 | 8.81E-05  |
| 1416576_at   | Socs3         | suppressor of cytokine signaling 3                                         | 2.998 | 0.0005826 |
| 1437117_at   | Centb1        | centaurin, beta 1                                                          | 3.000 | 0.00453   |
| 1452228_at   | Tbc1d23       | TBC1 domain family, member 23                                              | 3.001 | 0.0002961 |
| 1439349_at   | Sbno2         | strawberry notch homolog 2 (Drosophila)                                    | 3.002 | 6.44E-05  |
| 1418278_at   | Apoc3         | apolipoprotein C-III                                                       | 3.004 | 0.0005393 |
| 1426940_at   | Sidt2         | SID1 transmembrane family, member 2                                        | 3.005 | 0.0003224 |
| 1452187_at   | Rbm5          | RNA binding motif protein 5                                                | 3.005 | 0.0003066 |



|              |               |                                                                                               |       |           |
|--------------|---------------|-----------------------------------------------------------------------------------------------|-------|-----------|
| 1456609_at   | Camk2n1       | calcium/calmodulin-dependent protein kinase II inhibitor 1                                    | 3.007 | 0.0001649 |
| 1442849_at   | Lrp1          | low density lipoprotein receptor-related protein 1                                            | 3.007 | 0.0012347 |
| 1449904_at   | Dopey2        | dopey family member 2                                                                         | 3.011 | 0.0012494 |
| 1439999_at   | NA            | NA                                                                                            | 3.012 | 0.0041138 |
| 1444660_at   | 4932438A13Rik | RIKEN cDNA 4932438A13 gene                                                                    | 3.012 | 0.000161  |
| 1423086_at   | Npc1          | Niemann Pick type C1                                                                          | 3.012 | 0.0001879 |
| 1434034_at   | Cerk          | ceramide kinase                                                                               | 3.012 | 0.0005022 |
| 1434856_at   | Ankrd44       | ankyrin repeat domain 44                                                                      | 3.016 | 0.0008591 |
| 1447669_s_at | Gng4          | guanine nucleotide binding protein (G protein), gamma 4                                       | 3.017 | 0.0002927 |
| 1439832_at   | NA            | NA                                                                                            | 3.018 | 0.000224  |
| 1424687_at   | Heatr6        | HEAT repeat containing 6                                                                      | 3.020 | 0.0003105 |
| 1425215_at   | Ffar2         | free fatty acid receptor 2                                                                    | 3.027 | 7.63E-05  |
| 1421066_at   | Jak2          | Janus kinase 2                                                                                | 3.027 | 0.0002287 |
| 1438677_at   | Pkp4          | plakophilin 4                                                                                 | 3.027 | 0.0003511 |
| 1424598_at   | Ddx6          | DEAD (Asp-Glu-Ala-Asp) box polypeptide 6                                                      | 3.028 | 0.0002837 |
| 1453393_a_at | Chst4         | carbohydrate (chondroitin 6/keratan) sulfotransferase 4                                       | 3.028 | 5.74E-05  |
| 1436297_a_at | Grina         | glutamate receptor, ionotropic, N-methyl D-aspartate-associated protein 1 (glutamate binding) | 3.031 | 0.0012992 |

|              |               |                                                               |       |           |
|--------------|---------------|---------------------------------------------------------------|-------|-----------|
| 1456772_at   | Ncf1          | neutrophil cytosolic factor 1                                 | 3.032 | 0.002571  |
| 1418252_at   | Padi2         | peptidyl arginine deiminase, type II                          | 3.033 | 0.0009305 |
| 1433801_at   | 9930012K11Rik | RIKEN cDNA 9930012K11 gene                                    | 3.033 | 0.0004916 |
| 1428223_at   | Mfsd2         | major facilitator superfamily domain containing 2             | 3.034 | 4.34E-05  |
| 1434067_at   | AI662270      | expressed sequence AI662270                                   | 3.035 | 0.0048757 |
| 1424941_at   | BC016579      | cDNA sequence, BC016579                                       | 3.036 | 0.0004331 |
| 1451283_at   | 1810073G14Rik | RIKEN cDNA 1810073G14 gene                                    | 3.039 | 8.70E-05  |
| 1455998_at   | LOC667118     | similar to Zinc finger BED domain containing protein 4        | 3.039 | 0.0003582 |
| 1419038_a_at | Csnk2a1       | casein kinase 2, alpha 1 polypeptide                          | 3.040 | 0.0001382 |
| 1426165_a_at | Casp3         | caspase 3                                                     | 3.041 | 0.0001172 |
| 1449175_at   | Gpr65         | G-protein coupled receptor 65                                 | 3.043 | 0.0007884 |
| 1421679_a_at | Cdkn1a        | cyclin-dependent kinase inhibitor 1A (P21)                    | 3.046 | 0.0017993 |
| 1424775_at   | Oas1g         | 2@#%&-5@#%& oligoadenylate synthetase 1G                      | 3.051 | 9.63E-05  |
| 1419388_at   | Tm4sf20       | transmembrane 4 L six family member 20                        | 3.052 | 0.0002897 |
| 1417995_at   | Ptpn22        | protein tyrosine phosphatase, non-receptor type 22 (lymphoid) | 3.054 | 0.0001624 |

|              |          |                                                     |       |           |
|--------------|----------|-----------------------------------------------------|-------|-----------|
| 1435155_at   | Cgn      | cingulin                                            | 3.055 | 8.96E-05  |
| 1454247_a_at | Gpa33    | glycoprotein A33 (transmembrane)                    | 3.057 | 4.43E-05  |
| 1444881_at   | Taok3    | TAO kinase 3                                        | 3.058 | 0.0003414 |
| 1418841_s_at | Cdc21l   | cell division cycle 2-like 1                        | 3.059 | 0.0001404 |
| 1415949_at   | Cpe      | carboxypeptidase E                                  | 3.059 | 7.16E-05  |
| 1423603_at   | Zfpm1    | zinc finger protein, multitype 1                    | 3.062 | 0.0040175 |
| 1424148_a_at | Stap2    | signal transducing adaptor family member 2          | 3.063 | 0.0001642 |
| 1421268_at   | Ugcg     | UDP-glucose ceramide glucosyltransferase            | 3.067 | 0.0001172 |
| 1456839_at   | NA       | NA                                                  | 3.067 | 3.64E-05  |
| 1427742_a_at | Klf6     | Kruppel-like factor 6                               | 3.068 | 0.0001707 |
| 1449453_at   | Bst1     | bone marrow stromal cell antigen 1                  | 3.068 | 0.000611  |
| 1418734_at   | H2-Q1    | histocompatibility 2, Q region locus 1              | 3.068 | 0.0004203 |
| 1419123_a_at | Pdgfc    | platelet-derived growth factor, C polypeptide       | 3.070 | 0.0115253 |
| 1452322_a_at | Brwd1    | bromodomain and WD repeat domain containing 1       | 3.072 | 6.60E-05  |
| 1418835_at   | Phlda1   | pleckstrin homology-like domain, family A, member 1 | 3.072 | 0.0004438 |
| 1448797_at   | Elk3     | ELK3, member of ETS oncogene family                 | 3.074 | 0.0003854 |
| 1417533_a_at | Itgb5    | integrin beta 5                                     | 3.074 | 0.0002363 |
| 1425122_at   | ORF9     | open reading frame 9                                | 3.076 | 5.51E-05  |
| 1457189_at   | NA       | NA                                                  | 3.081 | 8.36E-05  |
| 1421488_at   | Rabgap1l | RAB GTPase activating protein 1-like                | 3.081 | 0.0036982 |

|              |         |                                                |       |           |
|--------------|---------|------------------------------------------------|-------|-----------|
| 1422031_a_at | Zfand6  | zinc finger, AN1-type domain 6                 | 3.083 | 0.0002637 |
| 1444937_at   | NA      | NA                                             | 3.088 | 0.0007096 |
| 1427891_at   | Gimap6  | GTPase, IMAP family member 6                   | 3.089 | 0.0053381 |
| 1445311_at   | Akap13  | A kinase (PRKA) anchor protein 13              | 3.089 | 5.91E-05  |
| 1449248_at   | Clcn2   | chloride channel 2                             | 3.091 | 6.01E-05  |
| 1439501_at   | Cbara1  | calcium binding atopy-related autoantigen 1    | 3.091 | 0.0005869 |
| 1439328_at   | Nfat5   | nuclear factor of activated T-cells 5          | 3.096 | 6.31E-05  |
| 1418578_at   | Dgka    | diacylglycerol kinase, alpha                   | 3.097 | 0.000118  |
| 1419478_at   | Sectm1b | secreted and transmembrane 1B                  | 3.098 | 0.0004274 |
| 1450807_at   | Ltb4r2  | leukotriene B4 receptor 2                      | 3.099 | 0.0011421 |
| 1456292_a_at | Vim     | vimentin                                       | 3.099 | 0.0001459 |
| 1444295_at   | Neo1    | neogenin                                       | 3.105 | 0.0002181 |
| 1416593_at   | Glrx    | glutaredoxin                                   | 3.107 | 0.0004945 |
| 1443877_a_at | Rapgef6 | Rap guanine nucleotide exchange factor (GEF) 6 | 3.110 | 0.0005636 |
| 1421873_s_at | Rab24   | RAB24, member RAS oncogene family              | 3.115 | 4.49E-05  |
| 1418824_at   | Arf6    | ADP-ribosylation factor 6                      | 3.115 | 0.0018634 |
| 1433910_at   | Zcchc6  | zinc finger, CCHC domain containing 6          | 3.115 | 6.31E-05  |
| 1440856_at   | Mapk8   | mitogen-activated protein kinase 8             | 3.118 | 0.0011027 |
| 1450083_at   | Cnot4   | CCR4-NOT transcription complex, subunit 4      | 3.123 | 0.0003273 |

|              |               |                                                                   |       |           |
|--------------|---------------|-------------------------------------------------------------------|-------|-----------|
| 1417244_a_at | Irf7          | interferon regulatory factor 7                                    | 3.124 | 0.0004159 |
| 1451836_at   | BC022651      | cDNA sequence BC022651                                            | 3.125 | 0.000201  |
| 1448499_a_at | Ephx2         | epoxide hydrolase 2, cytoplasmic                                  | 3.125 | 0.0002414 |
| 1455442_at   | Slc6a19       | solute carrier family 6 (neurotransmitter transporter), member 19 | 3.126 | 0.0008631 |
| 1457845_at   | NA            | NA                                                                | 3.128 | 0.0010526 |
| 1449526_a_at | Gdpd3         | glycerophosphodiester phosphodiesterase domain containing 3       | 3.131 | 0.0004492 |
| 1458849_at   | Asah2         | N-acylsphingosine amidohydrolase 2                                | 3.139 | 0.0002321 |
| 1433068_at   | 6330582A15Rik | RIKEN cDNA 6330582A15 gene                                        | 3.140 | 3.25E-05  |
| 1418312_at   | Zfp276        | zinc finger protein (C2H2 type) 276                               | 3.148 | 0.0002004 |
| 1430329_at   | Cgn           | cingulin                                                          | 3.148 | 0.0002432 |
| 1431359_a_at | 1110007C09Rik | RIKEN cDNA 1110007C09 gene                                        | 3.150 | 3.18E-05  |
| 1448301_s_at | Serpinb1a     | serine (or cysteine) peptidase inhibitor, clade B, member 1a      | 3.150 | 9.78E-05  |
| 1449702_at   | Zfand2a       | zinc finger, AN1-type domain 2A                                   | 3.152 | 0.0007227 |
| 1442163_at   | NA            | NA                                                                | 3.158 | 0.0003032 |
| 1459984_at   | Mia3          | melanoma inhibitory activity 3                                    | 3.164 | 0.0001443 |
| 1459159_a_at | Ccdc6         | coiled-coil domain containing 6                                   | 3.167 | 5.21E-05  |

|              |               |                                                               |       |           |
|--------------|---------------|---------------------------------------------------------------|-------|-----------|
| 1442489_at   | D1Erttd564e   | DNA segment,<br>Chr 1, ERATO<br>Doi 564,<br>expressed         | 3.169 | 0.0040426 |
| 1435394_s_at | Rhoc          | ras homolog<br>gene family,<br>member C                       | 3.174 | 0.0002971 |
| 1450093_s_at | Zbtb7a        | zinc finger and<br>BTB domain<br>containing 7a                | 3.179 | 0.0002215 |
| 1429262_at   | Rassf6        | Ras association<br>(RalGDS/AF-6)<br>domain family<br>member 6 | 3.179 | 0.0002819 |
| 1438533_at   | Myo9b         | myosin IXb                                                    | 3.180 | 0.0012445 |
| 1428671_at   | 2200002D01Rik | RIKEN cDNA<br>2200002D01<br>gene                              | 3.181 | 0.0002097 |
| 1415983_at   | Lcp1          | lymphocyte<br>cytosolic protein<br>1                          | 3.183 | 0.0007927 |
| 1455151_at   | Akap9         | A kinase<br>(PRKA) anchor<br>protein (yotiao)<br>9            | 3.185 | 0.0009019 |
| 1428435_at   | Muc2          | mucin 2                                                       | 3.197 | 0.0001175 |
| 1434333_a_at | Prkd2         | protein kinase<br>D2                                          | 3.197 | 0.0010204 |
| 1449822_at   | Atoh1         | atonal homolog<br>1 (Drosophila)                              | 3.201 | 4.91E-05  |
| 1419248_at   | Rgs2          | regulator of G-<br>protein signaling<br>2                     | 3.205 | 0.0002483 |
| 1455161_at   | AI504432      | expressed<br>sequence<br>AI504432                             | 3.212 | 0.0006724 |
| 1451458_at   | Tmem2         | transmembrane<br>protein 2                                    | 3.226 | 5.50E-05  |
| 1438581_at   | Specc1l       | SPECC1-like                                                   | 3.226 | 2.10E-05  |
| 1448297_a_at | Tnk2          | tyrosine kinase,<br>non-receptor, 2                           | 3.229 | 0.0001206 |
| 1442434_at   | D8Erttd82e    | DNA segment,<br>Chr 8, ERATO<br>Doi 82,<br>expressed          | 3.229 | 0.0001982 |
| 1454683_at   | Sfrs8         | splicing factor,<br>arginine/serine-<br>rich 8                | 3.233 | 9.64E-05  |

|              |               |                                                                                          |       |           |
|--------------|---------------|------------------------------------------------------------------------------------------|-------|-----------|
| 1445337_at   | Dnajc13       | DnaJ (Hsp40) homolog, subfamily C, member 13                                             | 3.233 | 7.40E-05  |
| 1444599_at   | Herc4         | hect domain and RLD 4                                                                    | 3.234 | 0.0003369 |
| 1439058_at   | Sfpq          | splicing factor proline/glutamine rich (polypyrimidine tract binding protein associated) | 3.237 | 0.0003633 |
| 1427419_x_at | Ccr9          | chemokine (C-C motif) receptor 9                                                         | 3.240 | 0.0014987 |
| 1446014_at   | NA            | NA                                                                                       | 3.248 | 0.0002988 |
| 1427379_at   | Pnpla6        | patatin-like phospholipase domain containing 6                                           | 3.251 | 0.0002705 |
| 1437633_at   | Ankrd11       | ankyrin repeat domain 11                                                                 | 3.251 | 0.0002779 |
| 1440708_at   | Myh9          | myosin, heavy polypeptide 9, non-muscle                                                  | 3.259 | 0.0003084 |
| 1450403_at   | Stat2         | signal transducer and activator of transcription 2                                       | 3.262 | 2.67E-05  |
| 1449042_at   | Ctcf          | CCCTC-binding factor                                                                     | 3.270 | 0.0005658 |
| 1416383_a_at | Pcx           | pyruvate carboxylase                                                                     | 3.270 | 0.0002154 |
| 1448943_at   | Nrp1          | neuropilin 1                                                                             | 3.271 | 4.92E-05  |
| 1437006_x_at | Becn1         | beclin 1, autophagy related                                                              | 3.271 | 0.0020577 |
| 1450069_a_at | Cugbp2        | CUG triplet repeat, RNA binding protein 2                                                | 3.275 | 0.0009918 |
| 1457253_at   | Trim40        | tripartite motif-containing 40                                                           | 3.276 | 9.27E-05  |
| 1433205_at   | 2810436B12Rik | RIKEN cDNA 2810436B12 gene                                                               | 3.286 | 6.13E-05  |
| 1428330_at   | Dopey2        | dopey family member 2                                                                    | 3.289 | 7.74E-05  |
| 1449071_at   | Myl7          | myosin, light polypeptide 7, regulatory                                                  | 3.293 | 2.43E-05  |

|              |               |                                                                                         |       |           |
|--------------|---------------|-----------------------------------------------------------------------------------------|-------|-----------|
| 1429049_at   | Nuak2         | NUAK family, SNF1-like kinase, 2                                                        | 3.294 | 7.37E-05  |
| 1439770_at   | 6430598A04Rik | RIKEN cDNA 6430598A04 gene                                                              | 3.295 | 3.38E-05  |
| 1452347_at   | Mef2a         | myocyte enhancer factor 2A                                                              | 3.295 | 0.0001516 |
| 1437122_at   | Bcl2          | B-cell leukemia/lymphoma 2                                                              | 3.296 | 0.0003528 |
| 1426743_at   | Appl2         | adaptor protein, phosphotyrosine interaction, PH domain and leucine zipper containing 2 | 3.297 | 3.58E-05  |
| 1423389_at   | Smad7         | MAD homolog 7 (Drosophila)                                                              | 3.299 | 5.07E-05  |
| 1447141_at   | AW107722      | expressed sequence AW107722                                                             | 3.302 | 4.25E-05  |
| 1425470_at   | NA            | NA                                                                                      | 3.305 | 0.0003493 |
| 1456014_s_at | Trpt1         | tRNA phosphotransferase 1                                                               | 3.307 | 0.0003025 |
| 1432282_a_at | Tlcd2         | TLC domain containing 2                                                                 | 3.308 | 9.08E-05  |
| 1423986_a_at | Shisa5        | shisa homolog 5 (Xenopus laevis)                                                        | 3.312 | 5.06E-05  |
| 1449025_at   | Ifit3         | interferon-induced protein with tetratricopeptide repeats 3                             | 3.313 | 5.03E-05  |
| 1434334_at   | Prkd2         | protein kinase D2                                                                       | 3.314 | 0.00043   |
| 1425639_at   | Centa2        | centaurin, alpha 2                                                                      | 3.318 | 0.0055321 |
| 1438152_at   | NA            | NA                                                                                      | 3.318 | 0.001314  |
| 1421064_at   | Mpp5          | membrane protein, palmitoylated 5 (MAGUK p55 subfamily member 5)                        | 3.319 | 4.88E-05  |



|              |          |                                                               |       |           |
|--------------|----------|---------------------------------------------------------------|-------|-----------|
| 1451261_s_at | Stap2    | signal transducing adaptor family member 2                    | 3.324 | 4.38E-05  |
| 1456195_x_at | Itgb5    | integrin beta 5                                               | 3.325 | 0.0001197 |
| 1457213_a_at | Dgkh     | diacylglycerol kinase, eta                                    | 3.327 | 0.0001654 |
| 1458969_at   | AU019559 | expressed sequence AU019559                                   | 3.327 | 6.69E-05  |
| 1456050_at   | C80998   | expressed sequence C80998                                     | 3.331 | 0.0001346 |
| 1451755_a_at | Apobec1  | apolipoprotein B mRNA editing enzyme, catalytic polypeptide 1 | 3.335 | 4.83E-05  |
| 1426799_at   | Rab8b    | RAB8B, member RAS oncogene family                             | 3.337 | 2.44E-05  |
| 1442199_at   | Btnl2    | butyrophilin-like 2                                           | 3.350 | 0.0001007 |
| 1437045_at   | Mapk8    | mitogen-activated protein kinase 8                            | 3.351 | 7.32E-05  |
| 1418536_at   | H2-Q7    | histocompatibility 2, Q region locus 7                        | 3.351 | 0.0003144 |
| 1433748_at   | Zdhhc18  | zinc finger, DHHC domain containing 18                        | 3.354 | 4.53E-05  |
| 1434610_at   | Plec1    | plectin 1                                                     | 3.355 | 0.0010502 |
| 1452836_at   | Lpin2    | lipin 2                                                       | 3.357 | 0.0001466 |
| 1419256_at   | Spnb2    | spectrin beta 2                                               | 3.357 | 0.0002208 |
| 1435748_at   | Gda      | guanine deaminase                                             | 3.358 | 0.0005594 |
| 1426534_a_at | Arfgap3  | ADP-ribosylation factor GTPase activating protein 3           | 3.358 | 2.15E-05  |
| 1427209_at   | Baz2a    | bromodomain adjacent to zinc finger domain, 2A                | 3.362 | 0.0003954 |
| 1427199_at   | Fryl     | furry homolog-like (Drosophila)                               | 3.367 | 5.46E-05  |

|              |          |                                                                     |       |           |
|--------------|----------|---------------------------------------------------------------------|-------|-----------|
| 1456110_at   | Ankrd11  | ankyrin repeat domain 11                                            | 3.376 | 0.0026657 |
| 1419523_at   | Cyp3a13  | cytochrome P450, family 3, subfamily a, polypeptide 13              | 3.376 | 0.0001162 |
| 1457193_at   | Mll3     | myeloid/lymphoid or mixed-lineage leukemia 3                        | 3.389 | 2.21E-05  |
| 1441170_a_at | Dab2ip   | disabled homolog 2 (Drosophila) interacting protein                 | 3.393 | 0.0002006 |
| 1443837_x_at | Bcl2     | B-cell leukemia/lymphoma 2                                          | 3.399 | 0.0002391 |
| 1440091_at   | Meis2    | Meis homeobox 2                                                     | 3.402 | 0.0001154 |
| 1450315_at   | V1rd14   | vomeronasal 1 receptor, D14                                         | 3.404 | 0.0006144 |
| 1457619_at   | BC015286 | cDNA sequence BC015286                                              | 3.407 | 0.0001484 |
| 1452368_at   | Bcr      | breakpoint cluster region                                           | 3.415 | 2.29E-05  |
| 1455876_at   | Slc4a7   | solute carrier family 4, sodium bicarbonate cotransporter, member 7 | 3.422 | 0.0003991 |
| 1436631_at   | Ctnna1   | catenin (cadherin associated protein), alpha 1                      | 3.422 | 8.14E-05  |
| 1425837_a_at | Ccrn4l   | CCR4 carbon catabolite repression 4-like (S. cerevisiae)            | 3.423 | 3.04E-05  |
| 1436737_a_at | Sorbs1   | sorbin and SH3 domain containing 1                                  | 3.424 | 0.000228  |
| 1433465_a_at | AI467606 | expressed sequence AI467606                                         | 3.425 | 1.41E-05  |
| 1456494_a_at | AI451617 | expressed sequence AI451617                                         | 3.434 | 0.0007477 |

|              |               |                                                |       |           |
|--------------|---------------|------------------------------------------------|-------|-----------|
| 1450734_at   | Sec16b        | SEC16 homolog B ( <i>S. cerevisiae</i> )       | 3.450 | 2.73E-05  |
| 1421219_at   | Ttll3         | tubulin tyrosine ligase-like family, member 3  | 3.452 | 0.0003442 |
| 1429778_at   | Optn          | optineurin                                     | 3.452 | 4.24E-05  |
| 1447818_x_at | Rheb1         | Ras homolog enriched in brain like 1           | 3.453 | 0.0009013 |
| 1435959_at   | Arhgap15      | Rho GTPase activating protein 15               | 3.453 | 0.0002143 |
| 1440055_at   | NA            | NA                                             | 3.453 | 4.58E-05  |
| 1417370_at   | Tff3          | trefoil factor 3, intestinal                   | 3.458 | 5.21E-05  |
| 1426715_s_at | Slc46a1       | solute carrier family 46, member 1             | 3.459 | 0.0004245 |
| 1424286_at   | Prkx          | protein kinase, X-linked                       | 3.462 | 3.28E-05  |
| 1451158_at   | Trip12        | thyroid hormone receptor interactor 12         | 3.463 | 1.27E-05  |
| 1425687_at   | Cflar         | CASP8 and FADD-like apoptosis regulator        | 3.478 | 9.44E-05  |
| 1452016_at   | Alox5ap       | arachidonate 5-lipoxygenase activating protein | 3.482 | 3.25E-05  |
| 1457976_at   | 2010002M12Rik | RIKEN cDNA 2010002M12 gene                     | 3.488 | 0.0021962 |
| 1457020_at   | NA            | NA                                             | 3.490 | 8.41E-05  |
| 1450744_at   | Ell2          | elongation factor RNA polymerase II 2          | 3.490 | 0.0001295 |
| 1425576_at   | Ahcy1         | S-adenosylhomocysteine hydrolase-like 1        | 3.491 | 6.52E-05  |
| 1436502_at   | Mtus1         | mitochondrial tumor suppressor 1               | 3.499 | 2.68E-05  |

|              |               |                                                        |       |           |
|--------------|---------------|--------------------------------------------------------|-------|-----------|
| 1439787_at   | P2rx7         | purinergic receptor P2X, ligand-gated ion channel, 7   | 3.504 | 0.0003316 |
| 1417741_at   | Pygl          | liver glycogen phosphorylase                           | 3.505 | 0.0008156 |
| 1416303_at   | Litaf         | LPS-induced TN factor                                  | 3.505 | 9.33E-05  |
| 1433681_x_at | Capn3         | calpain 3                                              | 3.509 | 0.0001101 |
| 1436504_x_at | Apoa4         | apolipoprotein A-IV                                    | 3.511 | 0.0003019 |
| 1449419_at   | Dock8         | dedicator of cytokinesis 8                             | 3.518 | 1.49E-05  |
| 1446344_at   | Nyx           | nyctalopin                                             | 3.518 | 1.25E-05  |
| 1454893_at   | 1110013L07Rik | RIKEN cDNA 1110013L07 gene                             | 3.520 | 4.33E-05  |
| 1421269_at   | Ugcg          | UDP-glucose ceramide glucosyltransferase               | 3.526 | 3.20E-05  |
| 1426361_at   | Zc3h11a       | zinc finger CCCH type containing 11A                   | 3.528 | 9.63E-05  |
| 1451753_at   | Plxna2        | plexin A2                                              | 3.529 | 2.32E-05  |
| 1416304_at   | Litaf         | LPS-induced TN factor                                  | 3.535 | 9.88E-05  |
| 1451516_at   | Rheb1         | Ras homolog enriched in brain like 1                   | 3.535 | 3.96E-05  |
| 1417462_at   | Cap1          | CAP, adenylate cyclase-associated protein 1 (yeast)    | 3.537 | 7.69E-05  |
| 1452267_at   | Flywch1       | FLYWCH-type zinc finger 1                              | 3.539 | 3.51E-05  |
| 1424607_a_at | 100039204     | predicted gene, 100039204                              | 3.542 | 5.90E-05  |
| 1460729_at   | Rock1         | Rho-associated coiled-coil containing protein kinase 1 | 3.555 | 0.0016898 |
| 1438294_at   | Atxn1         | ataxin 1                                               | 3.563 | 0.0001035 |
| 1437462_x_at | Mmp15         | matrix metalloproteinase 15                            | 3.569 | 0.0032036 |
| 1449625_at   | NA            | NA                                                     | 3.571 | 0.0007761 |

|              |               |                                                                                                                       |       |           |
|--------------|---------------|-----------------------------------------------------------------------------------------------------------------------|-------|-----------|
| 1459008_at   | NA            | NA                                                                                                                    | 3.573 | 1.15E-05  |
| 1454680_at   | D5Erttd579e   | DNA segment,<br>Chr 5, ERATO<br>Doi 579,<br>expressed                                                                 | 3.578 | 3.88E-05  |
| 1417761_at   | Apoa4         | apolipoprotein A-<br>IV                                                                                               | 3.579 | 0.0002383 |
| 1448617_at   | Cd53          | CD53 antigen                                                                                                          | 3.583 | 0.0003855 |
| 1450199_a_at | Stab1         | stabilin 1                                                                                                            | 3.586 | 0.0003348 |
| 1453240_a_at | Gcap14        | granule cell<br>antiserum<br>positive 14                                                                              | 3.594 | 0.0006307 |
| 1438716_at   | AI451617      | expressed<br>sequence<br>AI451617                                                                                     | 3.597 | 4.46E-05  |
| 1417965_at   | Plekha1       | pleckstrin<br>homology<br>domain<br>containing,<br>family A<br>(phosphoinositid<br>e binding<br>specific)<br>member 1 | 3.598 | 4.18E-05  |
| 1426714_at   | Slc46a1       | solute carrier<br>family 46,<br>member 1                                                                              | 3.600 | 0.0001408 |
| 1434904_at   | Hivep2        | human<br>immunodeficien<br>cy virus type I<br>enhancer<br>binding protein 2                                           | 3.601 | 7.65E-05  |
| 1453163_at   | Ppp1r12a      | protein<br>phosphatase 1,<br>regulatory<br>(inhibitor)<br>subunit 12A                                                 | 3.603 | 0.0001881 |
| 1438606_a_at | Clic4         | chloride<br>intracellular<br>channel 4<br>(mitochondrial)                                                             | 3.609 | 7.54E-05  |
| 1453403_at   | 2210019111Rik | RIKEN cDNA<br>2210019111<br>gene                                                                                      | 3.612 | 6.38E-05  |
| 1416338_at   | Sh3gl1        | SH3-domain<br>GRB2-like 1                                                                                             | 3.617 | 3.59E-05  |
| 1437918_at   | 4930539E08Rik | RIKEN cDNA<br>4930539E08<br>gene                                                                                      | 3.620 | 0.000113  |

|              |               |                                                         |       |           |
|--------------|---------------|---------------------------------------------------------|-------|-----------|
| 1459889_at   | Clca3         | chloride channel calcium activated 3                    | 3.621 | 4.66E-05  |
| 1423066_at   | Dnmt3a        | DNA methyltransferase 3A                                | 3.626 | 2.44E-05  |
| 1424502_at   | Oit1          | oncoprotein induced transcript 1                        | 3.628 | 2.74E-05  |
| 1424084_at   | Rod1          | ROD1 regulator of differentiation 1 (S. pombe)          | 3.628 | 0.0001904 |
| 1459098_at   | NA            | NA                                                      | 3.629 | 0.0001582 |
| 1417601_at   | Rgs1          | regulator of G-protein signaling 1                      | 3.630 | 0.0004306 |
| 1426906_at   | Ifi205        | interferon activated gene 205                           | 3.636 | 0.0004612 |
| 1419508_at   | Ripk1         | receptor (TNFRSF)-interacting serine-threonine kinase 1 | 3.641 | 2.54E-05  |
| 1456064_at   | AI504432      | expressed sequence AI504432                             | 3.641 | 0.0002757 |
| 1430470_at   | 5730411F24Rik | RIKEN cDNA 5730411F24 gene                              | 3.648 | 6.63E-05  |
| 1435749_at   | Gda           | guanine deaminase                                       | 3.649 | 0.0006621 |
| 1424609_a_at | 100039204     | predicted gene, 100039204                               | 3.649 | 6.19E-05  |
| 1426774_at   | Parp12        | poly (ADP-ribose) polymerase family, member 12          | 3.650 | 2.79E-05  |
| 1419613_at   | Col7a1        | collagen, type VII, alpha 1                             | 3.651 | 0.0004621 |
| 1460378_a_at | Tes           | testis derived transcript                               | 3.655 | 2.03E-05  |
| 1439808_at   | A130090K04Rik | RIKEN cDNA A130090K04 gene                              | 3.660 | 0.0007102 |
| 1428767_at   | Gsdmd         | gasdermin D                                             | 3.662 | 0.0001296 |

|              |               |                                                           |       |           |
|--------------|---------------|-----------------------------------------------------------|-------|-----------|
| 1425396_a_at | Lck           | lymphocyte protein tyrosine kinase                        | 3.671 | 0.0015361 |
| 1460081_at   | Syt7          | synaptotagmin VII                                         | 3.673 | 0.0007401 |
| 1442581_at   | Ksr1          | kinase suppressor of ras 1                                | 3.675 | 7.40E-06  |
| 1451860_a_at | Trim30        | tripartite motif-containing 30                            | 3.678 | 4.80E-05  |
| 1450109_s_at | Abcc2         | ATP-binding cassette, sub-family C (CFTR/MRP), member 2   | 3.680 | 0.0002499 |
| 1451299_at   | Prkx          | protein kinase, X-linked                                  | 3.680 | 4.45E-05  |
| 1442277_at   | Chka          | choline kinase alpha                                      | 3.681 | 0.0001865 |
| 1420611_at   | Prkacb        | protein kinase, cAMP dependent, catalytic, beta           | 3.683 | 0.0001879 |
| 1452277_at   | Arsg          | arylsulfatase G                                           | 3.686 | 0.0010968 |
| 1416689_at   | Tuft1         | tuftelin 1                                                | 3.693 | 3.22E-05  |
| 1439863_at   | Ugcg          | UDP-glucose ceramide glucosyltransferase                  | 3.705 | 6.00E-06  |
| 1448749_at   | Plek          | pleckstrin                                                | 3.709 | 0.0001192 |
| 1432962_at   | 2610024D14Rik | RIKEN cDNA 2610024D14 gene                                | 3.711 | 7.18E-05  |
| 1432004_a_at | Dnm2          | dynamamin 2                                               | 3.714 | 4.03E-05  |
| 1445534_at   | Flnb          | filamin, beta                                             | 3.720 | 0.0001802 |
| 1429487_at   | Ppp1r12a      | protein phosphatase 1, regulatory (inhibitor) subunit 12A | 3.730 | 1.35E-05  |
| 1452329_at   | Plekhn1       | pleckstrin homology domain containing, family N member 1  | 3.733 | 0.0002237 |
| 1425227_a_at | Atp6v0a1      | ATPase, H+ transporting, lysosomal V0 subunit A1          | 3.738 | 0.0001094 |
| 1422054_a_at | Skil          | SKI-like                                                  | 3.742 | 0.000168  |

|              |               |                                                   |       |           |
|--------------|---------------|---------------------------------------------------|-------|-----------|
| 1427164_at   | Il13ra1       | interleukin 13 receptor, alpha 1                  | 3.752 | 8.40E-06  |
| 1455905_at   | 2610507B11Rik | RIKEN cDNA 2610507B11 gene                        | 3.755 | 0.0002154 |
| 1448803_at   | Golga4        | golgi autoantigen, golgin subfamily a, 4          | 3.756 | 2.03E-05  |
| 1436336_at   | Pthr1         | peptidyl-tRNA hydrolase 1 homolog (S. cerevisiae) | 3.764 | 8.66E-05  |
| 1435144_at   | NA            | NA                                                | 3.776 | 0.0001012 |
| 1433804_at   | Jak1          | Janus kinase 1                                    | 3.781 | 2.72E-05  |
| 1419448_at   | Tbc1d1        | TBC1 domain family, member 1                      | 3.808 | 4.93E-05  |
| 1424965_at   | Lpxn          | leupaxin                                          | 3.808 | 1.47E-05  |
| 1435939_s_at | Hepacam2      | HEPACAM family member 2                           | 3.820 | 4.60E-06  |
| 1444182_at   | 2210010C17Rik | RIKEN cDNA 2210010C17 gene                        | 3.823 | 6.80E-06  |
| 1428573_at   | Chn2          | chimerin (chimaerin) 2                            | 3.834 | 5.43E-05  |
| 1453196_a_at | Oasl2         | 2@#%&-5@#%& oligoadenylate synthetase-like 2      | 3.837 | 7.98E-05  |
| 1427610_at   | NA            | NA                                                | 3.844 | 4.98E-05  |
| 1437176_at   | Nlrc5         | NLR family, CARD domain containing 5              | 3.845 | 0.0003224 |
| 1435653_at   | NA            | NA                                                | 3.853 | 2.67E-05  |
| 1426808_at   | Lgals3        | lectin, galactose binding, soluble 3              | 3.855 | 6.56E-05  |
| 1429694_at   | 4930402H24Rik | RIKEN cDNA 4930402H24 gene                        | 3.860 | 4.70E-05  |
| 1439610_at   | Rab27b        | RAB27b, member RAS oncogene family                | 3.866 | 0.0002023 |



|              |           |                                                           |       |           |
|--------------|-----------|-----------------------------------------------------------|-------|-----------|
| 1453281_at   | Pik3cd    | phosphatidylinositol 3-kinase catalytic delta polypeptide | 3.874 | 4.66E-05  |
| 1425732_a_at | Mxi1      | Max interacting protein 1                                 | 3.875 | 0.0001069 |
| 1460603_at   | Samd9l    | sterile alpha motif domain containing 9-like              | 3.880 | 4.57E-05  |
| 1452771_s_at | Acsl3     | acyl-CoA synthetase long-chain family member 3            | 3.881 | 1.45E-05  |
| 1425002_at   | Sectm1a   | secreted and transmembrane 1A                             | 3.883 | 5.63E-05  |
| 1436746_at   | Wnk1      | WNK lysine deficient protein kinase 1                     | 3.891 | 0.0002389 |
| 1460192_at   | Osbpl1a   | oxysterol binding protein-like 1A                         | 3.893 | 0.0001541 |
| 1419279_at   | Pip4k2a   | phosphatidylinositol-5-phosphate 4-kinase, type II, alpha | 3.897 | 0.0001011 |
| 1424040_at   | Mtap7d1   | microtubule-associated protein 7 domain containing 1      | 3.899 | 3.39E-05  |
| 1426284_at   | Krt20     | keratin 20                                                | 3.900 | 1.64E-05  |
| 1419055_a_at | Ptpn21    | protein tyrosine phosphatase, non-receptor type 21        | 3.906 | 5.00E-06  |
| 1429272_a_at | Apol7a    | apolipoprotein L 7a                                       | 3.909 | 8.74E-05  |
| 1440193_at   | Ankrd12   | ankyrin repeat domain 12                                  | 3.912 | 0.0001225 |
| 1432374_a_at | D5Wsu178e | DNA segment, Chr 5, Wayne State University 178, expressed | 3.930 | 2.28E-05  |

|              |               |                                                        |       |           |
|--------------|---------------|--------------------------------------------------------|-------|-----------|
| 1448487_at   | Lrrfip1       | leucine rich repeat (in FLII) interacting protein 1    | 3.931 | 0.0003579 |
| 1426153_a_at | Dsg2          | desmoglein 2                                           | 3.933 | 2.95E-05  |
| 1421855_at   | Fgl2          | fibrinogen-like protein 2                              | 3.940 | 3.93E-05  |
| 1439691_at   | D5Ert579e     | DNA segment, Chr 5, ERATO Doi 579, expressed           | 3.950 | 7.50E-06  |
| 1434082_at   | Pctk2         | PCTAIRE-motif protein kinase 2                         | 3.956 | 7.00E-06  |
| 1441986_at   | Zcchc6        | zinc finger, CCHC domain containing 6                  | 3.960 | 2.67E-05  |
| 1418539_a_at | Ptpre         | protein tyrosine phosphatase, receptor type, E         | 3.964 | 1.00E-05  |
| 1452205_x_at | Tcrb-J        | T-cell receptor beta, joining region                   | 3.968 | 7.55E-05  |
| 1420505_a_at | Stxbp1        | syntaxin binding protein 1                             | 3.979 | 5.39E-05  |
| 1436054_at   | 9130227C08Rik | RIKEN cDNA 9130227C08Rik gene                          | 3.987 | 5.90E-06  |
| 1429882_at   | 6820431F20Rik | RIKEN cDNA 6820431F20 gene                             | 3.994 | 5.10E-05  |
| 1417395_at   | Klf4          | Kruppel-like factor 4 (gut)                            | 3.996 | 3.76E-05  |
| 1424090_at   | Sdcbp2        | syndecan binding protein (syntenin) 2                  | 3.999 | 2.31E-05  |
| 1444371_at   | A630007B06Rik | RIKEN cDNA A630007B06 gene                             | 4.001 | 5.90E-06  |
| 1445695_at   | NA            | NA                                                     | 4.004 | 1.08E-05  |
| 1421396_at   | Pcsk1         | proprotein convertase subtilisin/kexin type 1          | 4.008 | 7.39E-05  |
| 1451779_at   | Pyroxd1       | pyridine nucleotide-disulphide oxidoreductase domain 1 | 4.022 | 1.58E-05  |

|              |               |                                                                     |       |           |
|--------------|---------------|---------------------------------------------------------------------|-------|-----------|
| 1419186_at   | St8sia4       | ST8 alpha-N-acetyl-neuraminide alpha-2,8-sialyltransferase 4        | 4.025 | 0.0001082 |
| 1456088_at   | Xiap          | X-linked inhibitor of apoptosis                                     | 4.034 | 4.05E-05  |
| 1456623_at   | Tpm1          | tropomyosin 1, alpha                                                | 4.063 | 6.84E-05  |
| 1440795_x_at | Rabep2        | rabaptin, RAB GTPase binding effector protein 2                     | 4.066 | 2.06E-05  |
| 1436169_at   | C730029A08Rik | RIKEN cDNA C730029A08 gene                                          | 4.069 | 0.0001217 |
| 1439348_at   | S100a10       | S100 calcium binding protein A10 (calpactin)                        | 4.080 | 5.10E-06  |
| 1428066_at   | Ccdc120       | coiled-coil domain containing 120                                   | 4.080 | 2.78E-05  |
| 1439037_at   | Ddx17         | DEAD (Asp-Glu-Ala-Asp) box polypeptide 17                           | 4.100 | 0.0004666 |
| 1460242_at   | Cd55          | CD55 antigen                                                        | 4.103 | 2.90E-05  |
| 1417214_at   | Rab27b        | RAB27b, member RAS oncogene family                                  | 4.105 | 9.62E-05  |
| 1440770_at   | Bcl2          | B-cell leukemia/lymphoma 2                                          | 4.108 | 0.0001215 |
| 1457528_at   | Slc4a7        | solute carrier family 4, sodium bicarbonate cotransporter, member 7 | 4.111 | 0.0005775 |
| 1429692_s_at | Gch1          | GTP cyclohydrolase 1                                                | 4.123 | 9.50E-06  |
| 1449908_at   | Gip           | gastric inhibitory polypeptide                                      | 4.125 | 1.46E-05  |
| 1434046_at   | AA467197      | expressed sequence AA467197                                         | 4.134 | 2.18E-05  |

|                              |          |                                                                        |       |           |
|------------------------------|----------|------------------------------------------------------------------------|-------|-----------|
| AFFX-PyruCarbMur/L09192_3_at | Pcx      | pyruvate carboxylase                                                   | 4.138 | 6.10E-05  |
| 1428497_at                   | Secisbp2 | SECIS binding protein 2                                                | 4.149 | 6.33E-05  |
| 1428936_at                   | Atp2b1   | ATPase, Ca <sup>++</sup> transporting, plasma membrane 1               | 4.152 | 8.96E-05  |
| 1422847_a_at                 | Prkcd    | protein kinase C, delta                                                | 4.156 | 1.01E-05  |
| 1437205_at                   | Tcf25    | transcription factor 25 (basic helix-loop-helix)                       | 4.162 | 1.11E-05  |
| 1449292_at                   | Rb1cc1   | RB1-inducible coiled-coil 1                                            | 4.169 | 0.000184  |
| 1436959_x_at                 | Nelf     | nasal embryonic LHRH factor                                            | 4.171 | 1.60E-05  |
| 1417843_s_at                 | Eps8l2   | EPS8-like 2                                                            | 4.181 | 1.45E-05  |
| 1429196_at                   | Rabgap1l | RAB GTPase activating protein 1-like                                   | 4.184 | 3.82E-05  |
| 1453286_at                   | Plxna2   | plexin A2                                                              | 4.185 | 4.50E-06  |
| 1439109_at                   | Ccdc68   | coiled-coil domain containing 68                                       | 4.213 | 1.21E-05  |
| 1424287_at                   | Prkx     | protein kinase, X-linked                                               | 4.217 | 4.49E-05  |
| 1420808_at                   | Ncoa4    | nuclear receptor coactivator 4                                         | 4.221 | 7.85E-05  |
| 1421065_at                   | Jak2     | Janus kinase 2                                                         | 4.223 | 2.04E-05  |
| 1416809_at                   | Cyp3a11  | cytochrome P450, family 3, subfamily a, polypeptide 11                 | 4.226 | 0.0001532 |
| 1425862_a_at                 | Pik3c2a  | phosphatidylinositol 3-kinase, C2 domain containing, alpha polypeptide | 4.244 | 3.49E-05  |
| 1456956_at                   | Ikzf2    | IKAROS family zinc finger 2                                            | 4.276 | 8.24E-05  |
| 1423393_at                   | Clic4    | chloride intracellular channel 4 (mitochondrial)                       | 4.277 | 6.00E-06  |

|              |               |                                                    |       |           |
|--------------|---------------|----------------------------------------------------|-------|-----------|
| 1441622_at   | EG433023      | predicted gene,<br>EG433023                        | 4.288 | 0.0005275 |
| 1424626_at   | 2010003K11Rik | RIKEN cDNA<br>2010003K11<br>gene                   | 4.291 | 4.19E-05  |
| 1415885_at   | Chgb          | chromogranin B                                     | 4.293 | 3.60E-06  |
| 1420499_at   | Gch1          | GTP<br>cyclohydrolase 1                            | 4.297 | 9.10E-06  |
| 1417558_at   | Fyn           | Fyn proto-<br>oncogene                             | 4.303 | 1.34E-05  |
| 1418149_at   | Chga          | chromogranin A                                     | 4.311 | 1.33E-05  |
| 1437308_s_at | F2r           | coagulation<br>factor II<br>(thrombin)<br>receptor | 4.322 | 2.54E-05  |
| 1438069_a_at | Rbm5          | RNA binding<br>motif protein 5                     | 4.323 | 1.35E-05  |
| 1438751_at   | Slc30a10      | solute carrier<br>family 30,<br>member 10          | 4.324 | 2.83E-05  |
| 1451628_a_at | Ank3          | ankyrin 3,<br>epithelial                           | 4.325 | 3.69E-05  |
| 1422868_s_at | Gda           | guanine<br>deaminase                               | 4.334 | 0.0005471 |
| 1419247_at   | Rgs2          | regulator of G-<br>protein signaling<br>2          | 4.334 | 1.42E-05  |
| 1426485_at   | Ubxn4         | UBX domain<br>protein 4                            | 4.337 | 6.11E-05  |
| 1417961_a_at | Trim30        | tripartite motif-<br>containing 30                 | 4.339 | 7.07E-05  |
| 1455462_at   | Adcy2         | adenylate<br>cyclase 2                             | 4.348 | 5.20E-05  |
| 1456061_at   | Gimap8        | GTPase, IMAP<br>family member 8                    | 4.350 | 7.43E-05  |
| 1437432_a_at | Trim12        | tripartite motif-<br>containing 12                 | 4.350 | 0.0001326 |
| 1430309_at   | Nipbl         | Nipped-B<br>homolog<br>(Drosophila)                | 4.366 | 0.0001322 |
| 1437542_at   | Ikzf2         | IKAROS family<br>zinc finger 2                     | 4.378 | 1.99E-05  |
| 1425084_at   | Gimap7        | GTPase, IMAP<br>family member 7                    | 4.380 | 4.63E-05  |
| 1442819_at   | Rhbdl2        | rhomboid,<br>veinlet-like 2<br>(Drosophila)        | 4.387 | 6.30E-06  |

|              |               |                                                           |       |           |
|--------------|---------------|-----------------------------------------------------------|-------|-----------|
| 1450494_x_at | Ceacam1       | carcinoembryonic antigen-related cell adhesion molecule 1 | 4.393 | 0.0020012 |
| 1457605_at   | NA            | NA                                                        | 4.398 | 0.0002017 |
| 1440582_at   | Itch          | itchy, E3 ubiquitin protein ligase                        | 4.419 | 0.0001572 |
| 1429215_at   | 2310058N22Rik | RIKEN cDNA 2310058N22 gene                                | 4.425 | 1.80E-06  |
| 1441467_at   | NA            | NA                                                        | 4.434 | 3.50E-06  |
| 1445697_at   | NA            | NA                                                        | 4.448 | 2.60E-06  |
| 1435343_at   | Dock10        | dedicator of cytokinesis 10                               | 4.456 | 0.0001372 |
| 1451154_a_at | Cugbp2        | CUG triplet repeat, RNA binding protein 2                 | 4.456 | 3.83E-05  |
| 1449009_at   | Tgtp          | T-cell specific GTPase                                    | 4.464 | 2.65E-05  |
| 1426276_at   | Ifih1         | interferon induced with helicase C domain 1               | 4.475 | 3.47E-05  |
| 1424749_at   | Wdfy1         | WD repeat and FYVE domain containing 1                    | 4.484 | 2.45E-05  |
| 1450006_at   | Ncoa4         | nuclear receptor coactivator 4                            | 4.506 | 2.35E-05  |
| 1429123_at   | Rab27a        | RAB27A, member RAS oncogene family                        | 4.513 | 7.50E-06  |
| 1443937_at   | NA            | NA                                                        | 4.516 | 1.56E-05  |
| 1450355_a_at | Capg          | capping protein (actin filament), gelsolin-like           | 4.519 | 0.0001374 |
| 1453080_at   | Apol7a        | apolipoprotein L 7a                                       | 4.523 | 9.68E-05  |
| 1448605_at   | Rhoc          | ras homolog gene family, member C                         | 4.524 | 1.51E-05  |
| 1431530_a_at | Tspan5        | tetraspanin 5                                             | 4.532 | 1.76E-05  |
| 1448409_at   | Lrmp          | lymphoid-restricted membrane protein                      | 4.534 | 1.69E-05  |
| 1429036_at   | Otop3         | otopetrin 3                                               | 4.539 | 0.0001488 |

|              |               |                                                                 |       |           |
|--------------|---------------|-----------------------------------------------------------------|-------|-----------|
| 1426872_at   | Fcgbp         | Fc fragment of IgG binding protein                              | 4.555 | 6.30E-06  |
| 1444421_at   | Etohd2        | ethanol decreased 2                                             | 4.558 | 6.00E-06  |
| 1430556_at   | Spag9         | sperm associated antigen 9                                      | 4.559 | 1.60E-05  |
| 1427203_at   | Myo15b        | myosin XVB                                                      | 4.573 | 3.73E-05  |
| 1419835_s_at | Plec1         | plectin 1                                                       | 4.593 | 2.98E-05  |
| 1448566_at   | Slc40a1       | solute carrier family 40 (iron-regulated transporter), member 1 | 4.597 | 2.02E-05  |
| 1450531_at   | H2-BI         | histocompatibility 2, blastocyst                                | 4.598 | 0.0001965 |
| 1418776_at   | 5830443L24Rik | RIKEN cDNA 5830443L24 gene                                      | 4.603 | 5.10E-05  |
| 1449455_at   | Hck           | hemopoietic cell kinase                                         | 4.608 | 2.90E-06  |
| 1459216_at   | Tdrd7         | tudor domain containing 7                                       | 4.611 | 2.10E-05  |
| 1458083_at   | NA            | NA                                                              | 4.616 | 0.0001865 |
| 1439934_at   | Slc30a10      | solute carrier family 30, member 10                             | 4.619 | 6.50E-06  |
| 1456377_x_at | Limd2         | LIM domain containing 2                                         | 4.627 | 8.50E-05  |
| 1422785_at   | Rasa2         | RAS p21 protein activator 2                                     | 4.630 | 1.41E-05  |
| 1455033_at   | B430201A12Rik | RIKEN cDNA B430201A12 gene                                      | 4.636 | 3.20E-05  |
| 1436271_at   | Apol7b        | apolipoprotein L 7b                                             | 4.641 | 3.82E-05  |
| 1429947_a_at | Zbp1          | Z-DNA binding protein 1                                         | 4.663 | 0.0001942 |
| 1417620_at   | Rac2          | RAS-related C3 botulinum substrate 2                            | 4.664 | 0.000112  |
| 1448885_at   | Rap2b         | RAP2B, member of RAS oncogene family                            | 4.664 | 6.00E-06  |
| 1434794_at   | Rhof          | ras homolog gene family, member f                               | 4.665 | 1.26E-05  |
| 1426471_at   | Zfp52         | zinc finger protein 52                                          | 4.675 | 0.0002847 |

|              |               |                                                                   |       |           |
|--------------|---------------|-------------------------------------------------------------------|-------|-----------|
| 1418946_at   | St3gal1       | ST3 beta-galactoside alpha-2,3-sialyltransferase 1                | 4.684 | 6.40E-06  |
| 1426971_at   | Ube1l         | ubiquitin-activating enzyme E1-like                               | 4.685 | 1.84E-05  |
| 1443858_at   | EG667823      | predicted gene, EG667823                                          | 4.690 | 1.13E-05  |
| 1442123_at   | 2010012P19Rik | RIKEN cDNA 2010012P19 gene                                        | 4.695 | 1.25E-05  |
| 1420425_at   | Prdm1         | PR domain containing 1, with ZNF domain                           | 4.696 | 4.59E-05  |
| 1460086_at   | Rc3h2         | ring finger and CCCH-type zinc finger domains 2                   | 4.704 | 8.22E-05  |
| 1445757_at   | Tbx3          | T-box 3                                                           | 4.710 | 1.00E-05  |
| 1421008_at   | Rsad2         | radical S-adenosyl methionine domain containing 2                 | 4.728 | 3.19E-05  |
| 1452741_s_at | Gpd2          | glycerol phosphate dehydrogenase 2, mitochondrial                 | 4.733 | 9.49E-05  |
| 1426970_a_at | Ube1l         | ubiquitin-activating enzyme E1-like                               | 4.742 | 9.60E-06  |
| 1437082_at   | Akap9         | A kinase (PRKA) anchor protein (yotiao) 9                         | 4.757 | 0.0016248 |
| 1418580_at   | Rtp4          | receptor transporter protein 4                                    | 4.760 | 1.21E-05  |
| 1436649_at   | Ikzf3         | IKAROS family zinc finger 3                                       | 4.762 | 1.46E-05  |
| 1428595_at   | Slc6a19       | solute carrier family 6 (neurotransmitter transporter), member 19 | 4.779 | 0.0001854 |
| 1456262_at   | Rbm5          | RNA binding motif protein 5                                       | 4.791 | 1.43E-05  |



|              |          |                                                                            |       |           |
|--------------|----------|----------------------------------------------------------------------------|-------|-----------|
| 1427240_at   | Dock6    | dedicator of cytokinesis 6                                                 | 4.800 | 1.05E-05  |
| 1415834_at   | Dusp6    | dual specificity phosphatase 6                                             | 4.827 | 1.48E-05  |
| 1427718_a_at | Mdm2     | transformed mouse 3T3 cell double minute 2                                 | 4.835 | 1.20E-06  |
| 1426636_a_at | Xiap     | X-linked inhibitor of apoptosis                                            | 4.837 | 2.89E-05  |
| 1419658_at   | H2-T23   | histocompatibility 2, T region locus 23                                    | 4.843 | 8.98E-05  |
| 1452360_a_at | Jarid1a  | jumonji, AT rich interactive domain 1A (Rbp2 like)                         | 4.846 | 0.0002914 |
| 1418148_at   | Abhd1    | abhydrolase domain containing 1                                            | 4.853 | 2.40E-06  |
| 1434316_at   | Chsy1    | chondroitin sulfate synthase 1                                             | 4.855 | 8.07E-05  |
| 1422637_at   | Rassf5   | Ras association (RalGDS/AF-6) domain family member 5                       | 4.857 | 8.60E-06  |
| 1450753_at   | Nkg7     | natural killer cell group 7 sequence                                       | 4.902 | 1.56E-05  |
| 1439141_at   | Gpr18    | G protein-coupled receptor 18                                              | 4.905 | 2.84E-05  |
| 1418069_at   | Apoc2    | apolipoprotein C-II                                                        | 4.921 | 2.63E-05  |
| 1449424_at   | Plek2    | pleckstrin 2                                                               | 4.948 | 1.70E-06  |
| 1420461_at   | Mst1r    | macrophage stimulating 1 receptor (c-met-related tyrosine kinase)          | 4.953 | 1.20E-06  |
| 1417909_at   | Serpinc1 | serine (or cysteine) peptidase inhibitor, clade C (antithrombin), member 1 | 4.953 | 1.90E-06  |

|              |               |                                                            |       |           |
|--------------|---------------|------------------------------------------------------------|-------|-----------|
| 1448183_a_at | Hif1a         | hypoxia inducible factor 1, alpha subunit                  | 4.976 | 2.70E-06  |
| 1438439_at   | Gpr171        | G protein-coupled receptor 171                             | 4.978 | 0.0004182 |
| 1417812_a_at | Lamb3         | laminin, beta 3                                            | 4.993 | 0.0005792 |
| 1418931_at   | Reg4          | regenerating islet-derived family, member 4                | 4.995 | 1.50E-06  |
| 1448364_at   | Ccng2         | cyclin G2                                                  | 4.996 | 2.46E-05  |
| 1421594_a_at | Syt12         | synaptotagmin-like 2                                       | 5.012 | 1.46E-05  |
| 1416246_a_at | Coro1a        | coronin, actin binding protein 1A                          | 5.031 | 4.32E-05  |
| 1456307_s_at | Adcy7         | adenylate cyclase 7                                        | 5.056 | 0.000395  |
| 1436538_at   | Ankrd37       | ankyrin repeat domain 37                                   | 5.073 | 2.40E-06  |
| 1450505_a_at | 1810015C04Rik | RIKEN cDNA 1810015C04 gene                                 | 5.076 | 7.00E-07  |
| 1426725_s_at | Ets1          | E26 avian leukemia oncogene 1, 5' domain                   | 5.085 | 2.92E-05  |
| 1425471_x_at | NA            | NA                                                         | 5.105 | 7.60E-06  |
| 1426454_at   | Arhgdib       | Rho, GDP dissociation inhibitor (GDI) beta                 | 5.105 | 4.70E-06  |
| 1427347_s_at | Tubb2a        | tubulin, beta 2a                                           | 5.107 | 1.43E-05  |
| 1422124_a_at | Ptprc         | protein tyrosine phosphatase, receptor type, C             | 5.140 | 2.37E-05  |
| 1423184_at   | Itsn2         | intersectin 2                                              | 5.143 | 6.60E-06  |
| 1443923_at   | Akap13        | A kinase (PRKA) anchor protein 13                          | 5.155 | 2.22E-05  |
| 1426603_at   | Rnasel        | ribonuclease L (2',5'-oligoadenylate synthetase-dependent) | 5.170 | 1.09E-05  |

|              |               |                                                                               |       |          |
|--------------|---------------|-------------------------------------------------------------------------------|-------|----------|
| 1421854_at   | Fgl2          | fibrinogen-like protein 2                                                     | 5.182 | 9.00E-07 |
| 1418201_at   | Plekhg2       | pleckstrin homology domain containing, family G (with RhoGef domain) member 2 | 5.196 | 1.91E-05 |
| 1438558_x_at | Foxq1         | forkhead box Q1                                                               | 5.211 | 6.90E-06 |
| 1437479_x_at | Tbx3          | T-box 3                                                                       | 5.214 | 6.80E-06 |
| 1416306_at   | Clca3         | chloride channel calcium activated 3                                          | 5.214 | 4.20E-06 |
| 1451447_at   | Cuedc1        | CUE domain containing 1                                                       | 5.217 | 1.78E-05 |
| 1456120_at   | 3110001I20Rik | RIKEN cDNA 3110001I20 gene                                                    | 5.226 | 1.40E-06 |
| 1449991_at   | Cd244         | CD244 natural killer cell receptor 2B4                                        | 5.228 | 1.60E-05 |
| 1446330_at   | NA            | NA                                                                            | 5.234 | 7.10E-06 |
| 1423946_at   | Pdlim2        | PDZ and LIM domain 2                                                          | 5.268 | 3.40E-06 |
| 1422632_at   | Ctsw          | cathepsin W                                                                   | 5.284 | 5.81E-05 |
| 1428083_at   | 2310043N10Rik | RIKEN cDNA 2310043N10 gene                                                    | 5.301 | 7.00E-07 |
| 1419226_at   | Cd96          | CD96 antigen                                                                  | 5.318 | 1.10E-05 |
| 1442881_at   | NA            | NA                                                                            | 5.321 | 9.00E-07 |
| 1452351_at   | C030027K23Rik | RIKEN cDNA C030027K23 gene                                                    | 5.341 | 2.10E-06 |
| 1417426_at   | Srgn          | serglycin                                                                     | 5.372 | 1.44E-05 |
| 1434830_at   | Mxd1          | MAX dimerization protein 1                                                    | 5.380 | 3.48E-05 |
| 1435229_at   | Gramd1b       | GRAM domain containing 1B                                                     | 5.409 | 1.34E-05 |
| 1448596_at   | Slc6a8        | solute carrier family 6 (neurotransmitter transporter, creatine), member 8    | 5.423 | 1.60E-06 |
| 1450264_a_at | Chka          | choline kinase alpha                                                          | 5.423 | 4.50E-06 |
| 1453283_at   | Pgm1          | phosphoglucomutase 1                                                          | 5.496 | 6.50E-06 |

|              |           |                                                              |       |           |
|--------------|-----------|--------------------------------------------------------------|-------|-----------|
| 1430927_at   | Ceacam18  | carcinoembryonic antigen-related cell adhesion molecule 1    | 5.511 | 1.00E-06  |
| 1426360_at   | Zc3h11a   | zinc finger CCCH type containing 11A                         | 5.513 | 2.03E-05  |
| 1438037_at   | Herc5     | hect domain and RLD 5                                        | 5.521 | 6.64E-05  |
| 1424688_at   | Creb3l3   | cAMP responsive element binding protein 3-like 3             | 5.550 | 2.40E-06  |
| 1425019_at   | Ubxn2a    | UBX domain protein 2A                                        | 5.559 | 0.0005375 |
| 1455854_a_at | Ssh1      | slingshot homolog 1 (Drosophila)                             | 5.611 | 6.00E-07  |
| 1416295_a_at | Il2rg     | interleukin 2 receptor, gamma chain                          | 5.688 | 0.0001081 |
| 1424923_at   | Serpina3g | serine (or cysteine) peptidase inhibitor, clade A, member 3G | 5.700 | 0.0001035 |
| 1457271_at   | Gm131     | gene model 131, (NCBI)                                       | 5.703 | 2.50E-06  |
| 1430234_at   | Arl14     | ADP-ribosylation factor-like 14                              | 5.713 | 3.60E-06  |
| 1426413_at   | Neurod1   | neurogenic differentiation 1                                 | 5.714 | 3.40E-06  |
| 1445233_at   | Rhbdl2    | rhomboid, veinlet-like 2 (Drosophila)                        | 5.754 | 3.30E-06  |
| 1427102_at   | Slfn4     | schlafen 4                                                   | 5.755 | 1.30E-05  |
| 1419322_at   | Fgd6      | FYVE, RhoGEF and PH domain containing 6                      | 5.783 | 1.90E-06  |
| 1449440_at   | Lpin3     | lipin 3                                                      | 5.794 | 2.40E-06  |
| 1452163_at   | Ets1      | E26 avian leukemia oncogene 1, 5' domain                     | 5.814 | 6.00E-07  |
| 1444004_at   | Thoc2     | THO complex 2                                                | 5.830 | 0.000243  |

|              |          |                                                                        |       |           |
|--------------|----------|------------------------------------------------------------------------|-------|-----------|
| 1426113_x_at | Tcra     | T-cell receptor alpha chain                                            | 5.869 | 3.11E-05  |
| 1437204_a_at | Tcf25    | transcription factor 25 (basic helix-loop-helix)                       | 5.870 | 5.00E-07  |
| 1460290_at   | Lpin2    | lipin 2                                                                | 5.903 | 5.00E-06  |
| 1431024_a_at | Arid4b   | AT rich interactive domain 4B (RBP1-like)                              | 5.911 | 4.00E-07  |
| 1425335_at   | Cd8a     | CD8 antigen, alpha chain                                               | 5.911 | 3.00E-06  |
| 1460245_at   | Klrd1    | killer cell lectin-like receptor, subfamily D, member 1                | 5.923 | 3.60E-06  |
| 1437486_at   | Gprc5a   | G protein-coupled receptor, family C, group 5, member A                | 5.966 | 2.90E-05  |
| 1452653_at   | Slc25a22 | solute carrier family 25 (mitochondrial carrier, glutamate), member 22 | 5.971 | 1.30E-06  |
| 1452260_at   | Cidec    | cell death-inducing DFFA-like effector c                               | 5.972 | 4.30E-06  |
| 1419473_a_at | Cck      | cholecystokinin                                                        | 6.035 | 1.60E-06  |
| 1446316_at   | Lpin2    | lipin 2                                                                | 6.041 | 3.70E-06  |
| 1424354_at   | Tmem140  | transmembrane protein 140                                              | 6.047 | 4.30E-06  |
| 1419734_at   | Actb     | actin, beta                                                            | 6.058 | 3.00E-07  |
| 1436904_at   | Med13    | mediator complex subunit 13                                            | 6.074 | 2.00E-06  |
| 1442256_at   | Prkcd    | protein kinase C, delta                                                | 6.077 | 5.00E-07  |
| 1444458_at   | NA       | NA                                                                     | 6.127 | 1.10E-06  |
| 1453127_at   | Ppm1j    | protein phosphatase 1J                                                 | 6.206 | 2.27E-05  |
| 1425538_x_at | Ceacam1  | carcinoembryonic antigen-related cell adhesion molecule 1              | 6.212 | 0.0003054 |

|              |               |                                                        |       |          |
|--------------|---------------|--------------------------------------------------------|-------|----------|
| 1422828_at   | Cd3d          | CD3 antigen, delta polypeptide                         | 6.219 | 3.00E-06 |
| 1437110_at   | 2810474O19Rik | RIKEN cDNA 2810474O19 gene                             | 6.231 | 2.14E-05 |
| 1416933_at   | Por           | P450 (cytochrome) oxidoreductase                       | 6.249 | 4.00E-07 |
| 1428358_at   | 1810010M01Rik | RIKEN cDNA 1810010M01 gene                             | 6.278 | 3.00E-07 |
| 1424518_at   | Apol9a        | apolipoprotein L 9a                                    | 6.298 | 2.70E-06 |
| 1419231_s_at | Krt12         | keratin 12                                             | 6.309 | 3.16E-05 |
| 1449514_at   | Grk5          | G protein-coupled receptor kinase 5                    | 6.328 | 1.90E-06 |
| 1441026_at   | Parp4         | poly (ADP-ribose) polymerase family, member 4          | 6.354 | 2.00E-07 |
| 1457084_at   | Nlrp9b        | NLR family, pyrin domain containing 9B                 | 6.361 | 3.16E-05 |
| 1445843_at   | Chd2          | chromodomain helicase DNA binding protein 2            | 6.382 | 1.10E-06 |
| 1428851_at   | 1300014I06Rik | RIKEN cDNA 1300014I06 gene                             | 6.392 | 5.20E-06 |
| 1416770_at   | Stk25         | serine/threonine kinase 25 (yeast)                     | 6.397 | 7.00E-07 |
| 1418395_at   | Slc47a1       | solute carrier family 47, member 1                     | 6.464 | 5.70E-06 |
| 1417651_at   | Cyp2c29       | cytochrome P450, family 2, subfamily c, polypeptide 29 | 6.564 | 9.20E-06 |
| 1443698_at   | Xaf1          | XIAP associated factor 1                               | 6.565 | 1.40E-06 |
| 1418126_at   | Ccl5          | chemokine (C-C motif) ligand 5                         | 6.573 | 1.32E-05 |
| 1422983_at   | Itgb6         | integrin beta 6                                        | 6.579 | 2.00E-06 |

|              |               |                                                           |       |           |
|--------------|---------------|-----------------------------------------------------------|-------|-----------|
| 1427630_x_at | Ceacam1       | carcinoembryonic antigen-related cell adhesion molecule 1 | 6.582 | 0.0001445 |
| 1436058_at   | Rsad2         | radical S-adenosyl methionine domain containing 2         | 6.640 | 1.47E-05  |
| 1438311_at   | 2010002M12Rik | RIKEN cDNA 2010002M12 gene                                | 6.699 | 2.90E-06  |
| 1447541_s_at | Itgae         | integrin alpha E, epithelial-associated                   | 6.716 | 1.36E-05  |
| 1422705_at   | Pmepa1        | prostate transmembrane protein, androgen induced 1        | 6.730 | 2.70E-06  |
| 1460330_at   | Anxa3         | annexin A3                                                | 6.757 | 3.00E-07  |
| 1416690_at   | Gtpbp2        | GTP binding protein 2                                     | 6.779 | 1.50E-06  |
| 1436385_at   | Ganc          | glucosidase, alpha; neutral C                             | 6.852 | 9.60E-06  |
| 1448437_a_at | Gtpbp2        | GTP binding protein 2                                     | 6.882 | 1.40E-06  |
| 1422812_at   | Cxcr6         | chemokine (C-X-C motif) receptor 6                        | 6.904 | 3.75E-05  |
| 1440314_at   | NA            | NA                                                        | 6.972 | 1.80E-06  |
| 1427440_a_at | Afm           | afamin                                                    | 6.976 | 1.00E-07  |
| 1434372_at   | AW112010      | expressed sequence AW112010                               | 7.013 | 3.00E-07  |
| 1451257_at   | Acsl6         | acyl-CoA synthetase long-chain family member 6            | 7.040 | 2.51E-05  |
| 1460218_at   | Cd52          | CD52 antigen                                              | 7.052 | 4.00E-07  |
| 1432281_a_at | Itgb6         | integrin beta 6                                           | 7.087 | 1.00E-06  |
| 1418340_at   | Fcer1g        | Fc receptor, IgE, high affinity I, gamma polypeptide      | 7.124 | 2.00E-07  |
| 1449216_at   | Itgae         | integrin alpha E, epithelial-associated                   | 7.127 | 2.00E-07  |
| 1441818_at   | NA            | NA                                                        | 7.130 | 1.40E-06  |

|              |               |                                                                                              |       |          |
|--------------|---------------|----------------------------------------------------------------------------------------------|-------|----------|
| 1424375_s_at | Gimap4        | GTPase, IMAP family member 4                                                                 | 7.136 | 6.10E-06 |
| 1438783_at   | NA            | NA                                                                                           | 7.161 | 2.30E-06 |
| 1430383_at   | Ceacam20      | carcinoembryonic antigen-related cell adhesion molecule 20                                   | 7.164 | 3.00E-07 |
| 1429550_at   | Entpd8        | ectonucleoside triphosphate diphosphohydrolase 8                                             | 7.193 | 3.00E-07 |
| 1457491_at   | Plekha1       | pleckstrin homology domain containing, family A (phosphoinositide binding specific) member 1 | 7.250 | 4.90E-06 |
| 1426047_a_at | Ptprr         | protein tyrosine phosphatase, receptor type, R                                               | 7.372 | 9.00E-07 |
| 1452405_x_at | A130082M07Rik | RIKEN cDNA A130082M07 gene                                                                   | 7.446 | 1.60E-06 |
| 1430191_at   | 9130004J05Rik | RIKEN cDNA 9130004J05 gene                                                                   | 7.495 | 7.00E-07 |
| 1446281_at   | NA            | NA                                                                                           | 7.503 | 2.50E-06 |
| 1426670_at   | Agrn          | agrin                                                                                        | 7.525 | 1.40E-06 |
| 1419230_at   | Krt12         | keratin 12                                                                                   | 7.550 | 7.90E-06 |
| 1455104_at   | Mxd1          | MAX dimerization protein 1                                                                   | 7.637 | 4.90E-06 |
| 1450792_at   | Tyrobp        | TYRO protein tyrosine kinase binding protein                                                 | 7.660 | 7.00E-07 |
| 1435313_at   | Cd200r4       | Cd200 receptor 4                                                                             | 7.675 | 4.10E-06 |
| 1451006_at   | Xdh           | xanthine dehydrogenase                                                                       | 7.716 | 1.20E-06 |
| 1448752_at   | Car2          | carbonic anhydrase 2                                                                         | 7.797 | 4.00E-07 |



|              |                   |                                                             |       |          |
|--------------|-------------------|-------------------------------------------------------------|-------|----------|
| 1426452_a_at | Rab30             | RAB30, member RAS oncogene family                           | 7.846 | 1.00E-06 |
| 1418191_at   | Usp18             | ubiquitin specific peptidase 18                             | 7.872 | 1.20E-06 |
| 1450783_at   | lfit1             | interferon-induced protein with tetratricopeptide repeats 1 | 7.931 | 7.60E-06 |
| 1455180_at   | Gcom1             | GRINL1A complex locus                                       | 7.951 | 2.00E-07 |
| 1421009_at   | Rsad2             | radical S-adenosyl methionine domain containing 2           | 8.045 | 1.30E-06 |
| 1434129_s_at | Lhfp12            | lipoma HMGIC fusion partner-like 2                          | 8.057 | 3.90E-06 |
| 1417133_at   | Pmp22             | peripheral myelin protein 22                                | 8.060 | 1.30E-06 |
| 1450572_at   | Akp3              | alkaline phosphatase 3, intestine, not Mn requiring         | 8.167 | 3.53E-05 |
| 1425832_a_at | Cxcr6             | chemokine (C-X-C motif) receptor 6                          | 8.188 | 1.08E-05 |
| 1435529_at   | OTTMUSG0000016644 | predicted gene, OTTMUSG0000016644                           | 8.190 | 2.40E-06 |
| 1427655_a_at | A630038E17Rik     | RIKEN cDNA A630038E17 gene                                  | 8.206 | 2.00E-06 |
| 1417898_a_at | Gzma              | granzyme A                                                  | 8.212 | 4.00E-07 |
| 1452837_at   | Lpin2             | lipin 2                                                     | 8.240 | 1.00E-07 |
| 1418219_at   | Il15              | interleukin 15                                              | 8.285 | 1.00E-07 |
| 1448980_at   | Ghrl              | ghrelin                                                     | 8.387 | 1.00E-07 |
| 1427608_a_at | Tcrg-V1           | T-cell receptor gamma, variable 1                           | 8.473 | 1.00E-07 |
| 1419711_at   | Cd7               | CD7 antigen                                                 | 8.526 | 2.00E-07 |
| 1439566_at   | Gprn3             | GPRIN family member 3                                       | 8.529 | 5.20E-06 |
| 1442305_at   | Gtpbp2            | GTP binding protein 2                                       | 8.589 | 4.00E-07 |

|              |          |                                                                         |       |          |
|--------------|----------|-------------------------------------------------------------------------|-------|----------|
| 1429060_at   | Malat1   | metastasis associated lung adenocarcinoma transcript 1 (non-coding RNA) | 8.638 | 9.00E-07 |
| 1451777_at   | Ddx60    | DEAD (Asp-Glu-Ala-Asp) box polypeptide 60                               | 8.647 | 5.60E-06 |
| 1454742_at   | Rasgef1b | RasGEF domain family, member 1B                                         | 8.705 | 3.60E-06 |
| 1426412_at   | Neurod1  | neurogenic differentiation 1                                            | 8.722 | < 1e-07  |
| 1449235_at   | Fasl     | Fas ligand (TNF superfamily, member 6)                                  | 8.756 | 3.10E-06 |
| 1423249_at   | Nktr     | natural killer tumor recognition sequence                               | 8.767 | 4.00E-07 |
| 1416691_at   | Gtpbp2   | GTP binding protein 2                                                   | 8.828 | 1.00E-07 |
| 1430984_at   | Azin1    | antizyme inhibitor 1                                                    | 9.048 | 1.00E-07 |
| 1418739_at   | Sgk2     | serum/glucocorticoid regulated kinase 2                                 | 9.180 | 8.00E-07 |
| 1435402_at   | Gramd1b  | GRAM domain containing 1B                                               | 9.346 | 7.00E-07 |
| 1422706_at   | Pmepa1   | prostate transmembrane protein, androgen induced 1                      | 9.354 | 1.00E-07 |
| 1439016_x_at | Sprr2a   | small proline-rich protein 2A                                           | 9.574 | 1.00E-07 |
| 1423150_at   | Scg5     | secretogranin V                                                         | 9.628 | 5.00E-07 |
| 1419178_at   | Cd3g     | CD3 antigen, gamma polypeptide                                          | 9.824 | 1.00E-07 |
| 1438403_s_at | Malat1   | metastasis associated lung adenocarcinoma transcript 1 (non-coding RNA) | 9.829 | 8.00E-06 |
| 1419060_at   | Gzmb     | granzyme B                                                              | 9.856 | 6.00E-07 |

|              |           |                                                              |        |          |
|--------------|-----------|--------------------------------------------------------------|--------|----------|
| 1449457_at   | Acot12    | acyl-CoA thioesterase 12                                     | 10.338 | 1.60E-06 |
| 1447394_at   | EG622139  | predicted gene, EG622139                                     | 10.564 | 1.00E-07 |
| 1417552_at   | Fap       | fibroblast activation protein                                | 10.848 | 1.00E-07 |
| 1422188_s_at | Tcrg-V3   | T-cell receptor gamma, variable 3                            | 10.942 | 1.00E-07 |
| 1450678_at   | Itgb2     | integrin beta 2                                              | 10.957 | 2.30E-06 |
| 1425933_a_at | Nt5c2     | 5@#%&-nucleotidase, cytosolic II                             | 11.024 | 1.00E-07 |
| 1424339_at   | Oasl1     | 2@#%&-5@#%& oligoadenylate synthetase-like 1                 | 11.101 | 1.00E-07 |
| 1422189_x_at | Tcrg-V4   | T-cell receptor gamma, variable 4                            | 11.136 | 5.00E-07 |
| 1444078_at   | Cd8a      | CD8 antigen, alpha chain                                     | 12.543 | 2.00E-07 |
| 1421375_a_at | S100a6    | S100 calcium binding protein A6 (calcyclin)                  | 12.599 | < 1e-07  |
| 1439114_at   | Ddx60     | DEAD (Asp-Glu-Ala-Asp) box polypeptide 60                    | 13.184 | 5.00E-07 |
| 1437258_at   | 100042999 | predicted gene, 100042999                                    | 13.366 | 3.00E-07 |
| 1449133_at   | Sprr1a    | small proline-rich protein 1A                                | 13.390 | 1.00E-07 |
| 1448680_at   | Serpina1c | serine (or cysteine) peptidase inhibitor, clade A, member 1c | 13.448 | 1.00E-07 |
| 1457554_at   | Apob      | apolipoprotein B                                             | 13.789 | < 1e-07  |
| 1419524_at   | Tph1      | tryptophan hydroxylase 1                                     | 13.896 | < 1e-07  |
| 1450521_a_at | Tcrg-V4   | T-cell receptor gamma, variable 4                            | 14.297 | < 1e-07  |
| 1451673_at   | Cd8a      | CD8 antigen, alpha chain                                     | 14.369 | < 1e-07  |
| 1418805_at   | Sct       | secretin                                                     | 14.376 | < 1e-07  |

|              |               |                                                                                      |        |          |
|--------------|---------------|--------------------------------------------------------------------------------------|--------|----------|
| 1424962_at   | Tm4sf4        | transmembrane<br>4 superfamily<br>member 4                                           | 15.583 | < 1e-07  |
| 1422860_at   | Nts           | neurotensin                                                                          | 15.768 | < 1e-07  |
| 1418189_s_at | Ramp2         | receptor<br>(calcitonin)<br>activity<br>modifying<br>protein 2                       | 15.828 | 9.60E-06 |
| 1450618_a_at | Sprr2a        | small proline-<br>rich protein 2A                                                    | 15.974 | < 1e-07  |
| 1449907_at   | Bcmo1         | beta-carotene<br>15,15@#%&-<br>monooxygenase                                         | 16.801 | < 1e-07  |
| 1452378_at   | Malat1        | metastasis<br>associated lung<br>adenocarcinoma<br>transcript 1 (non-<br>coding RNA) | 17.414 | 1.00E-07 |
| 1418661_at   | Abhd2         | abhydrolase<br>domain<br>containing 2                                                | 18.662 | 1.00E-07 |
| 1418188_a_at | Ramp2         | receptor<br>(calcitonin)<br>activity<br>modifying<br>protein 2                       | 19.202 | 5.60E-06 |
| 1427285_s_at | Malat1        | metastasis<br>associated lung<br>adenocarcinoma<br>transcript 1 (non-<br>coding RNA) | 19.448 | < 1e-07  |
| 1455449_at   | 2010107G12Rik | RIKEN cDNA<br>2010107G12<br>gene                                                     | 21.357 | < 1e-07  |
| 1448964_at   | S100g         | S100 calcium<br>binding protein<br>G                                                 | 25.008 | < 1e-07  |
| 1428547_at   | Nt5e          | 5@#%&<br>nucleotidase,<br>ecto                                                       | 30.343 | < 1e-07  |
| 1420437_at   | Indo          | indoleamine-<br>pyrrole 2,3<br>dioxygenase                                           | 41.992 | < 1e-07  |
| 1428361_x_at | Hba-a1        | hemoglobin<br>alpha, adult<br>chain 1                                                | 45.925 | < 1e-07  |

|              |         |                                                                                           |         |         |
|--------------|---------|-------------------------------------------------------------------------------------------|---------|---------|
| 1417184_s_at | Hbb-b2  | hemoglobin,<br>beta adult minor<br>chain                                                  | 49.960  | < 1e-07 |
| 1439727_at   | Clca6   | chloride channel<br>calcium<br>activated 6                                                | 51.441  | < 1e-07 |
| 1452757_s_at | Hba-a1  | hemoglobin<br>alpha, adult<br>chain 1                                                     | 58.920  | < 1e-07 |
| 1439260_a_at | Enpp3   | ectonucleotide<br>pyrophosphatas<br>e/phosphodieste<br>rase 3                             | 71.019  | < 1e-07 |
| 1427302_at   | Enpp3   | ectonucleotide<br>pyrophosphatas<br>e/phosphodieste<br>rase 3                             | 75.342  | < 1e-07 |
| 1452384_at   | Enpp3   | ectonucleotide<br>pyrophosphatas<br>e/phosphodieste<br>rase 3                             | 76.969  | < 1e-07 |
| 1417976_at   | Ada     | adenosine<br>deaminase                                                                    | 80.917  | < 1e-07 |
| 1450639_at   | Slc28a2 | solute carrier<br>family 28<br>(sodium-coupled<br>nucleoside<br>transporter),<br>member 2 | 131.038 | < 1e-07 |
