# Supplementary material
Source: PubMed Central journal article supplement (PMC2906237)
Supplement: NIHMS206558-supplement-5.pdf [file NIHMS206558-supplement-5.pdf]

**Apc<sup>1638N/+</sup> F1/F10 (villus/crypt)**

| Probe set    | Gene symbol | Gene name                                                 | Fold change | p value  |
|--------------|-------------|-----------------------------------------------------------|-------------|----------|
| 1436857_at   | Defcr21     | defensin related cryptdin 21                              | 0.027       | 8.70E-06 |
| 1450709_at   | Defcr5      | defensin related cryptdin 5                               | 0.032       | 1.22E-05 |
| 1438364_x_at | Ang4        | angiogenin, ribonuclease A family, member 4               | 0.037       | 1.53E-05 |
| 1418550_x_at | Defcr-rs1   | defensin related sequence cryptdin peptide (paneth cells) | 0.050       | 8.60E-06 |
| 1429378_x_at | AY761184    | cDNA sequence AY761184                                    | 0.050       | 5.50E-06 |
| 1421317_x_at | Myb         | myeloblastosis oncogene                                   | 0.064       | 3.77E-05 |
| 1418165_at   | Itln1       | intelectin 1 (galactofuranose binding)                    | 0.074       | 4.60E-05 |
| 1439426_x_at | Lyz2        | lysozyme 2                                                | 0.075       | 8.30E-06 |
| 1441788_s_at | Dkc1        | dyskeratosis congenita 1, dyskerin homolog (human)        | 0.078       | 7.60E-06 |
| 1436996_x_at | Lyz1        | lysozyme 1                                                | 0.086       | 5.70E-06 |
| 1450194_a_at | Myb         | myeloblastosis oncogene                                   | 0.086       | 8.50E-06 |
| 1416698_a_at | Cks1b       | CDC28 protein kinase 1b                                   | 0.086       | 1.00E-07 |
| 1439377_x_at | Cdc20       | cell division cycle 20 homolog (S. cerevisiae)            | 0.087       | 1.80E-06 |
| 1415849_s_at | Stmn1       | stathmin 1                                                | 0.088       | 1.00E-07 |

|              |               |                                                                                           |       |           |
|--------------|---------------|-------------------------------------------------------------------------------------------|-------|-----------|
| 1435945_a_at | Kcnn4         | potassium intermediate/small conductance calcium-activated channel, subfamily N, member 4 | 0.089 | 5.90E-06  |
| 1444952_a_at | Nucks1        | nuclear casein kinase and cyclin-dependent kinase substrate 1                             | 0.089 | 3.84E-05  |
| 1449061_a_at | Prim1         | DNA primase, p49 subunit                                                                  | 0.090 | 4.43E-05  |
| 1426817_at   | Mki67         | antigen identified by monoclonal antibody Ki 67                                           | 0.093 | 5.00E-07  |
| 1450631_x_at | Defcr6        | defensin related cryptdin 6                                                               | 0.101 | 2.48E-05  |
| 1437060_at   | Olfm4         | olfactomedin 4                                                                            | 0.108 | 4.87E-05  |
| 1440922_at   | 9130208D14Rik | RIKEN cDNA 9130208D14 gene                                                                | 0.109 | 1.26E-05  |
| 1419086_at   | Fgfbp1        | fibroblast growth factor binding protein 1                                                | 0.110 | 0.0001658 |
| 1448595_a_at | Bex1          | brain expressed gene 1                                                                    | 0.111 | 2.37E-05  |
| 1455035_s_at | Nol5a         | nucleolar protein 5A                                                                      | 0.112 | 5.00E-07  |
| 1429432_at   | Bat2d         | BAT2 domain containing 1                                                                  | 0.116 | 0.0013014 |
| 1416039_x_at | Cyr61         | cysteine rich protein 61                                                                  | 0.121 | 4.00E-06  |
| 1452661_at   | Tfrc          | transferrin receptor                                                                      | 0.121 | 2.91E-05  |
| 1440832_at   | Ang4          | angiogenin, ribonuclease A family, member 4                                               | 0.125 | 6.65E-05  |
| 1439436_x_at | Incenp        | inner centromere protein                                                                  | 0.125 | 5.00E-07  |

|              |              |                                                                                |       |           |
|--------------|--------------|--------------------------------------------------------------------------------|-------|-----------|
| 1415851_a_at | Impdh2       | inosine 5-phosphate dehydrogenase 2                                            | 0.126 | 4.00E-07  |
| 1420731_a_at | Csrp2        | cysteine and glycine-rich protein 2                                            | 0.126 | 3.85E-05  |
| 1417622_at   | Slc12a2      | solute carrier family 12, member 2                                             | 0.126 | 3.30E-06  |
| 1436836_x_at | LOC100047856 | similar to calponin 3, acidic                                                  | 0.130 | 2.70E-06  |
| 1431214_at   | LOC67527     | murine leukemia retrovirus                                                     | 0.131 | 3.72E-05  |
| 1454991_at   | Slc7a1       | solute carrier family 7 (cationic amino acid transporter, y+ system), member 1 | 0.134 | 2.60E-06  |
| 1418094_s_at | Car4         | carbonic anhydrase 4                                                           | 0.135 | 4.50E-06  |
| 1456541_x_at | Atad3a       | ATPase family, AAA domain containing 3A                                        | 0.135 | 5.10E-06  |
| 1417910_at   | Ccna2        | cyclin A2                                                                      | 0.136 | 8.00E-06  |
| 1448627_s_at | Pbk          | PDZ binding kinase                                                             | 0.137 | 5.10E-06  |
| 1448780_at   | Slc12a2      | solute carrier family 12, member 2                                             | 0.137 | 0.0001018 |
| 1441858_at   | NA           | NA                                                                             | 0.140 | 1.61E-05  |
| 1417457_at   | Cks2         | CDC28 protein kinase regulatory subunit 2                                      | 0.140 | 2.60E-06  |
| 1450682_at   | Fabp6        | fatty acid binding protein 6, ileal (gastrotropin)                             | 0.140 | 0.0010241 |
| 1420142_s_at | Pa2g4        | proliferation-associated 2G4                                                   | 0.146 | 9.00E-07  |
| 1426351_at   | Hspd1        | heat shock protein 1 (chaperonin)                                              | 0.148 | 6.20E-06  |

|              |                   |                                                                                                         |       |           |
|--------------|-------------------|---------------------------------------------------------------------------------------------------------|-------|-----------|
| 1431213_a_at | LOC67527          | murine leukemia retrovirus                                                                              | 0.148 | 2.00E-05  |
| 1448245_at   | Rpsa              | ribosomal protein SA                                                                                    | 0.149 | 1.99E-05  |
| 1418499_a_at | Kcne3             | potassium voltage-gated channel, Isk-related subfamily, gene 3                                          | 0.149 | 0.000142  |
| 1438178_x_at | Atad3a            | ATPase family, AAA domain containing 3A                                                                 | 0.153 | 2.20E-06  |
| 1419031_at   | Fads2             | fatty acid desaturase 2                                                                                 | 0.154 | 7.22E-05  |
| 1455319_x_at | OTTMUSG0000022847 | predicted gene, OTTMUSG0000022847                                                                       | 0.154 | 4.10E-06  |
| 1425415_a_at | Slc1a1            | solute carrier family 1 (neuronal/epithelial high affinity glutamate transporter, system Xag), member 1 | 0.155 | 0.0003849 |
| 1455540_at   | Cps1              | carbamoyl-phosphate synthetase 1                                                                        | 0.156 | 0.0002755 |
| 1426533_at   | Nol5a             | nucleolar protein 5A                                                                                    | 0.160 | 9.30E-06  |
| 1437343_x_at | Atad3a            | ATPase family, AAA domain containing 3A                                                                 | 0.160 | 3.63E-05  |
| 1451260_at   | Aldh1b1           | aldehyde dehydrogenase 1 family, member B1                                                              | 0.160 | 1.71E-05  |
| 1455821_x_at | C1qbp             | complement component 1, q subcomponent binding protein                                                  | 0.162 | 1.40E-06  |
| 1455990_at   | Kif23             | kinesin family member 23                                                                                | 0.163 | 7.02E-05  |

|              |                   |                                                                                     |       |          |
|--------------|-------------------|-------------------------------------------------------------------------------------|-------|----------|
| 1448314_at   | Cdc2a             | cell division cycle 2 homolog A (S. pombe)                                          | 0.163 | 1.34E-05 |
| 1425993_a_at | Hsph1             | heat shock 105kDa/110kDa protein 1                                                  | 0.164 | 5.60E-06 |
| 1419513_a_at | Ect2              | ect2 oncogene                                                                       | 0.165 | 2.14E-05 |
| 1436759_x_at | LOC100047856      | similar to calponin 3, acidic                                                       | 0.168 | 4.70E-06 |
| 1452242_at   | Cep55             | centrosomal protein 55                                                              | 0.168 | 3.05E-05 |
| 1438511_a_at | 1190002H23Rik     | RIKEN cDNA 1190002H23 gene                                                          | 0.168 | 1.38E-05 |
| 1437610_x_at | OTTMUSG0000016200 | predicted gene, OTTMUSG0000016200                                                   | 0.169 | 4.30E-06 |
| 1419474_a_at | Ehf               | ets homologous factor                                                               | 0.174 | 3.72E-05 |
| 1437716_x_at | Kif22             | kinesin family member 22                                                            | 0.175 | 8.00E-06 |
| 1453377_at   | Sh2d4a            | SH2 domain containing 4A                                                            | 0.175 | 2.70E-06 |
| 1457434_s_at | Ptpla             | protein tyrosine phosphatase-like (proline instead of catalytic arginine), member a | 0.175 | 2.26E-05 |
| 1439399_a_at | Snhg1             | small nucleolar RNA host gene (non-protein coding) 1                                | 0.175 | 3.50E-06 |
| 1423846_x_at | Tuba1b            | tubulin, alpha 1B                                                                   | 0.177 | 2.00E-06 |
| 1452040_a_at | Cdca3             | cell division cycle associated 3                                                    | 0.177 | 1.37E-05 |
| 1434280_at   | NA                | NA                                                                                  | 0.178 | 2.00E-06 |
| 1426741_a_at | Fastkd2           | FAST kinase domains 2                                                               | 0.179 | 1.69E-05 |
| 1418715_at   | Pank1             | pantothenate kinase 1                                                               | 0.179 | 4.51E-05 |

|              |               |                                                                   |       |           |
|--------------|---------------|-------------------------------------------------------------------|-------|-----------|
| 1433674_a_at | Snord22       | small nucleolar RNA, C/D box 22                                   | 0.180 | 1.31E-05  |
| 1419153_at   | 2810417H13Rik | RIKEN cDNA 2810417H13 gene                                        | 0.181 | 2.70E-06  |
| 1415772_at   | Ncl           | nucleolin                                                         | 0.182 | 5.57E-05  |
| 1417822_at   | D17H6S56E-5   | DNA segment, Chr 17, human D6S56E 5                               | 0.182 | 2.80E-06  |
| 1455950_x_at | Rpl35         | ribosomal protein L35                                             | 0.183 | 4.80E-06  |
| 1417420_at   | Ccnd1         | cyclin D1                                                         | 0.183 | 0.0002315 |
| 1418305_s_at | Nola1         | nucleolar protein family A, member 1 (H/ACA small nucleolar RNPs) | 0.184 | 2.63E-05  |
| 1453752_at   | Rpl17         | ribosomal protein L17                                             | 0.186 | 5.30E-06  |
| 1418369_at   | Prim1         | DNA primase, p49 subunit                                          | 0.186 | 5.70E-06  |
| 1417713_at   | Eif2s2        | eukaryotic translation initiation factor 2, subunit 2 (beta)      | 0.186 | 8.72E-05  |
| 1450668_s_at | Hspe1         | heat shock protein 1 (chaperonin 10)                              | 0.186 | 2.60E-06  |
| 1424615_at   | Frag1         | FGF receptor activating protein 1                                 | 0.187 | 1.61E-05  |
| 1437313_x_at | Hmgb2         | high mobility group box 2                                         | 0.188 | 5.20E-06  |
| 1416236_a_at | Mpzl2         | myelin protein zero-like 2                                        | 0.188 | 4.05E-05  |
| 1416802_a_at | Cdca5         | cell division cycle associated 5                                  | 0.188 | 2.90E-06  |
| 1420381_a_at | Rpl31         | ribosomal protein L31                                             | 0.190 | 2.57E-05  |
| 1457139_at   | Auts2         | autism susceptibility candidate 2                                 | 0.190 | 0.0006326 |

|              |           |                                                                 |       |           |
|--------------|-----------|-----------------------------------------------------------------|-------|-----------|
| 1437671_x_at | Prss23    | protease, serine, 23                                            | 0.191 | 3.51E-05  |
| 1429295_s_at | Trip13    | thyroid hormone receptor interactor 13                          | 0.193 | 3.17E-05  |
| 1418287_a_at | Dmbt1     | deleted in malignant brain tumors 1                             | 0.193 | 0.0002123 |
| 1439257_x_at | Rpn1      | ribophorin I                                                    | 0.193 | 5.20E-06  |
| 1448949_at   | Car4      | carbonic anhydrase 4                                            | 0.193 | 0.0007959 |
| 1434231_x_at | Rpl35     | ribosomal protein L35                                           | 0.194 | 6.50E-06  |
| 1453572_a_at | Plp2      | proteolipid protein 2                                           | 0.196 | 0.0003077 |
| 1434748_at   | Ckap2     | cytoskeleton associated protein 2                               | 0.196 | 2.68E-05  |
| 1456438_x_at | Rpn1      | ribophorin I                                                    | 0.196 | 7.40E-06  |
| 1438940_x_at | 100040836 | predicted gene, 100040836                                       | 0.197 | 1.39E-05  |
| 1424046_at   | Bub1      | budding uninhibited by benzimidazoles 1 homolog (S. cerevisiae) | 0.197 | 7.65E-05  |
| 1417936_at   | Ccl9      | chemokine (C-C motif) ligand 9                                  | 0.197 | 0.0001088 |
| 1455869_at   | NA        | NA                                                              | 0.197 | 0.0001752 |
| 1433510_x_at | 100043718 | predicted gene, 100043718                                       | 0.197 | 9.30E-06  |
| 1438943_x_at | Rpn1      | ribophorin I                                                    | 0.198 | 7.90E-06  |
| 1438133_a_at | Cyr61     | cysteine rich protein 61                                        | 0.198 | 5.22E-05  |
| 1419964_s_at | Hdgf      | hepatoma-derived growth factor                                  | 0.199 | 0.0002252 |
| 1436707_x_at | Ncaph     | non-SMC condensin I complex, subunit H                          | 0.200 | 5.20E-06  |
| 1436840_x_at | Rpl35     | ribosomal protein L35                                           | 0.201 | 6.10E-06  |

|              |               |                                             |       |           |
|--------------|---------------|---------------------------------------------|-------|-----------|
| 1416893_at   | 3110001A13Rik | RIKEN cDNA 3110001A13 gene                  | 0.202 | 7.64E-05  |
| 1436688_x_at | Rpl14         | ribosomal protein L14                       | 0.204 | 3.50E-06  |
| 1451012_a_at | Csda          | cold shock domain protein A                 | 0.205 | 8.05E-05  |
| 1436847_s_at | Cdca8         | cell division cycle associated 8            | 0.205 | 6.10E-05  |
| 1425178_s_at | Shmt1         | serine hydroxymethyltransferase 1 (soluble) | 0.206 | 3.37E-05  |
| 1439740_s_at | Uck2          | uridine-cytidine kinase 2                   | 0.206 | 4.22E-05  |
| 1433928_a_at | Rpl13a        | ribosomal protein L13a                      | 0.206 | 3.90E-06  |
| 1425952_a_at | Gcg           | glucagon                                    | 0.207 | 0.0001824 |
| 1435800_a_at | Csda          | cold shock domain protein A                 | 0.207 | 8.00E-06  |
| 1424511_at   | Aurka         | aurora kinase A                             | 0.208 | 9.61E-05  |
| 1416606_s_at | Nola2         | nucleolar protein family A, member 2        | 0.211 | 5.80E-06  |
| 1434278_at   | Mtm1          | X-linked myotubular myopathy gene 1         | 0.212 | 6.50E-06  |
| 1452426_x_at | NA            | NA                                          | 0.212 | 5.05E-05  |
| 1438626_x_at | Rpl14         | ribosomal protein L14                       | 0.212 | 3.82E-05  |
| 1418264_at   | Cenpk         | centromere protein K                        | 0.213 | 1.79E-05  |
| 1443104_at   | NA            | NA                                          | 0.213 | 8.26E-05  |
| 1433688_x_at | Rpl14         | ribosomal protein L14                       | 0.214 | 5.60E-06  |
| 1428951_at   | Nol8          | nucleolar protein 8                         | 0.215 | 0.0054995 |
| 1416453_x_at | Rps12         | ribosomal protein S12                       | 0.215 | 1.06E-05  |
| 1439374_x_at | Rps10         | ribosomal protein S10                       | 0.216 | 0.000101  |
| 1437687_x_at | Fkbp9         | FK506 binding protein 9                     | 0.217 | 8.36E-05  |



|              |               |                                                    |       |           |
|--------------|---------------|----------------------------------------------------|-------|-----------|
| 1416076_at   | Ccnb1-rs1     | cyclin B1, related sequence 1                      | 0.218 | 7.18E-05  |
| 1455897_x_at | Hmgn1         | high mobility group nucleosomal binding domain 1   | 0.218 | 4.90E-06  |
| 1417346_at   | Pycard        | PYD and CARD domain containing                     | 0.219 | 0.0001842 |
| 1450435_at   | L1cam         | L1 cell adhesion molecule                          | 0.220 | 4.50E-06  |
| 1456057_x_at | Tmem109       | transmembrane protein 109                          | 0.220 | 0.000104  |
| 1438961_s_at | Blmh          | bleomycin hydrolase                                | 0.223 | 1.01E-05  |
| 1453107_s_at | Pebp1         | phosphatidylethanolamine binding protein 1         | 0.223 | 0.0005376 |
| 1424760_a_at | Smyd2         | SET and MYND domain containing 2                   | 0.224 | 5.65E-05  |
| 1438434_at   | Arhgap11a     | Rho GTPase activating protein 11A                  | 0.224 | 4.85E-05  |
| 1417821_at   | D17H6S56E-5   | DNA segment, Chr 17, human D6S56E 5                | 0.224 | 0.0006313 |
| 1421089_a_at | 2610028A01Rik | RIKEN cDNA 2610028A01 gene                         | 0.225 | 0.0005424 |
| 1438096_a_at | Dtymk         | deoxythymidylate kinase                            | 0.225 | 1.57E-05  |
| 1417911_at   | Ccna2         | cyclin A2                                          | 0.225 | 5.00E-05  |
| 1438507_x_at | Rpl14         | ribosomal protein L14                              | 0.225 | 9.60E-06  |
| 1451823_at   | Clca4         | chloride channel calcium activated 4               | 0.226 | 0.005166  |
| 1438016_at   | Dkc1          | dyskeratosis congenita 1, dyskerin homolog (human) | 0.226 | 1.53E-05  |

|              |               |                                                    |       |           |
|--------------|---------------|----------------------------------------------------|-------|-----------|
| 1434624_x_at | Rps9          | ribosomal protein S9                               | 0.228 | 1.07E-05  |
| 1416520_x_at | Rpl36         | ribosomal protein L36                              | 0.228 | 5.60E-06  |
| 1433675_at   | Snord22       | small nucleolar RNA, C/D box 22                    | 0.229 | 0.0001189 |
| 1423804_a_at | Idi1          | isopentenyl-diphosphate delta isomerase            | 0.229 | 8.30E-05  |
| 1449243_a_at | Rps19         | ribosomal protein S19                              | 0.230 | 5.60E-06  |
| 1423547_at   | Lyz2          | lysozyme 2                                         | 0.230 | 6.71E-05  |
| 1460581_a_at | Rpl13         | ribosomal protein L13                              | 0.231 | 3.64E-05  |
| 1417926_at   | Ncapg2        | non-SMC condensin II complex, subunit G2           | 0.231 | 6.23E-05  |
| 1438015_at   | Dkc1          | dyskeratosis congenita 1, dyskerin homolog (human) | 0.231 | 0.0001019 |
| 1415879_a_at | Rplp2         | ribosomal protein, large P2                        | 0.233 | 1.50E-05  |
| 1455245_x_at | Rpl13         | ribosomal protein L13                              | 0.233 | 1.90E-05  |
| 1415852_at   | Impdh2        | inosine 5-phosphate dehydrogenase 2                | 0.233 | 2.80E-05  |
| 1434358_x_at | Rps21         | ribosomal protein S21                              | 0.233 | 3.87E-05  |
| 1438938_x_at | Phb2          | prohibitin 2                                       | 0.234 | 1.57E-05  |
| 1418566_s_at | Nudcd2        | NudC domain containing 2                           | 0.234 | 9.47E-05  |
| 1455001_x_at | Rpl13a        | ribosomal protein L13a                             | 0.234 | 1.60E-05  |
| 1423431_a_at | Mybbp1a       | MYB binding protein (P160) 1a                      | 0.235 | 8.07E-05  |
| 1459860_x_at | Trim2         | tripartite motif-containing 2                      | 0.235 | 3.07E-05  |
| 1428106_at   | 1300001I01Rik | RIKEN cDNA 1300001I01 gene                         | 0.235 | 8.99E-05  |

|              |               |                                                                                                          |       |           |
|--------------|---------------|----------------------------------------------------------------------------------------------------------|-------|-----------|
| 1446368_at   | 9130221J18Rik | RIKEN cDNA<br>9130221J18<br>gene                                                                         | 0.236 | 0.0041866 |
| 1428670_at   | 2610305J24Rik | RIKEN cDNA<br>2610305J24<br>gene                                                                         | 0.236 | 9.95E-05  |
| 1449490_at   | Mbd4          | methyl-CpG<br>binding domain<br>protein 4                                                                | 0.236 | 0.0044678 |
| 1426713_s_at | Eprs          | glutamyl-prolyl-<br>tRNA synthetase                                                                      | 0.237 | 0.0001299 |
| 1455287_at   | Cdk6          | cyclin-dependent<br>kinase 6                                                                             | 0.239 | 5.46E-05  |
| 1452713_a_at | Wdr57         | WD repeat<br>domain 57 (U5<br>snRNP specific)                                                            | 0.239 | 0.0010489 |
| 1438094_x_at | Ola1          | Obg-like ATPase<br>1                                                                                     | 0.239 | 0.0002456 |
| 1439439_x_at | Eef1d         | eukaryotic<br>translation<br>elongation factor<br>1 delta (guanine<br>nucleotide<br>exchange<br>protein) | 0.240 | 9.92E-05  |
| 1424854_at   | Hist1h4i      | histone cluster 1,<br>H4i                                                                                | 0.241 | 4.17E-05  |
| 1416184_s_at | Hmga1         | high mobility<br>group AT-hook 1                                                                         | 0.241 | 2.36E-05  |
| 1416042_s_at | Nasp          | nuclear<br>autoantigenic<br>sperm protein<br>(histone-binding)                                           | 0.241 | 6.93E-05  |
| 1435306_a_at | Kif11         | kinesin family<br>member 11                                                                              | 0.241 | 0.0001085 |
| 1448264_a_at | Elf3i         | eukaryotic<br>translation<br>initiation factor 3,<br>subunit I                                           | 0.242 | 9.40E-06  |
| 1429129_at   | Lrrcc1        | leucine rich<br>repeat and coiled-<br>coil domain<br>containing 1                                        | 0.242 | 9.41E-05  |

|              |               |                                                       |       |           |
|--------------|---------------|-------------------------------------------------------|-------|-----------|
| 1454620_x_at | LOC100043734  | similar to ribosomal protein S6                       | 0.242 | 1.89E-05  |
| 1433432_x_at | Rps12         | ribosomal protein S12                                 | 0.242 | 3.44E-05  |
| 1428694_at   | 5033413D16Rik | RIKEN cDNA 5033413D16 gene                            | 0.242 | 0.0007668 |
| 1452708_a_at | Luc7l         | Luc7 homolog (S. cerevisiae)-like                     | 0.243 | 0.0085533 |
| 1448252_a_at | Eef1b2        | eukaryotic translation elongation factor 1 beta 2     | 0.244 | 8.50E-06  |
| 1452597_at   | 2310061C15Rik | RIKEN cDNA 2310061C15 gene                            | 0.244 | 0.0003272 |
| 1454694_a_at | Top2a         | topoisomerase (DNA) II alpha                          | 0.244 | 3.82E-05  |
| 1422966_a_at | Tfrc          | transferrin receptor                                  | 0.244 | 0.0001292 |
| 1425815_a_at | Hmmr          | hyaluronan mediated motility receptor (RHAMM)         | 0.245 | 2.84E-05  |
| 1424278_a_at | Birc5         | baculoviral IAP repeat-containing 5                   | 0.245 | 0.0001093 |
| 1439463_x_at | 2810416G20Rik | RIKEN cDNA 2810416G20 gene                            | 0.246 | 0.0014688 |
| 1454856_x_at | 100038991     | predicted gene, 100038991                             | 0.246 | 1.40E-05  |
| 1431028_a_at | Pank1         | pantothenate kinase 1                                 | 0.247 | 6.34E-05  |
| 1433656_a_at | Gnl3          | guanine nucleotide binding protein-like 3 (nucleolar) | 0.247 | 1.64E-05  |
| 1437467_at   | Alcam         | activated leukocyte cell adhesion molecule            | 0.247 | 0.0002074 |
| 1451052_at   | Pdf           | peptide deformylase (mitochondrial)                   | 0.248 | 4.05E-05  |

|                              |        |                                                                                |       |           |
|------------------------------|--------|--------------------------------------------------------------------------------|-------|-----------|
| 1416807_at                   | Rpl36a | ribosomal protein L36a                                                         | 0.249 | 4.20E-05  |
| 1418334_at                   | Dbf4   | DBF4 homolog (S. cerevisiae)                                                   | 0.249 | 1.02E-05  |
| 1417458_s_at                 | Cks2   | CDC28 protein kinase regulatory subunit 2                                      | 0.249 | 4.62E-05  |
| 1451791_at                   | Tfpi   | tissue factor pathway inhibitor                                                | 0.249 | 1.02E-05  |
| AFFX-TransRecMur/X57349_3_at | Tfrc   | transferrin receptor                                                           | 0.251 | 2.33E-05  |
| 1420579_s_at                 | Cftr   | cystic fibrosis transmembrane conductance regulator homolog                    | 0.251 | 0.0003661 |
| 1448274_at                   | C1qbp  | complement component 1, q subcomponent binding protein                         | 0.251 | 4.93E-05  |
| 1439200_x_at                 | Erdr1  | erythroid differentiation regulator 1                                          | 0.251 | 0.0003101 |
| 1449279_at                   | Gpx2   | glutathione peroxidase 2                                                       | 0.251 | 0.0002126 |
| 1420570_x_at                 | Tcl1b3 | T-cell leukemia/lymphoma 1B, 3                                                 | 0.251 | 0.0002544 |
| 1436808_x_at                 | Mcm5   | minichromosome maintenance deficient 5, cell division cycle 46 (S. cerevisiae) | 0.252 | 1.21E-05  |
| 1415771_at                   | Ncl    | nucleolin                                                                      | 0.252 | 1.21E-05  |
| 1449410_a_at                 | Gas5   | growth arrest specific 5                                                       | 0.252 | 1.11E-05  |
| 1433549_x_at                 | Rps21  | ribosomal protein S21                                                          | 0.253 | 3.86E-05  |

|              |               |                                                                                  |       |           |
|--------------|---------------|----------------------------------------------------------------------------------|-------|-----------|
| 1435303_at   | Taf4b         | TAF4B RNA polymerase II, TATA box binding protein (TBP)-associated factor        | 0.253 | 0.0002808 |
| 1455887_at   | Alg8          | asparagine-linked glycosylation 8 homolog (yeast, alpha-1,3-glucosyltransferase) | 0.253 | 0.0007259 |
| 1416283_at   | Gart          | phosphoribosylglycinamide formyltransferase                                      | 0.253 | 0.0003061 |
| 1451230_a_at | Wbp5          | WW domain binding protein 5                                                      | 0.254 | 5.10E-05  |
| 1455572_x_at | LOC100042388  | similar to ribosomal protein S18                                                 | 0.254 | 1.32E-05  |
| 1415897_a_at | Mgst1         | microsomal glutathione S-transferase 1                                           | 0.254 | 0.00256   |
| 1455384_x_at | D030056L22Rik | RIKEN cDNA D030056L22 gene                                                       | 0.255 | 0.000246  |
| 1458562_at   | NA            | NA                                                                               | 0.255 | 0.0009129 |
| 1417511_at   | Lyar          | Ly1 antibody reactive clone                                                      | 0.256 | 2.31E-05  |
| 1429499_at   | Fbxo5         | F-box protein 5                                                                  | 0.258 | 0.0002221 |
| 1452534_a_at | Hmgb2         | high mobility group box 2                                                        | 0.258 | 2.28E-05  |
| 1452954_at   | Ube2c         | ubiquitin-conjugating enzyme E2C                                                 | 0.258 | 0.0001748 |
| 1453571_at   | Depdc6        | DEP domain containing 6                                                          | 0.258 | 1.71E-05  |
| 1423666_s_at | Rpl5          | ribosomal protein L5                                                             | 0.259 | 4.39E-05  |
| 1438976_x_at | Mat2a         | methionine adenosyltransferase II, alpha                                         | 0.259 | 2.95E-05  |
| 1455767_x_at | Rpl21         | ribosomal protein L21                                                            | 0.259 | 1.20E-05  |
| 1455713_x_at | Phb2          | prohibitin 2                                                                     | 0.259 | 1.55E-05  |

|              |          |                                                            |       |           |
|--------------|----------|------------------------------------------------------------|-------|-----------|
| 1436506_a_at | Snhg6    | small nucleolar RNA host gene (non-protein coding) 6       | 0.260 | 3.79E-05  |
| 1457823_at   | Cyr61    | cysteine rich protein 61                                   | 0.261 | 0.0002257 |
| 1455956_x_at | Ccnd2    | cyclin D2                                                  | 0.261 | 0.0002277 |
| 1430288_x_at | Rps21    | ribosomal protein S21                                      | 0.261 | 3.07E-05  |
| 1436494_x_at | Trmt1    | TRM1 tRNA methyltransferase 1 homolog (S. cerevisiae)      | 0.262 | 2.41E-05  |
| 1452406_x_at | Erdr1    | erythroid differentiation regulator 1                      | 0.262 | 0.0005482 |
| 1416088_a_at | Rps15    | ribosomal protein S15                                      | 0.262 | 6.40E-05  |
| 1434678_at   | Mbnl3    | muscleblind-like 3 (Drosophila)                            | 0.262 | 0.0001779 |
| 1437246_x_at | Rps6     | ribosomal protein S6                                       | 0.263 | 6.76E-05  |
| 1455084_x_at | Shmt2    | serine hydroxymethyltransferase 2 (mitochondrial)          | 0.263 | 1.83E-05  |
| 1424618_at   | Hpd      | 4-hydroxyphenylpyruvic acid dioxygenase                    | 0.263 | 0.0037637 |
| 1426645_at   | Hsp90aa1 | heat shock protein 90, alpha (cytosolic), class A member 1 | 0.263 | 4.90E-05  |
| 1416603_at   | Rpl22    | ribosomal protein L22                                      | 0.263 | 2.72E-05  |
| 1417095_a_at | Hspa14   | heat shock protein 14                                      | 0.264 | 0.0017666 |
| 1452454_at   | Sdad1    | SDA1 domain containing 1                                   | 0.264 | 0.0046554 |
| 1427683_at   | Egr2     | early growth response 2                                    | 0.265 | 0.0024844 |

|              |                   |                                                            |       |           |
|--------------|-------------------|------------------------------------------------------------|-------|-----------|
| 1437267_x_at | Hnrnp1            | heterogeneous nuclear ribonucleoprotein H1                 | 0.265 | 0.0002359 |
| 1422460_at   | Mad2l1            | MAD2 (mitotic arrest deficient, homolog)-like 1 (yeast)    | 0.265 | 9.72E-05  |
| 1442340_x_at | Cyr61             | cysteine rich protein 61                                   | 0.265 | 0.0002997 |
| 1448635_at   | Smc2              | structural maintenance of chromosomes 2                    | 0.265 | 1.85E-05  |
| 1448265_x_at | Mpzl2             | myelin protein zero-like 2                                 | 0.265 | 0.0007919 |
| 1416641_at   | Lig1              | ligase I, DNA, ATP-dependent                               | 0.266 | 0.0002137 |
| 1448558_a_at | Pla2g4a           | phospholipase A2, group IVA (cytosolic, calcium-dependent) | 0.266 | 0.0002373 |
| 1420410_at   | Nr5a2             | nuclear receptor subfamily 5, group A, member 2            | 0.266 | 0.0012141 |
| 1456032_x_at | H2afz             | H2A histone family, member Z                               | 0.267 | 6.65E-05  |
| 1417541_at   | Hells             | helicase, lymphoid specific                                | 0.267 | 4.44E-05  |
| 1423521_at   | Lmnb1             | lamin B1                                                   | 0.267 | 9.44E-05  |
| 1420497_a_at | Cebpz             | CCAAT/enhancer binding protein zeta                        | 0.267 | 0.0024325 |
| 1443579_s_at | Depdc6            | DEP domain containing 6                                    | 0.267 | 0.0001262 |
| 1422440_at   | Cdk4              | cyclin-dependent kinase 4                                  | 0.267 | 0.0029593 |
| 1436822_x_at | ENSMUSG0000066475 | predicted gene, ENSMUSG0000066475                          | 0.267 | 5.27E-05  |
| 1460671_at   | Gpx1              | glutathione peroxidase 1                                   | 0.268 | 0.0002763 |



|              |         |                                                               |       |           |
|--------------|---------|---------------------------------------------------------------|-------|-----------|
| 1416746_at   | H2afx   | H2A histone family, member X                                  | 0.269 | 3.43E-05  |
| 1415773_at   | Ncl     | nucleolin                                                     | 0.269 | 5.59E-05  |
| 1428563_at   | Ddx10   | DEAD (Asp-Glu-Ala-Asp) box polypeptide 10                     | 0.269 | 0.0025188 |
| 1416142_at   | Rps6    | ribosomal protein S6                                          | 0.269 | 3.21E-05  |
| 1433721_x_at | Rps21   | ribosomal protein S21                                         | 0.269 | 1.91E-05  |
| 1449323_a_at | Rpl3    | ribosomal protein L3                                          | 0.270 | 1.66E-05  |
| 1454636_at   | Cbx5    | chromobox homolog 5 (Drosophila HP1a)                         | 0.270 | 4.34E-05  |
| 1436979_x_at | Rbm14   | RNA binding motif protein 14                                  | 0.270 | 9.93E-05  |
| 1423298_at   | Add3    | adducin 3 (gamma)                                             | 0.271 | 2.48E-05  |
| 1448484_at   | Amd1    | S-adenosylmethionine decarboxylase 1                          | 0.271 | 5.78E-05  |
| 1438239_at   | Mid1    | midline 1                                                     | 0.271 | 1.65E-05  |
| 1417125_at   | Ahcy    | S-adenosylhomocysteine hydrolase                              | 0.272 | 0.0002444 |
| 1435753_a_at | Nucks1  | nuclear casein kinase and cyclin-dependent kinase substrate 1 | 0.272 | 2.47E-05  |
| 1429058_at   | Tmem107 | transmembrane protein 107                                     | 0.272 | 7.63E-05  |
| 1455892_x_at | NA      | NA                                                            | 0.273 | 0.0001288 |
| 1422478_a_at | Acss2   | acyl-CoA synthetase short-chain family member 2               | 0.273 | 0.0003682 |

|                |          |                                                                   |       |           |
|----------------|----------|-------------------------------------------------------------------|-------|-----------|
| 1422814_at     | Aspm     | asp (abnormal spindle)-like, microcephaly associated (Drosophila) | 0.273 | 5.37E-05  |
| 1428546_at     | Syncrip  | synaptotagmin binding, cytoplasmic RNA interacting protein        | 0.274 | 3.58E-05  |
| 1456531_x_at   | Prpf19   | PRP19/PSO4 pre-mRNA processing factor 19 homolog (S. cerevisiae)  | 0.275 | 5.10E-05  |
| 1417762_a_at   | Rpl8     | ribosomal protein L8                                              | 0.276 | 4.68E-05  |
| AFFX-ThrX-5_at | NA       | NA                                                                | 0.276 | 0.0129397 |
| 1452210_at     | Dna2     | DNA replication helicase 2 homolog (yeast)                        | 0.276 | 9.70E-05  |
| 1423775_s_at   | Prc1     | protein regulator of cytokinesis 1                                | 0.276 | 0.0002442 |
| 1435122_x_at   | Dnmt1    | DNA methyltransferase (cytosine-5) 1                              | 0.276 | 0.0002443 |
| 1460247_a_at   | Skp2     | S-phase kinase-associated protein 2 (p45)                         | 0.277 | 0.0008395 |
| 1448217_a_at   | Rpl27    | ribosomal protein L27                                             | 0.277 | 2.61E-05  |
| 1456628_x_at   | Rps24    | ribosomal protein S24                                             | 0.278 | 3.40E-05  |
| 1448178_a_at   | Cct3     | chaperonin containing Tcp1, subunit 3 (gamma)                     | 0.278 | 2.54E-05  |
| 1434109_at     | Sh3bgrl2 | SH3 domain binding glutamic acid-rich protein like 2              | 0.278 | 5.32E-05  |

|              |              |                                                                         |       |           |
|--------------|--------------|-------------------------------------------------------------------------|-------|-----------|
| 1433543_at   | Anln         | anillin, actin binding protein                                          | 0.279 | 0.0015426 |
| 1454842_a_at | B3galnt2     | UDP-GalNAc:betaGlcNAc beta 1,3-galactosaminyltransferase, polypeptide 2 | 0.279 | 0.0003609 |
| 1453362_x_at | Rps24        | ribosomal protein S24                                                   | 0.279 | 0.0001061 |
| 1420028_s_at | Mcm3         | minichromosome maintenance deficient 3 (S. cerevisiae)                  | 0.279 | 0.0001903 |
| 1456373_x_at | Rps20        | ribosomal protein S20                                                   | 0.279 | 4.24E-05  |
| 1419736_a_at | Eif1ay       | eukaryotic translation initiation factor 1A, Y-linked                   | 0.280 | 2.79E-05  |
| 1439270_x_at | LOC100045999 | similar to RAN, member RAS oncogene family                              | 0.280 | 3.08E-05  |
| 1422844_a_at | Wdr77        | WD repeat domain 77                                                     | 0.280 | 0.0001626 |
| 1437424_at   | Syde2        | synapse defective 1, Rho GTPase, homolog 2 (C. elegans)                 | 0.281 | 0.0002337 |
| 1419291_x_at | Gas5         | growth arrest specific 5                                                | 0.281 | 2.22E-05  |
| 1428672_at   | Snrpf        | small nuclear ribonucleoprotein polypeptide F                           | 0.281 | 0.0006119 |
| 1429171_a_at | Ncapg        | on-SMC condensin I complex, subunit G                                   | 0.281 | 0.0002236 |
| 1416664_at   | Cdc20        | cell division cycle 20 homolog (S. cerevisiae)                          | 0.282 | 0.000196  |
| 1451122_at   | Idi1         | isopentenyl-diphosphate delta isomerase                                 | 0.282 | 0.0001454 |

|                       |              |                                                                                                   |       |           |
|-----------------------|--------------|---------------------------------------------------------------------------------------------------|-------|-----------|
| 1433569_x_at          | LOC100045999 | similar to RAN, member RAS oncogene family                                                        | 0.282 | 2.24E-05  |
| 1424048_a_at          | Cyb5r1       | cytochrome b5 reductase 1                                                                         | 0.283 | 0.000217  |
| 1436363_a_at          | Nfix         | nuclear factor I/X                                                                                | 0.283 | 4.80E-05  |
| 1416721_s_at          | Sfrs6        | splicing factor, arginine/serine-rich 6                                                           | 0.283 | 6.71E-05  |
| 1438168_x_at          | Ddx39        | DEAD (Asp-Glu-Ala-Asp) box polypeptide 39                                                         | 0.284 | 2.69E-05  |
| 1435103_x_at          | Farsb        | phenylalanyl-tRNA synthetase, beta subunit                                                        | 0.284 | 0.0001108 |
| 1438320_s_at          | Mcm7         | minichromosome maintenance deficient 7 (S. cerevisiae)                                            | 0.284 | 2.60E-05  |
| AFFX-r2-Bs-thr-5_s_at | NA           | NA                                                                                                | 0.284 | 0.0119733 |
| 1438784_at            | Bcl11b       | B-cell leukemia/lymphoma 11B                                                                      | 0.284 | 0.0028027 |
| 1424883_s_at          | Sfrs7        | splicing factor, arginine/serine-rich 7                                                           | 0.285 | 4.43E-05  |
| 1456227_x_at          | Rbbp7        | retinoblastoma binding protein 7                                                                  | 0.285 | 4.60E-05  |
| 1423416_at            | Smarcc1      | SWI/SNF related, matrix associated, actin dependent regulator of chromatin, subfamily c, member 1 | 0.286 | 0.0002565 |

|              |              |                                                                  |       |           |
|--------------|--------------|------------------------------------------------------------------|-------|-----------|
| 1417364_at   | Eef1g        | eukaryotic translation elongation factor 1 gamma                 | 0.286 | 7.29E-05  |
| 1456436_x_at | Rps20        | ribosomal protein S20                                            | 0.286 | 5.00E-05  |
| 1423847_at   | Ncapd2       | non-SMC condensin I complex, subunit D2                          | 0.286 | 0.0001523 |
| 1438649_x_at | Pebp1        | phosphatidylethanolamine binding protein 1                       | 0.287 | 9.78E-05  |
| 1448921_a_at | Mrps9        | mitochondrial ribosomal protein S9                               | 0.287 | 2.50E-05  |
| 1435227_at   | Bcl11b       | B-cell leukemia/lymphoma 11B                                     | 0.288 | 0.0004817 |
| 1420592_a_at | Anp32e       | acidic (leucine-rich) nuclear phosphoprotein 32 family, member E | 0.288 | 4.32E-05  |
| 1423566_a_at | Hsph1        | heat shock 105kDa/110kDa protein 1                               | 0.288 | 0.0007498 |
| 1456521_at   | NA           | NA                                                               | 0.288 | 0.0002946 |
| 1448229_s_at | Ccnd2        | cyclin D2                                                        | 0.288 | 0.0017105 |
| 1436040_at   | LOC100039864 | hypothetical protein LOC100039864                                | 0.288 | 8.77E-05  |
| 1416167_at   | Prdx4        | peroxiredoxin 4                                                  | 0.289 | 0.0023634 |
| 1435712_a_at | LOC100042388 | similar to ribosomal protein S18                                 | 0.289 | 2.42E-05  |
| 1454837_at   | Cln6         | ceroid-lipofuscinosis, neuronal 6                                | 0.289 | 0.0006682 |
| 1427797_s_at | NA           | NA                                                               | 0.290 | 0.0003523 |
| 1433519_at   | Nucks1       | nuclear casein kinase and cyclin-dependent kinase substrate 1    | 0.290 | 6.37E-05  |

|              |         |                                                                                |       |           |
|--------------|---------|--------------------------------------------------------------------------------|-------|-----------|
| 1454992_at   | Slc7a1  | solute carrier family 7 (cationic amino acid transporter, y+ system), member 1 | 0.290 | 4.02E-05  |
| 1441466_at   | Sfrs10  | splicing factor, arginine/serine-rich 10 (transformer 2 homolog, Drosophila)   | 0.290 | 0.001349  |
| 1433933_s_at | Slco2b1 | solute carrier organic anion transporter family, member 2b1                    | 0.290 | 0.0022836 |
| 1419741_at   | Supt16h | suppressor of Ty 16 homolog (S. cerevisiae)                                    | 0.291 | 5.26E-05  |
| 1455570_x_at | Cnn3    | calponin 3, acidic                                                             | 0.292 | 7.04E-05  |
| 1438794_x_at | Rps13   | ribosomal protein S13                                                          | 0.293 | 3.16E-05  |
| 1456865_x_at | Rrs1    | RRS1 ribosome biogenesis regulator homolog (S. cerevisiae)                     | 0.293 | 7.15E-05  |
| 1426793_a_at | Rpl14   | ribosomal protein L14                                                          | 0.293 | 0.0001393 |
| 1415822_at   | Scd2    | stearoyl-Coenzyme A desaturase 2                                               | 0.293 | 0.0002551 |
| 1449196_a_at | Rps27a  | ribosomal protein S27a                                                         | 0.294 | 2.79E-05  |
| 1455814_x_at | Ddx39   | DEAD (Asp-Glu-Ala-Asp) box polypeptide 39                                      | 0.294 | 2.64E-05  |
| 1437008_x_at | Tmem109 | transmembrane protein 109                                                      | 0.294 | 7.46E-05  |
| 1416135_at   | Apex1   | apurinic/apyrimidinic endonuclease 1                                           | 0.294 | 3.16E-05  |

|              |              |                                                              |       |           |
|--------------|--------------|--------------------------------------------------------------|-------|-----------|
| 1458685_at   | Garnl1       | GTPase activating RANGAP domain-like 1                       | 0.294 | 0.0169986 |
| 1432416_a_at | Npm1         | nucleophosmin 1                                              | 0.294 | 9.97E-05  |
| 1416519_at   | Rpl36        | ribosomal protein L36                                        | 0.294 | 2.83E-05  |
| 1455966_s_at | Nudt21       | nudix (nucleoside diphosphate linked moiety X)-type motif 21 | 0.294 | 0.0004472 |
| 1418152_at   | Nsbp1        | nucleosome binding protein 1                                 | 0.295 | 5.62E-05  |
| 1449116_a_at | Dtymk        | deoxythymidylate kinase                                      | 0.295 | 0.0002535 |
| 1453118_s_at | Rpl22        | ribosomal protein L22                                        | 0.295 | 4.33E-05  |
| 1438630_x_at | Mat2a        | methionine adenosyltransferase II, alpha                     | 0.295 | 7.15E-05  |
| 1446339_at   | NA           | NA                                                           | 0.295 | 0.0022211 |
| 1430271_x_at | Josd3        | Josephin domain containing 3                                 | 0.295 | 0.0001122 |
| 1452172_at   | Fastkd2      | FAST kinase domains 2                                        | 0.296 | 0.0011877 |
| 1422557_s_at | Mt1          | metallothionein 1                                            | 0.296 | 0.0001911 |
| 1425048_a_at | Hmgb1        | high mobility group box 1                                    | 0.296 | 5.86E-05  |
| 1417065_at   | Egr1         | early growth response 1                                      | 0.297 | 3.32E-05  |
| 1424300_at   | Gemin6       | gem (nuclear organelle) associated protein 6                 | 0.297 | 0.0003888 |
| 1437454_a_at | Txndc14      | thioredoxin domain containing 14                             | 0.297 | 0.0001799 |
| 1451169_at   | Nomo1        | nodal modulator 1                                            | 0.297 | 0.0128819 |
| 1416363_at   | LOC100048743 | similar to FK506 binding protein 4                           | 0.297 | 0.0005575 |
| 1450920_at   | Ccnb2        | cyclin B2                                                    | 0.298 | 0.0002415 |

|              |                   |                                                                                                                                     |       |           |
|--------------|-------------------|-------------------------------------------------------------------------------------------------------------------------------------|-------|-----------|
| 1426946_at   | lpo5              | importin 5                                                                                                                          | 0.298 | 4.86E-05  |
| 1454834_at   | Nfib              | nuclear factor I/B                                                                                                                  | 0.298 | 0.0004656 |
| 1451649_a_at | Wdr75             | WD repeat domain 75                                                                                                                 | 0.298 | 0.0018159 |
| 1434367_s_at | ENSMUSG0000071497 | predicted gene, ENSMUSG0000071497                                                                                                   | 0.298 | 6.88E-05  |
| 1433575_at   | Sox4              | SRY-box containing gene 4                                                                                                           | 0.298 | 0.0001982 |
| 1438977_x_at | Ran               | RAN, member RAS oncogene family                                                                                                     | 0.299 | 2.80E-05  |
| 1416141_a_at | Rps6              | ribosomal protein S6                                                                                                                | 0.299 | 6.12E-05  |
| 1446928_at   | Dnajc17           | DnaJ (Hsp40) homolog, subfamily C, member 17                                                                                        | 0.299 | 0.0010454 |
| 1427997_at   | 1110007M04 Rik    | RIKEN cDNA 1110007M04 gene                                                                                                          | 0.300 | 9.89E-05  |
| 1415916_a_at | Mthfd1            | methylenetetrahydrofolate dehydrogenase (NADP+ dependent), methenyltetrahydrofolate cyclohydrolase, formyltetrahydrofolate synthase | 0.300 | 4.59E-05  |
| 1416345_at   | Timm8a1           | translocase of inner mitochondrial membrane 8 homolog a1 (yeast)                                                                    | 0.300 | 0.0006328 |
| 1417985_at   | Nrarp             | Notch-regulated ankyrin repeat protein                                                                                              | 0.300 | 0.0007876 |
| 1456497_x_at | Rps10             | ribosomal protein S10                                                                                                               | 0.300 | 4.25E-05  |



|              |                   |                                                              |       |           |
|--------------|-------------------|--------------------------------------------------------------|-------|-----------|
| 1416014_at   | Abce1             | ATP-binding cassette, sub-family E (OABP), member 1          | 0.300 | 0.0004762 |
| 1427174_at   | OTTMUSG0000016321 | predicted gene, OTTMUSG0000016321                            | 0.300 | 0.0015334 |
| 1442109_at   | NA                | NA                                                           | 0.300 | 0.0044736 |
| 1438655_a_at | Rpl34             | ribosomal protein L34                                        | 0.300 | 5.23E-05  |
| 1450986_at   | Nol5              | nucleolar protein 5                                          | 0.301 | 0.0007535 |
| 1436034_at   | Cep68             | centrosomal protein 68                                       | 0.301 | 0.0003151 |
| 1438986_x_at | Rps17             | ribosomal protein S17                                        | 0.301 | 7.36E-05  |
| 1416365_at   | Hsp90ab1          | heat shock protein 90kDa alpha (cytosolic), class B member 1 | 0.302 | 0.0004048 |
| 1434854_a_at | Rps10             | ribosomal protein S10                                        | 0.302 | 3.41E-05  |
| 1417460_at   | Ifitm2            | interferon induced transmembrane protein 2                   | 0.302 | 0.0001814 |
| 1438250_s_at | OTTMUSG0000006515 | predicted gene, OTTMUSG0000006515                            | 0.302 | 8.26E-05  |
| 1415889_a_at | Hsp90b1           | heat shock protein 90, beta (Grp94), member 1                | 0.302 | 4.81E-05  |
| 1451294_s_at | Snrpe             | small nuclear ribonucleoprotein E                            | 0.303 | 3.42E-05  |
| 1439421_x_at | Cbx3              | chromobox homolog 3 (Drosophila HP1 gamma)                   | 0.303 | 0.0010728 |
| 1436064_x_at | Rps24             | ribosomal protein S24                                        | 0.303 | 0.0002419 |
| 1433444_at   | LOC100040592      | similar to Hmgcs1 protein                                    | 0.303 | 0.0002085 |
| 1453096_x_at | Rpl27             | ribosomal protein L27                                        | 0.304 | 0.0001051 |

|              |                   |                                                                                          |       |           |
|--------------|-------------------|------------------------------------------------------------------------------------------|-------|-----------|
| 1455908_a_at | Scpep1            | serine<br>carboxypeptidase<br>1                                                          | 0.304 | 0.000259  |
| 1437033_a_at | Skp2              | S-phase kinase-<br>associated<br>protein 2 (p45)                                         | 0.305 | 0.0027164 |
| 1434377_x_at | Rps6              | ribosomal protein<br>S6                                                                  | 0.305 | 0.0001022 |
| 1422495_a_at | Hmgn1             | high mobility<br>group<br>nucleosomal<br>binding domain 1                                | 0.306 | 3.66E-05  |
| 1440584_at   | 9130221L21R<br>ik | RIKEN cDNA<br>9130221L21<br>gene                                                         | 0.306 | 0.0071695 |
| 1451065_a_at | Ddx39             | DEAD (Asp-Glu-<br>Ala-Asp) box<br>polypeptide 39                                         | 0.307 | 8.05E-05  |
| 1455168_a_at | Gnb2l1            | guanine<br>nucleotide<br>binding protein (G<br>protein), beta<br>polypeptide 2 like<br>1 | 0.307 | 7.18E-05  |
| 1438009_at   | Hist1h2ae         | histone cluster 1,<br>H2ae                                                               | 0.307 | 0.0001054 |
| 1448441_at   | Cks1b             | CDC28 protein<br>kinase 1b                                                               | 0.307 | 0.0006006 |
| 1437510_x_at | Rps17             | ribosomal protein<br>S17                                                                 | 0.307 | 5.97E-05  |
| 1418982_at   | Cebpa             | CCAAT/enhancer<br>binding protein<br>(C/EBP), alpha                                      | 0.307 | 0.0001981 |
| 1439268_x_at | Eif3e             | eukaryotic<br>translation<br>initiation factor 3,<br>subunit E                           | 0.307 | 0.0001054 |
| 1428390_at   | Wdr43             | WD repeat<br>domain 43                                                                   | 0.307 | 0.0019226 |
| 1455662_x_at | Rps17             | ribosomal protein<br>S17                                                                 | 0.307 | 7.43E-05  |

|              |                   |                                                                                     |       |           |
|--------------|-------------------|-------------------------------------------------------------------------------------|-------|-----------|
| 1422801_at   | G3bp1             | Ras-GTPase-activating protein SH3-domain binding protein 1                          | 0.308 | 0.0001021 |
| 1427202_at   | 4833442J19Rik     | RIKEN cDNA 4833442J19 gene                                                          | 0.308 | 0.0002312 |
| 1423455_at   | ENSMUSG0000068659 | predicted gene, ENSMUSG0000068659                                                   | 0.308 | 0.00063   |
| 1428506_at   | Atic              | 5-aminoimidazole-4-carboxamide ribonucleotide formyltransferase /IMP cyclohydrolase | 0.308 | 0.0006281 |
| 1455693_x_at | LOC100043734      | similar to ribosomal protein S6                                                     | 0.308 | 0.0001862 |
| 1455496_at   | Pfas              | phosphoribosylformylglycinamide synthase (FGAR amidotransferase)                    | 0.309 | 0.0002997 |
| 1427439_s_at | Prmt5             | protein arginine N-methyltransferase 5                                              | 0.309 | 5.96E-05  |
| 1434120_a_at | Metap2            | methionine aminopeptidase 2                                                         | 0.309 | 0.0001288 |
| 1436549_a_at | Hnrnpa1           | heterogeneous nuclear ribonucleoprotein A1                                          | 0.309 | 6.34E-05  |
| 1435816_at   | Rps6              | ribosomal protein S6                                                                | 0.310 | 0.0003372 |
| 1454859_a_at | Rpl23             | ribosomal protein L23                                                               | 0.310 | 0.0001496 |
| 1451920_a_at | Rfc1              | replication factor C (activator 1) 1                                                | 0.311 | 0.0079443 |
| 1436699_x_at | LOC100048449      | similar to ribosomal protein L18                                                    | 0.311 | 4.58E-05  |

|              |                   |                                                                               |       |           |
|--------------|-------------------|-------------------------------------------------------------------------------|-------|-----------|
| 1419510_at   | Es22              | esterase 22                                                                   | 0.311 | 0.0014675 |
| 1438776_x_at | 100040123         | predicted gene,<br>100040123                                                  | 0.311 | 7.16E-05  |
| 1457915_at   | 4833442J19Ri<br>k | RIKEN cDNA<br>4833442J19<br>gene                                              | 0.311 | 0.0005482 |
| 1417082_at   | Anp32b            | acidic (leucine-<br>rich) nuclear<br>phosphoprotein<br>32 family,<br>member B | 0.311 | 0.0001207 |
| 1427169_at   | Pard3b            | par-3 partitioning<br>defective 3<br>homolog B (C.<br>elegans)                | 0.312 | 0.0112424 |
| 1426609_at   | Dis3              | DIS3 mitotic<br>control homolog<br>(S. cerevisiae)                            | 0.312 | 0.0003173 |
| 1447166_at   | NA                | NA                                                                            | 0.314 | 0.0061477 |
| 1416661_at   | Eif3a             | eukaryotic<br>translation<br>initiation factor 3,<br>subunit A                | 0.314 | 0.018949  |
| 1425557_x_at | Tsc22d3           | TSC22 domain<br>family, member 3                                              | 0.314 | 0.0004308 |
| 1447853_x_at | Kif13a            | kinesin family<br>member 13A                                                  | 0.314 | 0.003441  |
| 1427094_at   | Pole2             | polymerase (DNA<br>directed), epsilon<br>2 (p59 subunit)                      | 0.315 | 0.0023066 |
| 1416452_at   | Oat               | ornithine<br>aminotransferase                                                 | 0.315 | 0.0012591 |
| 1435593_x_at | Rps7              | ribosomal protein<br>S7                                                       | 0.315 | 6.61E-05  |
| 1447864_s_at | Pogk              | pogo<br>transposable<br>element with<br>KRAB domain                           | 0.315 | 0.0016296 |
| 1439266_a_at | Polr3k            | polymerase<br>(RNA) III (DNA<br>directed)<br>polypeptide K                    | 0.315 | 0.0002058 |

|                       |                   |                                                                                               |       |           |
|-----------------------|-------------------|-----------------------------------------------------------------------------------------------|-------|-----------|
| 1438631_x_at          | Ttc13             | tetratricopeptide repeat domain 13                                                            | 0.316 | 0.0001489 |
| 1427369_at            | Nlrp6             | NLR family, pyrin domain containing 6                                                         | 0.316 | 0.0007834 |
| 1416605_at            | Nola2             | nucleolar protein family A, member 2                                                          | 0.316 | 5.50E-05  |
| 1455855_x_at          | Agxt2l2           | alanine-glyoxylate aminotransferase 2-like 2                                                  | 0.316 | 7.07E-05  |
| 1428823_at            | Hddc2             | HD domain containing 2                                                                        | 0.316 | 0.0009392 |
| 1436640_x_at          | Agpat4            | 1-acylglycerol-3-phosphate O-acyltransferase 4 (lysophosphatidic acid acyltransferase, delta) | 0.317 | 0.0005182 |
| 1418656_at            | Lsm5              | LSM5 homolog, U6 small nuclear RNA associated ( <i>S. cerevisiae</i> )                        | 0.317 | 6.63E-05  |
| 1453053_at            | 2610036L11Rik     | RIKEN cDNA 2610036L11 gene                                                                    | 0.317 | 0.0004753 |
| 1424244_at            | Rwdd4a            | RWD domain containing 4A                                                                      | 0.317 | 0.0004341 |
| 1418222_at            | 2610024G14Rik     | RIKEN cDNA 2610024G14 gene                                                                    | 0.317 | 0.0016246 |
| AFFX-r2-Bs-thr-M_s_at | NA                | NA                                                                                            | 0.317 | 0.0153297 |
| 1426612_at            | Tipin             | timeless interacting protein                                                                  | 0.318 | 0.0005452 |
| 1430574_at            | Cdkn3             | cyclin-dependent kinase inhibitor 3                                                           | 0.318 | 4.63E-05  |
| 1416118_at            | Trim59            | tripartite motif-containing 59                                                                | 0.319 | 0.0008789 |
| 1454627_a_at          | ENSMUSG0000074516 | predicted gene, ENSMUSG0000074516                                                             | 0.319 | 5.36E-05  |

|              |                   |                                                        |       |           |
|--------------|-------------------|--------------------------------------------------------|-------|-----------|
| 1428530_x_at | Rps24             | ribosomal protein S24                                  | 0.319 | 6.27E-05  |
| 1416026_a_at | Rpl12             | ribosomal protein L12                                  | 0.320 | 5.02E-05  |
| 1436194_at   | Prelid2           | PRELI domain containing 2                              | 0.320 | 0.0001201 |
| 1434578_x_at | LOC100045999      | similar to RAN, member RAS oncogene family             | 0.320 | 6.43E-05  |
| 1444709_at   | Invs              | inversin                                               | 0.320 | 0.0108927 |
| 1438291_x_at | OTTMUSG0000009529 | predicted gene, OTTMUSG0000009529                      | 0.321 | 7.27E-05  |
| 1431765_a_at | Rps2              | ribosomal protein S2                                   | 0.321 | 0.0001374 |
| 1456194_a_at | Park7             | Parkinson disease (autosomal recessive, early onset) 7 | 0.321 | 7.90E-05  |
| 1434523_x_at | Eif3e             | eukaryotic translation initiation factor 3, subunit E  | 0.321 | 0.0001455 |
| 1449001_at   | Ivd               | isovaleryl coenzyme A dehydrogenase                    | 0.321 | 0.0005808 |
| 1453001_at   | Rnaseh2b          | ribonuclease H2, subunit B                             | 0.321 | 0.0021864 |
| 1451101_a_at | Rps28             | ribosomal protein S28                                  | 0.321 | 7.74E-05  |
| 1454778_x_at | Rps28             | ribosomal protein S28                                  | 0.322 | 6.88E-05  |
| 1428410_at   | Nat13             | N-acetyltransferase 13                                 | 0.323 | 0.001973  |
| 1452681_at   | Dtymk             | deoxythymidylate kinase                                | 0.323 | 0.0007233 |
| 1459986_a_at | Rps17             | ribosomal protein S17                                  | 0.323 | 8.01E-05  |
| 1437729_at   | Rpl27a            | ribosomal protein L27a                                 | 0.324 | 0.0001487 |
| 1419397_at   | Pola1             | polymerase (DNA directed), alpha 1                     | 0.324 | 0.0009687 |

|              |        |                                                                      |       |           |
|--------------|--------|----------------------------------------------------------------------|-------|-----------|
| 1417317_s_at | Rpl35a | ribosomal protein L35a                                               | 0.324 | 7.45E-05  |
| 1419270_a_at | Dut    | deoxyuridine triphosphatase                                          | 0.324 | 6.85E-05  |
| 1427682_a_at | Egr2   | early growth response 2                                              | 0.325 | 0.0324823 |
| 1416925_at   | Kpnb1  | karyopherin (importin) beta 1                                        | 0.325 | 0.0006221 |
| 1416309_at   | Nusap1 | nucleolar and spindle associated protein 1                           | 0.325 | 0.0005567 |
| 1416998_at   | Rrs1   | RRS1 ribosome biogenesis regulator homolog (S. cerevisiae)           | 0.326 | 0.0002347 |
| 1457730_at   | Fancm  | Fanconi anemia, complementation group M                              | 0.326 | 0.0027717 |
| 1434942_at   | Esf1   | ESF1, nucleolar pre-rRNA processing protein, homolog (S. cerevisiae) | 0.326 | 0.0014101 |
| 1435817_x_at | Rps6   | ribosomal protein S6                                                 | 0.326 | 9.21E-05  |
| 1427539_a_at | Zwint  | ZW10 interactor                                                      | 0.327 | 0.0003248 |
| 1416074_a_at | Rpl28  | ribosomal protein L28                                                | 0.327 | 9.71E-05  |
| 1422859_a_at | Rpl23  | ribosomal protein L23                                                | 0.327 | 0.0003692 |
| 1422441_x_at | Cdk4   | cyclin-dependent kinase 4                                            | 0.328 | 9.90E-05  |
| 1438244_at   | Nfib   | nuclear factor I/B                                                   | 0.328 | 0.0012953 |
| 1435873_a_at | Rpl13a | ribosomal protein L13a                                               | 0.328 | 0.0006192 |
| 1423060_at   | Pa2g4  | proliferation-associated 2G4                                         | 0.328 | 0.0007412 |
| 1417097_at   | Mecr   | mitochondrial trans-2-enoyl-CoA reductase                            | 0.328 | 0.0022271 |

|              |           |                                                                |       |           |
|--------------|-----------|----------------------------------------------------------------|-------|-----------|
| 1420365_a_at | Hnrnpa2b1 | heterogeneous nuclear ribonucleoprotein A2/B1                  | 0.328 | 6.64E-05  |
| 1436708_x_at | Mcm4      | minichromosome maintenance deficient 4 homolog (S. cerevisiae) | 0.329 | 0.0004951 |
| 1415761_at   | Mrpl52    | mitochondrial ribosomal protein L52                            | 0.329 | 0.0001585 |
| 1438095_x_at | Noc4l     | nucleolar complex associated 4 homolog (S. cerevisiae)         | 0.329 | 0.0003922 |
| 1452787_a_at | Prmt1     | protein arginine N-methyltransferase 1                         | 0.329 | 0.0001032 |
| 1455790_at   | E2f2      | E2F transcription factor 2                                     | 0.329 | 6.01E-05  |
| 1419700_a_at | Prom1     | prominin 1                                                     | 0.329 | 0.0001564 |
| 1437976_x_at | Rpl23a    | ribosomal protein L23a                                         | 0.329 | 5.60E-05  |
| 1434158_at   | Gmcs      | GDP-mannose 4, 6-dehydratase                                   | 0.329 | 0.0017356 |
| 1424001_at   | Mki67ip   | Mki67 (FHA domain) interacting nucleolar phosphoprotein        | 0.329 | 0.0005481 |
| 1419364_a_at | Rps7      | ribosomal protein S7                                           | 0.330 | 5.88E-05  |
| 1423233_at   | Cebpd     | CCAAT/enhancer binding protein (C/EBP), delta                  | 0.330 | 0.0001427 |
| 1437993_x_at | Qdpr      | quinoid dihydropteridine reductase                             | 0.330 | 0.000263  |
| 1428412_at   | Tm9sf3    | transmembrane 9 superfamily member 3                           | 0.330 | 7.57E-05  |



|              |          |                                                              |       |           |
|--------------|----------|--------------------------------------------------------------|-------|-----------|
| 1437497_a_at | Hsp90aa1 | heat shock protein 90, alpha (cytosolic), class A member 1   | 0.330 | 0.0021603 |
| 1418565_at   | Serbp1   | Serpine1 mRNA binding protein 1                              | 0.330 | 0.0004683 |
| 1442178_at   | NA       | NA                                                           | 0.330 | 0.0023229 |
| 1439553_s_at | Nutf2    | nuclear transport factor 2                                   | 0.330 | 6.82E-05  |
| 1418543_s_at | Ccdc43   | coiled-coil domain containing 43                             | 0.331 | 0.0009164 |
| 1423709_s_at | Farsb    | phenylalanyl-tRNA synthetase, beta subunit                   | 0.331 | 0.0004905 |
| 1428798_s_at | Setd6    | SET domain containing 6                                      | 0.331 | 0.0093164 |
| 1447905_x_at | Nup62    | nucleoporin 62                                               | 0.332 | 0.0001079 |
| 1416150_a_at | Sfrs3    | splicing factor, arginine/serine-rich 3 (SRp20)              | 0.333 | 6.39E-05  |
| 1423667_at   | Mat2a    | methionine adenosyltransferase II, alpha                     | 0.333 | 0.0002685 |
| 1418255_s_at | Srf      | serum response factor                                        | 0.333 | 0.0006855 |
| 1448820_a_at | Eif2s2   | eukaryotic translation initiation factor 2, subunit 2 (beta) | 0.333 | 0.001479  |
| 1417470_at   | Apobec3  | apolipoprotein B editing complex 3                           | 0.333 | 0.000256  |
| 1435630_s_at | Acat2    | acetyl-Coenzyme A acetyltransferase 2                        | 0.334 | 0.0001695 |
| 1455485_x_at | Rpl13a   | ribosomal protein L13a                                       | 0.334 | 0.0003674 |

|              |                   |                                                   |       |           |
|--------------|-------------------|---------------------------------------------------|-------|-----------|
| 1435733_x_at | Rnaseh2c          | ribonuclease H2, subunit C                        | 0.334 | 0.0006647 |
| 1434437_x_at | Rrm2              | ribonucleotide reductase M2                       | 0.335 | 0.000588  |
| 1451980_at   | Casd1             | CAS1 domain containing 1                          | 0.335 | 0.0004126 |
| 1450048_a_at | ldh2              | isocitrate dehydrogenase 2 (NADP+), mitochondrial | 0.335 | 0.0002125 |
| 1456566_x_at | Rbm14             | RNA binding motif protein 14                      | 0.335 | 0.0001653 |
| 1438723_a_at | Rps10             | ribosomal protein S10                             | 0.336 | 7.19E-05  |
| 1445684_s_at | Hdac2             | histone deacetylase 2                             | 0.336 | 9.57E-05  |
| 1427803_at   | NA                | NA                                                | 0.336 | 0.0065791 |
| 1425183_a_at | Rpl4              | ribosomal protein L4                              | 0.337 | 7.53E-05  |
| 1459978_x_at | Ccnjl             | cyclin J-like                                     | 0.337 | 0.0005626 |
| 1452669_at   | 2810012G03<br>Rik | RIKEN cDNA 2810012G03 gene                        | 0.337 | 0.0013176 |
| 1457257_x_at | NA                | NA                                                | 0.338 | 0.0008899 |
| 1431177_a_at | OTTMUSG0000022086 | predicted gene, OTTMUSG0000022086                 | 0.338 | 8.55E-05  |
| 1437131_x_at | Mrpl11            | mitochondrial ribosomal protein L11               | 0.338 | 0.0015735 |
| 1422475_a_at | Rps3a             | ribosomal protein S3a                             | 0.338 | 8.08E-05  |
| 1415878_at   | Rrm1              | ribonucleotide reductase M1                       | 0.339 | 8.57E-05  |
| 1452917_at   | Rfc5              | replication factor C (activator 1) 5              | 0.339 | 0.0007954 |
| 1441547_at   | NA                | NA                                                | 0.339 | 0.0033075 |
| 1426897_at   | Rcc2              | regulator of chromosome condensation 2            | 0.339 | 0.000711  |
| 1418503_at   | Hspa9             | heat shock protein 9                              | 0.340 | 0.0003265 |

|              |               |                                                        |       |           |
|--------------|---------------|--------------------------------------------------------|-------|-----------|
| 1450100_a_at | Tcerg1        | transcription elongation regulator 1 (CA150)           | 0.340 | 0.0026054 |
| 1418901_at   | Cebpb         | CCAAT/enhancer binding protein (C/EBP), beta           | 0.340 | 0.0001771 |
| 1456102_a_at | Cul5          | cullin 5                                               | 0.340 | 0.0051809 |
| 1430183_at   | 4833414E09Rik | RIKEN cDNA 4833414E09 gene                             | 0.341 | 0.0035967 |
| 1460354_a_at | Mrpl13        | mitochondrial ribosomal protein L13                    | 0.341 | 0.0001616 |
| 1426854_a_at | LOC100047898  | similar to protein phosphatase 2A inhibitor-2 I-2PP2A  | 0.341 | 0.0001381 |
| 1435966_x_at | Mrpl13        | mitochondrial ribosomal protein L13                    | 0.341 | 0.0002195 |
| 1419441_at   | Rplp0         | ribosomal protein, large, P0                           | 0.341 | 0.0002201 |
| 1451532_s_at | Steap1        | six transmembrane epithelial antigen of the prostate 1 | 0.341 | 0.0006778 |
| 1434700_at   | 6030408C04Rik | RIKEN cDNA 6030408C04 gene                             | 0.341 | 0.0026828 |
| 1460201_a_at | Rpl24         | ribosomal protein L24                                  | 0.341 | 9.85E-05  |
| 1416757_at   | Zwilch        | Zwilch, kinetochore associated, homolog (Drosophila)   | 0.342 | 0.0023112 |
| 1443843_x_at | NA            | NA                                                     | 0.342 | 0.0003629 |
| 1459987_s_at | Cct3          | chaperonin containing Tcp1, subunit 3 (gamma)          | 0.342 | 0.0008949 |
| 1435151_a_at | Rps3          | ribosomal protein S3                                   | 0.342 | 0.0001194 |
| 1448358_s_at | Snrpg         | small nuclear ribonucleoprotein polypeptide G          | 0.342 | 0.0001086 |

|              |        |                                                        |       |           |
|--------------|--------|--------------------------------------------------------|-------|-----------|
| 1452680_at   | Snrpd2 | small nuclear ribonucleoprotein D2                     | 0.342 | 7.04E-05  |
| 1424436_at   | Gart   | phosphoribosylglycinamide formyltransferase            | 0.342 | 0.0009094 |
| 1456960_at   | NA     | NA                                                     | 0.343 | 0.0075049 |
| 1438505_s_at | Rnasen | ribonuclease III, nuclear                              | 0.343 | 0.0005386 |
| 1416151_at   | Sfrs3  | splicing factor, arginine/serine-rich 3 (SRp20)        | 0.343 | 0.0006827 |
| 1448739_x_at | Rps18  | ribosomal protein S18                                  | 0.344 | 8.05E-05  |
| 1435046_at   | NA     | NA                                                     | 0.344 | 0.0016068 |
| 1454904_at   | Mtm1   | X-linked myotubular myopathy gene 1                    | 0.344 | 0.000303  |
| 1418034_at   | Mrps9  | mitochondrial ribosomal protein S9                     | 0.344 | 0.000517  |
| 1439269_x_at | Mcm7   | minichromosome maintenance deficient 7 (S. cerevisiae) | 0.344 | 0.0009363 |
| 1451144_at   | Bxdc2  | brix domain containing 2                               | 0.344 | 0.0002979 |
| 1436856_x_at | Tars2  | threonyl-tRNA synthetase 2, mitochondrial (putative)   | 0.344 | 8.97E-05  |
| 1416106_at   | Kti12  | KTI12 homolog, chromatin associated (S. cerevisiae)    | 0.344 | 0.0001286 |
| 1416243_a_at | Rpl35  | ribosomal protein L35                                  | 0.344 | 8.46E-05  |
| 1428869_at   | Nolc1  | nucleolar and coiled-body phosphoprotein 1             | 0.344 | 0.0001747 |
| 1435372_a_at | Pa2g4  | proliferation-associated 2G4                           | 0.345 | 0.0002386 |
| 1427464_s_at | Hspa5  | heat shock protein 5                                   | 0.345 | 0.0002561 |

|              |                   |                                                             |       |           |
|--------------|-------------------|-------------------------------------------------------------|-------|-----------|
| 1426661_at   | Rpl27a            | ribosomal protein L27a                                      | 0.346 | 7.51E-05  |
| 1447585_s_at | Slc5a3            | solute carrier family 5 (inositol transporters), member 3   | 0.346 | 8.92E-05  |
| 1437085_at   | D630039A03<br>Rik | RIKEN cDNA D630039A03 gene                                  | 0.346 | 0.0008181 |
| 1444051_at   | 1700019D03R<br>ik | RIKEN cDNA 1700019D03 gene                                  | 0.346 | 0.0017966 |
| 1435875_at   | Prkab2            | protein kinase, AMP-activated, beta 2 non-catalytic subunit | 0.346 | 0.0016666 |
| 1448526_at   | Kpnb1             | karyopherin (importin) beta 1                               | 0.347 | 0.0001529 |
| 1447896_s_at | NA                | NA                                                          | 0.347 | 0.0004175 |
| 1423756_s_at | Igfbp4            | insulin-like growth factor binding protein 4                | 0.347 | 0.0009811 |
| 1456735_x_at | Acpl2             | acid phosphatase-like 2                                     | 0.347 | 0.0018074 |
| 1416336_s_at | Snrpd1            | small nuclear ribonucleoprotein D1                          | 0.348 | 0.0001199 |
| 1415839_a_at | Npm1              | nucleophosmin 1                                             | 0.348 | 0.000138  |
| 1429491_s_at | Rif1              | Rap1 interacting factor 1 homolog (yeast)                   | 0.348 | 0.0006527 |
| 1428099_a_at | Sfrs1             | splicing factor, arginine/serine-rich 1 (ASF/SF2)           | 0.348 | 0.0001972 |
| 1460008_x_at | Rpl31             | ribosomal protein L31                                       | 0.349 | 0.0001512 |
| 1416701_at   | Rnd3              | Rho family GTPase 3                                         | 0.350 | 0.0006542 |

|                |          |                                                                                                 |       |           |
|----------------|----------|-------------------------------------------------------------------------------------------------|-------|-----------|
| 1433789_at     | Snhg3    | small nucleolar RNA host gene (non-protein coding) 3                                            | 0.350 | 0.0001788 |
| AFFX-PheX-5_at | NA       | NA                                                                                              | 0.350 | 0.0228223 |
| 1434279_at     | NA       | NA                                                                                              | 0.350 | 0.0006821 |
| 1423271_at     | Gjb2     | gap junction protein, beta 2                                                                    | 0.350 | 0.0033497 |
| 1436995_a_at   | Rpl26    | ribosomal protein L26                                                                           | 0.350 | 0.0002724 |
| 1423763_x_at   | Rps28    | ribosomal protein S28                                                                           | 0.351 | 0.0001358 |
| 1453257_at     | Agpat5   | 1-acylglycerol-3-phosphate O-acyltransferase 5 (lysophosphatidic acid acyltransferase, epsilon) | 0.351 | 0.0011973 |
| 1437196_x_at   | Rps16    | ribosomal protein S16                                                                           | 0.351 | 0.0004173 |
| 1417351_a_at   | Snrpa1   | small nuclear ribonucleoprotein polypeptide A@#\$%&                                             | 0.351 | 0.0002762 |
| 1437336_x_at   | Prickle4 | prickle homolog 4 (Drosophila)                                                                  | 0.352 | 0.0005076 |
| 1451077_at     | Rpl5     | ribosomal protein L5                                                                            | 0.352 | 0.0003052 |
| 1434543_a_at   | BolA2    | bolA-like 2 (E. coli)                                                                           | 0.352 | 0.0001708 |
| 1426660_x_at   | Rpl23a   | ribosomal protein L23a                                                                          | 0.352 | 9.06E-05  |
| AFFX-ThrX-M_at | NA       | NA                                                                                              | 0.352 | 0.0196862 |
| 1433640_at     | Fubp1    | far upstream element (FUSE) binding protein 1                                                   | 0.352 | 0.0027067 |
| 1420525_a_at   | Otc      | ornithine transcarbamylase                                                                      | 0.353 | 0.0015098 |

|                     |                   |                                                            |       |           |
|---------------------|-------------------|------------------------------------------------------------|-------|-----------|
| 1436871_at          | Sfrs7             | splicing factor, arginine/serine-rich 7                    | 0.353 | 0.0006454 |
| 1435586_at          | Pcid2             | PCI domain containing 2                                    | 0.353 | 0.0041646 |
| 1452877_at          | 2700029M09<br>Rik | RIKEN cDNA 2700029M09 gene                                 | 0.353 | 0.0002058 |
| 1421546_a_at        | Racgap1           | Rac GTPase-activating protein 1                            | 0.353 | 0.0007429 |
| 1460680_a_at        | Rpl23             | ribosomal protein L23                                      | 0.353 | 8.83E-05  |
| 1449184_at          | Pglyrp1           | peptidoglycan recognition protein 1                        | 0.354 | 0.0235292 |
| AFFX-r2-Bs-phe-M_at | NA                | NA                                                         | 0.354 | 0.0181209 |
| 1435735_x_at        | H47               | histocompatibility 47                                      | 0.354 | 0.0001405 |
| 1430293_a_at        | Fdx1l             | ferredoxin 1-like                                          | 0.354 | 0.0023574 |
| 1416546_a_at        | Rpl6              | ribosomal protein L6                                       | 0.354 | 9.04E-05  |
| AFFX-LysX-5_at      | NA                | NA                                                         | 0.354 | 0.015882  |
| 1418026_at          | Exo1              | exonuclease 1                                              | 0.354 | 0.0041425 |
| 1416526_a_at        | Park7             | Parkinson disease (autosomal recessive, early onset) 7     | 0.354 | 0.0001778 |
| 1452192_at          | Naf1              | nuclear assembly factor 1 homolog ( <i>S. cerevisiae</i> ) | 0.355 | 0.0008141 |
| 1448794_s_at        | Dnajc2            | DnaJ (Hsp40) homolog, subfamily C, member 2                | 0.355 | 0.0112144 |
| 1428409_at          | Nat13             | N-acetyltransferase 13                                     | 0.355 | 0.0002025 |
| 1416203_at          | Aqp1              | aquaporin 1                                                | 0.355 | 0.0022967 |

|                     |         |                                                              |       |           |
|---------------------|---------|--------------------------------------------------------------|-------|-----------|
| 1416233_at          | Eif3i   | eukaryotic translation initiation factor 3, subunit I        | 0.355 | 0.000104  |
| 1438560_x_at        | Cct4    | chaperonin containing Tcp1, subunit 4 (delta)                | 0.356 | 0.0001316 |
| 1423855_x_at        | Rpl17   | ribosomal protein L17                                        | 0.356 | 0.0002695 |
| 1438951_x_at        | Nup54   | nucleoporin 54                                               | 0.356 | 0.00204   |
| 1452318_a_at        | Hspa1b  | heat shock protein 1B                                        | 0.357 | 0.0023531 |
| 1452885_at          | Sfrs2ip | splicing factor, arginine/serine-rich 2, interacting protein | 0.357 | 0.0098761 |
| 1448288_at          | Nfib    | nuclear factor I/B                                           | 0.357 | 0.0015387 |
| 1423971_at          | Thoc3   | THO complex 3                                                | 0.357 | 0.003011  |
| 1437197_at          | Sorbs2  | sorbin and SH3 domain containing 2                           | 0.357 | 0.001837  |
| 1437405_a_at        | Igfbp4  | insulin-like growth factor binding protein 4                 | 0.357 | 0.000138  |
| 1421054_at          | Xpo4    | exportin 4                                                   | 0.357 | 0.0035549 |
| 1457292_at          | Josd3   | Josephin domain containing 3                                 | 0.357 | 0.0003696 |
| 1451924_a_at        | Edn1    | endothelin 1                                                 | 0.358 | 0.0006519 |
| AFFX-r2-Bs-dap-5_at | NA      | NA                                                           | 0.358 | 0.0166975 |
| 1449706_s_at        | Nr5a2   | nuclear receptor subfamily 5, group A, member 2              | 0.358 | 0.0015062 |
| 1426853_at          | Set     | SET translocation                                            | 0.359 | 0.0001398 |
| 1423665_a_at        | Rpl5    | ribosomal protein L5                                         | 0.359 | 0.0001141 |



|                     |               |                                                              |       |           |
|---------------------|---------------|--------------------------------------------------------------|-------|-----------|
| 1426987_at          | 5430417L22Rik | RIKEN cDNA 5430417L22 gene                                   | 0.359 | 0.0050223 |
| 1449080_at          | Hdac2         | histone deacetylase 2                                        | 0.359 | 0.0002819 |
| 1456700_x_at        | Marcks        | myristoylated alanine rich protein kinase C substrate        | 0.360 | 0.000164  |
| 1416364_at          | Hsp90ab1      | heat shock protein 90kDa alpha (cytosolic), class B member 1 | 0.360 | 0.0007002 |
| 1427119_at          | Spink4        | serine peptidase inhibitor, Kazal type 4                     | 0.360 | 0.0027688 |
| 1433507_a_at        | LOC100039489  | similar to Hmgn2 protein                                     | 0.360 | 0.0001042 |
| 1422156_a_at        | Rps2          | ribosomal protein S2                                         | 0.360 | 0.0002491 |
| 1416685_s_at        | Fbl           | fibrillarlin                                                 | 0.361 | 0.0001332 |
| 1436000_a_at        | Skp2          | S-phase kinase-associated protein 2 (p45)                    | 0.361 | 0.0009183 |
| 1443649_at          | NA            | NA                                                           | 0.361 | 0.0003933 |
| AFFX-r2-Bs-phe-5_at | NA            | NA                                                           | 0.361 | 0.0231588 |
| 1434291_a_at        | Serf1         | small EDRK-rich factor 1                                     | 0.361 | 0.0010495 |
| 1455604_at          | Fzd5          | frizzled homolog 5 (Drosophila)                              | 0.361 | 0.0049529 |
| 1457218_at          | 6430510M02Rik | RIKEN cDNA 6430510M02 gene                                   | 0.361 | 0.0143397 |
| AFFX-PheX-M_at      | NA            | NA                                                           | 0.361 | 0.024711  |
| 1425042_s_at        | Pelp1         | proline, glutamic acid and leucine rich protein 1            | 0.362 | 0.0007188 |

|              |          |                                                                     |       |           |
|--------------|----------|---------------------------------------------------------------------|-------|-----------|
| 1416015_s_at | Abce1    | ATP-binding cassette, sub-family E (OABP), member 1                 | 0.362 | 0.000326  |
| 1448109_a_at | Rpl26    | ribosomal protein L26                                               | 0.362 | 0.0002108 |
| 1419838_s_at | Plk4     | polo-like kinase 4 (Drosophila)                                     | 0.362 | 0.0011697 |
| 1427873_at   | Defcr15  | defensin related cryptdin 15                                        | 0.363 | 0.0075767 |
| 1417139_at   | Dsn1     | DSN1, MIND kinetochore complex component, homolog (S. cerevisiae)   | 0.363 | 0.0004315 |
| 1422946_a_at | Dnmt1    | DNA methyltransferase (cytosine-5) 1                                | 0.363 | 0.0001411 |
| 1452158_at   | Eprs     | glutamyl-prolyl-tRNA synthetase                                     | 0.363 | 0.0008157 |
| 1456244_x_at | Glrx3    | glutaredoxin 3                                                      | 0.363 | 0.0001961 |
| 1456280_at   | Clspn    | claspin homolog (Xenopus laevis)                                    | 0.363 | 0.0014385 |
| 1415701_x_at | Rpl23    | ribosomal protein L23                                               | 0.363 | 0.0001503 |
| 1435213_at   | Nhlrc1   | NHL repeat containing 1                                             | 0.364 | 0.0001199 |
| 1437163_x_at | Gtf2h4   | general transcription factor II H, polypeptide 4                    | 0.364 | 0.0004829 |
| 1428744_s_at | Bri3bp   | Bri3 binding protein                                                | 0.364 | 0.000734  |
| 1439227_at   | NA       | NA                                                                  | 0.364 | 0.0017579 |
| 1456169_at   | EG226654 | predicted gene, EG226654                                            | 0.364 | 0.0007297 |
| 1437624_x_at | Nudt16l1 | nudix (nucleoside diphosphate linked moiety X)-type motif 16-like 1 | 0.364 | 0.0008872 |

|              |                   |                                                                |       |           |
|--------------|-------------------|----------------------------------------------------------------|-------|-----------|
| 1418840_at   | Pdcd4             | programmed cell death 4                                        | 0.364 | 0.000184  |
| 1419798_at   | 2610019E17Rik     | RIKEN cDNA 2610019E17 gene                                     | 0.364 | 0.0096965 |
| 1434977_at   | 4933403F05Rik     | RIKEN cDNA 4933403F05 gene                                     | 0.365 | 0.0061827 |
| 1447898_s_at | Sfrs6             | splicing factor, arginine/serine-rich 6                        | 0.366 | 0.0002398 |
| 1415876_a_at | Rps26             | ribosomal protein S26                                          | 0.366 | 0.0001908 |
| 1441231_at   | 100042016         | predicted gene, 100042016                                      | 0.366 | 0.0005607 |
| 1455364_a_at | Rps7              | ribosomal protein S7                                           | 0.366 | 0.0001381 |
| 1422623_x_at | Rpl41             | ribosomal protein L41                                          | 0.366 | 0.0001488 |
| 1455577_at   | Ccl28             | chemokine (C-C motif) ligand 28                                | 0.367 | 0.0018493 |
| 1435791_x_at | ENSMUSG0000066475 | predicted gene, ENSMUSG0000066475                              | 0.367 | 0.0003142 |
| 1424616_s_at | Frag1             | FGF receptor activating protein 1                              | 0.367 | 0.001073  |
| 1422579_at   | Hspe1             | heat shock protein 1 (chaperonin 10)                           | 0.367 | 0.0008996 |
| 1422439_a_at | Cdk4              | cyclin-dependent kinase 4                                      | 0.367 | 0.0011109 |
| 1436046_x_at | Rpl29             | ribosomal protein L29                                          | 0.367 | 0.0009101 |
| 1434079_s_at | Mcm2              | minichromosome maintenance deficient 2 mitotin (S. cerevisiae) | 0.367 | 0.0036663 |
| 1455988_a_at | LOC100038887      | hypothetical protein LOC100038887                              | 0.368 | 0.0001592 |
| 1422660_at   | Rbm3              | RNA binding motif protein 3                                    | 0.368 | 0.0002319 |

|                     |                |                                                                                                   |       |           |
|---------------------|----------------|---------------------------------------------------------------------------------------------------|-------|-----------|
| 1440285_at          | Ppp1r9a        | protein phosphatase 1, regulatory (inhibitor) subunit 9A                                          | 0.368 | 0.0010701 |
| 1422461_at          | Atad3a         | ATPase family, AAA domain containing 3A                                                           | 0.368 | 0.0007502 |
| 1418040_at          | Tmem186        | transmembrane protein 186                                                                         | 0.369 | 0.0002681 |
| 1424281_at          | Ubap2          | ubiquitin-associated protein 2                                                                    | 0.369 | 0.0009398 |
| 1435277_x_at        | Nme1           | non-metastatic cells 1, protein (NM23A) expressed in                                              | 0.369 | 0.0003212 |
| 1426790_at          | Ssrp1          | structure specific recognition protein 1                                                          | 0.369 | 0.0054578 |
| 1433623_at          | Zfp367         | zinc finger protein 367                                                                           | 0.369 | 0.0004233 |
| 1453722_s_at        | LOC100048559   | similar to splicing factor, arginine/serine-rich 1 (splicing factor 2, alternate splicing factor) | 0.369 | 0.0003397 |
| 1416894_at          | 1500019G21 Rik | RIKEN cDNA 1500019G21 gene                                                                        | 0.370 | 0.0051286 |
| 1432164_a_at        | Gcsh           | glycine cleavage system protein H (aminomethyl carrier)                                           | 0.370 | 0.0003576 |
| AFFX-r2-Bs-lys-5_at | NA             | NA                                                                                                | 0.370 | 0.0195983 |
| 1417998_at          | Ptges3         | prostaglandin E synthase 3 (cytosolic)                                                            | 0.370 | 0.0006196 |

|              |               |                                                                                                       |       |           |
|--------------|---------------|-------------------------------------------------------------------------------------------------------|-------|-----------|
| 1436298_x_at | Paics         | phosphoribosylaminoimidazole carboxylase, phosphoribosylaminoimidazole, succinocarboxamide synthetase | 0.370 | 0.0014562 |
| 1438429_at   | 2610319H10Rik | RIKEN cDNA 2610319H10 gene                                                                            | 0.370 | 0.0014542 |
| 1417062_at   | Armc10        | armadillo repeat containing 10                                                                        | 0.372 | 0.0001968 |
| 1434025_at   | NA            | NA                                                                                                    | 0.372 | 0.0004463 |
| 1426789_s_at | Ssrp1         | structure specific recognition protein 1                                                              | 0.372 | 0.0002259 |
| 1452333_at   | Smarca2       | SWI/SNF related, matrix associated, actin dependent regulator of chromatin, subfamily a, member 2     | 0.373 | 0.0224561 |
| 1431766_x_at | Rps2          | ribosomal protein S2                                                                                  | 0.373 | 0.0009402 |
| 1449635_at   | Prpf19        | PRP19/PSO4 pre-mRNA processing factor 19 homolog (S. cerevisiae)                                      | 0.373 | 0.0020157 |
| 1425560_a_at | S100a16       | S100 calcium binding protein A16                                                                      | 0.373 | 0.0022022 |
| 1416054_at   | Rps5          | ribosomal protein S5                                                                                  | 0.373 | 0.0001982 |
| 1416585_at   | Ruvbl1        | RuvB-like protein 1                                                                                   | 0.373 | 0.0002696 |
| 1452388_at   | Hspa1a        | heat shock protein 1A                                                                                 | 0.373 | 0.0049689 |
| 1448846_a_at | Rpl29         | ribosomal protein L29                                                                                 | 0.374 | 0.000633  |

|                |               |                                                                     |       |           |
|----------------|---------------|---------------------------------------------------------------------|-------|-----------|
| 1435841_s_at   | Suclg2        | succinate-Coenzyme A ligase, GDP-forming, beta subunit              | 0.375 | 0.0004236 |
| 1437848_x_at   | Adpgk         | ADP-dependent glucokinase                                           | 0.375 | 0.0054434 |
| 1436924_x_at   | Rpl31         | ribosomal protein L31                                               | 0.375 | 0.0002897 |
| 1428622_at     | Depdc6        | DEP domain containing 6                                             | 0.375 | 0.0002897 |
| 1460037_at     | 2610510H03Rik | RIKEN cDNA 2610510H03 gene                                          | 0.376 | 0.0004767 |
| 1450914_at     | Ppp1r14b      | protein phosphatase 1, regulatory (inhibitor) subunit 14B           | 0.376 | 0.0009267 |
| 1434173_s_at   | D19Bwg1357e   | DNA segment, Chr 19, Brigham & Women@#\$%&s Genetics 1357 expressed | 0.376 | 0.0006635 |
| 1423456_at     | Bzw2          | basic leucine zipper and W2 domains 2                               | 0.376 | 0.0015376 |
| 1447703_x_at   | Zfp593        | zinc finger protein 593                                             | 0.376 | 0.0002436 |
| 1443909_at     | Cstf3         | cleavage stimulation factor, 3@#\$%& pre-RNA, subunit 3             | 0.376 | 0.0002686 |
| 1421819_a_at   | Set           | SET translocation                                                   | 0.376 | 0.0010025 |
| AFFX-DapX-5_at | NA            | NA                                                                  | 0.376 | 0.0204709 |
| 1428797_at     | Setd6         | SET domain containing 6                                             | 0.376 | 0.0002251 |
| 1416595_at     | Mrps22        | mitochondrial ribosomal protein S22                                 | 0.377 | 0.0008636 |
| 1456359_at     | Ppwd1         | peptidylprolyl isomerase domain and WD repeat containing 1          | 0.377 | 0.0056746 |

|              |               |                                                                |       |           |
|--------------|---------------|----------------------------------------------------------------|-------|-----------|
| 1437709_x_at | Ttc13         | tetratricopeptide repeat domain 13                             | 0.377 | 0.0003607 |
| 1415829_at   | Lbr           | lamin B receptor                                               | 0.377 | 0.0008268 |
| 1455305_x_at | Hnrnpa1       | heterogeneous nuclear ribonucleoprotein A1                     | 0.377 | 0.0001818 |
| 1453314_x_at | 2610039C10Rik | RIKEN cDNA 2610039C10 gene                                     | 0.378 | 0.0007675 |
| 1422547_at   | Ranbp1        | RAN binding protein 1                                          | 0.378 | 0.0002343 |
| 1434820_s_at | Pkig          | protein kinase inhibitor, gamma                                | 0.378 | 0.0007559 |
| 1436189_at   | NA            | NA                                                             | 0.378 | 0.0134049 |
| 1418273_a_at | Rpl30         | ribosomal protein L30                                          | 0.378 | 0.0001646 |
| 1437908_a_at | Ergic1        | endoplasmic reticulum-golgi intermediate compartment (ERGIC) 1 | 0.378 | 0.0004423 |
| 1452154_at   | lars          | isoleucine-tRNA synthetase                                     | 0.378 | 0.0025805 |
| 1449117_at   | Jund          | Jun proto-oncogene related gene d                              | 0.379 | 0.0021446 |
| 1449628_s_at | Stard7        | START domain containing 7                                      | 0.379 | 0.0008861 |
| 1434328_at   | Rpl15         | ribosomal protein L15                                          | 0.379 | 0.0003635 |
| 1452036_a_at | Tmpo          | thymopoietin                                                   | 0.379 | 0.0007485 |
| 1428316_a_at | Fundc2        | FUN14 domain containing 2                                      | 0.379 | 0.0002521 |
| 1451405_at   | Pcca          | propionyl-Coenzyme A carboxylase, alpha polypeptide            | 0.379 | 0.0004608 |
| 1437027_x_at | Rnps1         | ribonucleic acid binding protein S1                            | 0.379 | 0.0001574 |
| 1455348_x_at | Rpl29         | ribosomal protein L29                                          | 0.379 | 0.0006443 |

|              |              |                                                           |       |           |
|--------------|--------------|-----------------------------------------------------------|-------|-----------|
| 1454993_a_at | Sfrs3        | splicing factor, arginine/serine-rich 3 (SRp20)           | 0.379 | 0.0001732 |
| 1437280_s_at | Serbp1       | Serpine1 mRNA binding protein 1                           | 0.380 | 0.0005488 |
| 1448357_at   | Snrpg        | small nuclear ribonucleoprotein polypeptide G             | 0.380 | 0.0006623 |
| 1433445_x_at | LOC100040592 | similar to Hmgcs1 protein                                 | 0.380 | 0.0002777 |
| 1426574_a_at | Add3         | adducin 3 (gamma)                                         | 0.380 | 0.0005184 |
| 1424473_at   | Polr2h       | polymerase (RNA) II (DNA directed) polypeptide H          | 0.380 | 0.0010748 |
| 1433472_x_at | Rpl38        | ribosomal protein L38                                     | 0.380 | 0.0009313 |
| 1448665_at   | Dmd          | dystrophin, muscular dystrophy                            | 0.380 | 0.0053999 |
| 1450657_at   | Ppie         | peptidylprolyl isomerase E (cyclophilin E)                | 0.381 | 0.0010229 |
| 1424323_at   | Noc2l        | nucleolar complex associated 2 homolog (S. cerevisiae)    | 0.381 | 0.0001559 |
| 1433689_s_at | Rps9         | ribosomal protein S9                                      | 0.381 | 0.000196  |
| 1456319_at   | NA           | NA                                                        | 0.381 | 0.026558  |
| 1433428_x_at | Tgm2         | transglutaminase 2, C polypeptide                         | 0.381 | 0.0019031 |
| 1435484_at   | Slc5a3       | solute carrier family 5 (inositol transporters), member 3 | 0.381 | 0.0038114 |



|              |          |                                                                                        |       |           |
|--------------|----------|----------------------------------------------------------------------------------------|-------|-----------|
| 1449506_a_at | Eef1d    | eukaryotic translation elongation factor 1 delta (guanine nucleotide exchange protein) | 0.381 | 0.0001733 |
| 1437377_a_at | Polrmt   | polymerase (RNA) mitochondrial (DNA directed)                                          | 0.381 | 0.0002966 |
| 1424204_at   | Mrpl13   | mitochondrial ribosomal protein L13                                                    | 0.382 | 4.00E-04  |
| 1438072_at   | NA       | NA                                                                                     | 0.382 | 0.0017374 |
| 1434972_x_at | Sfrs1    | splicing factor, arginine/serine-rich 1 (ASF/SF2)                                      | 0.382 | 0.0002725 |
| 1458341_x_at | NA       | NA                                                                                     | 0.382 | 0.0005792 |
| 1424953_at   | BC021614 | cDNA sequence BC021614                                                                 | 0.383 | 0.0002815 |
| 1424377_at   | BC003885 | cDNA sequence BC003885                                                                 | 0.383 | 0.002103  |
| 1456625_at   | Aasdhppt | aminoadipate-semialdehyde dehydrogenase-phosphopantetheinyl transferase                | 0.383 | 0.0020162 |
| 1436174_at   | Atad2    | ATPase family, AAA domain containing 2                                                 | 0.383 | 0.0004821 |
| 1417126_a_at | Rpl22l1  | ribosomal protein L22 like 1                                                           | 0.383 | 0.0001911 |
| 1428296_at   | Polr2l   | polymerase (RNA) II (DNA directed) polypeptide L                                       | 0.383 | 0.0001791 |
| 1423050_s_at | Hnrnpu   | heterogeneous nuclear ribonucleoprotein U                                              | 0.383 | 0.0001828 |

|                    |                   |                                                                                                                        |       |           |
|--------------------|-------------------|------------------------------------------------------------------------------------------------------------------------|-------|-----------|
| 1456097_a_at       | Itgb3bp           | integrin beta 3 binding protein (beta3-<br>endonexin)                                                                  | 0.383 | 0.0020699 |
| 1448353_x_at       | Rpn1              | ribophorin I                                                                                                           | 0.383 | 0.0025763 |
| 1428557_a_at       | Osgepl1           | O-<br>sialoglycoprotein<br>endopeptidase-<br>like 1                                                                    | 0.383 | 0.0006389 |
| 1424321_at         | Rfc4              | replication factor<br>C (activator 1) 4                                                                                | 0.383 | 0.0011518 |
| 1448697_s_at       | Rpl36al           | ribosomal protein<br>L36a-like                                                                                         | 0.383 | 0.0002859 |
| 1450150_a_at       | Rpl13             | ribosomal protein<br>L13                                                                                               | 0.383 | 0.0002352 |
| 1455246_at         | Smarcc1           | SWI/SNF related,<br>matrix<br>associated, actin<br>dependent<br>regulator of<br>chromatin,<br>subfamily c,<br>member 1 | 0.383 | 0.0001675 |
| 1453208_at         | 2700089E24R<br>ik | RIKEN cDNA<br>2700089E24<br>gene                                                                                       | 0.384 | 0.0006401 |
| AFFX-LysX-<br>M_at | NA                | NA                                                                                                                     | 0.384 | 0.0186743 |
| 1428465_at         | Tmem147           | transmembrane<br>protein 147                                                                                           | 0.384 | 0.0091608 |
| 1417057_a_at       | Ppid              | peptidylprolyl<br>isomerase D<br>(cyclophilin D)                                                                       | 0.384 | 0.0004639 |
| 1427886_at         | Pom121            | nuclear pore<br>membrane<br>protein 121                                                                                | 0.384 | 0.0006776 |
| 1454607_s_at       | Psat1             | phosphoserine<br>aminotransferase<br>1                                                                                 | 0.384 | 0.0010908 |
| 1427680_a_at       | Nfib              | nuclear factor I/B                                                                                                     | 0.384 | 0.0036235 |
| 1450780_s_at       | Hmga2             | high mobility<br>group AT-hook 2                                                                                       | 0.385 | 0.0026831 |

|              |             |                                                              |       |           |
|--------------|-------------|--------------------------------------------------------------|-------|-----------|
| 1420476_a_at | Nap111      | nucleosome assembly protein 1-like 1                         | 0.385 | 0.0030234 |
| 1423522_at   | Npm3        | nucleoplasmin 3                                              | 0.385 | 0.002368  |
| 1460701_a_at | Mrpl52      | mitochondrial ribosomal protein L52                          | 0.385 | 0.0002567 |
| 1451346_at   | Mtap        | methylthioadenosine phosphorylase                            | 0.385 | 0.003886  |
| 1452171_at   | Grwd1       | glutamate-rich WD repeat containing 1                        | 0.385 | 0.0016644 |
| 1438902_a_at | Hsp90aa1    | heat shock protein 90, alpha (cytosolic), class A member 1   | 0.385 | 0.000877  |
| 1428746_a_at | Trspap1     | tRNA selenocysteine associated protein 1                     | 0.386 | 0.0018703 |
| 1452725_a_at | Rnaseh2a    | ribonuclease H2, large subunit                               | 0.386 | 0.0001956 |
| 1429077_x_at | Rpl21       | ribosomal protein L21                                        | 0.386 | 0.0001797 |
| 1416123_at   | Ccnd2       | cyclin D2                                                    | 0.386 | 0.0014264 |
| 1434745_at   | Ccnd2       | cyclin D2                                                    | 0.386 | 0.0002184 |
| 1428339_at   | Nudt21      | nudix (nucleoside diphosphate linked moiety X)-type motif 21 | 0.387 | 0.0009627 |
| 1415912_a_at | Rps13       | ribosomal protein S13                                        | 0.387 | 0.0002215 |
| 1457539_at   | D10ErtD709e | DNA segment, Chr 10, ERATO Doi 709, expressed                | 0.387 | 0.0082605 |
| 1434513_at   | Atp13a3     | ATPase type 13A3                                             | 0.387 | 0.0008234 |

|                         |                        |                                                                                              |       |           |
|-------------------------|------------------------|----------------------------------------------------------------------------------------------|-------|-----------|
| 1416616_s_at            | Clpp                   | caseinolytic<br>peptidase, ATP-<br>dependent,<br>proteolytic<br>subunit homolog<br>(E. coli) | 0.388 | 0.0003256 |
| 1428326_s_at            | Hrsp12                 | heat-responsive<br>protein 12                                                                | 0.388 | 0.0012104 |
| 1428919_at              | Fgfr1op                | Fgfr1 oncogene<br>partner                                                                    | 0.388 | 0.0018292 |
| 1427875_a_at            | ENSMUSG00<br>000068396 | predicted gene,<br>ENSMUSG00000<br>068396                                                    | 0.388 | 0.0003371 |
| 1450423_s_at            | Bxdc1                  | brix domain<br>containing 1                                                                  | 0.388 | 0.0037864 |
| 1453071_s_at            | Kdelc2                 | KDEL (Lys-Asp-<br>Glu-Leu)<br>containing 2                                                   | 0.388 | 0.0065386 |
| 1415762_x_at            | Mrpl52                 | mitochondrial<br>ribosomal protein<br>L52                                                    | 0.388 | 0.0002358 |
| 1422881_s_at            | Sypl                   | synaptophysin-<br>like protein                                                               | 0.389 | 0.0003987 |
| 1450339_a_at            | Bcl11b                 | B-cell<br>leukemia/lympho<br>ma 11B                                                          | 0.389 | 0.0007263 |
| 1417058_a_at            | Krtcap2                | keratinocyte<br>associated<br>protein 2                                                      | 0.389 | 0.00019   |
| 1427965_at              | Ssbp1                  | single-stranded<br>DNA binding<br>protein 1                                                  | 0.389 | 0.0019007 |
| 1423764_s_at            | Mrpl37                 | mitochondrial<br>ribosomal protein<br>L37                                                    | 0.390 | 0.0021057 |
| 1455357_x_at            | OTTMUSG00<br>000016825 | predicted gene,<br>OTTMUSG00000<br>016825                                                    | 0.390 | 0.0006858 |
| 1460543_x_at            | Rpl37a                 | ribosomal protein<br>L37a                                                                    | 0.390 | 0.0007806 |
| AFFX-r2-Bs-lys-<br>M_at | NA                     | NA                                                                                           | 0.390 | 0.0211552 |
| 1448504_a_at            | Cbx3                   | chromobox<br>homolog 3<br>(Drosophila HP1<br>gamma)                                          | 0.390 | 0.0006497 |

|                     |                   |                                                                |       |           |
|---------------------|-------------------|----------------------------------------------------------------|-------|-----------|
| 1423046_s_at        | Ncbp2             | nuclear cap binding protein subunit 2                          | 0.390 | 0.0036935 |
| 1428212_x_at        | ENSMUSG0000066956 | predicted gene, ENSMUSG0000066956                              | 0.392 | 0.0002727 |
| 1422849_a_at        | Pabpn1            | poly(A) binding protein, nuclear 1                             | 0.392 | 0.0023331 |
| 1454866_s_at        | Clic6             | chloride intracellular channel 6                               | 0.392 | 0.0042603 |
| AFFX-r2-Bs-lys-3_at | NA                | NA                                                             | 0.392 | 0.0258624 |
| 1460198_a_at        | Psmb3             | proteasome (prosome, macropain) subunit, beta type 3           | 0.392 | 0.0007444 |
| 1423081_a_at        | Tomm20            | translocase of outer mitochondrial membrane 20 homolog (yeast) | 0.392 | 0.0011992 |
| 1449255_a_at        | Rpl15             | ribosomal protein L15                                          | 0.392 | 0.000323  |
| 1450840_a_at        | Rpl39             | ribosomal protein L39                                          | 0.392 | 0.0006474 |
| 1448799_s_at        | Mrps12            | mitochondrial ribosomal protein S12                            | 0.392 | 0.0013505 |
| 1429054_at          | Mrpl47            | mitochondrial ribosomal protein L47                            | 0.392 | 0.0005639 |
| 1423754_at          | Ifitm3            | interferon induced transmembrane protein 3                     | 0.392 | 0.0005355 |
| 1417273_at          | Pdk4              | pyruvate dehydrogenase kinase, isoenzyme 4                     | 0.393 | 0.0032126 |
| 1437456_x_at        | Ythdf1            | YTH domain family 1                                            | 0.393 | 0.0005486 |
| 1448938_at          | Rpa3              | replication protein A3                                         | 0.393 | 0.000207  |
| 1423969_at          | Nup37             | nucleoporin 37                                                 | 0.393 | 0.0015534 |

|              |                   |                                                  |       |           |
|--------------|-------------------|--------------------------------------------------|-------|-----------|
| 1437694_at   | NA                | NA                                               | 0.393 | 0.0035438 |
| 1434688_x_at | Drg1              | developmentally regulated GTP binding protein 1  | 0.393 | 0.0004964 |
| 1428822_a_at | Snx24             | sorting nexin 24                                 | 0.394 | 0.0016371 |
| 1423674_at   | Usp1              | ubiquitin specific peptidase 1                   | 0.394 | 0.0007444 |
| 1447854_s_at | Hist2h2be         | histone cluster 2, H2be                          | 0.394 | 0.000659  |
| 1424033_at   | Sfrs7             | splicing factor, arginine/serine-rich 7          | 0.394 | 0.0021293 |
| 1453049_at   | 6620401M08<br>Rik | RIKEN cDNA 6620401M08 gene                       | 0.394 | 0.0005062 |
| 1460225_at   | Mrp63             | mitochondrial ribosomal protein 63               | 0.394 | 0.0083051 |
| 1424000_a_at | Rps11             | ribosomal protein S11                            | 0.395 | 0.0002674 |
| 1439089_at   | Zbtb41            | zinc finger and BTB domain containing 41 homolog | 0.395 | 0.0012036 |
| 1416176_at   | Hmgb1             | high mobility group box 1                        | 0.395 | 0.0002546 |
| 1416719_a_at | Rps10             | ribosomal protein S10                            | 0.395 | 0.0002317 |
| 1426152_a_at | Kitl              | kit ligand                                       | 0.395 | 0.0132201 |
| 1433447_x_at | Cct4              | chaperonin containing Tcp1, subunit 4 (delta)    | 0.395 | 0.0002467 |
| 1457814_at   | NA                | NA                                               | 0.396 | 0.0287074 |
| 1421731_a_at | Fen1              | flap structure specific endonuclease 1           | 0.396 | 0.000348  |
| 1438322_x_at | Fdft1             | farnesyl diphosphate farnesyl transferase 1      | 0.396 | 0.0004363 |
| 1420489_at   | Mrps14            | mitochondrial ribosomal protein S14              | 0.396 | 0.0026403 |

|              |                   |                                                             |       |           |
|--------------|-------------------|-------------------------------------------------------------|-------|-----------|
| 1416158_at   | Nr2f2             | nuclear receptor subfamily 2, group F, member 2             | 0.396 | 0.0074781 |
| 1451199_at   | Qtrtd1            | queuine tRNA-ribosyltransferase domain containing 1         | 0.396 | 0.0019002 |
| 1439438_a_at | EG625193          | predicted gene, EG625193                                    | 0.396 | 0.0006294 |
| 1437277_x_at | Tgm2              | transglutaminase 2, C polypeptide                           | 0.396 | 0.0007437 |
| 1438969_x_at | Dhx30             | DEAH (Asp-Glu-Ala-His) box polypeptide 30                   | 0.396 | 0.0011457 |
| 1450087_a_at | Nolc1             | nucleolar and coiled-body phosphoprotein 1                  | 0.397 | 0.0165036 |
| 1416212_at   | Magoh             | mago-nashi homolog, proliferation-associated (Drosophila)   | 0.397 | 0.0004922 |
| 1434872_x_at | OTTMUSG0000009529 | predicted gene, OTTMUSG0000009529                           | 0.397 | 0.0002185 |
| 1451989_a_at | Mapre2            | microtubule-associated protein, RP/EB family, member 2      | 0.397 | 0.0083649 |
| 1458086_at   | 4732471D19Rik     | RIKEN cDNA 4732471D19 gene                                  | 0.397 | 0.0075212 |
| 1435488_at   | 1110019K23Rik     | RIKEN cDNA 1110019K23 gene                                  | 0.398 | 0.0005292 |
| 1426783_at   | Kat2a             | K(lysine) acetyltransferase 2A                              | 0.398 | 0.0075692 |
| 1453565_at   | Ndufab1           | NADH dehydrogenase (ubiquinone) 1, alpha/beta subcomplex, 1 | 0.398 | 0.0286608 |

|              |              |                                                                                          |       |           |
|--------------|--------------|------------------------------------------------------------------------------------------|-------|-----------|
| 1452838_at   | Ddx10        | DEAD (Asp-Glu-Ala-Asp) box polypeptide 10                                                | 0.398 | 0.0002906 |
| 1448009_at   | LOC100044322 | similar to UDP-glucose ceramide glucosyltransferase-like 1                               | 0.398 | 0.0107038 |
| 1424991_s_at | Tyms         | thymidylate synthase                                                                     | 0.399 | 0.0022457 |
| 1423795_at   | Sfpq         | splicing factor proline/glutamine rich (polypyrimidine tract binding protein associated) | 0.399 | 0.0007498 |
| 1430536_a_at | Erh          | enhancer of rudimentary homolog (Drosophila)                                             | 0.399 | 0.0014455 |
| 1449648_s_at | Rpo1-1       | RNA polymerase 1-1                                                                       | 0.399 | 0.000344  |
| 1425881_at   | Psg28        | pregnancy-specific glycoprotein 28                                                       | 0.399 | 0.02695   |
| 1418585_at   | Ccnh         | cyclin H                                                                                 | 0.399 | 0.0087226 |
| 1417028_a_at | Trim2        | tripartite motif-containing 2                                                            | 0.399 | 0.0091498 |
| 1416362_a_at | Fkbp4        | FK506 binding protein 4                                                                  | 0.399 | 0.0025733 |
| 1424353_at   | Lrpprc       | leucine-rich PPR-motif containing                                                        | 0.400 | 0.0019694 |
| 1416089_at   | Rps15        | ribosomal protein S15                                                                    | 0.400 | 0.0002467 |
| 1443814_x_at | Ctsh         | cathepsin H                                                                              | 0.400 | 0.0046725 |
| 1416420_a_at | Rpl9         | ribosomal protein L9                                                                     | 0.400 | 0.0002838 |
| 1416024_x_at | Cct3         | chaperonin containing Tcp1, subunit 3 (gamma)                                            | 0.400 | 0.0006439 |



|              |               |                                                       |       |           |
|--------------|---------------|-------------------------------------------------------|-------|-----------|
| 1452692_a_at | Ndufv2        | NADH dehydrogenase (ubiquinone) flavoprotein 2        | 0.400 | 0.0004425 |
| 1451068_s_at | Rps25         | ribosomal protein S25                                 | 0.401 | 0.000402  |
| 1416152_a_at | Sfrs3         | splicing factor, arginine/serine-rich 3 (SRp20)       | 0.401 | 0.0010236 |
| 1420965_a_at | Enc1          | ectodermal-neural cortex 1                            | 0.401 | 0.0012785 |
| 1416700_at   | Rnd3          | Rho family GTPase 3                                   | 0.402 | 0.0029508 |
| 1421019_at   | 1700021F05Rik | RIKEN cDNA 1700021F05 gene                            | 0.402 | 0.0002847 |
| 1437621_x_at | Phgdh         | 3-phosphoglycerate dehydrogenase                      | 0.402 | 0.0018976 |
| 1415869_a_at | Trim28        | tripartite motif-containing 28                        | 0.402 | 0.0008233 |
| 1416915_at   | Msh6          | mutS homolog 6 (E. coli)                              | 0.402 | 0.0014155 |
| 1423702_at   | H1f0          | H1 histone family, member 0                           | 0.402 | 0.0021899 |
| 1428152_a_at | Rpl18a        | ribosomal protein L18A                                | 0.402 | 0.000277  |
| 1460353_at   | Tmem48        | transmembrane protein 48                              | 0.402 | 0.0037625 |
| 1433855_at   | Abat          | 4-aminobutyrate aminotransferase                      | 0.402 | 0.0037562 |
| 1426002_a_at | Cdc7          | cell division cycle 7 (S. cerevisiae)                 | 0.402 | 0.0007067 |
| 1452144_a_at | Mrpl44        | mitochondrial ribosomal protein L44                   | 0.402 | 0.0005076 |
| 1423160_at   | Spred1        | sprouty protein with EVH-1 domain 1, related sequence | 0.403 | 0.001307  |

|                |               |                                                                 |       |           |
|----------------|---------------|-----------------------------------------------------------------|-------|-----------|
| 1437975_a_at   | Rpl23a        | ribosomal protein L23a                                          | 0.403 | 0.0002656 |
| 1437749_s_at   | Mrpl9         | mitochondrial ribosomal protein L9                              | 0.403 | 0.0009216 |
| 1417078_at     | Lgals2        | lectin, galactose-binding, soluble 2                            | 0.403 | 0.0005306 |
| 1455878_at     | 2700023E23Rik | RIKEN cDNA 2700023E23 gene                                      | 0.403 | 0.0035751 |
| 1435734_x_at   | Dus1l         | dihydrouridine synthase 1-like (S. cerevisiae)                  | 0.403 | 0.0004779 |
| 1428182_at     | Prpsap1       | phosphoribosyl pyrophosphate synthetase-associated protein 1    | 0.403 | 0.0021528 |
| 1428800_a_at   | Pus7l         | pseudouridylate synthase 7 homolog (S. cerevisiae)-like         | 0.403 | 0.0035761 |
| 1420139_s_at   | Krr1          | KRR1, small subunit (SSU) processome component, homolog (yeast) | 0.404 | 0.0002899 |
| 1423142_a_at   | Gtpbp4        | GTP binding protein 4                                           | 0.404 | 0.0008888 |
| 1437005_a_at   | Rpl18         | ribosomal protein L18                                           | 0.405 | 0.0008731 |
| 1435368_a_at   | Parp1         | poly (ADP-ribose) polymerase family, member 1                   | 0.405 | 0.0007267 |
| AFFX-PheX-3_at | NA            | NA                                                              | 0.405 | 0.0243495 |
| 1440254_at     | 100041277     | predicted gene, 100041277                                       | 0.405 | 0.0038341 |
| 1415855_at     | Kitl          | kit ligand                                                      | 0.406 | 0.0049501 |

|              |                |                                                                                 |       |           |
|--------------|----------------|---------------------------------------------------------------------------------|-------|-----------|
| 1435821_s_at | Ppp1r8         | protein phosphatase 1, regulatory (inhibitor) subunit 8                         | 0.406 | 0.0005415 |
| 1416277_a_at | Rplp1          | ribosomal protein, large, P1                                                    | 0.406 | 0.0003616 |
| 1435628_x_at | BC005512       | cDNA sequence BC005512                                                          | 0.406 | 0.0255497 |
| 1441768_at   | 9430051O21 Rik | RIKEN cDNA 9430051O21 gene                                                      | 0.406 | 0.0050528 |
| 1426724_at   | Cnn3           | calponin 3, acidic                                                              | 0.406 | 0.0004414 |
| 1435324_x_at | Hmgb1          | high mobility group box 1                                                       | 0.406 | 0.0006393 |
| 1442710_at   | NA             | NA                                                                              | 0.406 | 0.0063676 |
| 1419460_at   | Rpp14          | ribonuclease P 14 subunit (human)                                               | 0.407 | 0.0022158 |
| 1423749_s_at | Rangap1        | RAN GTPase activating protein 1                                                 | 0.407 | 0.0010662 |
| 1435338_at   | Cdk6           | cyclin-dependent kinase 6                                                       | 0.407 | 0.0004482 |
| 1436007_a_at | Thumpd1        | THUMP domain containing 1                                                       | 0.407 | 0.0004251 |
| 1438852_x_at | Mcm6           | minichromosome maintenance deficient 6 (MIS5 homolog, S. pombe) (S. cerevisiae) | 0.407 | 0.0003985 |
| 1416858_a_at | Fkbp3          | FK506 binding protein 3                                                         | 0.407 | 0.0005058 |
| 1427127_x_at | Hspa1b         | heat shock protein 1B                                                           | 0.408 | 0.0030923 |
| 1460048_at   | Zdhhc13        | zinc finger, DHHC domain containing 13                                          | 0.408 | 0.0067917 |
| 1455719_at   | Tubb5          | tubulin, beta 5                                                                 | 0.408 | 0.0016498 |

|                           |                   |                                                                                               |       |           |
|---------------------------|-------------------|-----------------------------------------------------------------------------------------------|-------|-----------|
| 1438120_x_at              | Irak1             | interleukin-1<br>receptor-<br>associated kinase<br>1                                          | 0.409 | 0.0038784 |
| 1443867_at                | Ankrd12           | ankyrin repeat<br>domain 12                                                                   | 0.409 | 0.0351633 |
| 1437543_at                | Fubp1             | far upstream<br>element (FUSE)<br>binding protein 1                                           | 0.409 | 0.0059312 |
| 1439464_s_at              | Tex10             | testis expressed<br>gene 10                                                                   | 0.409 | 0.0031522 |
| 1415947_at                | Creg1             | cellular repressor<br>of E1A-stimulated<br>genes 1                                            | 0.409 | 0.0019831 |
| 1447728_x_at              | Hspa9             | heat shock<br>protein 9                                                                       | 0.409 | 0.0053605 |
| 1436824_x_at              | Rnf26             | ring finger protein<br>26                                                                     | 0.409 | 0.0011388 |
| 1435645_at                | Mmd               | monocyte to<br>macrophage<br>differentiation-<br>associated                                   | 0.409 | 0.0016838 |
| 1417313_at                | Lsm7              | LSM7 homolog,<br>U6 small nuclear<br>RNA associated<br>( <i>S. cerevisiae</i> )               | 0.409 | 0.0006055 |
| 1437450_x_at              | 2700060E02R<br>ik | RIKEN cDNA<br>2700060E02<br>gene                                                              | 0.409 | 0.0003902 |
| AFFX-r2-Bs-thr-<br>3_s_at | NA                | NA                                                                                            | 0.409 | 0.0243402 |
| 1437839_x_at              | Mrpl11            | mitochondrial<br>ribosomal protein<br>L11                                                     | 0.409 | 0.0055296 |
| 1436113_a_at              | St13              | suppression of<br>tumorigenicity 13                                                           | 0.409 | 0.0003541 |
| 1419839_x_at              | Prpf19            | PRP19/PSO4 pre-<br>mRNA<br>processing factor<br>19 homolog ( <i>S.</i><br><i>cerevisiae</i> ) | 0.409 | 0.0027692 |

|              |              |                                                                                    |       |           |
|--------------|--------------|------------------------------------------------------------------------------------|-------|-----------|
| 1433443_a_at | LOC100040592 | similar to Hmgcs1 protein                                                          | 0.409 | 0.000599  |
| 1439106_at   | Zfp462       | zinc finger protein 462                                                            | 0.409 | 0.0034138 |
| 1418640_at   | Sirt1        | sirtuin 1 (silent mating type information regulation 2, homolog) 1 (S. cerevisiae) | 0.410 | 0.000657  |
| 1448793_a_at | Sdc4         | syndecan 4                                                                         | 0.410 | 0.009762  |
| 1448224_at   | Tfam         | transcription factor A, mitochondrial                                              | 0.410 | 0.0022535 |
| 1428976_at   | Tmpo         | thymopoietin                                                                       | 0.410 | 0.0005547 |
| 1438386_x_at | Mat2a        | methionine adenosyltransferase II, alpha                                           | 0.410 | 0.0006098 |
| 1447750_x_at | Pih1d1       | PIH1 domain containing 1                                                           | 0.411 | 0.0075346 |
| 1416122_at   | Ccnd2        | cyclin D2                                                                          | 0.411 | 0.0006332 |
| 1448536_at   | Lsm3         | LSM3 homolog, U6 small nuclear RNA associated (S. cerevisiae)                      | 0.411 | 0.0003111 |
| 1450849_at   | Hnrnpu       | heterogeneous nuclear ribonucleoprotein U                                          | 0.411 | 0.0431334 |
| 1439755_at   | Sipa111      | signal-induced proliferation-associated 1 like 1                                   | 0.411 | 0.0050121 |
| 1452839_at   | Dph5         | DPH5 homolog (S. cerevisiae)                                                       | 0.411 | 0.0009298 |
| 1428112_at   | Armet        | arginine-rich, mutated in early stage tumors                                       | 0.412 | 0.001942  |
| 1416742_at   | Cfdp1        | craniofacial development protein 1                                                 | 0.412 | 0.000476  |

|              |               |                                                                                                   |       |           |
|--------------|---------------|---------------------------------------------------------------------------------------------------|-------|-----------|
| 1430982_at   | LOC100048559  | similar to splicing factor, arginine/serine-rich 1 (splicing factor 2, alternate splicing factor) | 0.412 | 0.0068863 |
| 1433936_at   | 0610010E21Rik | RIKEN cDNA 0610010E21 gene                                                                        | 0.412 | 0.0025611 |
| 1417657_s_at | Dnajc2        | DnaJ (Hsp40) homolog, subfamily C, member 2                                                       | 0.413 | 0.0009516 |
| 1448947_at   | 2810004N23Rik | RIKEN cDNA 2810004N23 gene                                                                        | 0.413 | 0.0003203 |
| 1431593_a_at | Tsen34        | tRNA splicing endonuclease 34 homolog (S. cerevisiae)                                             | 0.413 | 0.0008198 |
| 1423531_a_at | Hnrnpa1       | heterogeneous nuclear ribonucleoprotein A1                                                        | 0.413 | 0.00035   |
| 1436615_a_at | Otc           | ornithine transcarbamylase                                                                        | 0.413 | 0.0008279 |
| 1417399_at   | Gas6          | growth arrest specific 6                                                                          | 0.414 | 0.003972  |
| 1440037_at   | Pbx1          | pre B-cell leukemia transcription factor 1                                                        | 0.414 | 0.0119733 |
| 1420479_a_at | Nap111        | nucleosome assembly protein 1-like 1                                                              | 0.414 | 0.0487733 |
| 1440925_at   | NA            | NA                                                                                                | 0.414 | 0.0038195 |
| 1428291_at   | Exosc8        | exosome component 8                                                                               | 0.414 | 0.001941  |
| 1450873_at   | Gtpbp4        | GTP binding protein 4                                                                             | 0.415 | 0.0006336 |
| 1449194_at   | Mrps25        | mitochondrial ribosomal protein S25                                                               | 0.415 | 0.0016402 |
| 1417703_at   | Pvrl2         | poliovirus receptor-related 2                                                                     | 0.415 | 0.0025115 |

|              |               |                                                                                     |       |           |
|--------------|---------------|-------------------------------------------------------------------------------------|-------|-----------|
| 1455578_x_at | Rpl41         | ribosomal protein L41                                                               | 0.415 | 0.0004443 |
| 1436816_at   | Nup133        | nucleoporin 133                                                                     | 0.415 | 0.0009743 |
| 1420911_a_at | Mfge8         | milk fat globule-EGF factor 8 protein                                               | 0.415 | 0.0006184 |
| 1421817_at   | Gsr           | glutathione reductase                                                               | 0.415 | 0.0039087 |
| 1438092_x_at | H2afz         | H2A histone family, member Z                                                        | 0.415 | 0.0004275 |
| 1456655_at   | NA            | NA                                                                                  | 0.416 | 0.0027437 |
| 1456315_a_at | Ptpla         | protein tyrosine phosphatase-like (proline instead of catalytic arginine), member a | 0.416 | 0.0032682 |
| 1451259_at   | Rexo2         | REX2, RNA exonuclease 2 homolog (S. cerevisiae)                                     | 0.416 | 0.0029077 |
| 1436508_at   | 2410014A08Rik | RIKEN cDNA 2410014A08 gene                                                          | 0.416 | 0.0007559 |
| 1416470_a_at | Rpn1          | ribophorin I                                                                        | 0.416 | 0.0015272 |
| 1418719_at   | 2410004L22Rik | RIKEN cDNA 2410004L22 gene                                                          | 0.416 | 0.0047538 |
| 1419363_a_at | Mrpl35        | mitochondrial ribosomal protein L35                                                 | 0.416 | 0.0003674 |
| 1456702_x_at | Mat2a         | methionine adenosyltransferase II, alpha                                            | 0.416 | 0.0015377 |
| 1443491_at   | NA            | NA                                                                                  | 0.417 | 0.0049149 |
| 1426705_s_at | Iars          | isoleucine-tRNA synthetase                                                          | 0.417 | 0.0015053 |
| 1423708_a_at | Farsb         | phenylalanyl-tRNA synthetase, beta subunit                                          | 0.417 | 0.0019741 |
| 1439428_x_at | Gmcs          | GDP-mannose 4, 6-dehydratase                                                        | 0.417 | 0.0099505 |

|              |               |                                                               |       |           |
|--------------|---------------|---------------------------------------------------------------|-------|-----------|
| 1428429_at   | Rgmb          | RGM domain family, member B                                   | 0.417 | 0.0055702 |
| 1417029_a_at | Trim2         | tripartite motif-containing 2                                 | 0.418 | 0.00318   |
| 1437851_x_at | Rnps1         | ribonucleic acid binding protein S1                           | 0.418 | 0.0005545 |
| 1416052_at   | Prps1         | phosphoribosyl pyrophosphate synthetase 1                     | 0.418 | 0.0034256 |
| 1430020_x_at | Hnrnpa1       | heterogeneous nuclear ribonucleoprotein A1                    | 0.418 | 0.0004377 |
| 1428553_at   | Glrx5         | glutaredoxin 5 homolog (S. cerevisiae)                        | 0.418 | 0.0005379 |
| 1448135_at   | Atf4          | activating transcription factor 4                             | 0.418 | 0.0004797 |
| 1416940_at   | Ppif          | peptidylprolyl isomerase F (cyclophilin F)                    | 0.418 | 0.0028713 |
| 1459497_at   | NA            | NA                                                            | 0.418 | 0.0027963 |
| 1455417_at   | Kcnj11        | potassium inwardly rectifying channel, subfamily J, member 11 | 0.419 | 0.0072299 |
| 1442824_at   | 8030497I03Rik | RIKEN cDNA 8030497I03 gene                                    | 0.419 | 0.0021422 |
| 1416276_a_at | Rps4x         | ribosomal protein S4, X-linked                                | 0.419 | 0.0003732 |
| 1423206_s_at | 2310003F16Rik | RIKEN cDNA 2310003F16 gene                                    | 0.419 | 0.0003535 |
| 1448480_at   | Nip7          | nuclear import 7 homolog (S. cerevisiae)                      | 0.419 | 0.0004343 |
| 1433547_s_at | Nudcd1        | NudC domain containing 1                                      | 0.420 | 0.0008143 |
| 1454781_x_at | Commd9        | COMM domain containing 9                                      | 0.420 | 0.003266  |



|              |               |                                                                      |       |           |
|--------------|---------------|----------------------------------------------------------------------|-------|-----------|
| 1416095_x_at | 1110005A23Rik | RIKEN cDNA 1110005A23 gene                                           | 0.420 | 0.000469  |
| 1438091_a_at | H2afz         | H2A histone family, member Z                                         | 0.420 | 0.0008885 |
| 1418504_at   | Hspa9         | heat shock protein 9                                                 | 0.421 | 0.003174  |
| 1416988_at   | Msh2          | mutS homolog 2 (E. coli)                                             | 0.421 | 0.0107176 |
| 1418229_s_at | Nfu1          | NFU1 iron-sulfur cluster scaffold homolog (S. cerevisiae)            | 0.422 | 0.0007124 |
| 1433983_at   | Cnksr3        | Cnksr family member 3                                                | 0.422 | 0.0004972 |
| 1428585_at   | Actn1         | actinin, alpha 1                                                     | 0.422 | 0.0006509 |
| 1416835_s_at | Amd1          | S-adenosylmethionine decarboxylase 1                                 | 0.422 | 0.0008498 |
| 1449118_at   | Dbt           | dihydrolipoamide branched chain transacylase E2                      | 0.422 | 0.0015355 |
| 1454751_at   | G430022H21Rik | RIKEN cDNA G430022H21 gene                                           | 0.422 | 0.0029436 |
| 1441081_a_at | 1110038B12Rik | RIKEN cDNA 1110038B12 gene                                           | 0.422 | 0.0106703 |
| 1419273_at   | C80913        | expressed sequence C80913                                            | 0.422 | 0.0057452 |
| 1434668_at   | Nucks1        | nuclear casein kinase and cyclin-dependent kinase substrate 1        | 0.423 | 0.0010851 |
| 1453727_at   | Esf1          | ESF1, nucleolar pre-rRNA processing protein, homolog (S. cerevisiae) | 0.423 | 0.0111111 |
| 1459836_x_at | Sf3b2         | splicing factor 3b, subunit 2                                        | 0.423 | 0.005342  |

|              |          |                                                                            |       |           |
|--------------|----------|----------------------------------------------------------------------------|-------|-----------|
| 1436884_x_at | Ewsr1    | Ewing sarcoma<br>breakpoint region<br>1                                    | 0.423 | 0.0030822 |
| 1426402_at   | Syncrip  | synaptotagmin<br>binding,<br>cytoplasmic RNA<br>interacting protein        | 0.423 | 0.0022824 |
| 1448809_at   | Cse1l    | chromosome<br>segregation 1-like<br>( <i>S. cerevisiae</i> )               | 0.423 | 0.0025485 |
| 1417647_at   | Snx5     | sorting nexin 5                                                            | 0.423 | 0.0004193 |
| 1437327_x_at | Enoph1   | enolase-<br>phosphatase 1                                                  | 0.423 | 0.0007196 |
| 1442214_at   | NA       | NA                                                                         | 0.424 | 0.0034759 |
| 1434744_at   | Yrdc     | yrdC domain<br>containing ( <i>E.coli</i> )                                | 0.424 | 0.0006454 |
| 1424697_at   | Dtwd1    | DTW domain<br>containing 1                                                 | 0.424 | 0.0022508 |
| 1439371_x_at | Timm44   | translocase of<br>inner<br>mitochondrial<br>membrane 44                    | 0.424 | 0.0007513 |
| 1428551_at   | Trmt11   | tRNA<br>methyltransferase<br>11 homolog ( <i>S.</i><br><i>cerevisiae</i> ) | 0.424 | 0.0107161 |
| 1434211_at   | Sh3bgrl2 | SH3 domain<br>binding glutamic<br>acid-rich protein<br>like 2              | 0.424 | 0.0222333 |
| 1416726_s_at | Ube2s    | ubiquitin-<br>conjugating<br>enzyme E2S                                    | 0.424 | 0.0005987 |
| 1448212_at   | Psmg2    | proteasome<br>(prosome,<br>macropain)<br>assembly<br>chaperone 2           | 0.424 | 0.0006398 |

|              |               |                                                                        |       |           |
|--------------|---------------|------------------------------------------------------------------------|-------|-----------|
| 1438750_at   | Atrx          | alpha thalassemia/mental retardation syndrome X-linked homolog (human) | 0.424 | 0.0154909 |
| 1450943_at   | Magohb        | mago-nashi homolog B (Drosophila)                                      | 0.425 | 0.000552  |
| 1423157_at   | Gnpnat1       | glucosamine-phosphate N-acetyltransferase 1                            | 0.425 | 0.0009083 |
| 1430717_at   | 4930403C10Rik | RIKEN cDNA 4930403C10 gene                                             | 0.425 | 0.0021331 |
| 1437210_a_at | Brd2          | bromodomain containing 2                                               | 0.425 | 0.0070945 |
| 1437593_x_at | Api5          | apoptosis inhibitor 5                                                  | 0.425 | 0.0028724 |
| 1433913_at   | C80913        | expressed sequence C80913                                              | 0.425 | 0.0005864 |
| 1460175_at   | Rps23         | ribosomal protein S23                                                  | 0.426 | 0.0005136 |
| 1419472_s_at | Nudc          | nuclear distribution gene C homolog (Aspergillus)                      | 0.426 | 0.0006948 |
| 1430053_a_at | Ola1          | Obg-like ATPase 1                                                      | 0.426 | 0.0004701 |
| 1437811_x_at | NA            | NA                                                                     | 0.426 | 0.0006715 |
| 1427661_a_at | Tssc4         | tumor-suppressing subchromosomal transferable fragment 4               | 0.426 | 0.0272924 |
| 1435413_x_at | 2700060E02Rik | RIKEN cDNA 2700060E02 gene                                             | 0.426 | 0.0005849 |
| 1426555_at   | Scpep1        | serine carboxypeptidase 1                                              | 0.426 | 0.0019071 |
| 1424802_a_at | 3300001P08Rik | RIKEN cDNA 3300001P08 gene                                             | 0.426 | 0.0005385 |
| 1439453_x_at | Rnaseh2c      | ribonuclease H2, subunit C                                             | 0.426 | 0.0006598 |

|              |               |                                                                                             |       |           |
|--------------|---------------|---------------------------------------------------------------------------------------------|-------|-----------|
| 1437192_x_at | Mt2           | metallothionein 2                                                                           | 0.426 | 0.0015947 |
| 1430125_s_at | Pqlc1         | PQ loop repeat containing 1                                                                 | 0.426 | 0.0046651 |
| 1419912_s_at | Strap         | serine/threonine kinase receptor associated protein                                         | 0.426 | 0.0004647 |
| 1429581_at   | Acad9         | acyl-Coenzyme A dehydrogenase family, member 9                                              | 0.427 | 0.0021522 |
| 1430147_a_at | Josd3         | Josephin domain containing 3                                                                | 0.427 | 0.0023405 |
| 1432650_at   | 2510019K15Rik | RIKEN cDNA 2510019K15 gene                                                                  | 0.427 | 0.002503  |
| 1453848_s_at | Zbed3         | zinc finger, BED domain containing 3                                                        | 0.427 | 0.0356991 |
| 1417619_at   | Gadd45gip1    | growth arrest and DNA-damage-inducible, gamma interacting protein 1                         | 0.427 | 0.0006353 |
| 1451254_at   | Ikbpap        | inhibitor of kappa light polypeptide enhancer in B-cells, kinase complex-associated protein | 0.427 | 0.0009159 |
| 1424465_at   | Ccdc58        | coiled-coil domain containing 58                                                            | 0.427 | 0.0015051 |
| 1424107_at   | Kif18a        | kinesin family member 18A                                                                   | 0.428 | 0.0185236 |
| 1427903_at   | Phpt1         | phosphohistidine phosphatase 1                                                              | 0.428 | 0.0036752 |
| 1452614_at   | Bcl2l15       | BCL2-like 15                                                                                | 0.428 | 0.0018548 |
| 1421664_a_at | Styx          | serine/threonine/tyrosine interaction protein                                               | 0.428 | 0.0007471 |

|                     |                   |                                                                    |       |           |
|---------------------|-------------------|--------------------------------------------------------------------|-------|-----------|
| 1434111_at          | LOC100048050      | similar to calcium-independent alpha-latrotoxin receptor homolog 2 | 0.429 | 0.0069767 |
| 1424243_at          | Rwdd4a            | RWD domain containing 4A                                           | 0.429 | 0.0021509 |
| AFFX-r2-Bs-phe-3_at | NA                | NA                                                                 | 0.429 | 0.0374571 |
| 1416544_at          | Ezh2              | enhancer of zeste homolog 2 (Drosophila)                           | 0.429 | 0.0005226 |
| 1459861_s_at        | OTTMUSG0000006609 | predicted gene, OTTMUSG0000006609                                  | 0.430 | 0.0014945 |
| 1451348_at          | Depdc6            | DEP domain containing 6                                            | 0.430 | 0.0037219 |
| 1416202_at          | Phb2              | prohibitin 2                                                       | 0.430 | 0.0033061 |
| 1415973_at          | Marcks            | myristoylated alanine rich protein kinase C substrate              | 0.430 | 0.0012496 |
| 1423767_at          | Dpy30             | dpy-30 homolog (C. elegans)                                        | 0.430 | 0.000476  |
| 1415820_x_at        | Nono              | non-POU-domain-containing, octamer binding protein                 | 0.431 | 0.0005141 |
| 1456308_x_at        | Trim28            | tripartite motif-containing 28                                     | 0.431 | 0.0004976 |
| AFFX-LysX-3_at      | NA                | NA                                                                 | 0.431 | 0.0359549 |
| 1449661_at          | Suz12             | suppressor of zeste 12 homolog (Drosophila)                        | 0.431 | 0.0339465 |
| 1453928_a_at        | Ssb               | Sjogren syndrome antigen B                                         | 0.432 | 0.0053998 |
| 1415926_at          | Nup62             | nucleoporin 62                                                     | 0.432 | 0.0014006 |
| 1437622_x_at        | Mrpl28            | mitochondrial ribosomal protein L28                                | 0.432 | 0.0010227 |

|                |            |                                                                                                   |       |           |
|----------------|------------|---------------------------------------------------------------------------------------------------|-------|-----------|
| 1440120_at     | Gnb2l1     | guanine nucleotide binding protein (G protein), beta polypeptide 2 like 1                         | 0.432 | 0.0080219 |
| 1417053_at     | Phb        | prohibitin                                                                                        | 0.432 | 0.0057617 |
| 1420488_at     | Mrps14     | mitochondrial ribosomal protein S14                                                               | 0.433 | 0.0061968 |
| 1448344_at     | Rps12      | ribosomal protein S12                                                                             | 0.433 | 0.0004735 |
| 1449935_a_at   | Dnaja3     | DnaJ (Hsp40) homolog, subfamily A, member 3                                                       | 0.433 | 0.003827  |
| 1417081_a_at   | Syngn2     | synaptogyrin 2                                                                                    | 0.433 | 0.0006012 |
| 1454214_a_at   | Znhit6     | zinc finger, HIT type 6                                                                           | 0.433 | 0.0035382 |
| 1435856_x_at   | Smarca1    | SWI/SNF related, matrix associated, actin dependent regulator of chromatin, subfamily b, member 1 | 0.433 | 0.0054183 |
| 1435380_at     | Cox10      | COX10 homolog, cytochrome c oxidase assembly protein, heme A: farnesyltransferase (yeast)         | 0.433 | 0.0011883 |
| 1426788_a_at   | Ssrp1      | structure specific recognition protein 1                                                          | 0.434 | 0.0006002 |
| AFFX-ThrX-3_at | NA         | NA                                                                                                | 0.434 | 0.0438893 |
| 1451166_a_at   | Ccdc101    | coiled-coil domain containing 101                                                                 | 0.434 | 0.0033891 |
| 1434687_at     | C730026J16 | hypothetical protein C730026J16                                                                   | 0.434 | 0.0119678 |

|              |               |                                                          |       |           |
|--------------|---------------|----------------------------------------------------------|-------|-----------|
| 1426155_a_at | Osr2          | odd-skipped related 2 (Drosophila)                       | 0.434 | 0.0069548 |
| 1447174_at   | NA            | NA                                                       | 0.434 | 0.0312156 |
| 1452774_at   | Hnrnpa3       | heterogeneous nuclear ribonucleoprotein A3               | 0.434 | 0.0008263 |
| 1419824_a_at | Aasdh         | aminoadipate-semialdehyde dehydrogenase                  | 0.434 | 0.0011221 |
| 1435521_at   | Msi2          | Musashi homolog 2 (Drosophila)                           | 0.435 | 0.0016276 |
| 1447676_x_at | S100a16       | S100 calcium binding protein A16                         | 0.435 | 0.0055006 |
| 1423512_at   | AW209491      | expressed sequence AW209491                              | 0.435 | 0.0132517 |
| 1454681_at   | Rbm35a        | RNA binding motif protein 35A                            | 0.435 | 0.0016234 |
| 1447537_at   | 1500032P08Rik | RIKEN cDNA 1500032P08 gene                               | 0.435 | 0.0210933 |
| 1429558_a_at | Larp7         | La ribonucleoprotein domain family, member 7             | 0.435 | 0.0013121 |
| 1416335_at   | Mif           | macrophage migration inhibitory factor                   | 0.435 | 0.0034156 |
| 1416404_s_at | Rps16         | ribosomal protein S16                                    | 0.435 | 0.0005362 |
| 1416669_s_at | Naca          | nascent polypeptide-associated complex alpha polypeptide | 0.436 | 0.0006765 |
| 1450084_s_at | Ivns1abp      | influenza virus NS1A binding protein                     | 0.436 | 0.0009399 |
| 1428100_at   | Sfrs1         | splicing factor, arginine/serine-rich 1 (ASF/SF2)        | 0.436 | 0.0008865 |

|              |         |                                                                |       |           |
|--------------|---------|----------------------------------------------------------------|-------|-----------|
| 1423723_s_at | Tardbp  | TAR DNA binding protein                                        | 0.436 | 0.0008366 |
| 1439012_a_at | Dck     | deoxycytidine kinase                                           | 0.436 | 0.0088384 |
| 1435725_x_at | Rpl12   | ribosomal protein L12                                          | 0.436 | 0.0005232 |
| 1435178_x_at | Anapc5  | anaphase-promoting complex subunit 5                           | 0.437 | 0.0008763 |
| 1434420_x_at | Tomm22  | translocase of outer mitochondrial membrane 22 homolog (yeast) | 0.437 | 0.004677  |
| 1448563_at   | Phb     | prohibitin                                                     | 0.437 | 0.0020922 |
| 1417274_at   | Snrpa   | small nuclear ribonucleoprotein polypeptide A                  | 0.437 | 0.0043603 |
| 1429490_at   | Rif1    | Rap1 interacting factor 1 homolog (yeast)                      | 0.438 | 0.018591  |
| 1417629_at   | Prodh   | proline dehydrogenase                                          | 0.438 | 0.012607  |
| 1426659_a_at | Rpl23a  | ribosomal protein L23a                                         | 0.438 | 0.0004975 |
| 1438561_x_at | Tmem180 | transmembrane protein 180                                      | 0.438 | 0.0007122 |
| 1449019_at   | Akap1   | A kinase (PRKA) anchor protein 1                               | 0.438 | 0.0047917 |
| 1422524_at   | Abcb6   | ATP-binding cassette, sub-family B (MDR/TAP), member 6         | 0.439 | 0.0046118 |
| 1429056_at   | Narg1l  | NMDA receptor regulated 1-like                                 | 0.439 | 0.0036375 |



|              |               |                                                                                               |       |           |
|--------------|---------------|-----------------------------------------------------------------------------------------------|-------|-----------|
| 1420037_at   | Atp5a1        | ATP synthase, H <sup>+</sup> transporting, mitochondrial F1 complex, alpha subunit, isoform 1 | 0.439 | 0.0050695 |
| 1428529_at   | 2810026P18Rik | RIKEN cDNA 2810026P18 gene                                                                    | 0.439 | 0.0008971 |
| 1451175_at   | Spcs3         | signal peptidase complex subunit 3 homolog (S. cerevisiae)                                    | 0.439 | 0.002035  |
| 1418777_at   | Ccl25         | chemokine (C-C motif) ligand 25                                                               | 0.439 | 0.0325523 |
| 1456738_s_at | Brp16         | brain protein 16                                                                              | 0.439 | 0.0009665 |
| 1423317_at   | 3110001D03Rik | RIKEN cDNA 3110001D03 gene                                                                    | 0.440 | 0.0012038 |
| 1417354_at   | Sil1          | endoplasmic reticulum chaperone SIL1 homolog (S. cerevisiae)                                  | 0.440 | 0.0028008 |
| 1426389_at   | Camk1d        | calcium/calmodulin-dependent protein kinase ID                                                | 0.440 | 0.0027288 |
| 1449161_at   | Edn2          | endothelin 2                                                                                  | 0.440 | 0.0214569 |
| 1417615_a_at | Rpl11         | ribosomal protein L11                                                                         | 0.440 | 0.0007638 |
| 1437706_x_at | Rps14         | ribosomal protein S14                                                                         | 0.440 | 0.0007219 |
| 1456717_at   | NA            | NA                                                                                            | 0.441 | 0.0040172 |
| 1448126_at   | Fam60a        | family with sequence similarity 60, member A                                                  | 0.441 | 0.0017198 |
| 1433822_x_at | Anapc5        | anaphase-promoting complex subunit 5                                                          | 0.441 | 0.0038253 |
| 1416890_at   | Wdr74         | WD repeat domain 74                                                                           | 0.441 | 0.0012351 |

|              |        |                                                                     |       |           |
|--------------|--------|---------------------------------------------------------------------|-------|-----------|
| 1456695_x_at | Anapc5 | anaphase-promoting complex subunit 5                                | 0.441 | 0.0009014 |
| 1455800_x_at | Samm50 | sorting and assembly machinery component 50 homolog (S. cerevisiae) | 0.441 | 0.0014357 |
| 1460547_a_at | Hnrnpk | heterogeneous nuclear ribonucleoprotein K                           | 0.441 | 0.0011997 |
| 1428234_at   | Cpsf6  | cleavage and polyadenylation specific factor 6                      | 0.441 | 0.0054888 |
| 1427441_a_at | Suclg2 | succinate-Coenzyme A ligase, GDP-forming, beta subunit              | 0.441 | 0.0018013 |
| 1435341_at   | Ppig   | peptidyl-prolyl isomerase G (cyclophilin G)                         | 0.441 | 0.0081477 |
| 1455900_x_at | Tgm2   | transglutaminase 2, C polypeptide                                   | 0.441 | 0.005465  |
| 1452011_a_at | Uxs1   | UDP-glucuronate decarboxylase 1                                     | 0.442 | 0.0047349 |
| 1416393_at   | Emg1   | EMG1 nucleolar protein homolog (S. cerevisiae)                      | 0.442 | 0.0009055 |
| 1434216_a_at | Nudt19 | nudix (nucleoside diphosphate linked moiety X)-type motif 19        | 0.442 | 0.0070872 |
| 1424110_a_at | Nme1   | non-metastatic cells 1, protein (NM23A) expressed in                | 0.442 | 0.0013662 |

|              |               |                                                  |       |           |
|--------------|---------------|--------------------------------------------------|-------|-----------|
| 1418527_a_at | Fusip1        | FUS interacting protein (serine-arginine rich) 1 | 0.442 | 0.0009548 |
| 1422653_at   | Cep70         | centrosomal protein 70                           | 0.442 | 0.0032428 |
| 1442511_at   | Ipo7          | importin 7                                       | 0.443 | 0.0153314 |
| 1437288_at   | Impad1        | inositol monophosphatase domain containing 1     | 0.443 | 0.0045778 |
| 1428233_at   | Cpsf6         | cleavage and polyadenylation specific factor 6   | 0.443 | 0.0009366 |
| 1419461_at   | Rpp14         | ribonuclease P 14 subunit (human)                | 0.443 | 0.000612  |
| 1423277_at   | Ptpkr         | protein tyrosine phosphatase, receptor type, K   | 0.443 | 0.0038944 |
| 1437193_s_at | Snrpb         | small nuclear ribonucleoprotein B                | 0.443 | 0.0007808 |
| 1416892_s_at | 3110001A13Rik | RIKEN cDNA 3110001A13 gene                       | 0.444 | 0.0015606 |
| 1449121_at   | Fusip1        | FUS interacting protein (serine-arginine rich) 1 | 0.444 | 0.0005781 |
| 1417264_at   | Coq5          | coenzyme Q5 homolog, methyltransferase (yeast)   | 0.444 | 0.0009846 |
| 1426407_at   | Cugbp1        | CUG triplet repeat, RNA binding protein 1        | 0.444 | 0.0084617 |
| 1417517_at   | Plagl2        | pleiomorphic adenoma gene-like 2                 | 0.444 | 0.0138583 |
| 1420984_at   | Pctp          | phosphatidylcholine transfer protein             | 0.444 | 0.000695  |

|              |                |                                                                       |       |           |
|--------------|----------------|-----------------------------------------------------------------------|-------|-----------|
| 1438156_x_at | Cpt1a          | carnitine palmitoyltransferase 1a, liver                              | 0.444 | 0.0009148 |
| 1424161_at   | Ddx27          | DEAD (Asp-Glu-Ala-Asp) box polypeptide 27                             | 0.444 | 0.0020807 |
| 1435509_x_at | LOC100047490   | similar to putative oral cancer suppressor                            | 0.444 | 0.0006118 |
| 1433960_at   | Isg20l2        | interferon stimulated exonuclease gene 20-like 2                      | 0.445 | 0.0022274 |
| 1447046_at   | NA             | NA                                                                    | 0.445 | 0.0027632 |
| 1416319_at   | Adk            | adenosine kinase                                                      | 0.445 | 0.0056331 |
| 1428734_at   | 3200002M19 Rik | RIKEN cDNA 3200002M19 gene                                            | 0.445 | 0.0070788 |
| 1450646_at   | Cyp51          | cytochrome P450, family 51                                            | 0.445 | 0.0022321 |
| 1452923_at   | Ndufaf2        | NADH dehydrogenase (ubiquinone) 1 alpha subcomplex, assembly factor 2 | 0.445 | 0.0012052 |
| 1449582_at   | Cdx1           | caudal type homeo box 1                                               | 0.445 | 0.0071921 |
| 1452198_at   | Fbxl10         | F-box and leucine rich repeat protein 10                              | 0.445 | 0.0059552 |
| 1428153_at   | Mrps10         | mitochondrial ribosomal protein S10                                   | 0.445 | 0.001791  |
| 1415775_at   | Rbbp7          | retinoblastoma binding protein 7                                      | 0.445 | 0.0009512 |
| 1456383_at   | Rsl1d1         | ribosomal L1 domain containing 1                                      | 0.445 | 0.000661  |
| 1458355_x_at | Wdr92          | WD repeat domain 92                                                   | 0.446 | 0.003364  |
| 1427126_at   | Hspa1b         | heat shock protein 1B                                                 | 0.446 | 0.0241758 |

|              |                   |                                                                                                   |       |           |
|--------------|-------------------|---------------------------------------------------------------------------------------------------|-------|-----------|
| 1448400_a_at | Smarcd2           | SWI/SNF related, matrix associated, actin dependent regulator of chromatin, subfamily d, member 2 | 0.446 | 0.0022944 |
| 1452354_at   | 2810459M11<br>Rik | RIKEN cDNA 2810459M11 gene                                                                        | 0.446 | 0.0028562 |
| 1460314_s_at | Hist2h3c1         | histone cluster 2, H3c1                                                                           | 0.446 | 0.0082389 |
| 1417681_at   | Nudt21            | nudix (nucleoside diphosphate linked moiety X)-type motif 21                                      | 0.446 | 0.0012264 |
| 1426749_at   | Prmt3             | protein arginine N-methyltransferase 3                                                            | 0.446 | 0.0019149 |
| 1437032_x_at | Rbm14             | RNA binding motif protein 14                                                                      | 0.447 | 0.0034598 |
| 1449120_a_at | Pcm1              | pericentriolar material 1                                                                         | 0.447 | 0.0250877 |
| 1427197_at   | Atr               | ataxia telangiectasia and Rad3 related                                                            | 0.447 | 0.0065    |
| 1417135_at   | Srpk2             | serine/arginine-rich protein specific kinase 2                                                    | 0.447 | 0.0171576 |
| 1453380_a_at | Xrcc6bp1          | XRCC6 binding protein 1                                                                           | 0.447 | 0.0032691 |
| 1416217_a_at | Rpl37a            | ribosomal protein L37a                                                                            | 0.447 | 0.0006456 |
| 1415945_at   | Mcm5              | minichromosome maintenance deficient 5, cell division cycle 46 ( <i>S. cerevisiae</i> )           | 0.447 | 0.0043634 |
| 1415950_a_at | Pebp1             | phosphatidylethanolamine binding protein 1                                                        | 0.447 | 0.0014069 |

|              |               |                                                        |       |           |
|--------------|---------------|--------------------------------------------------------|-------|-----------|
| 1416031_s_at | Mcm7          | minichromosome maintenance deficient 7 (S. cerevisiae) | 0.448 | 0.0014747 |
| 1425177_at   | Shmt1         | serine hydroxymethyltransferase 1 (soluble)            | 0.448 | 0.0236552 |
| 1429270_a_at | Syce2         | synaptonemal complex central element protein 2         | 0.448 | 0.0027812 |
| 1436586_x_at | Rps14         | ribosomal protein S14                                  | 0.448 | 0.0007766 |
| 1416256_a_at | Tubb5         | tubulin, beta 5                                        | 0.448 | 0.0008288 |
| 1437250_at   | Mreg          | melanoregulin                                          | 0.448 | 0.0130527 |
| 1417718_at   | Eif3g         | eukaryotic translation initiation factor 3, subunit G  | 0.449 | 0.0019258 |
| 1438267_x_at | Rnps1         | ribonucleic acid binding protein S1                    | 0.449 | 0.000648  |
| 1417608_a_at | Rpl13a        | ribosomal protein L13a                                 | 0.449 | 0.0006856 |
| 1423740_a_at | Rbm10         | RNA binding motif protein 10                           | 0.449 | 0.0012135 |
| 1437074_at   | Snx5          | sorting nexin 5                                        | 0.449 | 0.0098805 |
| 1456028_x_at | Marcks        | myristoylated alanine rich protein kinase C substrate  | 0.449 | 0.0071006 |
| 1418521_a_at | Mtx1          | metaxin 1                                              | 0.449 | 0.0009587 |
| 1438159_x_at | Ndufv2        | NADH dehydrogenase (ubiquinone) flavoprotein 2         | 0.449 | 0.0007382 |
| 1433898_at   | NA            | NA                                                     | 0.449 | 0.0260549 |
| 1439678_at   | NA            | NA                                                     | 0.449 | 0.0057394 |
| 1431521_at   | 5033428B15R1k | RIKEN cDNA 5033428B15 gene                             | 0.450 | 0.0173106 |

|              |             |                                                                     |       |           |
|--------------|-------------|---------------------------------------------------------------------|-------|-----------|
| 1424980_s_at | Aph1a       | anterior pharynx defective 1a homolog (C. elegans)                  | 0.450 | 0.0058866 |
| 1416065_a_at | Ankrd10     | ankyrin repeat domain 10                                            | 0.450 | 0.0018741 |
| 1437391_x_at | Mrpl44      | mitochondrial ribosomal protein L44                                 | 0.450 | 0.0013915 |
| 1449749_s_at | Tfb1m       | transcription factor B1, mitochondrial                              | 0.451 | 0.0041743 |
| 1423079_a_at | Tomm20      | translocase of outer mitochondrial membrane 20 homolog (yeast)      | 0.451 | 0.0016161 |
| 1460323_at   | Tars        | threonyl-tRNA synthetase                                            | 0.451 | 0.0015179 |
| 1424468_s_at | Phldb1      | pleckstrin homology-like domain, family B, member 1                 | 0.451 | 0.0011977 |
| 1429710_at   | Styx        | serine/threonine/tyrosine interaction protein                       | 0.451 | 0.0010734 |
| 1438368_a_at | Matr3       | matrin 3                                                            | 0.452 | 0.0075384 |
| 1416868_at   | Cdkn2c      | cyclin-dependent kinase inhibitor 2C (p18, inhibits CDK4)           | 0.452 | 0.0031708 |
| 1416783_at   | Tac1        | tachykinin 1                                                        | 0.452 | 0.0015679 |
| 1430978_at   | Rps25       | ribosomal protein S25                                               | 0.452 | 0.0052711 |
| 1423211_at   | Nola3       | nucleolar protein family A, member 3                                | 0.452 | 0.0025888 |
| 1426932_at   | D19Bwg1357e | DNA segment, Chr 19, Brigham & Women@#\$%&s Genetics 1357 expressed | 0.452 | 0.0040714 |

|                     |         |                                                                                          |       |           |
|---------------------|---------|------------------------------------------------------------------------------------------|-------|-----------|
| 1439058_at          | Sfpq    | splicing factor proline/glutamine rich (polypyrimidine tract binding protein associated) | 0.453 | 0.019427  |
| 1417239_at          | Cetn3   | centrin 3                                                                                | 0.453 | 0.0007205 |
| 1437133_x_at        | Akr1b3  | aldo-keto reductase family 1, member B3 (aldose reductase)                               | 0.453 | 0.0050423 |
| 1448130_at          | Fdft1   | farnesyl diphosphate farnesyl transferase 1                                              | 0.453 | 0.0037529 |
| 1453206_at          | Acad9   | acyl-Coenzyme A dehydrogenase family, member 9                                           | 0.453 | 0.0075208 |
| 1437565_a_at        | Gnl2    | guanine nucleotide binding protein-like 2 (nucleolar)                                    | 0.453 | 0.0046221 |
| 1422533_at          | Cyp51   | cytochrome P450, family 51                                                               | 0.453 | 0.0035569 |
| 1438510_a_at        | Hars    | histidyl-tRNA synthetase                                                                 | 0.453 | 0.0008152 |
| 1456632_at          | Bcl11a  | B-cell CLL/lymphoma 11A (zinc finger protein)                                            | 0.453 | 0.006595  |
| 1452241_at          | Topbp1  | topoisomerase (DNA) II binding protein 1                                                 | 0.453 | 0.0017701 |
| 1455840_at          | Rapgef5 | Rap guanine nucleotide exchange factor (GEF) 5                                           | 0.453 | 0.006159  |
| AFFX-r2-Bs-dap-M_at | NA      | NA                                                                                       | 0.454 | 0.0417939 |



|              |               |                                                                        |       |           |
|--------------|---------------|------------------------------------------------------------------------|-------|-----------|
| 1420129_s_at | D10Wsu52e     | DNA segment, Chr 10, Wayne State University 52, expressed              | 0.454 | 0.0007509 |
| 1444472_at   | NA            | NA                                                                     | 0.454 | 0.0077466 |
| 1455095_at   | Hist2h2be     | histone cluster 2, H2be                                                | 0.454 | 0.003848  |
| 1455643_s_at | Tsr1          | TSR1, 20S rRNA accumulation, homolog (yeast)                           | 0.454 | 0.0043224 |
| 1436760_a_at | Rps8          | ribosomal protein S8                                                   | 0.454 | 0.0007908 |
| 1448808_a_at | Nme2          | non-metastatic cells 2, protein (NM23B) expressed in                   | 0.454 | 0.0036837 |
| 1416569_at   | Actl6a        | actin-like 6A                                                          | 0.454 | 0.0061442 |
| 1424573_at   | Tmed5         | transmembrane emp24 protein transport domain containing 5              | 0.454 | 0.0024177 |
| 1438018_at   | Hook1         | hook homolog 1 (Drosophila)                                            | 0.454 | 0.0024248 |
| 1415716_a_at | Rps27         | ribosomal protein S27                                                  | 0.455 | 0.0035505 |
| 1428475_at   | 1190005P17Rik | RIKEN cDNA 1190005P17 gene                                             | 0.455 | 0.0013486 |
| 1433567_at   | Gmps          | guanine monphosphate synthetase                                        | 0.455 | 0.0026549 |
| 1449945_at   | Ppargc1b      | peroxisome proliferative activated receptor, gamma, coactivator 1 beta | 0.455 | 0.0032407 |
| 1441870_s_at | Pkd2          | polycystic kidney disease 2                                            | 0.455 | 0.0042894 |

|              |         |                                                                                 |       |           |
|--------------|---------|---------------------------------------------------------------------------------|-------|-----------|
| 1442793_s_at | Tbrg4   | transforming growth factor beta regulated gene 4                                | 0.455 | 0.0009096 |
| 1415692_s_at | Canx    | calnexin                                                                        | 0.455 | 0.0209718 |
| 1451090_a_at | Eif2s3x | eukaryotic translation initiation factor 2, subunit 3, structural gene X-linked | 0.456 | 0.0008237 |
| 1435843_x_at | Mrps9   | mitochondrial ribosomal protein S9                                              | 0.456 | 0.0042975 |
| 1425142_a_at | Hnrnpd  | heterogeneous nuclear ribonucleoprotein D                                       | 0.456 | 0.0008501 |
| 1456664_x_at | Hnrnpf  | heterogeneous nuclear ribonucleoprotein F                                       | 0.456 | 0.0040296 |
| 1442044_at   | NA      | NA                                                                              | 0.456 | 0.001526  |
| 1418289_at   | Nes     | nestin                                                                          | 0.456 | 0.007977  |
| 1455546_s_at | Sf3a2   | splicing factor 3a, subunit 2                                                   | 0.456 | 0.0042549 |
| 1438563_s_at | Mrps24  | mitochondrial ribosomal protein S24                                             | 0.456 | 0.0014393 |
| 1417352_s_at | Snrpa1  | small nuclear ribonucleoprotein polypeptide A@#\$%&                             | 0.457 | 0.0027617 |
| 1426163_x_at | Rpl7    | ribosomal protein L7                                                            | 0.457 | 0.0011439 |
| 1416284_at   | Mrpl28  | mitochondrial ribosomal protein L28                                             | 0.457 | 0.0014016 |
| 1420946_at   | Atrx    | alpha thalassemia/mental retardation syndrome X-linked homolog (human)          | 0.457 | 0.0164362 |
| 1418896_a_at | Rpn2    | ribophorin II                                                                   | 0.457 | 0.0077768 |

|              |               |                                                                                   |       |           |
|--------------|---------------|-----------------------------------------------------------------------------------|-------|-----------|
| 1448720_at   | Lrrc40        | leucine rich repeat containing 40                                                 | 0.457 | 0.0007787 |
| 1428853_at   | Ptch1         | patched homolog 1                                                                 | 0.458 | 0.0044331 |
| 1423291_s_at | Hyou1         | hypoxia up-regulated 1                                                            | 0.458 | 0.0013865 |
| 1425196_a_at | Hint2         | histidine triad nucleotide binding protein 2                                      | 0.458 | 0.0015378 |
| 1455174_at   | Rps19bp1      | ribosomal protein S19 binding protein 1                                           | 0.458 | 0.010754  |
| 1437413_x_at | Rps29         | ribosomal protein S29                                                             | 0.458 | 0.0007623 |
| 1420846_at   | Mrps2         | mitochondrial ribosomal protein S2                                                | 0.458 | 0.0042928 |
| 1426342_at   | Stt3b         | STT3, subunit of the oligosaccharyltransferase complex, homolog B (S. cerevisiae) | 0.458 | 0.0058958 |
| 1415888_at   | Hdgf          | hepatoma-derived growth factor                                                    | 0.459 | 0.001124  |
| 1447993_a_at | Snhg10        | small nucleolar RNA host gene (non-protein coding) 10                             | 0.459 | 0.0015778 |
| 1448513_a_at | Npc2          | Niemann Pick type C2                                                              | 0.459 | 0.0009041 |
| 1428029_a_at | H2afv         | H2A histone family, member V                                                      | 0.459 | 0.0015476 |
| 1443088_at   | 9930031P18Rik | RIKEN cDNA 9930031P18 gene                                                        | 0.459 | 0.0018057 |
| 1415914_at   | Hnrnpab       | heterogeneous nuclear ribonucleoprotein A/B                                       | 0.460 | 0.0016873 |
| 1437984_x_at | Bat1a         | HLA-B-associated transcript 1A                                                    | 0.460 | 0.0016811 |
| 1430038_at   | Gphn          | gephyrin                                                                          | 0.460 | 0.0149103 |

|              |                   |                                                               |       |           |
|--------------|-------------------|---------------------------------------------------------------|-------|-----------|
| 1417921_at   | 2610029G23<br>Rik | RIKEN cDNA<br>2610029G23<br>gene                              | 0.460 | 0.0008294 |
| 1448882_at   | Tmem93            | transmembrane<br>protein 93                                   | 0.460 | 0.0009707 |
| 1448704_s_at | H47               | histocompatibility<br>47                                      | 0.460 | 0.0009914 |
| 1438562_a_at | Ptpn2             | protein tyrosine<br>phosphatase, non<br>receptor type 2       | 0.460 | 0.0022772 |
| 1448157_s_at | Rpl10             | ribosomal protein<br>10                                       | 0.461 | 0.0016474 |
| 1417258_at   | Cct5              | chaperonin<br>containing Tcp1,<br>subunit 5<br>(epsilon)      | 0.461 | 0.0019573 |
| 1429739_a_at | Patz1             | POZ (BTB) and<br>AT hook<br>containing zinc<br>finger 1       | 0.461 | 0.0107928 |
| 1448103_s_at | Nono              | non-POU-domain-<br>containing,<br>octamer binding<br>protein  | 0.461 | 0.0011    |
| 1440621_at   | NA                | NA                                                            | 0.461 | 0.0113304 |
| 1451088_a_at | Oxa11             | oxidase assembly<br>1-like                                    | 0.461 | 0.019752  |
| 1439393_x_at | Ppp2r4            | protein<br>phosphatase 2A,<br>regulatory subunit<br>B (PR 53) | 0.462 | 0.007718  |
| 1433746_at   | Wdr3              | WD repeat<br>domain 3                                         | 0.462 | 0.0015714 |
| 1438391_x_at | Hsd17b10          | hydroxysteroid<br>(17-beta)<br>dehydrogenase<br>10            | 0.462 | 0.0073311 |
| 1427482_a_at | Car8              | carbonic<br>anhydrase 8                                       | 0.462 | 0.0113356 |
| 1454890_at   | Amot              | angiomin                                                      | 0.462 | 0.0040626 |

|                |        |                                                                                           |       |           |
|----------------|--------|-------------------------------------------------------------------------------------------|-------|-----------|
| 1434941_s_at   | Esf1   | ESF1, nucleolar pre-rRNA processing protein, homolog (S. cerevisiae)                      | 0.462 | 0.0010981 |
| 1438527_at     | Rpl3   | ribosomal protein L3                                                                      | 0.462 | 0.0077868 |
| 1451170_s_at   | Nomo1  | nodal modulator 1                                                                         | 0.462 | 0.006204  |
| 1423441_at     | Tfb2m  | transcription factor B2, mitochondrial                                                    | 0.462 | 0.0056065 |
| 1450372_a_at   | Rpl18  | ribosomal protein L18                                                                     | 0.463 | 0.0019301 |
| AFFX-DapX-M_at | NA     | NA                                                                                        | 0.463 | 0.0433381 |
| 1424942_a_at   | Myc    | myelocytomatosis oncogene                                                                 | 0.463 | 0.0131385 |
| 1448142_x_at   | Rps13  | ribosomal protein S13                                                                     | 0.463 | 0.0012512 |
| 1456698_s_at   | Hnrpdl | heterogeneous nuclear ribonucleoprotein D-like                                            | 0.463 | 0.0040663 |
| 1429329_at     | Cox10  | COX10 homolog, cytochrome c oxidase assembly protein, heme A: farnesyltransferase (yeast) | 0.463 | 0.0015557 |
| 1452635_x_at   | Josd3  | Josephin domain containing 3                                                              | 0.463 | 0.0013696 |
| 1422778_at     | Taf9   | TAF9 RNA polymerase II, TATA box binding protein (TBP)-associated factor                  | 0.463 | 0.0012867 |
| 1423735_a_at   | Wdr36  | WD repeat domain 36                                                                       | 0.463 | 0.0016693 |
| 1448896_at     | Pigf   | phosphatidylinositol glycan anchor biosynthesis, class F                                  | 0.464 | 0.0046217 |

|              |                |                                                              |       |           |
|--------------|----------------|--------------------------------------------------------------|-------|-----------|
| 1417763_at   | Ssr1           | signal sequence receptor, alpha                              | 0.464 | 0.0028519 |
| 1416155_at   | Hmgb3          | high mobility group box 3                                    | 0.464 | 0.0030458 |
| 1439572_at   | NA             | NA                                                           | 0.464 | 0.0318952 |
| 1437199_at   | Dusp5          | dual specificity phosphatase 5                               | 0.465 | 0.002723  |
| 1456131_x_at | Dag1           | dystroglycan 1                                               | 0.465 | 0.0275826 |
| 1418507_s_at | Socs2          | suppressor of cytokine signaling 2                           | 0.465 | 0.0044349 |
| 1426087_at   | Icosl          | icos ligand                                                  | 0.465 | 0.0307335 |
| 1433516_a_at | Myeov2         | myeloma overexpressed 2                                      | 0.465 | 0.0037394 |
| 1451470_s_at | Eif5a          | eukaryotic translation initiation factor 5A                  | 0.465 | 0.0015425 |
| 1452866_at   | Nars           | asparaginyl-tRNA synthetase                                  | 0.465 | 0.0022695 |
| 1418943_at   | B230120H23 Rik | RIKEN cDNA B230120H23 gene                                   | 0.466 | 0.0180059 |
| 1451103_at   | D14Ert500e     | DNA segment, Chr 14, ERATO Doi 500, expressed                | 0.466 | 0.0014355 |
| 1441023_at   | Eif2s2         | eukaryotic translation initiation factor 2, subunit 2 (beta) | 0.466 | 0.0034118 |
| 1417380_at   | Iqgap1         | IQ motif containing GTPase activating protein 1              | 0.466 | 0.0012135 |
| 1423131_at   | 5730427N09Rik  | RIKEN cDNA 5730427N09 gene                                   | 0.466 | 0.0019284 |

|              |               |                                                                     |       |           |
|--------------|---------------|---------------------------------------------------------------------|-------|-----------|
| 1438516_at   | Rif1          | Rap1 interacting factor 1 homolog (yeast)                           | 0.467 | 0.0083037 |
| 1428942_at   | Mt2           | metallothionein 2                                                   | 0.467 | 0.0080469 |
| 1438477_a_at | Mcee          | methylmalonyl CoA epimerase                                         | 0.467 | 0.0070696 |
| 1424620_at   | D13Wsu177e    | DNA segment, Chr 13, Wayne State University 177, expressed          | 0.467 | 0.0064505 |
| 1418869_a_at | Pus1          | pseudouridine synthase 1                                            | 0.467 | 0.001214  |
| 1422884_at   | Snrpd3        | small nuclear ribonucleoprotein D3                                  | 0.467 | 0.0015928 |
| 1424098_at   | Elov17        | ELOVL family member 7, elongation of long chain fatty acids (yeast) | 0.467 | 0.018892  |
| 1457472_at   | Gigyf2        | GRB10 interacting GYF protein 2                                     | 0.468 | 0.0449153 |
| 1416070_a_at | Ddx18         | DEAD (Asp-Glu-Ala-Asp) box polypeptide 18                           | 0.468 | 0.0241729 |
| 1433893_s_at | Spag5         | sperm associated antigen 5                                          | 0.468 | 0.0034937 |
| 1458710_at   | NA            | NA                                                                  | 0.468 | 0.0042227 |
| 1447936_at   | 2410006H16Rik | RIKEN cDNA 2410006H16 gene                                          | 0.469 | 0.0028628 |
| 1435923_at   | Ado           | 2-aminoethanethiol (cysteamine) dioxygenase                         | 0.469 | 0.0052233 |
| 1429433_at   | Bat2d         | BAT2 domain containing 1                                            | 0.469 | 0.008854  |
| 1434011_a_at | Ints5         | integrator complex subunit 5                                        | 0.469 | 0.001081  |

|                |         |                                                                                                                   |       |           |
|----------------|---------|-------------------------------------------------------------------------------------------------------------------|-------|-----------|
| AFFX-DapX-3_at | NA      | NA                                                                                                                | 0.469 | 0.0394814 |
| 1421557_x_at   | Txn2    | thioredoxin 2                                                                                                     | 0.470 | 0.0036295 |
| 1417947_at     | Pcna    | proliferating cell nuclear antigen                                                                                | 0.470 | 0.0024405 |
| 1438315_x_at   | Akr7a5  | aldo-keto reductase family 7, member A5 (aflatoxin aldehyde reductase)                                            | 0.470 | 0.003877  |
| 1415750_at     | Tbl3    | transducin (beta)-like 3                                                                                          | 0.470 | 0.0014994 |
| 1456117_at     | Rrp1b   | ribosomal RNA processing 1 homolog B (S. cerevisiae)                                                              | 0.470 | 0.0016302 |
| 1423564_a_at   | Paics   | phosphoribosylaminoimidazole carboxylase, phosphoribosylaminoribosylaminoimidazole, succinocarboxamide synthetase | 0.470 | 0.0028111 |
| 1418119_at     | Rbm8a   | RNA binding motif protein 8a                                                                                      | 0.471 | 0.0013952 |
| 1457281_at     | Dnajc21 | DnaJ (Hsp40) homolog, subfamily C, member 21                                                                      | 0.471 | 0.0230777 |
| 1416577_a_at   | Rbx1    | ring-box 1                                                                                                        | 0.471 | 0.0056745 |
| 1428262_s_at   | Hnrnpa3 | heterogeneous nuclear ribonucleoprotein A3                                                                        | 0.471 | 0.0043656 |
| 1438292_x_at   | Adk     | adenosine kinase                                                                                                  | 0.471 | 0.0060136 |
| 1428588_a_at   | Mrpl41  | mitochondrial ribosomal protein L41                                                                               | 0.471 | 0.0028502 |
| 1455679_at     | NA      | NA                                                                                                                | 0.471 | 0.0106224 |



|              |               |                                                                          |       |           |
|--------------|---------------|--------------------------------------------------------------------------|-------|-----------|
| 1424291_at   | Nup93         | nucleoporin 93                                                           | 0.471 | 0.0021939 |
| 1434232_a_at | 2610030H06Rik | RIKEN cDNA 2610030H06 gene                                               | 0.472 | 0.0022746 |
| 1437838_x_at | Grsf1         | G-rich RNA sequence binding factor 1                                     | 0.472 | 0.0010501 |
| 1429587_at   | Rbm34         | RNA binding motif protein 34                                             | 0.472 | 0.0053939 |
| 1416581_at   | Wdr5          | WD repeat domain 5                                                       | 0.472 | 0.0010091 |
| 1448226_at   | Rrm2          | ribonucleotide reductase M2                                              | 0.472 | 0.0023371 |
| 1423648_at   | Pdia6         | protein disulfide isomerase associated 6                                 | 0.472 | 0.0050751 |
| 1460432_a_at | Eif3e         | eukaryotic translation initiation factor 3, subunit E                    | 0.472 | 0.0011543 |
| 1438495_at   | Top1          | topoisomerase (DNA) I                                                    | 0.472 | 0.0086195 |
| 1423421_at   | Ankrd49       | ankyrin repeat domain 49                                                 | 0.472 | 0.0023482 |
| 1451641_at   | Dbr1          | debranching enzyme homolog 1 ( <i>S. cerevisiae</i> )                    | 0.472 | 0.0011965 |
| 1427214_at   | Agmat         | agmatine ureohydrolase (agmatinase)                                      | 0.472 | 0.0126893 |
| 1437982_x_at | Cox15         | COX15 homolog, cytochrome c oxidase assembly protein (yeast)             | 0.473 | 0.0104604 |
| 1451509_at   | Taf9          | TAF9 RNA polymerase II, TATA box binding protein (TBP)-associated factor | 0.473 | 0.0017514 |
| 1424136_a_at | Ppih          | peptidyl prolyl isomerase H                                              | 0.473 | 0.001188  |

|              |                   |                                                                |       |           |
|--------------|-------------------|----------------------------------------------------------------|-------|-----------|
| 1416030_a_at | Mcm7              | minichromosome maintenance deficient 7 (S. cerevisiae)         | 0.473 | 0.0012612 |
| 1422718_at   | Ap3s2             | adaptor-related protein complex 3, sigma 2 subunit             | 0.473 | 0.0094917 |
| 1416859_at   | Fkbp3             | FK506 binding protein 3                                        | 0.474 | 0.0035286 |
| 1433586_at   | Rgmb              | RGM domain family, member B                                    | 0.474 | 0.0141505 |
| 1417156_at   | Krt19             | keratin 19                                                     | 0.474 | 0.022338  |
| 1422836_at   | Mbnl3             | muscleblind-like 3 (Drosophila)                                | 0.474 | 0.012779  |
| 1423074_at   | Lman2             | lectin, mannose-binding 2                                      | 0.474 | 0.0118745 |
| 1430034_at   | Cct4              | chaperonin containing Tcp1, subunit 4 (delta)                  | 0.474 | 0.0056973 |
| 1425109_at   | Slc44a3           | solute carrier family 44, member 3                             | 0.474 | 0.0325848 |
| 1435534_a_at | OTTMUSG0000016825 | predicted gene, OTTMUSG0000016825                              | 0.474 | 0.0015088 |
| 1438802_at   | Foxp1             | forkhead box P1                                                | 0.474 | 0.0089906 |
| 1452585_at   | Mrps28            | mitochondrial ribosomal protein S28                            | 0.474 | 0.0242492 |
| 1448677_at   | Cox4nb            | COX4 neighbor                                                  | 0.475 | 0.0035856 |
| 1426118_a_at | Tomm40            | translocase of outer mitochondrial membrane 40 homolog (yeast) | 0.475 | 0.0275375 |
| 1452580_a_at | Mrpl21            | mitochondrial ribosomal protein L21                            | 0.475 | 0.0048981 |

|              |               |                                                          |       |           |
|--------------|---------------|----------------------------------------------------------|-------|-----------|
| 1433706_a_at | Ptplad1       | protein tyrosine phosphatase-like A domain containing 1  | 0.475 | 0.0020643 |
| 1452047_at   | Cacybp        | calcyclin binding protein                                | 0.475 | 0.0014083 |
| 1437986_x_at | Fuk           | fucokinase                                               | 0.475 | 0.0289328 |
| 1428556_at   | Pigy          | phosphatidylinositol glycan anchor biosynthesis, class Y | 0.476 | 0.0018214 |
| 1428844_a_at | Bclaf1        | BCL2-associated transcription factor 1                   | 0.476 | 0.0012751 |
| 1448176_a_at | Hnrnpk        | heterogeneous nuclear ribonucleoprotein K                | 0.476 | 0.0011052 |
| 1449090_a_at | Yes1          | Yamaguchi sarcoma viral (v-yes) oncogene homolog 1       | 0.476 | 0.002708  |
| 1423884_at   | Cirh1a        | cirrhosis, autosomal recessive 1A (human)                | 0.476 | 0.0065998 |
| 1423132_a_at | 5730427N09Rik | RIKEN cDNA 5730427N09 gene                               | 0.476 | 0.0017772 |
| 1455102_at   | Larp4         | La ribonucleoprotein domain family, member 4             | 0.476 | 0.0118148 |
| 1428633_at   | Twistnb       | TWIST neighbor                                           | 0.476 | 0.0227396 |
| 1416172_at   | Pes1          | pescadillo homolog 1, containing BRCT domain (zebrafish) | 0.476 | 0.0018128 |
| 1439962_at   | 2310010J17Rik | RIKEN cDNA 2310010J17 gene                               | 0.476 | 0.0063657 |
| 1457343_at   | NA            | NA                                                       | 0.477 | 0.0117409 |

|              |                   |                                                                                             |       |           |
|--------------|-------------------|---------------------------------------------------------------------------------------------|-------|-----------|
| 1423430_at   | Mybbp1a           | MYB binding protein (P160) 1a                                                               | 0.477 | 0.0288432 |
| 1420477_at   | Nap111            | nucleosome assembly protein 1-like 1                                                        | 0.477 | 0.0101867 |
| 1448465_at   | Nipsnap1          | 4-nitrophenylphosphatase domain and non-neuronal SNAP25-like protein homolog 1 (C. elegans) | 0.477 | 0.0075694 |
| 1416170_at   | Trap1             | TNF receptor-associated protein 1                                                           | 0.477 | 0.0057444 |
| 1427250_at   | Atp2a2            | ATPase, Ca <sup>++</sup> transporting, cardiac muscle, slow twitch 2                        | 0.478 | 0.0097943 |
| 1447961_s_at | Mrpl38            | mitochondrial ribosomal protein L38                                                         | 0.478 | 0.0078184 |
| 1417083_at   | Sec61b            | Sec61 beta subunit                                                                          | 0.478 | 0.003608  |
| 1436652_at   | 5830418K08Rik     | RIKEN cDNA 5830418K08 gene                                                                  | 0.478 | 0.02097   |
| 1426698_a_at | Hnrnmp            | heterogeneous nuclear ribonucleoprotein M                                                   | 0.478 | 0.001373  |
| 1436935_x_at | ENSMUSG0000056003 | predicted gene, ENSMUSG0000056003                                                           | 0.478 | 0.0019468 |
| 1454725_at   | Tra2a             | transformer 2 alpha homolog (Drosophila)                                                    | 0.478 | 0.0012979 |
| 1436531_at   | Metap2            | methionine aminopeptidase 2                                                                 | 0.478 | 0.0102704 |
| 1428970_at   | Nat13             | N-acetyltransferase 13                                                                      | 0.479 | 0.0013246 |
| 1446692_at   | NA                | NA                                                                                          | 0.479 | 0.0026456 |

|              |               |                                                                         |       |           |
|--------------|---------------|-------------------------------------------------------------------------|-------|-----------|
| 1451356_at   | Anp32e        | acidic (leucine-rich) nuclear phosphoprotein 32 family, member E        | 0.479 | 0.0012675 |
| 1428090_at   | Ptcd3         | pentatricopeptide repeat domain 3                                       | 0.479 | 0.0051132 |
| 1436838_x_at | Cot11         | coactosin-like 1 (Dictyostelium)                                        | 0.479 | 0.0028086 |
| 1434135_at   | B3galnt2      | UDP-GalNAc:betaGlcNAc beta 1,3-galactosaminyltransferase, polypeptide 2 | 0.479 | 0.0350886 |
| 1417665_a_at | Cpsf1         | cleavage and polyadenylation specific factor 1                          | 0.480 | 0.0036809 |
| 1424200_s_at | Seh11         | SEH1-like (S. cerevisiae)                                               | 0.480 | 0.0014049 |
| 1451249_at   | Trmt1         | TRM1 tRNA methyltransferase 1 homolog (S. cerevisiae)                   | 0.481 | 0.0043798 |
| 1453234_at   | 1300002K09Rik | RIKEN cDNA 1300002K09 gene                                              | 0.481 | 0.0054605 |
| 1433534_a_at | Cct2          | chaperonin containing Tcp1, subunit 2 (beta)                            | 0.481 | 0.0021068 |
| 1436523_s_at | 1810022K09Rik | RIKEN cDNA 1810022K09 gene                                              | 0.481 | 0.0012313 |
| 1428619_at   | 2310005N03Rik | RIKEN cDNA 2310005N03 gene                                              | 0.481 | 0.0019284 |
| 1439057_x_at | Zdhhc6        | zinc finger, DHHC domain containing 6                                   | 0.481 | 0.0103182 |
| 1440267_at   | Pex1          | peroxisome biogenesis factor 1                                          | 0.482 | 0.0283562 |
| 1438908_at   | Pcbp2         | poly(rC) binding protein 2                                              | 0.482 | 0.0054514 |

|              |          |                                                                                 |       |           |
|--------------|----------|---------------------------------------------------------------------------------|-------|-----------|
| 1436595_at   | Rbm34    | RNA binding motif protein 34                                                    | 0.482 | 0.0229993 |
| 1443833_at   | NA       | NA                                                                              | 0.482 | 0.0460123 |
| 1426162_a_at | Rpl7     | ribosomal protein L7                                                            | 0.482 | 0.0026675 |
| 1434766_at   | NA       | NA                                                                              | 0.482 | 0.0048356 |
| 1434842_s_at | Upf3b    | UPF3 regulator of nonsense transcripts homolog B (yeast)                        | 0.482 | 0.0013872 |
| 1428892_at   | Ppil1    | peptidylprolyl isomerase (cyclophilin)-like 1                                   | 0.482 | 0.0055486 |
| 1421895_at   | Eif2s3x  | eukaryotic translation initiation factor 2, subunit 3, structural gene X-linked | 0.482 | 0.0031856 |
| 1436420_a_at | Ipo4     | importin 4                                                                      | 0.482 | 0.002111  |
| 1417948_s_at | Ilf2     | interleukin enhancer binding factor 2                                           | 0.483 | 0.023949  |
| 1454843_at   | Prps2    | phosphoribosyl pyrophosphate synthetase 2                                       | 0.483 | 0.0037642 |
| 1438415_s_at | Carm1    | coactivator-associated arginine methyltransferase 1                             | 0.483 | 0.0126041 |
| 1434106_at   | Epm2aip1 | EPM2A (laforin) interacting protein 1                                           | 0.483 | 0.0320395 |
| 1423493_a_at | Nfix     | nuclear factor I/X                                                              | 0.483 | 0.0067329 |
| 1417873_at   | Pwp1     | PWP1 homolog (S. cerevisiae)                                                    | 0.483 | 0.0012457 |

|              |                   |                                                                            |       |           |
|--------------|-------------------|----------------------------------------------------------------------------|-------|-----------|
| 1419406_a_at | Bcl11a            | B-cell<br>CLL/lymphoma<br>11A (zinc finger<br>protein)                     | 0.484 | 0.010603  |
| 1434866_x_at | Cpt1a             | carnitine<br>palmitoyltransfera<br>se 1a, liver                            | 0.484 | 0.0028853 |
| 1416884_at   | Cbx3              | chromobox<br>homolog 3<br>(Drosophila HP1<br>gamma)                        | 0.484 | 0.0015254 |
| 1460672_at   | 2410002F23R<br>ik | RIKEN cDNA<br>2410002F23<br>gene                                           | 0.484 | 0.0069564 |
| 1431506_s_at | Pp1h              | peptidyl prolyl<br>isomerase H                                             | 0.484 | 0.0055044 |
| 1436451_a_at | Tmed2             | transmembrane<br>emp24 domain<br>trafficking protein<br>2                  | 0.484 | 0.0051181 |
| 1452691_at   | Rbm17             | RNA binding<br>motif protein 17                                            | 0.484 | 0.0017168 |
| 1424474_a_at | Camkk2            | calcium/calmoduli<br>n-dependent<br>protein kinase<br>kinase 2, beta       | 0.484 | 0.022852  |
| 1433679_at   | Fubp3             | far upstream<br>element (FUSE)<br>binding protein 3                        | 0.484 | 0.0028432 |
| 1423333_at   | Ergic1            | endoplasmic<br>reticulum-golgi<br>intermediate<br>compartment<br>(ERGIC) 1 | 0.484 | 0.0027744 |
| 1424143_a_at | Cdt1              | chromatin<br>licensing and<br>DNA replication<br>factor 1                  | 0.485 | 0.0022388 |
| 1460575_at   | Eif2a             | eukaryotic<br>translation<br>initiation factor 2a                          | 0.485 | 0.001234  |
| 1416064_a_at | Hspa5             | heat shock<br>protein 5                                                    | 0.485 | 0.0041438 |

|              |               |                                                                  |       |           |
|--------------|---------------|------------------------------------------------------------------|-------|-----------|
| 1429259_a_at | 1190007I07Rik | RIKEN cDNA 1190007I07 gene                                       | 0.485 | 0.0036181 |
| 1416346_at   | Timm8a1       | translocase of inner mitochondrial membrane 8 homolog a1 (yeast) | 0.485 | 0.0033188 |
| 1437242_at   | Ttll12        | tubulin tyrosine ligase-like family, member 12                   | 0.485 | 0.0110784 |
| 1428200_a_at | Pdxdc1        | pyridoxal-dependent decarboxylase domain containing 1            | 0.485 | 0.0083983 |
| 1426674_at   | Eif3b         | eukaryotic translation initiation factor 3, subunit B            | 0.485 | 0.0015796 |
| 1452616_s_at | Ssbp1         | single-stranded DNA binding protein 1                            | 0.485 | 0.0037223 |
| 1420017_at   | Tspan8        | tetraspanin 8                                                    | 0.486 | 0.0119069 |
| 1418564_s_at | Serbp1        | Serpine1 mRNA binding protein 1                                  | 0.486 | 0.0015292 |
| 1448847_at   | Serinc3       | serine incorporator 3                                            | 0.486 | 0.0226722 |
| 1418022_at   | Narg1         | NMDA receptor-regulated gene 1                                   | 0.486 | 0.002595  |
| 1456316_a_at | Acbd3         | acyl-Coenzyme A binding domain containing 3                      | 0.486 | 0.0402157 |
| 1439010_at   | Larp4         | La ribonucleoprotein domain family, member 4                     | 0.486 | 0.0121824 |
| 1452159_at   | 2310001A20Rik | RIKEN cDNA 2310001A20 gene                                       | 0.486 | 0.0298256 |



|              |          |                                                             |       |           |
|--------------|----------|-------------------------------------------------------------|-------|-----------|
| 1416536_at   | Mum1     | melanoma associated antigen (mutated) 1                     | 0.486 | 0.0030744 |
| 1421914_s_at | Mrpl19   | mitochondrial ribosomal protein L19                         | 0.486 | 0.0294963 |
| 1455816_a_at | Kctd3    | potassium channel tetramerisation domain containing 3       | 0.487 | 0.0036278 |
| 1435177_a_at | Anapc5   | anaphase-promoting complex subunit 5                        | 0.487 | 0.0013661 |
| 1452778_x_at | Nap111   | nucleosome assembly protein 1-like 1                        | 0.487 | 0.0041678 |
| 1424077_at   | Gdpd1    | glycerophosphodiester phosphodiesterase domain containing 1 | 0.487 | 0.0191304 |
| 1415833_x_at | Rps29    | ribosomal protein S29                                       | 0.487 | 0.0016758 |
| 1428080_at   | Pgam5    | phosphoglycerate mutase family member 5                     | 0.488 | 0.0034381 |
| 1434512_x_at | Sfrs3    | splicing factor, arginine/serine-rich 3 (SRp20)             | 0.488 | 0.0030068 |
| 1448811_at   | Mrpl2    | mitochondrial ribosomal protein L2                          | 0.488 | 0.0059209 |
| 1426994_at   | Phlpp    | PH domain and leucine rich repeat protein phosphatase       | 0.488 | 0.0056478 |
| 1424344_s_at | Eif1a    | eukaryotic translation initiation factor 1A                 | 0.488 | 0.0018337 |
| 1426607_at   | EG633640 | predicted gene, EG633640                                    | 0.488 | 0.0299118 |

|              |               |                                                                                                                   |       |           |
|--------------|---------------|-------------------------------------------------------------------------------------------------------------------|-------|-----------|
| 1455860_at   | Pigh          | phosphatidylinositol glycan anchor biosynthesis, class H                                                          | 0.488 | 0.0096795 |
| 1437007_x_at | Usp39         | ubiquitin specific peptidase 39                                                                                   | 0.488 | 0.0017564 |
| 1452676_a_at | Pnpt1         | polyribonucleotide nucleotidyltransferase 1                                                                       | 0.488 | 0.0050854 |
| 1459981_s_at | LOC100045795  | similar to mKIAA3002 protein                                                                                      | 0.488 | 0.0078866 |
| 1454714_x_at | Phgdh         | 3-phosphoglycerate dehydrogenase                                                                                  | 0.489 | 0.0093102 |
| 1456082_x_at | Cct4          | chaperonin containing Tcp1, subunit 4 (delta)                                                                     | 0.489 | 0.0032334 |
| 1428483_a_at | 2610039C10Rik | RIKEN cDNA 2610039C10 gene                                                                                        | 0.489 | 0.005233  |
| 1452049_at   | Rpl7l1        | ribosomal protein L7-like 1                                                                                       | 0.489 | 0.0013077 |
| 1417506_at   | Gmnn          | geminin                                                                                                           | 0.490 | 0.0101367 |
| 1455550_x_at | Serinc3       | serine incorporator 3                                                                                             | 0.490 | 0.0028593 |
| 1434145_s_at | Serhl         | serine hydrolase-like                                                                                             | 0.490 | 0.0056954 |
| 1423565_at   | Paics         | phosphoribosylaminoimidazole carboxylase, phosphoribosylaminoribosylaminoimidazole, succinocarboxamide synthetase | 0.490 | 0.0045902 |
| 1448452_at   | Irf8          | interferon regulatory factor 8                                                                                    | 0.490 | 0.0033837 |
| 1435524_at   | NA            | NA                                                                                                                | 0.490 | 0.0019669 |

|              |         |                                                                |       |           |
|--------------|---------|----------------------------------------------------------------|-------|-----------|
| 1450735_at   | Pno1    | partner of NOB1 homolog (S. cerevisiae)                        | 0.490 | 0.002613  |
| 1417499_at   | Timm10  | translocase of inner mitochondrial membrane 10 homolog (yeast) | 0.490 | 0.0019258 |
| 1451265_at   | Ccdc115 | coiled-coil domain containing 115                              | 0.491 | 0.008813  |
| 1417340_at   | Glrx3   | glutaredoxin 3                                                 | 0.491 | 0.0017246 |
| 1428747_at   | Trspap1 | tRNA selenocysteine associated protein 1                       | 0.491 | 0.0019975 |
| 1447053_x_at | Ssr3    | signal sequence receptor, gamma                                | 0.491 | 0.0061591 |
| 1416907_at   | Tsn     | translin                                                       | 0.491 | 0.0072632 |
| 1429461_at   | Ints2   | integrator complex subunit 2                                   | 0.491 | 0.0064756 |
| 1456272_at   | NA      | NA                                                             | 0.491 | 0.0108061 |
| 1434030_at   | Gtpbp10 | GTP-binding protein 10 (putative)                              | 0.491 | 0.0059972 |
| 1442338_at   | NA      | NA                                                             | 0.492 | 0.0118172 |
| 1456374_x_at | Eif3c   | eukaryotic translation initiation factor 3, subunit C          | 0.492 | 0.0021584 |
| 1431980_a_at | As3mt   | arsenic (+3 oxidation state) methyltransferase                 | 0.492 | 0.0025231 |
| 1427042_at   | Mal2    | mal, T-cell differentiation protein 2                          | 0.492 | 0.0310893 |

|              |         |                                                                                             |       |           |
|--------------|---------|---------------------------------------------------------------------------------------------|-------|-----------|
| 1456253_s_at | Plekhn1 | pleckstrin homology domain containing, family N member 1                                    | 0.493 | 0.0053597 |
| 1426384_a_at | Ywhae   | tyrosine 3-monooxygenase/tryptophan 5-monooxygenase activation protein, epsilon polypeptide | 0.493 | 0.005012  |
| 1426613_a_at | Snrpb2  | U2 small nuclear ribonucleoprotein B                                                        | 0.493 | 0.0053688 |
| 1431889_x_at | Psg21   | pregnancy-specific glycoprotein 21                                                          | 0.493 | 0.0201618 |
| 1448221_at   | Bat1a   | HLA-B-associated transcript 1A                                                              | 0.493 | 0.0015115 |
| 1423839_a_at | Btf3    | basic transcription factor 3                                                                | 0.493 | 0.0014779 |
| 1449799_s_at | Pkp2    | plakophilin 2                                                                               | 0.494 | 0.0015132 |
| 1416292_at   | Prdx3   | peroxiredoxin 3                                                                             | 0.494 | 0.0050076 |
| 1437843_s_at | Nupl1   | nucleoporin like 1                                                                          | 0.494 | 0.0055422 |
| 1423158_at   | Gnpat1  | glucosamine-phosphate N-acetyltransferase 1                                                 | 0.494 | 0.0063351 |
| 1430127_a_at | Ccnd2   | cyclin D2                                                                                   | 0.494 | 0.0027012 |
| 1456314_x_at | Cdk2ap1 | CDK2 (cyclin-dependent kinase 2)-associated protein 1                                       | 0.494 | 0.0015438 |
| 1438991_x_at | Ppp2r1a | protein phosphatase 2 (formerly 2A), regulatory subunit A (PR 65), alpha isoform            | 0.494 | 0.0146973 |

|              |              |                                                                                 |       |           |
|--------------|--------------|---------------------------------------------------------------------------------|-------|-----------|
| 1448187_at   | Pold1        | polymerase (DNA directed), delta 1, catalytic subunit                           | 0.494 | 0.0103233 |
| 1438177_x_at | LOC100048085 | similar to ectonucleoside triphosphate diphosphohydrolase 4                     | 0.495 | 0.004089  |
| 1434823_x_at | Myeov2       | myeloma overexpressed 2                                                         | 0.495 | 0.0024094 |
| 1417722_at   | Pgls         | 6-phosphogluconolactonase                                                       | 0.495 | 0.0042671 |
| 1423747_a_at | Pdk1         | pyruvate dehydrogenase kinase, isoenzyme 1                                      | 0.495 | 0.0017773 |
| 1421948_a_at | Ccdc123      | coiled-coil domain containing 123                                               | 0.495 | 0.0292606 |
| 1415867_at   | Cct4         | chaperonin containing Tcp1, subunit 4 (delta)                                   | 0.495 | 0.0031768 |
| 1427504_s_at | Sfrs2        | splicing factor, arginine/serine-rich 2 (SC-35)                                 | 0.495 | 0.0033755 |
| 1417451_a_at | Ppia         | peptidylprolyl isomerase A                                                      | 0.495 | 0.0017554 |
| 1428407_at   | Hnrnpa0      | heterogeneous nuclear ribonucleoprotein A0                                      | 0.495 | 0.0015938 |
| 1423744_x_at | Eif2s3x      | eukaryotic translation initiation factor 2, subunit 3, structural gene X-linked | 0.495 | 0.0018742 |
| 1416617_at   | Acss1        | acyl-CoA synthetase short-chain family member 1                                 | 0.495 | 0.0054597 |

|              |               |                                                                                  |       |           |
|--------------|---------------|----------------------------------------------------------------------------------|-------|-----------|
| 1427342_at   | Fastkd1       | FAST kinase domains 1                                                            | 0.496 | 0.0246616 |
| 1437099_x_at | Hnrnpf        | heterogeneous nuclear ribonucleoprotein F                                        | 0.496 | 0.0059544 |
| 1438383_x_at | Ppp2r1a       | protein phosphatase 2 (formerly 2A), regulatory subunit A (PR 65), alpha isoform | 0.496 | 0.0140432 |
| 1415687_a_at | Psap          | prosaposin                                                                       | 0.496 | 0.0029558 |
| 1423210_a_at | Nola3         | nucleolar protein family A, member 3                                             | 0.496 | 0.0015442 |
| 1423643_at   | Ddx39         | DEAD (Asp-Glu-Ala-Asp) box polypeptide 39                                        | 0.497 | 0.0061275 |
| 1440050_at   | Hbs1l         | Hbs1-like (S. cerevisiae)                                                        | 0.497 | 0.0030443 |
| 1428167_a_at | Mpzl1         | myelin protein zero-like 1                                                       | 0.497 | 0.0146045 |
| 1428061_at   | Hat1          | histone aminotransferase 1                                                       | 0.497 | 0.0027243 |
| 1452359_at   | Rel1          | RELT-like 1                                                                      | 0.497 | 0.0178123 |
| 1438859_x_at | Rps29         | ribosomal protein S29                                                            | 0.497 | 0.0034936 |
| 1449491_at   | Card10        | caspase recruitment domain family, member 10                                     | 0.497 | 0.0052442 |
| 1418380_at   | Terf1         | telomeric repeat binding factor 1                                                | 0.498 | 0.0029855 |
| 1456419_at   | 5730455P16Rik | RIKEN cDNA 5730455P16 gene                                                       | 0.498 | 0.0117356 |
| 1452370_s_at | B230208H17Rik | RIKEN cDNA B230208H17 gene                                                       | 0.498 | 0.0317187 |
| 1453729_a_at | Rpl37         | ribosomal protein L37                                                            | 0.498 | 0.0017745 |
| 1422613_a_at | Rpl7a         | ribosomal protein L7a                                                            | 0.498 | 0.003367  |

|              |                |                                                                                   |       |           |
|--------------|----------------|-----------------------------------------------------------------------------------|-------|-----------|
| 1415728_at   | Pabpn1         | poly(A) binding protein, nuclear 1                                                | 0.498 | 0.0043007 |
| 1438643_at   | Camk1d         | calcium/calmodulin-dependent protein kinase ID                                    | 0.499 | 0.0117811 |
| 1452797_at   | Fastkd3        | FAST kinase domains 3                                                             | 0.499 | 0.0025866 |
| 1454955_at   | Ipo7           | importin 7                                                                        | 0.499 | 0.0062257 |
| 1455036_s_at | Ndufc2         | NADH dehydrogenase (ubiquinone) 1, subcomplex unknown, 2                          | 0.499 | 0.0055262 |
| 1428207_at   | Bcl7a          | B-cell CLL/lymphoma 7A                                                            | 0.499 | 0.0087898 |
| 1436591_at   | BC023744       | cDNA sequence BC023744                                                            | 0.499 | 0.0129104 |
| 1439062_at   | Kbtbd3         | kelch repeat and BTB (POZ) domain containing 3                                    | 0.499 | 0.0075113 |
| 1456393_at   | Pdcd4          | programmed cell death 4                                                           | 0.499 | 0.002777  |
| 1429711_at   | Styx           | serine/threonine/tyrosine interaction protein                                     | 0.499 | 0.0065386 |
| 1426293_at   | Zfp790         | zinc finger protein 790                                                           | 0.499 | 0.029597  |
| 1430985_at   | 1810027O10 Rik | RIKEN cDNA 1810027O10 gene                                                        | 0.500 | 0.0021712 |
| 1436349_at   | 2700094K13Rik  | RIKEN cDNA 2700094K13 gene                                                        | 0.500 | 0.0023364 |
| 1455824_x_at | Stt3a          | STT3, subunit of the oligosaccharyltransferase complex, homolog A (S. cerevisiae) | 0.500 | 0.0043146 |

|              |               |                                                                                     |       |           |
|--------------|---------------|-------------------------------------------------------------------------------------|-------|-----------|
| 1454995_at   | Ddah1         | dimethylarginine dimethylaminohydrolase 1                                           | 0.500 | 0.0147167 |
| 1453311_at   | 2310008B10Rik | RIKEN cDNA 2310008B10 gene                                                          | 0.500 | 0.0162026 |
| 1433824_x_at | Grsf1         | G-rich RNA sequence binding factor 1                                                | 0.500 | 0.0047052 |
| 1434645_at   | C530008M17Rik | RIKEN cDNA C530008M17 gene                                                          | 2.001 | 0.0082984 |
| 1416326_at   | Crip1         | cysteine-rich protein 1 (intestinal)                                                | 2.002 | 0.0033956 |
| 1444934_at   | Zfp276        | zinc finger protein (C2H2 type) 276                                                 | 2.002 | 0.040307  |
| 1448382_at   | Ehhadh        | enoyl-Coenzyme A, hydratase/3-hydroxyacyl Coenzyme A dehydrogenase                  | 2.003 | 0.0292536 |
| 1426441_at   | Slc11a2       | solute carrier family 11 (proton-coupled divalent metal ion transporters), member 2 | 2.004 | 0.0261568 |
| 1420427_a_at | Dhx32         | DEAH (Asp-Glu-Ala-His) box polypeptide 32                                           | 2.004 | 0.0354827 |
| 1417892_a_at | Sirt3         | sirtuin 3 (silent mating type information regulation 2, homolog) 3 (S. cerevisiae)  | 2.004 | 0.0068004 |
| 1433527_at   | Ireb2         | iron responsive element binding protein 2                                           | 2.005 | 0.0088285 |



|              |                   |                                                                                |       |           |
|--------------|-------------------|--------------------------------------------------------------------------------|-------|-----------|
| 1423187_at   | Gabarapl2         | gamma-aminobutyric acid (GABA-A) receptor-associated protein-like 2            | 2.005 | 0.0030445 |
| 1455018_at   | Lmtk2             | lemur tyrosine kinase 2                                                        | 2.006 | 0.0093075 |
| 1443670_at   | 2010001J22Rik     | RIKEN cDNA 2010001J22 gene                                                     | 2.006 | 0.0042332 |
| 1434967_at   | Zswim6            | zinc finger, SWIM domain containing 6                                          | 2.007 | 0.0016823 |
| 1443522_s_at | Phip              | pleckstrin homology domain interacting protein                                 | 2.007 | 0.0237772 |
| 1435740_at   | ENSMUSG0000072684 | predicted gene, ENSMUSG0000072684                                              | 2.007 | 0.0037874 |
| 1425676_a_at | Elovl1            | elongation of very long chain fatty acids (FEN1/Elo2, SUR4/Elo3, yeast)-like 1 | 2.009 | 0.0268669 |
| 1450850_at   | Ezr               | ezrin                                                                          | 2.009 | 0.003434  |
| 1422491_a_at | Bnip2             | BCL2/adenovirus E1B interacting protein 2                                      | 2.009 | 0.0019412 |
| 1455339_at   | Fkbp15            | FK506 binding protein 15                                                       | 2.011 | 0.0017379 |
| 1437200_at   | Fcho2             | FCH domain only 2                                                              | 2.011 | 0.0019865 |
| 1421845_at   | Golph3            | golgi phosphoprotein 3                                                         | 2.011 | 0.0063548 |
| 1441320_a_at | AI413194          | expressed sequence AI413194                                                    | 2.013 | 0.0076013 |
| 1448174_at   | Cul1              | cullin 1                                                                       | 2.013 | 0.0018544 |
| 1434330_at   | Tbcel             | tubulin folding cofactor E-like                                                | 2.013 | 0.0047645 |

|                           |           |                                                                      |       |           |
|---------------------------|-----------|----------------------------------------------------------------------|-------|-----------|
| AFFX-GapdhMur/M32599_M_at | Gapdh     | glyceraldehyde-3-phosphate dehydrogenase                             | 2.016 | 0.0115321 |
| 1425787_a_at              | Syt13     | synaptotagmin-like 3                                                 | 2.017 | 0.0034033 |
| 1449702_at                | Zfand2a   | zinc finger, AN1-type domain 2A                                      | 2.018 | 0.0102368 |
| 1449755_at                | D7Ert183e | DNA segment, Chr 7, ERATO Doi 183, expressed                         | 2.019 | 0.0040215 |
| 1453913_a_at              | Tap2      | transporter 2, ATP-binding cassette, sub-family B (MDR/TAP)          | 2.019 | 0.0127731 |
| 1416418_at                | Gabarapl1 | gamma-aminobutyric acid (GABA(A)) receptor-associated protein-like 1 | 2.020 | 0.0095477 |
| 1450033_a_at              | Stat1     | signal transducer and activator of transcription 1                   | 2.021 | 0.0105252 |
| 1460273_a_at              | Naip2     | NLR family, apoptosis inhibitory protein 2                           | 2.021 | 0.0044326 |
| 1425466_at                | Senp2     | SUMO/sentrin specific peptidase 2                                    | 2.021 | 0.0032081 |
| 1455337_at                | Fgd4      | FYVE, RhoGEF and PH domain containing 4                              | 2.022 | 0.0026353 |
| 1438069_a_at              | Rbm5      | RNA binding motif protein 5                                          | 2.023 | 0.0282923 |
| 1450315_at                | V1rd14    | vomer nasal 1 receptor, D14                                          | 2.024 | 0.0059216 |
| 1433561_at                | Centb2    | centaurin, beta 2                                                    | 2.025 | 0.0034286 |
| 1441342_at                | Dpp4      | dipeptidylpeptidase 4                                                | 2.025 | 0.0221322 |
| 1437886_at                | Klhl6     | kelch-like 6 (Drosophila)                                            | 2.026 | 0.0298527 |

|              |                |                                                |       |           |
|--------------|----------------|------------------------------------------------|-------|-----------|
| 1449626_s_at | Acbd4          | acyl-Coenzyme A binding domain containing 4    | 2.026 | 0.0022359 |
| 1435055_a_at | Tom1           | target of myb1 homolog (chicken)               | 2.028 | 0.0093018 |
| 1452193_a_at | Wasl           | Wiskott-Aldrich syndrome-like (human)          | 2.028 | 0.0034788 |
| 1422453_at   | Prpf8          | pre-mRNA processing factor 8                   | 2.028 | 0.0159912 |
| 1426644_at   | Tbc1d20        | TBC1 domain family, member 20                  | 2.029 | 0.0024409 |
| 1431391_at   | Ralgps1        | Ral GEF with PH domain and SH3 binding motif 1 | 2.029 | 0.006431  |
| 1423117_at   | Pum1           | pumilio 1 (Drosophila)                         | 2.029 | 0.0213114 |
| 1419906_at   | Hpgd           | hydroxyprostaglandin dehydrogenase 15 (NAD)    | 2.030 | 0.0091608 |
| 1448119_at   | Bpgm           | 2,3-bisphosphoglycerate mutase                 | 2.030 | 0.0072961 |
| 1423678_at   | BC017643       | cDNA sequence BC017643                         | 2.031 | 0.0090059 |
| 1434828_at   | B430201A12 Rik | RIKEN cDNA B430201A12 gene                     | 2.032 | 0.0021055 |
| 1430634_a_at | Pfkp           | phosphofructokinase, platelet                  | 2.033 | 0.0101603 |
| 1436851_at   | Pkn1           | protein kinase N1                              | 2.034 | 0.0066093 |
| 1422670_at   | Rnd2           | Rho family GTPase 2                            | 2.039 | 0.0034959 |
| 1437892_at   | Zkscan3        | zinc finger with KRAB and SCAN domains 3       | 2.039 | 0.0380536 |
| 1448161_a_at | Clcn4-2        | chloride channel 4-2                           | 2.042 | 0.002658  |

|              |         |                                                                      |       |           |
|--------------|---------|----------------------------------------------------------------------|-------|-----------|
| 1426598_at   | Uty     | ubiquitously transcribed tetratricopeptide repeat gene, Y chromosome | 2.043 | 0.0216754 |
| 1426584_a_at | Sord    | sorbitol dehydrogenase                                               | 2.044 | 0.0038705 |
| 1452532_x_at | Ceacam1 | carcinoembryonic antigen-related cell adhesion molecule 1            | 2.045 | 0.012515  |
| 1433770_at   | Dpysl2  | dihydropyrimidinate-like 2                                           | 2.045 | 0.0047039 |
| 1450223_at   | Apaf1   | apoptotic peptidase activating factor 1                              | 2.046 | 0.0282856 |
| 1451328_at   | Pcxl3   | pecanex-like 3 (Drosophila)                                          | 2.046 | 0.0106827 |
| 1418000_a_at | Itn2b   | integral membrane protein 2B                                         | 2.046 | 0.0047437 |
| 1456821_at   | NA      | NA                                                                   | 2.047 | 0.0077886 |
| 1419296_at   | Arhgap4 | Rho GTPase activating protein 4                                      | 2.047 | 0.0319462 |
| 1460204_at   | Tec     | cytoplasmic tyrosine kinase, Dscr28C related (Drosophila)            | 2.049 | 0.0067661 |
| 1434743_x_at | Rusc1   | RUN and SH3 domain containing 1                                      | 2.049 | 0.001944  |
| 1443057_at   | NA      | NA                                                                   | 2.051 | 0.0062583 |
| 1449934_at   | Pura    | purine rich element binding protein A                                | 2.052 | 0.0110079 |
| 1435362_at   | Foxj3   | forkhead box J3                                                      | 2.052 | 0.001983  |
| 1416011_x_at | Ehd1    | EH-domain containing 1                                               | 2.053 | 0.0055617 |

|                             |               |                                                                       |       |           |
|-----------------------------|---------------|-----------------------------------------------------------------------|-------|-----------|
| 1439656_at                  | Pafah1b1      | platelet-activating factor acetylhydrolase, isoform 1b, beta1 subunit | 2.054 | 0.008331  |
| 1456587_x_at                | 2010005J08Rik | RIKEN cDNA 2010005J08 gene                                            | 2.055 | 0.0049956 |
| 1439452_x_at                | Dnpep         | aspartyl aminopeptidase                                               | 2.055 | 0.0068665 |
| 1431035_at                  | Daam1         | dishevelled associated activator of morphogenesis 1                   | 2.057 | 0.0200392 |
| AFFX-b-ActinMur/M12481_M_at | Actb          | actin, beta                                                           | 2.058 | 0.0162386 |
| 1447602_x_at                | Sulf2         | sulfatase 2                                                           | 2.060 | 0.0104586 |
| 1441229_at                  | D230019N24Rik | RIKEN cDNA D230019N24 gene                                            | 2.061 | 0.01087   |
| 1416380_at                  | Mov10         | Moloney leukemia virus 10                                             | 2.062 | 0.0028871 |
| 1428897_at                  | 2610029I01Rik | RIKEN cDNA 2610029I01 gene                                            | 2.063 | 0.0104926 |
| 1435637_at                  | Itfg1         | integrin alpha FG-GAP repeat containing 1                             | 2.064 | 0.0409652 |
| 1426151_a_at                | Stx3          | syntaxin 3                                                            | 2.064 | 0.0055444 |
| 1417999_at                  | Itm2b         | integral membrane protein 2B                                          | 2.064 | 0.0015888 |
| 1450864_at                  | Calm3         | calmodulin 3                                                          | 2.065 | 0.003076  |
| 1416046_a_at                | Fuca2         | fucosidase, alpha-L-2, plasma                                         | 2.066 | 0.0253727 |
| 1415952_at                  | Mark2         | MAP/microtubule affinity-regulating kinase 2                          | 2.066 | 0.0013462 |
| 1419097_a_at                | Stom          | stomatin                                                              | 2.067 | 0.0190743 |

|              |         |                                                                                              |       |           |
|--------------|---------|----------------------------------------------------------------------------------------------|-------|-----------|
| 1436395_at   | Card6   | caspase recruitment domain family, member 6                                                  | 2.068 | 0.0018529 |
| 1418486_at   | Vnn1    | vanin 1                                                                                      | 2.068 | 0.0333695 |
| 1451716_at   | Mafb    | v-maf musculoaponeurotic fibrosarcoma oncogene family, protein B (avian)                     | 2.068 | 0.0047893 |
| 1425463_at   | Gata6   | GATA binding protein 6                                                                       | 2.069 | 0.0025497 |
| 1429117_at   | Tradd   | TNFRSF1A-associated via death domain                                                         | 2.071 | 0.0050388 |
| 1453039_at   | Zfp335  | zinc finger protein 335                                                                      | 2.071 | 0.005267  |
| 1430309_at   | Nipbl   | Nipped-B homolog (Drosophila)                                                                | 2.072 | 0.0238091 |
| 1448864_at   | Snrk    | SNF related kinase                                                                           | 2.074 | 0.0074153 |
| 1456610_at   | Jmjd3   | jumonji domain containing 3                                                                  | 2.075 | 0.0018892 |
| 1460096_at   | NA      | NA                                                                                           | 2.076 | 0.0128836 |
| 1437132_x_at | Nedd9   | neural precursor cell expressed, developmentally down-regulated gene 9                       | 2.077 | 0.0014884 |
| 1436128_at   | Plekha8 | pleckstrin homology domain containing, family A (phosphoinositide binding specific) member 8 | 2.077 | 0.004309  |
| 1419022_a_at | Eno1    | enolase 1, alpha non-neuron                                                                  | 2.077 | 0.0187496 |
| 1422959_s_at | Rnf114  | ring finger protein 114                                                                      | 2.079 | 0.0036012 |

|              |               |                                                                              |       |           |
|--------------|---------------|------------------------------------------------------------------------------|-------|-----------|
| 1441242_at   | NA            | NA                                                                           | 2.079 | 0.0127535 |
| 1416759_at   | Mical1        | microtubule associated monoxygenase, calponin and LIM domain containing 1    | 2.080 | 0.0071656 |
| 1459332_at   | Itch          | itchy, E3 ubiquitin protein ligase                                           | 2.082 | 0.0053947 |
| 1433593_at   | Ypel5         | yippee-like 5 (Drosophila)                                                   | 2.082 | 0.0096849 |
| 1460341_at   | Plekhb2       | pleckstrin homology domain containing, family B (evectins) member 2          | 2.083 | 0.0047873 |
| 1422661_at   | Lgals8        | lectin, galactose binding, soluble 8                                         | 2.084 | 0.0024946 |
| 1426445_at   | Ctage5        | CTAGE family, member 5                                                       | 2.084 | 0.0033904 |
| 1459354_at   | NA            | NA                                                                           | 2.084 | 0.0048254 |
| 1438167_x_at | Flcn          | folliculin                                                                   | 2.085 | 0.0027715 |
| 1423786_at   | 8430410A17Rik | RIKEN cDNA 8430410A17 gene                                                   | 2.085 | 0.0136144 |
| 1422736_at   | Ranbp9        | RAN binding protein 9                                                        | 2.086 | 0.0054277 |
| 1444525_at   | NA            | NA                                                                           | 2.086 | 0.0272979 |
| 1453120_at   | Txndc13       | thioredoxin domain containing 13                                             | 2.087 | 0.0224193 |
| 1415936_at   | Bcar3         | breast cancer anti estrogen resistance 3                                     | 2.087 | 0.0015556 |
| 1425515_at   | Pik3r1        | phosphatidylinositol 3-kinase, regulatory subunit, polypeptide 1 (p85 alpha) | 2.087 | 0.007568  |
| 1448943_at   | Nrp1          | neuropilin 1                                                                 | 2.088 | 0.0054686 |

|              |          |                                                                                                                  |       |           |
|--------------|----------|------------------------------------------------------------------------------------------------------------------|-------|-----------|
| 1444762_at   | NA       | NA                                                                                                               | 2.088 | 0.0061627 |
| 1418144_a_at | Pip5k1a  | phosphatidylinositol-4-phosphate 5-kinase, type 1 alpha                                                          | 2.088 | 0.0048731 |
| 1456223_at   | NA       | NA                                                                                                               | 2.088 | 0.0182453 |
| 1456981_at   | Tmc7     | transmembrane channel-like gene family 7                                                                         | 2.088 | 0.0063927 |
| 1434873_a_at | Centb1   | centaurin, beta 1                                                                                                | 2.089 | 0.029272  |
| 1445897_s_at | Ifi35    | interferon-induced protein 35                                                                                    | 2.090 | 0.0011505 |
| 1451390_s_at | Zfand2b  | zinc finger, AN1 type domain 2B                                                                                  | 2.091 | 0.0027245 |
| 1448939_at   | Usp25    | ubiquitin specific peptidase 25                                                                                  | 2.091 | 0.0048325 |
| 1458618_at   | NA       | NA                                                                                                               | 2.092 | 0.0076971 |
| 1429166_s_at | Clmn     | calmin                                                                                                           | 2.093 | 0.0043051 |
| 1420824_at   | Sema4d   | sema domain, immunoglobulin domain (Ig), transmembrane domain (TM) and short cytoplasmic domain, (semaphorin) 4D | 2.093 | 0.0393326 |
| 1431060_at   | Peli1    | pellino 1                                                                                                        | 2.093 | 0.0245143 |
| 1433897_at   | AI597468 | expressed sequence AI597468                                                                                      | 2.094 | 0.002148  |
| 1435631_x_at | Sh3glb1  | SH3-domain GRB2-like B1 (endophilin)                                                                             | 2.095 | 0.0223967 |
| 1449018_at   | Pfn1     | profilin 1                                                                                                       | 2.096 | 0.0018771 |



|              |                   |                                                                           |       |           |
|--------------|-------------------|---------------------------------------------------------------------------|-------|-----------|
| 1428792_at   | Bcas1             | breast carcinoma amplified sequence 1                                     | 2.096 | 0.0067654 |
| 1434253_s_at | Tmcc3             | transmembrane and coiled coil domains 3                                   | 2.096 | 0.0011658 |
| 1426894_s_at | C230093N12<br>Rik | RIKEN cDNA C230093N12 gene                                                | 2.097 | 0.0039757 |
| 1417180_at   | Pcsk7             | proprotein convertase subtilisin/kexin type 7                             | 2.098 | 0.0014229 |
| 1457528_at   | Slc4a7            | solute carrier family 4, sodium bicarbonate cotransporter, member 7       | 2.100 | 0.0409889 |
| 1458616_at   | NA                | NA                                                                        | 2.101 | 0.0021941 |
| 1438116_x_at | Slc9a3r1          | solute carrier family 9 (sodium/hydrogen exchanger), member 3 regulator 1 | 2.102 | 0.0010119 |
| 1431704_a_at | Ralgps2           | Ral GEF with PH domain and SH3 binding motif 2                            | 2.102 | 0.0045498 |
| 1426810_at   | Jmjd1a            | jumonji domain containing 1A                                              | 2.103 | 0.001872  |
| 1454967_at   | NA                | NA                                                                        | 2.103 | 0.0011265 |
| 1431997_at   | 3000002C10R<br>ik | RIKEN cDNA 3000002C10 gene                                                | 2.103 | 0.0134646 |
| 1436933_at   | NA                | NA                                                                        | 2.104 | 0.0014182 |
| 1441617_at   | Med15             | mediator complex subunit 15                                               | 2.105 | 0.0016316 |
| 1457364_at   | NA                | NA                                                                        | 2.105 | 0.0057335 |
| 1425678_a_at | Snrk              | SNF related kinase                                                        | 2.105 | 0.001358  |
| 1448128_at   | Ctsa              | cathepsin A                                                               | 2.106 | 0.0230167 |

|              |               |                                                                           |       |           |
|--------------|---------------|---------------------------------------------------------------------------|-------|-----------|
| 1435772_at   | Rpl18         | ribosomal protein L18                                                     | 2.107 | 0.0013052 |
| 1452124_at   | Ank3          | ankyrin 3, epithelial                                                     | 2.107 | 0.0107275 |
| 1450984_at   | Tjp2          | tight junction protein 2                                                  | 2.107 | 0.0043443 |
| 1428729_at   | Krit1         | KRIT1, ankyrin repeat containing                                          | 2.108 | 0.0026077 |
| 1436984_at   | Abi2          | abl-interactor 2                                                          | 2.109 | 0.0079006 |
| 1426733_at   | Itpk1         | inositol 1,3,4-triphosphate 5/6 kinase                                    | 2.110 | 0.0014749 |
| 1450247_a_at | Scamp5        | secretory carrier membrane protein 5                                      | 2.110 | 0.0273577 |
| 1447615_at   | NA            | NA                                                                        | 2.110 | 0.0186738 |
| 1421396_at   | Pcsk1         | proprotein convertase subtilisin/kexin type 1                             | 2.112 | 0.0088957 |
| 1449385_at   | Hsd17b6       | hydroxysteroid (17-beta) dehydrogenase 6                                  | 2.112 | 0.0360995 |
| 1416830_at   | 0610031J06Rik | RIKEN cDNA 0610031J06 gene                                                | 2.112 | 0.0067078 |
| 1417219_s_at | Tmsb10        | thymosin, beta 10                                                         | 2.112 | 0.0015985 |
| 1422438_at   | Ephx1         | epoxide hydrolase 1, microsomal                                           | 2.113 | 0.0055694 |
| 1416529_at   | Emp1          | epithelial membrane protein 1                                             | 2.114 | 0.0033525 |
| 1450982_at   | Slc9a3r1      | solute carrier family 9 (sodium/hydrogen exchanger), member 3 regulator 1 | 2.114 | 0.0023296 |
| 1460517_at   | 9130409J20Rik | RIKEN cDNA 9130409J20 gene                                                | 2.114 | 0.0025562 |
| 1439610_at   | Rab27b        | RAB27b, member RAS oncogene family                                        | 2.115 | 0.008008  |

|              |                |                                                                           |       |           |
|--------------|----------------|---------------------------------------------------------------------------|-------|-----------|
| 1418817_at   | Chmp1b         | chromatin modifying protein 1B                                            | 2.115 | 0.0015218 |
| 1429427_s_at | Tcf7l2         | transcription factor 7-like 2, T-cell specific, HMG-box                   | 2.116 | 0.0026387 |
| 1436994_a_at | Hist1h1c       | histone cluster 1, H1c                                                    | 2.116 | 0.0032451 |
| 1450031_at   | Aff4           | AF4/FMR2 family, member 4                                                 | 2.118 | 0.0013519 |
| 1455067_at   | Psd4           | pleckstrin and Sec7 domain containing 4                                   | 2.118 | 0.0086351 |
| 1434894_at   | Zc3h13         | zinc finger CCCH type containing 13                                       | 2.119 | 0.0016602 |
| 1433293_at   | 1500032O14 Rik | RIKEN cDNA 1500032O14 gene                                                | 2.119 | 0.0353777 |
| 1418831_at   | Pkp3           | plakophilin 3                                                             | 2.120 | 0.0029414 |
| 1443153_at   | NA             | NA                                                                        | 2.120 | 0.0025771 |
| 1424246_a_at | Tes            | testis derived transcript                                                 | 2.120 | 0.0058087 |
| 1428988_at   | Abcc3          | ATP-binding cassette, sub-family C (CFTR/MRP), member 3                   | 2.121 | 0.0365391 |
| 1422584_at   | Skiv2l         | superkiller viralicidic activity 2-like (S. cerevisiae)                   | 2.121 | 0.006407  |
| 1424268_at   | Smox           | spermine oxidase                                                          | 2.121 | 0.0032592 |
| 1451601_a_at | Spns2          | spinstar homolog 2 (Drosophila)                                           | 2.122 | 0.0028923 |
| 1438115_a_at | Slc9a3r1       | solute carrier family 9 (sodium/hydrogen exchanger), member 3 regulator 1 | 2.125 | 0.0009505 |
| 1455476_a_at | Gse1           | genetic suppressor element 1                                              | 2.126 | 0.0013703 |
| 1449822_at   | Atoh1          | atonal homolog 1 (Drosophila)                                             | 2.126 | 0.0042036 |

|                             |               |                                                    |       |           |
|-----------------------------|---------------|----------------------------------------------------|-------|-----------|
| 1435768_at                  | Arid4b        | AT rich interactive domain 4B (RBP1-like)          | 2.127 | 0.0011431 |
| 1432129_a_at                | Prrx1         | paired related homeobox 1                          | 2.128 | 0.0067973 |
| 1419971_s_at                | Slc35a5       | solute carrier family 35, member A5                | 2.129 | 0.0047279 |
| 1453345_at                  | Npal1         | NIPA-like domain containing 1                      | 2.129 | 0.0032128 |
| 1444456_at                  | 9030425P06Rik | RIKEN cDNA 9030425P06 gene                         | 2.130 | 0.0070709 |
| 1440916_at                  | 2510049J12Rik | RIKEN cDNA 2510049J12 gene                         | 2.130 | 0.0020526 |
| 1434402_at                  | Samd8         | sterile alpha motif domain containing 8            | 2.131 | 0.0024638 |
| 1417981_at                  | Insig2        | insulin induced gene 2                             | 2.131 | 0.0019673 |
| 1448892_at                  | Dock7         | dedicator of cytokinesis 7                         | 2.131 | 0.0016929 |
| 1421679_a_at                | Cdkn1a        | cyclin-dependent kinase inhibitor 1A (P21)         | 2.132 | 0.0045659 |
| 1449151_at                  | Pctk3         | PCTAIRE-motif protein kinase 3                     | 2.133 | 0.0084955 |
| 1456199_x_at                | Ranbp9        | RAN binding protein 9                              | 2.133 | 0.0094502 |
| 1449988_at                  | Gimap1        | GTPase, IMAP family member 1                       | 2.134 | 0.0177882 |
| AFFX-b-ActinMur/M12481_5_at | Actb          | actin, beta                                        | 2.134 | 0.0136864 |
| 1448145_at                  | Wwp2          | WW domain containing E3 ubiquitin protein ligase 2 | 2.136 | 0.0013633 |
| 1450919_at                  | Mpp1          | membrane protein, palmitoylated                    | 2.137 | 0.0066405 |
| 1418186_at                  | Gstt1         | glutathione S-transferase, theta 1                 | 2.137 | 0.0033343 |

|              |                |                                                                |       |           |
|--------------|----------------|----------------------------------------------------------------|-------|-----------|
| 1427742_a_at | Klf6           | Kruppel-like factor 6                                          | 2.137 | 0.0017623 |
| 1450138_a_at | Serpinb6a      | serine (or cysteine) peptidase inhibitor, clade B, member 6a   | 2.137 | 0.0031612 |
| 1450007_at   | 1500003O03 Rik | RIKEN cDNA 1500003O03 gene                                     | 2.138 | 0.0073616 |
| 1423961_at   | Wdr26          | WD repeat domain 26                                            | 2.139 | 0.0025526 |
| 1437483_at   | Zfp513         | zinc finger protein 513                                        | 2.140 | 0.0042413 |
| 1458185_at   | Thap4          | THAP domain containing 4                                       | 2.140 | 0.0067455 |
| 1457378_at   | NA             | NA                                                             | 2.141 | 0.0292826 |
| 1419232_a_at | Apoa1          | apolipoprotein A-I                                             | 2.142 | 0.0021282 |
| 1453960_a_at | Capzb          | capping protein (actin filament) muscle Z-line, beta           | 2.142 | 0.0018942 |
| 1452694_at   | lhpk1          | inositol hexaphosphate kinase 1                                | 2.144 | 0.0010729 |
| 1418649_at   | Egln3          | EGL nine homolog 3 (C. elegans)                                | 2.144 | 0.002145  |
| 1448396_at   | Tmem131        | transmembrane protein 131                                      | 2.144 | 0.0045968 |
| 1452823_at   | Gstk1          | glutathione S-transferase kappa 1                              | 2.145 | 0.0145159 |
| 1434904_at   | Hivep2         | human immunodeficiency virus type I enhancer binding protein 2 | 2.145 | 0.0093528 |
| 1425036_a_at | Tnrc6a         | trinucleotide repeat containing 6a                             | 2.145 | 0.0021754 |
| 1418823_at   | Arf6           | ADP-ribosylation factor 6                                      | 2.145 | 0.0060445 |
| 1439956_at   | NA             | NA                                                             | 2.146 | 0.0142781 |

|              |          |                                                              |       |           |
|--------------|----------|--------------------------------------------------------------|-------|-----------|
| 1448037_at   | NA       | NA                                                           | 2.146 | 0.0018681 |
| 1418154_at   | N4bp1    | NEDD4 binding protein 1                                      | 2.147 | 0.0124217 |
| 1425025_at   | Tmem106a | transmembrane protein 106A                                   | 2.147 | 0.0016035 |
| 1422771_at   | Smad6    | MAD homolog 6 (Drosophila)                                   | 2.147 | 0.0009611 |
| 1436766_at   | Luc7l2   | LUC7-like 2 (S. cerevisiae)                                  | 2.148 | 0.017773  |
| 1418479_at   | Vps54    | vacuolar protein sorting 54 (yeast)                          | 2.148 | 0.0008887 |
| 1427711_a_at | Ceacam1  | carcinoembryonic antigen-related cell adhesion molecule 1    | 2.149 | 0.0234126 |
| 1453737_at   | Wipf2    | WAS/WASL interacting protein family, member 2                | 2.149 | 0.0038394 |
| 1424245_at   | Ces2     | carboxylesterase 2                                           | 2.149 | 0.0045457 |
| 1455865_at   | Insm1    | insulinoma-associated 1                                      | 2.149 | 0.0366588 |
| 1436753_at   | Adck5    | aarF domain containing kinase 5                              | 2.150 | 0.0080081 |
| 1424740_at   | Creb3    | cAMP responsive element binding protein 3                    | 2.150 | 0.0028617 |
| 1419508_at   | Ripk1    | receptor (TNFRSF)-interacting serine-threonine kinase 1      | 2.151 | 0.0047723 |
| 1435342_at   | Kcnk6    | potassium inwardly-rectifying channel, subfamily K, member 6 | 2.153 | 0.0032057 |
| 1424059_at   | Suv420h2 | suppressor of variegation 4-20 homolog 2 (Drosophila)        | 2.154 | 0.001314  |

|              |         |                                                                       |       |           |
|--------------|---------|-----------------------------------------------------------------------|-------|-----------|
| 1449289_a_at | Phf20l1 | PHD finger protein 20-like 1                                          | 2.155 | 0.0034931 |
| 1438673_at   | Slc4a7  | solute carrier family 4, sodium bicarbonate cotransporter, member 7   | 2.155 | 0.01836   |
| 1422846_at   | Rbp2    | retinol binding protein 2, cellular                                   | 2.156 | 0.0161716 |
| 1439298_at   | NA      | NA                                                                    | 2.156 | 0.0033332 |
| 1459701_x_at | NA      | NA                                                                    | 2.156 | 0.0141013 |
| 1426831_at   | Ahcyl1  | S-adenosylhomocysteine hydrolase-like 1                               | 2.156 | 0.0032837 |
| 1417884_at   | Slc16a6 | solute carrier family 16 (monocarboxylic acid transporters), member 6 | 2.157 | 0.0082963 |
| 1423783_at   | Tor2a   | torsin family 2, member A                                             | 2.157 | 0.0207078 |
| 1426094_at   | Rhbd1   | rhomboid, veinlet-like 1 (Drosophila)                                 | 2.158 | 0.0176237 |
| 1434725_at   | Gramd1c | GRAM domain containing 1C                                             | 2.160 | 0.0045796 |
| 1448741_at   | Slc3a1  | solute carrier family 3, member 1                                     | 2.160 | 0.0094216 |
| 1453240_a_at | Gcap14  | granule cell antiserum positive 14                                    | 2.162 | 0.0277057 |
| 1419103_a_at | Abhd6   | abhydrolase domain containing 6                                       | 2.163 | 0.0061025 |
| 1420909_at   | Vegfa   | vascular endothelial growth factor A                                  | 2.163 | 0.0046046 |
| 1423596_at   | Nek6    | NIMA (never in mitosis gene a)-related expressed kinase 6             | 2.164 | 0.0014291 |

|                           |               |                                                    |       |           |
|---------------------------|---------------|----------------------------------------------------|-------|-----------|
| 1424176_a_at              | Anxa4         | annexin A4                                         | 2.164 | 0.002485  |
| 1415677_at                | Dhrs1         | dehydrogenase/reductase (SDR family) member 1      | 2.165 | 0.0497918 |
| 1426165_a_at              | Casp3         | caspase 3                                          | 2.165 | 0.015194  |
| AFFX-GapdhMur/M32599_5_at | Gapdh         | glyceraldehyde-3-phosphate dehydrogenase           | 2.167 | 0.0094093 |
| 1417388_at                | Bex2          | brain expressed X-linked 2                         | 2.167 | 0.0097754 |
| 1437252_at                | Gats          | opposite strand transcription unit to Stag3        | 2.169 | 0.0019627 |
| 1437868_at                | BC023892      | cDNA sequence BC023892                             | 2.169 | 0.0012138 |
| 1452920_a_at              | Ppil2         | peptidylprolyl isomerase (cyclophilin)-like 2      | 2.169 | 0.0008622 |
| 1428151_x_at              | Ccbl1         | cysteine conjugate-beta lyase 1                    | 2.170 | 0.0024236 |
| 1447744_s_at              | 1700110K17Rik | RIKEN cDNA 1700110K17 gene                         | 2.171 | 0.004565  |
| 1458218_s_at              | Pde7a         | phosphodiesterase 7A                               | 2.171 | 0.0008369 |
| 1419817_s_at              | Ankzf1        | ankyrin repeat and zinc finger domain containing 1 | 2.175 | 0.0044014 |
| 1418838_at                | Abcd1         | ATP-binding cassette, sub-family D (ALD), member 1 | 2.175 | 0.0057456 |
| 1426975_at                | Os9           | amplified in osteosarcoma                          | 2.176 | 0.0073371 |
| 1426098_a_at              | Cast          | calpastatin                                        | 2.176 | 0.005457  |
| 1449419_at                | Dock8         | dedicator of cytokinesis 8                         | 2.177 | 0.0008288 |
| 1455500_at                | Rnf213        | ring finger protein 213                            | 2.178 | 0.0024538 |



|              |                   |                                                              |       |           |
|--------------|-------------------|--------------------------------------------------------------|-------|-----------|
| 1427261_at   | Wwc1              | WW, C2 and coiled-coil domain containing 1                   | 2.178 | 0.0019764 |
| 1415737_at   | Rfk               | riboflavin kinase                                            | 2.179 | 0.0012384 |
| 1419024_at   | Ptp4a1            | protein tyrosine phosphatase 4a1                             | 2.179 | 0.0135385 |
| 1441075_at   | Nostrin           | nitric oxide synthase trafficker                             | 2.179 | 0.0071623 |
| 1460729_at   | Rock1             | Rho-associated coiled-coil containing protein kinase 1       | 2.181 | 0.0080808 |
| 1459151_x_at | Ifi35             | interferon-induced protein 35                                | 2.183 | 0.002691  |
| 1452213_at   | Tex2              | testis expressed gene 2                                      | 2.184 | 0.0040031 |
| 1455340_at   | D030011O10<br>Rik | RIKEN cDNA D030011O10 gene                                   | 2.187 | 0.0020065 |
| 1451192_a_at | Ttc4              | tetratricopeptide repeat domain 4                            | 2.187 | 0.004     |
| 1422469_at   | Tbk1              | TANK-binding kinase 1                                        | 2.190 | 0.0024737 |
| 1417666_at   | Dnttip1           | deoxynucleotidyltransferase, terminal, interacting protein 1 | 2.192 | 0.0010015 |
| 1430533_a_at | Ctnnb1            | catenin (cadherin associated protein), beta 1                | 2.192 | 0.0017774 |
| 1428565_at   | Unkl              | unkempt-like (Drosophila)                                    | 2.194 | 0.0058161 |
| 1451119_a_at | Fbln1             | fibulin 1                                                    | 2.194 | 0.015226  |
| 1417611_at   | Tmem37            | transmembrane protein 37                                     | 2.194 | 0.0161354 |
| 1424951_at   | Baiap2l1          | BAI1-associated protein 2-like 1                             | 2.194 | 0.0018669 |

|              |          |                                                                  |       |           |
|--------------|----------|------------------------------------------------------------------|-------|-----------|
| 1421064_at   | Mpp5     | membrane protein, palmitoylated 5 (MAGUK p55 subfamily member 5) | 2.195 | 0.0012719 |
| 1417061_at   | Slc40a1  | solute carrier family 40 (iron-regulated transporter), member 1  | 2.196 | 0.0096531 |
| 1427406_at   | Trip11   | thyroid hormone receptor interactor 11                           | 2.198 | 0.0013893 |
| 1457209_at   | Ddhd2    | DDHD domain containing 2                                         | 2.199 | 0.0182716 |
| 1430165_at   | Stk17b   | serine/threonine kinase 17b (apoptosis-inducing)                 | 2.201 | 0.0020796 |
| 1435880_at   | Ankrd50  | ankrin repeat domain 50                                          | 2.201 | 0.0009859 |
| 1452237_at   | Hrb      | HIV-1 Rev binding protein                                        | 2.202 | 0.002995  |
| 1422677_at   | Dgat2    | diacylglycerol O-acyltransferase 2                               | 2.202 | 0.0013084 |
| 1424646_at   | Uck1     | uridine-cytidine kinase 1-like 1                                 | 2.202 | 0.0008373 |
| 1438118_x_at | Vim      | vimentin                                                         | 2.204 | 0.0059732 |
| 1452186_at   | Rbm5     | RNA binding motif protein 5                                      | 2.205 | 0.0006874 |
| 1456927_at   | Mast2    | microtubule associated serine/threonine kinase 2                 | 2.205 | 0.0058732 |
| 1455128_x_at | Tnrc6a   | trinucleotide repeat containing 6a                               | 2.205 | 0.0012039 |
| 1423875_at   | AI450540 | expressed sequence AI450540                                      | 2.206 | 0.0023954 |
| 1419147_at   | Rec8     | REC8 homolog (yeast)                                             | 2.206 | 0.0015377 |

|              |                   |                                                                                         |       |           |
|--------------|-------------------|-----------------------------------------------------------------------------------------|-------|-----------|
| 1441331_at   | A230061C15<br>Rik | RIKEN cDNA<br>A230061C15<br>gene                                                        | 2.207 | 0.0075659 |
| 1456413_at   | Pde4dip           | phosphodiesterase<br>4D interacting<br>protein<br>(myomegalin)                          | 2.208 | 0.0020284 |
| 1419091_a_at | Anxa2             | annexin A2                                                                              | 2.208 | 0.0010929 |
| 1419879_s_at | Trim25            | tripartite motif-<br>containing 25                                                      | 2.209 | 0.0022767 |
| 1424932_at   | Egfr              | epidermal growth<br>factor receptor                                                     | 2.211 | 0.0016443 |
| 1451196_at   | Ypel5             | yippee-like 5<br>(Drosophila)                                                           | 2.213 | 0.0011779 |
| 1431197_at   | Arl6ip2           | ADP-ribosylation<br>factor-like 6<br>interacting protein<br>2                           | 2.214 | 0.0136415 |
| 1421912_at   | Slc23a1           | solute carrier<br>family 23<br>(nucleobase<br>transporters),<br>member 1                | 2.214 | 0.0043131 |
| 1423269_a_at | Nedd4l            | neural precursor<br>cell expressed,<br>developmentally<br>down-regulated<br>gene 4-like | 2.214 | 0.0008382 |
| 1455105_at   | Ptpn12            | protein tyrosine<br>phosphatase, non<br>receptor type 12                                | 2.214 | 0.0009233 |
| 1434348_at   | Fez2              | fasciculation and<br>elongation protein<br>zeta 2 (zygin II)                            | 2.217 | 0.0016468 |
| 1424349_a_at | Lpgat1            | lysophosphatidylg<br>lycerol<br>acyltransferase 1                                       | 2.217 | 0.0113898 |
| 1429038_at   | Dda1              | DET1 and DDB1<br>associated 1                                                           | 2.218 | 0.0069246 |
| 1425974_a_at | Trim25            | tripartite motif-<br>containing 25                                                      | 2.221 | 0.0007563 |

|              |        |                                                             |       |           |
|--------------|--------|-------------------------------------------------------------|-------|-----------|
| 1448539_a_at | Acy3   | aspartoacylase<br>(aminoacylase) 3                          | 2.221 | 0.0148356 |
| 1439094_at   | Cltc   | clathrin, heavy<br>polypeptide (Hc)                         | 2.222 | 0.0023845 |
| 1452347_at   | Mef2a  | myocyte<br>enhancer factor<br>2A                            | 2.223 | 0.0026354 |
| 1438345_at   | NA     | NA                                                          | 2.224 | 0.0033479 |
| 1425464_at   | Gata6  | GATA binding<br>protein 6                                   | 2.225 | 0.0088166 |
| 1424528_at   | Cgref1 | cell growth<br>regulator with EF<br>hand domain 1           | 2.225 | 0.0415487 |
| 1453740_a_at | Ccnl2  | cyclin L2                                                   | 2.226 | 0.0010612 |
| 1420747_at   | Ppnr   | per-pentamer<br>repeat gene                                 | 2.226 | 0.0055588 |
| 1435769_at   | Akap9  | A kinase (PRKA)<br>anchor protein<br>(yotiao) 9             | 2.226 | 0.0038087 |
| 1434754_at   | Garnl4 | GTPase<br>activating<br>RANGAP domain-<br>like 4            | 2.227 | 0.0016103 |
| 1438610_a_at | Cryz   | crystallin, zeta                                            | 2.228 | 0.0088684 |
| 1417481_at   | Ramp1  | receptor<br>(calcitonin)<br>activity modifying<br>protein 1 | 2.229 | 0.0138493 |
| 1457149_at   | Ttc22  | tetratricopeptide<br>repeat domain 22                       | 2.232 | 0.0029205 |
| 1442199_at   | Btnl2  | butyrophilin-like 2                                         | 2.233 | 0.0119678 |
| 1448189_a_at | Flii   | flightless I<br>homolog<br>(Drosophila)                     | 2.234 | 0.0008372 |
| 1429144_at   | Prei4  | preimplantation<br>protein 4                                | 2.236 | 0.0023843 |
| 1450918_s_at | Src    | Rous sarcoma<br>oncogene                                    | 2.236 | 0.0029804 |

|              |          |                                                              |       |           |
|--------------|----------|--------------------------------------------------------------|-------|-----------|
| 1422824_s_at | Eps8     | epidermal growth factor receptor pathway substrate 8         | 2.236 | 0.0007492 |
| 1444097_at   | Metrn1   | meteorin, glial cell differentiation regulator-like          | 2.237 | 0.0058447 |
| 1427773_a_at | Rabac1   | Rab acceptor 1 (prenylated)                                  | 2.237 | 0.0038703 |
| 1426030_a_at | Apeh     | acylpeptide hydrolase                                        | 2.238 | 0.0016411 |
| 1426313_at   | Bre      | brain and reproductive organ-expressed protein               | 2.239 | 0.0015751 |
| 1429311_at   | Ube2q1   | ubiquitin-conjugating enzyme E2Q (putative) 1                | 2.239 | 0.0024869 |
| 1450479_x_at | Ptpn12   | protein tyrosine phosphatase, non receptor type 12           | 2.240 | 0.0014007 |
| 1418460_at   | Sh3d19   | SH3 domain protein D19                                       | 2.240 | 0.0044238 |
| 1454864_at   | Zfp592   | zinc finger protein 592                                      | 2.241 | 0.0018738 |
| 1448694_at   | Jun      | Jun oncogene                                                 | 2.241 | 0.0012538 |
| 1448301_s_at | Serpib1a | serine (or cysteine) peptidase inhibitor, clade B, member 1a | 2.242 | 0.0008143 |
| 1425359_at   | Mall     | mal, T-cell differentiation protein-like                     | 2.242 | 0.009976  |
| 1418816_at   | Chmp1b   | chromatin modifying protein 1B                               | 2.244 | 0.0012535 |
| 1460315_s_at | Tbk1     | TANK-binding kinase 1                                        | 2.246 | 0.001203  |
| 1437503_a_at | Shisa5   | shisa homolog 5 (Xenopus laevis)                             | 2.246 | 0.0006306 |

|              |         |                                                      |       |           |
|--------------|---------|------------------------------------------------------|-------|-----------|
| 1423391_at   | Git2    | G protein-coupled receptor kinase-interactor 2       | 2.247 | 0.002298  |
| 1419388_at   | Tm4sf20 | transmembrane 4 L six family member 20               | 2.251 | 0.0090827 |
| 1416593_at   | Glrx    | glutaredoxin                                         | 2.254 | 0.0035982 |
| 1417857_at   | Mmaa    | methylmalonic aciduria (cobalamin deficiency) type A | 2.257 | 0.0005846 |
| 1437437_x_at | Dnpep   | aspartyl aminopeptidase                              | 2.257 | 0.0012203 |
| 1451628_a_at | Ank3    | ankyrin 3, epithelial                                | 2.258 | 0.000928  |
| 1416351_at   | Map2k1  | mitogen-activated protein kinase kinase 1            | 2.259 | 0.0027627 |
| 1432195_s_at | Ccnl2   | cyclin L2                                            | 2.260 | 0.001344  |
| 1430388_a_at | Sulf2   | sulfatase 2                                          | 2.260 | 0.0148551 |
| 1416308_at   | Ugdh    | UDP-glucose dehydrogenase                            | 2.261 | 0.0025213 |
| 1427374_at   | Muc3    | mucin 3, intestinal                                  | 2.261 | 0.0026519 |
| 1437756_at   | Gimap9  | GTPase, IMAP family member 9                         | 2.262 | 0.0427556 |
| 1415864_at   | Bpgm    | 2,3-bisphosphoglycerate mutase                       | 2.262 | 0.004222  |
| 1447830_s_at | Rgs2    | regulator of G-protein signaling 2                   | 2.265 | 0.0062811 |
| 1424356_a_at | Metrn1  | meteorin, glial cell differentiation regulator-like  | 2.266 | 0.0027353 |
| 1458148_at   | Nlrc3   | NLR family, CARD domain containing 3                 | 2.266 | 0.0267634 |

|              |               |                                                                 |       |           |
|--------------|---------------|-----------------------------------------------------------------|-------|-----------|
| 1440151_s_at | Edf1          | endothelial differentiation-related factor 1                    | 2.268 | 0.0059134 |
| 1443928_at   | Cytip         | cytohesin 1 interacting protein                                 | 2.270 | 0.0008961 |
| 1429564_at   | Pcgf5         | polycomb group ring finger 5                                    | 2.272 | 0.003626  |
| 1459874_s_at | Mtmr4         | myotubularin related protein 4                                  | 2.272 | 0.0012315 |
| 1420411_a_at | Pi4k2b        | phosphatidylinositol 4-kinase type 2 beta                       | 2.272 | 0.0062766 |
| 1453583_at   | Zzef1         | zinc finger, ZZ-type with EF hand domain 1                      | 2.273 | 0.0013924 |
| 1443721_x_at | Sbno2         | strawberry notch homolog 2 (Drosophila)                         | 2.273 | 0.0029947 |
| 1428881_at   | Klc1          | kinesin light chain 1                                           | 2.274 | 0.004303  |
| 1453313_at   | Sesn3         | sestrin 3                                                       | 2.275 | 0.0041377 |
| 1425900_at   | Hkdc1         | hexokinase domain containing 1                                  | 2.276 | 0.0056659 |
| 1447923_at   | 1810026B05Rik | RIKEN cDNA 1810026B05 gene                                      | 2.277 | 0.0015781 |
| 1456918_at   | Raph1         | Ras association (RalGDS/AF-6) and pleckstrin homology domains 1 | 2.278 | 0.001003  |
| 1422045_a_at | Ptpn12        | protein tyrosine phosphatase, non receptor type 12              | 2.278 | 0.001162  |
| 1426623_a_at | Arhgap17      | Rho GTPase activating protein 17                                | 2.279 | 0.0012359 |
| 1435155_at   | Cgn           | cingulin                                                        | 2.280 | 0.0013651 |

|              |               |                                                              |       |           |
|--------------|---------------|--------------------------------------------------------------|-------|-----------|
| 1417982_at   | Insig2        | insulin induced gene 2                                       | 2.280 | 0.0012588 |
| 1450941_at   | Sdcbp         | syndecan binding protein                                     | 2.281 | 0.0006465 |
| 1446473_at   | 4732418C07Rik | RIKEN cDNA 4732418C07 gene                                   | 2.281 | 0.0005893 |
| 1415919_at   | Npdc1         | neural proliferation, differentiation and control gene 1     | 2.282 | 0.0006477 |
| 1419585_at   | Rp2h          | retinitis pigmentosa 2 homolog (human)                       | 2.282 | 0.0034989 |
| 1416946_a_at | Acaa1a        | acetyl-Coenzyme A acyltransferase 1A                         | 2.283 | 0.0030224 |
| 1437724_x_at | Pitpmn1       | phosphatidylinositol transfer protein, membrane-associated 1 | 2.285 | 0.0011609 |
| 1427418_a_at | Hif1a         | hypoxia inducible factor 1, alpha subunit                    | 2.286 | 0.0006109 |
| 1437048_x_at | Stxbp2        | syntaxin binding protein 2                                   | 2.288 | 0.0023551 |
| 1460367_at   | Hbp1          | high mobility group box transcription factor 1               | 2.288 | 0.003217  |
| 1427407_s_at | Trip11        | thyroid hormone receptor interactor 11                       | 2.293 | 0.0008541 |
| 1435750_at   | Gchfr         | GTP cyclohydrolase I feedback regulator                      | 2.294 | 0.0032426 |
| 1451276_at   | Uhrf1bp1l     | UHRF1 (ICBP90) binding protein 1-like                        | 2.296 | 0.0054304 |
| 1457026_at   | Liph          | lipase, member H                                             | 2.296 | 0.0006063 |



|              |               |                                                                        |       |           |
|--------------|---------------|------------------------------------------------------------------------|-------|-----------|
| 1449330_at   | Pdzd3         | PDZ domain containing 3                                                | 2.299 | 0.0010639 |
| 1436337_at   | 4930420K17Rik | RIKEN cDNA 4930420K17 gene                                             | 2.304 | 0.0033003 |
| 1437683_x_at | Serf2         | small EDRK-rich factor 2                                               | 2.304 | 0.0069699 |
| 1434898_at   | Tnrc6a        | trinucleotide repeat containing 6a                                     | 2.305 | 0.0076081 |
| 1416035_at   | Hif1a         | hypoxia inducible factor 1, alpha subunit                              | 2.305 | 0.0029103 |
| 1449403_at   | Pde9a         | phosphodiesterase 9A                                                   | 2.305 | 0.000627  |
| 1417707_at   | N4bp2l1       | NEDD4 binding protein 2-like 1                                         | 2.307 | 0.0142691 |
| 1450494_x_at | Ceacam1       | carcinoembryonic antigen-related cell adhesion molecule 1              | 2.307 | 0.0127531 |
| 1425584_x_at | NA            | NA                                                                     | 2.310 | 0.0123834 |
| 1441236_at   | Slc9a3        | solute carrier family 9 (sodium/hydrogen exchanger), member 3          | 2.310 | 0.0049968 |
| 1453512_at   | 5830407P18Rik | RIKEN cDNA 5830407P18 gene                                             | 2.311 | 0.005241  |
| 1434592_at   | Slc16a10      | solute carrier family 16 (monocarboxylic acid transporters), member 10 | 2.311 | 0.0211663 |
| 1444320_at   | Ddhd2         | DDHD domain containing 2                                               | 2.311 | 0.0206562 |
| 1416409_at   | Acox1         | acyl-Coenzyme A oxidase 1, palmitoyl                                   | 2.312 | 0.002011  |
| 1427878_at   | 0610010O12Rik | RIKEN cDNA 0610010O12 gene                                             | 2.312 | 0.0020152 |

|              |               |                                            |       |           |
|--------------|---------------|--------------------------------------------|-------|-----------|
| 1460585_x_at | Pisd          | phosphatidylserine decarboxylase           | 2.313 | 0.0010456 |
| 1450093_s_at | Zbtb7a        | zinc finger and BTB domain containing 7a   | 2.313 | 0.0404795 |
| 1458947_at   | NA            | NA                                         | 2.313 | 0.0088526 |
| 1436556_at   | Tmem139       | transmembrane protein 139                  | 2.313 | 0.0014799 |
| 1451680_at   | Srxn1         | sulfiredoxin 1 homolog (S. cerevisiae)     | 2.314 | 0.0026254 |
| 1431299_a_at | 2310014H01Rik | RIKEN cDNA 2310014H01 gene                 | 2.322 | 0.0161452 |
| 1424617_at   | Ifi35         | interferon-induced protein 35              | 2.323 | 0.0024073 |
| 1418352_at   | Hsd17b2       | hydroxysteroid (17-beta) dehydrogenase 2   | 2.325 | 0.0028219 |
| 1450165_at   | Slfn2         | schlafen 2                                 | 2.325 | 0.0039151 |
| 1418364_a_at | Ftl1          | ferritin light chain 1                     | 2.326 | 0.0036806 |
| 1455181_at   | Rasa2         | RAS p21 protein activator 2                | 2.328 | 0.0007089 |
| 1424530_at   | Sec14l2       | SEC14-like 2 (S. cerevisiae)               | 2.329 | 0.0006247 |
| 1451158_at   | Trip12        | thyroid hormone receptor interactor 12     | 2.331 | 0.0132378 |
| 1427610_at   | NA            | NA                                         | 2.332 | 0.010931  |
| 1419194_s_at | Gmfg          | glia maturation factor, gamma              | 2.332 | 0.0071701 |
| 1428385_at   | 8-Mar         | membrane-associated ring finger (C3HC4) 8  | 2.333 | 0.0014878 |
| 1421525_a_at | Naip5         | NLR family, apoptosis inhibitory protein 5 | 2.333 | 0.001721  |

|              |                |                                                                    |       |           |
|--------------|----------------|--------------------------------------------------------------------|-------|-----------|
| 1422702_at   | Azin1          | antizyme inhibitor 1                                               | 2.334 | 0.0018898 |
| 1438294_at   | Atn1           | ataxin 1                                                           | 2.334 | 0.0059901 |
| 1425538_x_at | Ceacam1        | carcinoembryonic antigen-related cell adhesion molecule 1          | 2.336 | 0.030014  |
| 1447926_at   | Arl5a          | ADP-ribosylation factor-like 5A                                    | 2.337 | 0.0010103 |
| 1457793_a_at | Whsc111        | Wolf-Hirschhorn syndrome candidate 1-like 1 (human)                | 2.338 | 0.0044222 |
| 1417978_at   | Eif4e3         | eukaryotic translation initiation factor 4E member 3               | 2.338 | 0.0040476 |
| 1439388_s_at | Bcar1          | breast cancer anti estrogen resistance 1                           | 2.339 | 0.0005587 |
| 1416408_at   | Acox1          | acyl-Coenzyme A oxidase 1, palmitoyl                               | 2.340 | 0.0106332 |
| 1419449_a_at | Gnai2          | guanine nucleotide binding protein (G protein), alpha inhibiting 2 | 2.340 | 0.0012079 |
| 1426225_at   | Rbp4           | retinol binding protein 4, plasma                                  | 2.343 | 0.0023525 |
| 1431173_at   | A930008G19 Rik | RIKEN cDNA A930008G19 gene                                         | 2.343 | 0.0052625 |
| 1452428_a_at | B2m            | beta-2 microglobulin                                               | 2.344 | 0.0014728 |
| 1434205_at   | Ppp2r5c        | protein phosphatase 2, regulatory subunit B (B56), gamma isoform   | 2.344 | 0.0012474 |

|              |               |                                                                                      |       |           |
|--------------|---------------|--------------------------------------------------------------------------------------|-------|-----------|
| 1421840_at   | Abca1         | ATP-binding cassette, sub-family A (ABC1), member 1                                  | 2.346 | 0.0096043 |
| 1423175_s_at | Pard6b        | par-6 (partitioning defective 6) homolog beta (C. elegans)                           | 2.347 | 0.0006703 |
| 1451520_at   | Spg20         | spastic paraplegia 20, spartin (Troyer syndrome) homolog (human)                     | 2.347 | 0.0011523 |
| 1456917_at   | Arfgef1       | ADP-ribosylation factor guanine nucleotide-exchange factor 1 (brefeldin A-inhibited) | 2.348 | 0.0012758 |
| 1417108_at   | Klc4          | kinesin light chain 4                                                                | 2.348 | 0.0009048 |
| 1454149_a_at | Ccnl2         | cyclin L2                                                                            | 2.349 | 0.0006193 |
| 1429694_at   | 4930402H24Rik | RIKEN cDNA 4930402H24 gene                                                           | 2.353 | 0.0079404 |
| 1452815_at   | P2ry10        | purinergic receptor P2Y, G-protein coupled 10                                        | 2.353 | 0.0005301 |
| 1417991_at   | Dio1          | deiodinase, iodothyronine, type I                                                    | 2.354 | 0.0097363 |
| 1457508_at   | C430003N24Rik | RIKEN cDNA C430003N24 gene                                                           | 2.354 | 0.0015162 |
| 1444660_at   | 4932438A13Rik | RIKEN cDNA 4932438A13 gene                                                           | 2.356 | 0.0006566 |
| 1459293_at   | NA            | NA                                                                                   | 2.358 | 0.0046928 |
| 1419674_a_at | Dpep1         | dipeptidase 1 (renal)                                                                | 2.359 | 0.019756  |
| 1436902_x_at | Tmsb10        | thymosin, beta 10                                                                    | 2.360 | 0.0008871 |
| 1449875_s_at | H2-T10        | histocompatibility 2, T region locus 10                                              | 2.361 | 0.0006829 |

|              |               |                                                                                    |       |           |
|--------------|---------------|------------------------------------------------------------------------------------|-------|-----------|
| 1431230_a_at | Btbd9         | BTB (POZ) domain containing 9                                                      | 2.361 | 0.0040792 |
| 1451775_s_at | Il13ra1       | interleukin 13 receptor, alpha 1                                                   | 2.363 | 0.0035932 |
| 1436909_at   | Slc25a44      | solute carrier family 25, member 44                                                | 2.363 | 0.0074631 |
| 1416449_x_at | Stxbp2        | syntaxin binding protein 2                                                         | 2.366 | 0.0005825 |
| 1452304_a_at | Arhgef5       | Rho guanine nucleotide exchange factor (GEF) 5                                     | 2.374 | 0.0008211 |
| 1424238_at   | Sirt7         | sirtuin 7 (silent mating type information regulation 2, homolog) 7 (S. cerevisiae) | 2.375 | 0.0007643 |
| 1438999_a_at | Nfat5         | nuclear factor of activated T-cells 5                                              | 2.375 | 0.0005221 |
| 1428829_at   | 6820401H01Rik | RIKEN cDNA 6820401H01 gene                                                         | 2.377 | 0.0006356 |
| 1446558_at   | F730015K02Rik | RIKEN cDNA F730015K02 gene                                                         | 2.377 | 0.0494931 |
| 1425668_a_at | St3gal4       | ST3 beta-galactoside alpha-2,3-sialyltransferase 4                                 | 2.378 | 0.0056368 |
| 1424208_at   | Ptger4        | prostaglandin E receptor 4 (subtype EP4)                                           | 2.378 | 0.0012614 |
| 1435601_at   | Phlpp1        | PH domain and leucine rich repeat protein phosphatase-like                         | 2.381 | 0.0039509 |
| 1459689_at   | NA            | NA                                                                                 | 2.382 | 0.0042031 |
| 1441467_at   | NA            | NA                                                                                 | 2.382 | 0.0125524 |

|              |         |                                                             |       |           |
|--------------|---------|-------------------------------------------------------------|-------|-----------|
| 1420913_at   | Slco2a1 | solute carrier organic anion transporter family, member 2a1 | 2.382 | 0.0004568 |
| 1420174_s_at | Tax1bp1 | Tax1 (human T-cell leukemia virus type I) binding protein 1 | 2.383 | 0.0009379 |
| 1437226_x_at | Marcks1 | MARCKS-like 1                                               | 2.385 | 0.0007364 |
| 1432007_s_at | Ap2a2   | adaptor protein complex AP-2, alpha 2 subunit               | 2.386 | 0.0130116 |
| 1431507_a_at | Synj2bp | synaptojanin 2 binding protein                              | 2.387 | 0.0008464 |
| 1426624_a_at | Ypel3   | yippee-like 3 (Drosophila)                                  | 2.388 | 0.0027241 |
| 1431744_a_at | Smap1   | stromal membrane-associated protein 1                       | 2.390 | 0.0082918 |
| 1444849_at   | C76872  | expressed sequence C76872                                   | 2.391 | 0.0202892 |
| 1440076_at   | NA      | NA                                                          | 2.393 | 0.0029986 |
| 1416353_at   | Nr1h2   | nuclear receptor subfamily 1, group H, member 2             | 2.393 | 0.0044595 |
| 1460239_at   | Tspan13 | tetraspanin 13                                              | 2.394 | 0.0059794 |
| 1455980_a_at | Gas2l3  | growth arrest-specific 2 like 3                             | 2.394 | 0.0014168 |
| 1424741_s_at | Creb3   | cAMP responsive element binding protein 3                   | 2.396 | 0.0039301 |
| 1453796_a_at | Ergic2  | ERGIC and golgi 2                                           | 2.397 | 0.0029902 |
| 1451299_at   | Prkx    | protein kinase, X-linked                                    | 2.399 | 0.0039114 |

|              |          |                                                                             |       |           |
|--------------|----------|-----------------------------------------------------------------------------|-------|-----------|
| 1431133_at   | Arhgap18 | Rho GTPase activating protein 18                                            | 2.400 | 0.0015327 |
| 1457374_at   | Nedd4l   | neural precursor cell expressed, developmentally down-regulated gene 4-like | 2.400 | 0.0039457 |
| 1458518_at   | Cpeb2    | cytoplasmic polyadenylation element binding protein 2                       | 2.401 | 0.0004794 |
| 1434489_at   | Elmo3    | engulfment and cell motility 3, ced-12 homolog (C. elegans)                 | 2.401 | 0.0014657 |
| 1443673_x_at | NA       | NA                                                                          | 2.402 | 0.0087254 |
| 1416656_at   | Clic1    | chloride intracellular channel 1                                            | 2.403 | 0.0020158 |
| 1427357_at   | Cda      | cytidine deaminase                                                          | 2.406 | 0.0101222 |
| 1419167_at   | Prap1    | proline-rich acidic protein 1                                               | 2.409 | 0.0030138 |
| 1419582_at   | Cyp2c55  | cytochrome P450, family 2, subfamily c, polypeptide 55                      | 2.410 | 0.0223481 |
| 1421268_at   | Ugcg     | UDP-glucose ceramide glucosyltransferase                                    | 2.412 | 0.0005164 |
| 1425336_x_at | H2-K1    | histocompatibility 2, K1, K region                                          | 2.414 | 0.0018702 |
| 1451821_a_at | Sp100    | nuclear antigen Sp100                                                       | 2.416 | 0.0019518 |
| 1440893_at   | Riok1    | RIO kinase 1 (yeast)                                                        | 2.416 | 0.0040006 |
| 1433748_at   | Zdhhc18  | zinc finger, DHHC domain containing 18                                      | 2.416 | 0.0025647 |

|              |         |                                                                 |       |           |
|--------------|---------|-----------------------------------------------------------------|-------|-----------|
| 1426632_at   | Kctd14  | potassium channel tetramerisation domain containing 14          | 2.417 | 0.0015521 |
| 1420745_a_at | Ccndbp1 | cyclin D-type binding-protein 1                                 | 2.421 | 0.0025984 |
| 1434303_at   | Raph1   | Ras association (RalGDS/AF-6) and pleckstrin homology domains 1 | 2.424 | 0.0031452 |
| 1438279_at   | Dpp4    | dipeptidylpeptidase 4                                           | 2.425 | 0.0023701 |
| 1427032_at   | Herc4   | hect domain and RLD 4                                           | 2.425 | 0.0006585 |
| 1436623_at   | Entpd7  | ectonucleoside triphosphate diphosphohydrolase 7                | 2.426 | 0.0164433 |
| 1424378_at   | Ldlrap1 | low density lipoprotein receptor adaptor protein 1              | 2.429 | 0.0052571 |
| 1435353_a_at | Sfi1    | Sfi1 homolog, spindle assembly associated (yeast)               | 2.430 | 0.000361  |
| 1450973_s_at | Mapkbp1 | mitogen-activated protein kinase binding protein 1              | 2.432 | 0.0035979 |
| 1451201_s_at | Rnh1    | ribonuclease/angiogenin inhibitor 1                             | 2.433 | 0.0012762 |
| 1419758_at   | Abcb1a  | ATP-binding cassette, sub-family B (MDR/TAP), member 1A         | 2.434 | 0.0018793 |
| 1426603_at   | Rnasel  | ribonuclease L (2'5'-oligoadenylate synthetase-dependent)       | 2.435 | 0.0123403 |



|              |                   |                                                                            |       |           |
|--------------|-------------------|----------------------------------------------------------------------------|-------|-----------|
| 1448538_at   | D4Wsu53e          | DNA segment,<br>Chr 4, Wayne<br>State University<br>53, expressed          | 2.436 | 0.0015907 |
| 1417335_at   | Sult2b1           | sulfotransferase<br>family, cytosolic,<br>2B, member 1                     | 2.439 | 0.000484  |
| 1434082_at   | Pctk2             | PCTAIRE-motif<br>protein kinase 2                                          | 2.439 | 0.0006227 |
| 1417590_at   | Cyp27a1           | cytochrome<br>P450, family 27,<br>subfamily a,<br>polypeptide 1            | 2.440 | 0.0042723 |
| 1450484_a_at | Cmpk2             | cytidine<br>monophosphate<br>(UMP-CMP)<br>kinase 2,<br>mitochondrial       | 2.440 | 0.0013776 |
| 1456495_s_at | Osbpl6            | oxysterol binding<br>protein-like 6                                        | 2.441 | 0.0015932 |
| 1441604_at   | Esd               | esterase<br>D/formylglutathio<br>ne hydrolase                              | 2.444 | 0.0004296 |
| 1439998_at   | Jmjd1c            | jumonji domain<br>containing 1C                                            | 2.444 | 0.0009605 |
| 1457825_x_at | Tcn2              | transcobalamin 2                                                           | 2.445 | 0.0046816 |
| 1435697_a_at | Cytip             | cytohesin 1<br>interacting protein                                         | 2.446 | 0.0004366 |
| 1437129_at   | E330018D03<br>Rik | RIKEN cDNA<br>E330018D03<br>gene                                           | 2.446 | 0.0065176 |
| 1460643_at   | E1l               | elongation factor<br>RNA polymerase<br>II                                  | 2.447 | 0.0047814 |
| 1426879_at   | 1190005F20R<br>ik | RIKEN cDNA<br>1190005F20<br>gene                                           | 2.447 | 0.0008869 |
| 1437259_at   | Slc9a2            | solute carrier<br>family 9<br>(sodium/hydroge<br>n exchanger),<br>member 2 | 2.447 | 0.0143117 |

|              |               |                                                                                        |       |           |
|--------------|---------------|----------------------------------------------------------------------------------------|-------|-----------|
| 1416794_at   | Arl6ip2       | ADP-ribosylation factor-like 6 interacting protein 2                                   | 2.449 | 0.0005974 |
| 1428373_at   | lhpk2         | inositol hexaphosphate kinase 2                                                        | 2.452 | 0.0017523 |
| 1448415_a_at | Sema3b        | sema domain, immunoglobulin domain (Ig), short basic domain, secreted, (semaphorin) 3B | 2.453 | 0.0037012 |
| 1428323_at   | Gpd2          | glycerol phosphate dehydrogenase 2, mitochondrial                                      | 2.453 | 0.0071966 |
| 1445862_at   | 4921513D23Rik | RIKEN cDNA 4921513D23 gene                                                             | 2.458 | 0.0003433 |
| 1421489_a_at | 2010106E10Rik | RIKEN cDNA 2010106E10 gene                                                             | 2.458 | 0.0010965 |
| 1418073_at   | Acot9         | acyl-CoA thioesterase 9                                                                | 2.459 | 0.0004868 |
| 1451422_at   | Myo18a        | myosin XVIIIa                                                                          | 2.460 | 0.002903  |
| 1422704_at   | Gyk           | glycerol kinase                                                                        | 2.462 | 0.0004558 |
| 1454708_at   | Ablim1        | actin-binding LIM protein 1                                                            | 2.463 | 0.0003148 |
| 1458849_at   | Asah2         | N-acylsphingosine amidohydrolase 2                                                     | 2.467 | 0.0221308 |
| 1438581_at   | Specc1l       | SPECC1-like                                                                            | 2.467 | 0.0006057 |
| 1415974_at   | Map2k2        | mitogen-activated protein kinase kinase 2                                              | 2.467 | 0.0005041 |
| 1451253_at   | Pxk           | PX domain containing serine/threonine kinase                                           | 2.467 | 0.000505  |

|              |            |                                                              |       |           |
|--------------|------------|--------------------------------------------------------------|-------|-----------|
| 1450622_at   | Bcar1      | breast cancer anti estrogen resistance 1                     | 2.468 | 0.0006001 |
| 1424441_at   | Slc27a4    | solute carrier family 27 (fatty acid transporter), member 4  | 2.470 | 0.0003158 |
| 1452956_a_at | D12Ert647e | DNA segment, Chr 12, ERATO Doi 647, expressed                | 2.472 | 0.0005282 |
| 1421957_a_at | Pcyt1a     | phosphate cytidyltransferase 1, choline, alpha isoform       | 2.472 | 0.0013127 |
| 1424794_at   | Rnf186     | ring finger protein 186                                      | 2.474 | 0.0015567 |
| 1443983_at   | NA         | NA                                                           | 2.475 | 0.0131311 |
| 1418183_a_at | Cyth1      | cytohesin 1                                                  | 2.475 | 0.0003863 |
| 1457619_at   | BC015286   | cDNA sequence BC015286                                       | 2.476 | 0.0011216 |
| 1454915_at   | Rab3gap2   | RAB3 GTPase activating protein subunit 2                     | 2.479 | 0.0003943 |
| 1443137_at   | NA         | NA                                                           | 2.479 | 0.0320746 |
| 1440814_x_at | Hs3st2     | heparan sulfate (glucosamine) 3-O-sulfotransferase 2         | 2.479 | 0.0078366 |
| 1437513_a_at | Serinc1    | serine incorporator 1                                        | 2.480 | 0.0006257 |
| 1448402_at   | Tln1       | talin 1                                                      | 2.483 | 0.0019495 |
| 1451899_a_at | Gtf2ird1   | general transcription factor II I repeat domain-containing 1 | 2.483 | 0.0037342 |

|              |                   |                                                                       |       |           |
|--------------|-------------------|-----------------------------------------------------------------------|-------|-----------|
| 1435797_at   | D5Wsu178e         | DNA segment,<br>Chr 5, Wayne<br>State University<br>178, expressed    | 2.485 | 0.0006072 |
| 1446330_at   | NA                | NA                                                                    | 2.486 | 0.0144859 |
| 1437735_at   | Ppp1r12a          | protein<br>phosphatase 1,<br>regulatory<br>(inhibitor) subunit<br>12A | 2.487 | 0.0003291 |
| 1416044_at   | Flii              | flightless I<br>homolog<br>(Drosophila)                               | 2.488 | 0.0009469 |
| 1417651_at   | Cyp2c29           | cytochrome<br>P450, family 2,<br>subfamily c,<br>polypeptide 29       | 2.489 | 0.002618  |
| 1450997_at   | Stk17b            | serine/threonine<br>kinase 17b<br>(apoptosis-<br>inducing)            | 2.490 | 0.0005118 |
| 1417980_a_at | Insig2            | insulin induced<br>gene 2                                             | 2.491 | 0.0012472 |
| 1447141_at   | AW107722          | expressed<br>sequence<br>AW107722                                     | 2.492 | 0.0008462 |
| 1423308_at   | Tgoln1            | trans-golgi<br>network protein                                        | 2.492 | 0.012743  |
| 1426587_a_at | Stat3             | signal transducer<br>and activator of<br>transcription 3              | 2.493 | 0.0005725 |
| 1418627_at   | Gclm              | glutamate-<br>cysteine ligase ,<br>modifier subunit                   | 2.494 | 0.0002411 |
| 1456806_at   | A130010C12<br>Rik | RIKEN cDNA<br>A130010C12<br>gene                                      | 2.494 | 0.0019149 |
| 1417040_a_at | Bok               | BCL2-related<br>ovarian killer<br>protein                             | 2.495 | 0.0003525 |

|              |          |                                                                       |       |           |
|--------------|----------|-----------------------------------------------------------------------|-------|-----------|
| 1427040_at   | Mdfic    | MyoD family inhibitor domain containing                               | 2.496 | 0.0015901 |
| 1426502_s_at | Gpt      | glutamic pyruvic transaminase, soluble                                | 2.501 | 0.0031803 |
| 1422302_s_at | Ftl2     | ferritin light chain 2                                                | 2.501 | 0.001453  |
| 1444421_at   | Etohd2   | ethanol decreased 2                                                   | 2.502 | 0.009108  |
| 1422638_s_at | Rassf5   | Ras association (RalGDS/AF-6) domain family member 5                  | 2.503 | 0.0013765 |
| 1436329_at   | Egr3     | early growth response 3                                               | 2.503 | 0.0019462 |
| 1428691_at   | Chd2     | chromodomain helicase DNA binding protein 2                           | 2.504 | 0.0003306 |
| 1418835_at   | Phlda1   | pleckstrin homology-like domain, family A, member 1                   | 2.507 | 0.0050764 |
| 1421011_at   | Hsd17b11 | hydroxysteroid (17-beta) dehydrogenase 11                             | 2.509 | 0.0005406 |
| 1441986_at   | Zcchc6   | zinc finger, CCHC domain containing 6                                 | 2.513 | 0.0029542 |
| 1429796_at   | Kalrn    | kalirin, RhoGEF kinase                                                | 2.514 | 0.00072   |
| 1426601_at   | Slc37a1  | solute carrier family 37 (glycerol-3-phosphate transporter), member 1 | 2.516 | 0.0012629 |
| 1434917_at   | Cobl     | cordons-bleu                                                          | 2.516 | 0.0034156 |
| 1425079_at   | Tm6sf2   | transmembrane 6 superfamily member 2                                  | 2.522 | 0.0191764 |

|              |          |                                                               |       |           |
|--------------|----------|---------------------------------------------------------------|-------|-----------|
| 1422185_a_at | Cyb5r3   | cytochrome b5 reductase 3                                     | 2.523 | 0.0017729 |
| 1419343_at   | Slc15a1  | solute carrier family 15 (oligopeptide transporter), member 1 | 2.527 | 0.0027931 |
| 1415812_at   | Gsn      | gelsolin                                                      | 2.528 | 0.0003555 |
| 1421411_at   | Pstpip2  | proline-serine-threonine phosphatase-interacting protein 2    | 2.528 | 0.0012533 |
| 1428300_at   | Specc1l  | SPECC1-like                                                   | 2.529 | 0.0005364 |
| 1451911_a_at | Ace      | angiotensin I converting enzyme (peptidyl-dipeptidase A) 1    | 2.530 | 0.0043439 |
| 1428736_at   | Gramd3   | GRAM domain containing 3                                      | 2.531 | 0.0006749 |
| 1453163_at   | Ppp1r12a | protein phosphatase 1, regulatory (inhibitor) subunit 12A     | 2.531 | 0.0002824 |
| 1439479_at   | Lct      | lactase                                                       | 2.533 | 0.0034472 |
| 1449071_at   | Myl7     | myosin, light polypeptide 7, regulatory                       | 2.534 | 0.0014414 |
| 1418984_at   | Inadl    | InaD-like (Drosophila)                                        | 2.534 | 0.0002975 |
| 1424294_at   | Ppp4r1   | protein phosphatase 4, regulatory subunit 1                   | 2.535 | 0.0005355 |
| 1450034_at   | Stat1    | signal transducer and activator of transcription 1            | 2.537 | 0.0007909 |

|              |           |                                                                                                     |       |           |
|--------------|-----------|-----------------------------------------------------------------------------------------------------|-------|-----------|
| 1426491_at   | Herc2     | hect (homologous to the E6-AP (UBE3A) carboxyl terminus) domain and RCC1 (CHC1)-like domain (RLD) 2 | 2.538 | 0.0006829 |
| 1429123_at   | Rab27a    | RAB27A, member RAS oncogene family                                                                  | 2.538 | 0.0018845 |
| 1417953_at   | D6Wsu176e | DNA segment, Chr 6, Wayne State University 176, expressed                                           | 2.540 | 0.0008384 |
| 1427164_at   | Il13ra1   | interleukin 13 receptor, alpha 1                                                                    | 2.540 | 0.0004671 |
| 1425822_a_at | Dtx1      | deltex 1 homolog (Drosophila)                                                                       | 2.543 | 0.0014275 |
| 1435665_at   | AI451617  | expressed sequence AI451617                                                                         | 2.543 | 0.0013282 |
| 1433805_at   | Jak1      | Janus kinase 1                                                                                      | 2.545 | 0.0007126 |
| 1423452_at   | Stk17b    | serine/threonine kinase 17b (apoptosis-inducing)                                                    | 2.546 | 0.0005069 |
| 1419446_at   | Tbc1d1    | TBC1 domain family, member 1                                                                        | 2.548 | 0.0165106 |
| 1427294_a_at | Slc38a10  | solute carrier family 38, member 10                                                                 | 2.555 | 0.0136516 |
| 1456262_at   | Rbm5      | RNA binding motif protein 5                                                                         | 2.555 | 0.0004372 |
| 1426633_s_at | Kctd14    | potassium channel tetramerisation domain containing 14                                              | 2.556 | 0.0003247 |
| 1425456_a_at | Map2k3    | mitogen-activated protein kinase kinase 3                                                           | 2.557 | 0.0047848 |

|              |                   |                                                                                                    |       |           |
|--------------|-------------------|----------------------------------------------------------------------------------------------------|-------|-----------|
| 1428359_s_at | 1810010M01<br>Rik | RIKEN cDNA<br>1810010M01<br>gene                                                                   | 2.557 | 0.0023089 |
| 1439079_a_at | Erb2ip            | Erb2 interacting<br>protein                                                                        | 2.557 | 0.0012113 |
| 1417141_at   | Igtp              | interferon gamma<br>induced GTPase                                                                 | 2.559 | 0.0024735 |
| 1460694_s_at | Svil              | supervillin                                                                                        | 2.559 | 0.0002685 |
| 1451407_at   | Igsf5             | immunoglobulin<br>superfamily,<br>member 5                                                         | 2.559 | 0.0022987 |
| 1429392_at   | Wdr40a            | WD repeat<br>domain 40A                                                                            | 2.561 | 0.0065364 |
| 1419238_at   | Abca7             | ATP-binding<br>cassette, sub-<br>family A (ABC1),<br>member 7                                      | 2.567 | 0.000532  |
| 1448207_at   | Lasp1             | LIM and SH3<br>protein 1                                                                           | 2.570 | 0.0162203 |
| 1452716_at   | 5730469M10<br>Rik | RIKEN cDNA<br>5730469M10<br>gene                                                                   | 2.572 | 0.0089572 |
| 1427630_x_at | Ceacam1           | carcinoembryonic<br>antigen-related<br>cell adhesion<br>molecule 1                                 | 2.577 | 0.0257038 |
| 1452217_at   | Ahnak             | AHNAK<br>nucleoprotein<br>(desmoyokin)                                                             | 2.580 | 0.000499  |
| 1429608_at   | Adh6a             | alcohol<br>dehydrogenase<br>6A (class V)                                                           | 2.580 | 0.0006041 |
| 1415949_at   | Cpe               | carboxypeptidase<br>E                                                                              | 2.580 | 0.0024898 |
| 1457404_at   | Nfkbiz            | nuclear factor of<br>kappa light<br>polypeptide gene<br>enhancer in B-<br>cells inhibitor,<br>zeta | 2.584 | 0.0018612 |
| 1425136_x_at | Dnm2              | dynamamin 2                                                                                        | 2.584 | 0.0037902 |



|              |               |                                                             |       |           |
|--------------|---------------|-------------------------------------------------------------|-------|-----------|
| 1438503_x_at | Edf1          | endothelial differentiation-related factor 1                | 2.585 | 0.0005259 |
| 1446939_at   | NA            | NA                                                          | 2.591 | 0.0075099 |
| 1448510_at   | Efna1         | ephrin A1                                                   | 2.591 | 0.0010735 |
| 1426397_at   | Tgfbr2        | transforming growth factor, beta receptor II                | 2.591 | 0.0001969 |
| 1450642_at   | 3110001I20Rik | RIKEN cDNA 3110001I20 gene                                  | 2.593 | 0.000507  |
| 1452622_a_at | Tradd         | TNFRSF1A-associated via death domain                        | 2.593 | 0.0002044 |
| 1425118_at   | Spire2        | spire homolog 2 (Drosophila)                                | 2.595 | 0.0014284 |
| 1452267_at   | Flywch1       | FLYWCH-type zinc finger 1                                   | 2.597 | 0.0016135 |
| 1426923_at   | Hrb           | HIV-1 Rev binding protein                                   | 2.600 | 0.0002343 |
| 1426928_at   | Ccdc93        | coiled-coil domain containing 93                            | 2.601 | 0.0003799 |
| 1424973_at   | Cyp3a25       | cytochrome P450, family 3, subfamily a, polypeptide 25      | 2.601 | 0.0178488 |
| 1418947_at   | Nek3          | NIMA (never in mitosis gene a)-related expressed kinase 3   | 2.606 | 0.0003718 |
| 1444479_at   | NA            | NA                                                          | 2.606 | 0.00045   |
| 1449107_at   | Nudt4         | nudix (nucleoside diphosphate linked moiety X)-type motif 4 | 2.609 | 0.0002223 |
| 1426595_at   | Slc18a1       | solute carrier family 18 (vesicular monoamine), member 1    | 2.610 | 0.0091975 |

|              |                   |                                                                                                                                       |       |           |
|--------------|-------------------|---------------------------------------------------------------------------------------------------------------------------------------|-------|-----------|
| 1435366_at   | D430042O09<br>Rik | RIKEN cDNA<br>D430042O09<br>gene                                                                                                      | 2.612 | 0.0002731 |
| 1422721_at   | Tnk1              | tyrosine kinase,<br>non-receptor, 1                                                                                                   | 2.612 | 0.0003505 |
| 1448110_at   | Sema4a            | sema domain,<br>immunoglobulin<br>domain (Ig),<br>transmembrane<br>domain (TM) and<br>short cytoplasmic<br>domain,<br>(semaphorin) 4A | 2.613 | 0.0016472 |
| 1450376_at   | Mxi1              | Max interacting<br>protein 1                                                                                                          | 2.613 | 0.0008963 |
| 1417394_at   | Klf4              | Kruppel-like<br>factor 4 (gut)                                                                                                        | 2.614 | 0.0002056 |
| 1453286_at   | Plxna2            | plexin A2                                                                                                                             | 2.614 | 0.0006238 |
| 1451383_a_at | Chuk              | conserved helix-<br>loop-helix<br>ubiquitous kinase                                                                                   | 2.615 | 0.0008589 |
| 1438716_at   | AI451617          | expressed<br>sequence<br>AI451617                                                                                                     | 2.616 | 0.0023635 |
| 1434380_at   | Gbp6              | guanylate binding<br>protein 6                                                                                                        | 2.617 | 0.0018733 |
| 1428330_at   | Dopey2            | dopey family<br>member 2                                                                                                              | 2.617 | 0.0001716 |
| 1452228_at   | Tbc1d23           | TBC1 domain<br>family, member<br>23                                                                                                   | 2.618 | 0.0027038 |
| 1425895_a_at | Id1               | inhibitor of DNA<br>binding 1                                                                                                         | 2.618 | 0.0002377 |
| 1431008_at   | 0610037M15<br>Rik | RIKEN cDNA<br>0610037M15<br>gene                                                                                                      | 2.622 | 0.0026787 |
| 1422650_a_at | Riok3             | RIO kinase 3<br>(yeast)                                                                                                               | 2.623 | 0.0002128 |

|              |               |                                                                               |       |           |
|--------------|---------------|-------------------------------------------------------------------------------|-------|-----------|
| 1455399_at   | Cnksr1        | connector enhancer of kinase suppressor of Ras 1                              | 2.624 | 0.000427  |
| 1422943_a_at | Hspb1         | heat shock protein 1                                                          | 2.625 | 0.0003348 |
| 1437244_at   | Gas2l3        | growth arrest-specific 2 like 3                                               | 2.630 | 0.0004834 |
| 1429487_at   | Ppp1r12a      | protein phosphatase 1, regulatory (inhibitor) subunit 12A                     | 2.631 | 0.0071643 |
| 1428066_at   | Ccdc120       | coiled-coil domain containing 120                                             | 2.632 | 0.000503  |
| 1425576_at   | Ahcyl1        | S-adenosylhomocysteine hydrolase-like 1                                       | 2.632 | 0.0003599 |
| 1441058_at   | Itpkb         | inositol 1,4,5-trisphosphate 3-kinase B                                       | 2.634 | 0.0044836 |
| 1440055_at   | NA            | NA                                                                            | 2.635 | 0.0005794 |
| 1425227_a_at | Atp6v0a1      | ATPase, H+ transporting, lysosomal V0 subunit A1                              | 2.638 | 0.0011175 |
| 1452445_at   | Slc41a2       | solute carrier family 41, member 2                                            | 2.639 | 0.0010716 |
| 1425073_at   | Plekhg6       | pleckstrin homology domain containing, family G (with RhoGef domain) member 6 | 2.645 | 0.0003561 |
| 1428574_a_at | Chn2          | chimerin (chimaerin) 2                                                        | 2.645 | 0.0004414 |
| 1423393_at   | Clic4         | chloride intracellular channel 4 (mitochondrial)                              | 2.647 | 0.0010835 |
| 1457593_at   | 2610202C22Rik | RIKEN cDNA 2610202C22 gene                                                    | 2.648 | 0.0023399 |

|              |               |                                                        |       |           |
|--------------|---------------|--------------------------------------------------------|-------|-----------|
| 1421043_s_at | Arhgef2       | rho/rac guanine nucleotide exchange factor (GEF) 2     | 2.649 | 0.0015562 |
| 1440020_at   | NA            | NA                                                     | 2.649 | 0.001545  |
| 1445746_at   | NA            | NA                                                     | 2.650 | 0.0023677 |
| 1425645_s_at | Cyp2b10       | cytochrome P450, family 2, subfamily b, polypeptide 10 | 2.654 | 0.0129829 |
| 1451275_at   | Uhrf1bp1l     | UHRF1 (ICBP90) binding protein 1-like                  | 2.655 | 0.0001997 |
| 1426922_s_at | Hrb           | HIV-1 Rev binding protein                              | 2.655 | 0.0002963 |
| 1437813_at   | Aim1l         | absent in melanoma 1-like                              | 2.658 | 0.0009804 |
| 1421987_at   | Papss2        | 3-phosphoadenosine 5-phosphosulfate synthase 2         | 2.658 | 0.0043555 |
| 1424857_a_at | Trim34        | tripartite motif-containing 34                         | 2.658 | 0.0001878 |
| 1422619_at   | Ppap2a        | phosphatidic acid phosphatase 2a                       | 2.660 | 0.0135285 |
| 1449228_at   | Sh3gl2        | SH3-domain GRB2-like 2                                 | 2.662 | 0.001399  |
| 1422917_at   | Epha1         | Eph receptor A1                                        | 2.663 | 0.0114558 |
| 1424552_at   | Casp8         | caspase 8                                              | 2.663 | 0.0001733 |
| 1431701_a_at | Pdzk1         | PDZ domain containing 1                                | 2.664 | 0.0008376 |
| 1458980_at   | NA            | NA                                                     | 2.668 | 0.0052436 |
| 1458210_at   | 9130404H23Rik | RIKEN cDNA 9130404H23 gene                             | 2.669 | 0.0001894 |
| 1418841_s_at | Cdc21l        | cell division cycle 2-like 1                           | 2.669 | 0.0004175 |

|              |          |                                                                 |       |           |
|--------------|----------|-----------------------------------------------------------------|-------|-----------|
| 1460351_at   | S100a11  | S100 calcium binding protein A11 (calgizzarin)                  | 2.670 | 0.0016039 |
| 1428223_at   | Mfsd2    | major facilitator superfamily domain containing 2               | 2.672 | 0.0018782 |
| 1445147_at   | Psme4    | proteasome (prosome, macropain) activator subunit 4             | 2.677 | 0.004426  |
| 1435454_a_at | BC006779 | cDNA sequence BC006779                                          | 2.677 | 0.0002159 |
| 1425634_a_at | Tnk1     | tyrosine kinase, non-receptor, 1                                | 2.680 | 0.001363  |
| 1426604_at   | Rnasel   | ribonuclease L (2'5'-oligoadenylate synthetase-dependent)       | 2.680 | 0.0002453 |
| 1422823_at   | Eps8     | epidermal growth factor receptor pathway substrate 8            | 2.684 | 0.0001678 |
| 1458619_at   | NA       | NA                                                              | 2.684 | 0.0010217 |
| 1416381_a_at | Prdx5    | peroxiredoxin 5                                                 | 2.685 | 0.0005944 |
| 1418826_at   | Ms4a6b   | membrane-spanning 4-domains, subfamily A, member 6B             | 2.688 | 0.0070232 |
| 1439349_at   | Sbno2    | strawberry notch homolog 2 (Drosophila)                         | 2.689 | 0.0009765 |
| 1456212_x_at | Socs3    | suppressor of cytokine signaling 3                              | 2.693 | 0.0009528 |
| 1417877_at   | Eepd1    | endonuclease/exonuclease/phosphatase family domain containing 1 | 2.696 | 0.0003002 |

|              |         |                                                        |       |           |
|--------------|---------|--------------------------------------------------------|-------|-----------|
| 1428509_at   | Myo1e   | myosin IE                                              | 2.702 | 0.0003413 |
| 1423049_a_at | Tpm1    | tropomyosin 1, alpha                                   | 2.703 | 0.0019223 |
| 1421872_at   | Rab24   | RAB24, member RAS oncogene family                      | 2.704 | 0.0006642 |
| 1445391_at   | Diap1   | diaphanous homolog 1 (Drosophila)                      | 2.705 | 0.0002807 |
| 1436502_at   | Mtus1   | mitochondrial tumor suppressor 1                       | 2.706 | 0.0016328 |
| 1426023_a_at | Rabep1  | rabaptin, RAB GTPase binding effector protein 1        | 2.708 | 0.0059652 |
| 1422735_at   | Foxq1   | forkhead box Q1                                        | 2.711 | 0.0034563 |
| 1448548_at   | Tulp4   | tubby like protein 4                                   | 2.711 | 0.0002404 |
| 1428471_at   | Sorbs1  | sorbin and SH3 domain containing 1                     | 2.712 | 0.000141  |
| 1424502_at   | Oit1    | oncoprotein induced transcript 1                       | 2.715 | 0.0016922 |
| 1449925_at   | Cxcr3   | chemokine (C-X-C motif) receptor 3                     | 2.715 | 0.0086793 |
| 1418097_a_at | Crif2   | cytokine receptor-like factor 2                        | 2.718 | 0.0169792 |
| 1418562_at   | Sf3b1   | splicing factor 3b, subunit 1                          | 2.722 | 0.0009981 |
| 1437643_at   | Cenpj   | centromere protein J                                   | 2.729 | 0.0004856 |
| 1456836_at   | Itk     | IL2-inducible T-cell kinase                            | 2.730 | 0.0020559 |
| 1446130_at   | NA      | NA                                                     | 2.733 | 0.0056995 |
| 1435979_a_at | Myo15b  | myosin XVB                                             | 2.733 | 0.0002398 |
| 1418767_at   | Cyp4f13 | cytochrome P450, family 4, subfamily f, polypeptide 13 | 2.736 | 0.000785  |
| 1418884_x_at | Tuba1a  | tubulin, alpha 1A                                      | 2.737 | 0.00034   |

|              |                |                                                                                          |       |           |
|--------------|----------------|------------------------------------------------------------------------------------------|-------|-----------|
| 1422962_a_at | Psmb8          | proteasome (prosome, macropain) subunit, beta type 8 (large multifunctional peptidase 7) | 2.737 | 0.0010661 |
| 1436737_a_at | Sorbs1         | sorbin and SH3 domain containing 1                                                       | 2.738 | 0.0003838 |
| 1435939_s_at | Hepacam2       | HEPACAM family member 2                                                                  | 2.744 | 0.0004587 |
| 1460378_a_at | Tes            | testis derived transcript                                                                | 2.744 | 0.000469  |
| 1434026_at   | Atp8b2         | ATPase, class I, type 8B, member 2                                                       | 2.744 | 0.0041265 |
| 1429639_at   | Prei4          | preimplantation protein 4                                                                | 2.752 | 0.0105688 |
| 1421604_a_at | Klf3           | Kruppel-like factor 3 (basic)                                                            | 2.753 | 0.0009963 |
| 1429272_a_at | Apol7a         | apolipoprotein L 7a                                                                      | 2.755 | 0.000348  |
| 1427473_at   | Gstm3          | glutathione S-transferase, mu 3                                                          | 2.760 | 0.0138656 |
| 1416683_at   | Plxnb2         | plexin B2                                                                                | 2.762 | 0.0001443 |
| 1458415_at   | Clec2e         | C-type lectin domain family 2, member e                                                  | 2.767 | 0.0001807 |
| 1436168_at   | C730029A08 Rik | RIKEN cDNA C730029A08 gene                                                               | 2.768 | 0.0013947 |
| 1419128_at   | Itgax          | integrin alpha X                                                                         | 2.769 | 0.0042742 |
| 1418148_at   | Abhd1          | abhydrolase domain containing 1                                                          | 2.772 | 0.0012132 |
| 1423086_at   | Npc1           | Niemann Pick type C1                                                                     | 2.780 | 0.0009874 |
| 1448655_at   | Lrp1           | low density lipoprotein receptor-related protein 1                                       | 2.780 | 0.000986  |
| 1450872_s_at | Lipa           | lysosomal acid lipase A                                                                  | 2.788 | 0.0063229 |
| 1419479_at   | Sectm1b        | secreted and transmembrane 1B                                                            | 2.798 | 0.0003774 |

|              |               |                                                                                |       |           |
|--------------|---------------|--------------------------------------------------------------------------------|-------|-----------|
| 1427186_a_at | Mef2a         | myocyte enhancer factor 2A                                                     | 2.800 | 0.0004336 |
| 1433514_at   | Etnk1         | ethanolamine kinase 1                                                          | 2.800 | 0.0002811 |
| 1438558_x_at | Foxq1         | forkhead box Q1                                                                | 2.803 | 0.0003205 |
| 1416689_at   | Tuft1         | tuftelin 1                                                                     | 2.806 | 0.0003856 |
| 1424354_at   | Tmem140       | transmembrane protein 140                                                      | 2.809 | 0.0006992 |
| 1448783_at   | Slc7a9        | solute carrier family 7 (cationic amino acid transporter, y+ system), member 9 | 2.811 | 0.0006706 |
| 1451564_at   | Parp14        | poly (ADP-ribose) polymerase family, member 14                                 | 2.812 | 0.0001193 |
| 1450099_a_at | Gba           | glucosidase, beta, acid                                                        | 2.818 | 0.0021538 |
| 1452934_at   | Tmc5          | transmembrane channel-like gene family 5                                       | 2.823 | 0.0019612 |
| 1460203_at   | Itpr1         | inositol 1,4,5-triphosphate receptor 1                                         | 2.825 | 0.0029982 |
| 1428479_at   | Nfatc1        | nuclear factor of activated T-cells, cytoplasmic, calcineurin-dependent 1      | 2.825 | 0.0020834 |
| 1452214_at   | Skil          | SKI-like                                                                       | 2.827 | 0.0003103 |
| 1451931_x_at | H2-L          | histocompatibility 2, D region                                                 | 2.831 | 0.0009549 |
| 1436054_at   | 9130227C08Rik | RIKEN cDNA 9130227C08Rik gene                                                  | 2.835 | 0.0001629 |
| 1416712_at   | Pepd          | peptidase D                                                                    | 2.840 | 0.0023143 |
| 1418444_a_at | Gde1          | glycerophosphodiester phosphodiesterase 1                                      | 2.842 | 0.0037236 |



|              |                   |                                                           |       |           |
|--------------|-------------------|-----------------------------------------------------------|-------|-----------|
| 1419279_at   | Pip4k2a           | phosphatidylinositol-5-phosphate 4-kinase, type II, alpha | 2.843 | 0.0060704 |
| 1438052_at   | A130071D04<br>Rik | RIKEN cDNA A130071D04 gene                                | 2.844 | 0.0006432 |
| 1416127_a_at | Dnpep             | aspartyl aminopeptidase                                   | 2.844 | 0.0001181 |
| 1439501_at   | Cbara1            | calcium binding atopy-related autoantigen 1               | 2.845 | 0.0015903 |
| 1422620_s_at | Ppap2a            | phosphatidic acid phosphatase 2a                          | 2.848 | 0.0148943 |
| 1417244_a_at | Irf7              | interferon regulatory factor 7                            | 2.850 | 0.0004387 |
| 1427746_x_at | H2-K1             | histocompatibility 2, K1, K region                        | 2.851 | 0.0004747 |
| 1452016_at   | Alox5ap           | arachidonate 5-lipoxygenase activating protein            | 2.853 | 0.006033  |
| 1417370_at   | Tff3              | trefoil factor 3, intestinal                              | 2.855 | 0.0015497 |
| 1420656_at   | Abcg8             | ATP-binding cassette, sub-family G (WHITE), member 8      | 2.859 | 0.0035594 |
| 1460349_at   | Prr14             | proline rich 14                                           | 2.860 | 0.0002238 |
| 1425733_a_at | Eps8              | epidermal growth factor receptor pathway substrate 8      | 2.860 | 0.0001021 |
| 1460063_at   | D5Ertd798e        | DNA segment, Chr 5, ERATO Doi 798, expressed              | 2.860 | 0.0027327 |
| 1445534_at   | Flnb              | filamin, beta                                             | 2.864 | 0.0010464 |

|              |                |                                                        |       |           |
|--------------|----------------|--------------------------------------------------------|-------|-----------|
| 1450700_at   | Cdc42ep3       | CDC42 effector protein (Rho GTPase binding) 3          | 2.868 | 0.0051687 |
| 1433694_at   | Pde3b          | phosphodiesterase 3B, cGMP-inhibited                   | 2.868 | 0.0003054 |
| 1437358_at   | Wdfy1          | WD repeat and FYVE domain containing 1                 | 2.869 | 0.0033131 |
| 1443837_x_at | Bcl2           | B-cell leukemia/lymphoma 2                             | 2.872 | 0.0005083 |
| 1447774_x_at | 5730469M10 Rik | RIKEN cDNA 5730469M10 gene                             | 2.873 | 0.0011873 |
| 1436336_at   | Pthr1          | peptidyl-tRNA hydrolase 1 homolog (S. cerevisiae)      | 2.874 | 0.034     |
| 1416229_at   | Rfk            | riboflavin kinase                                      | 2.875 | 0.0001875 |
| 1423389_at   | Smad7          | MAD homolog 7 (Drosophila)                             | 2.875 | 0.0002032 |
| 1418031_at   | Myo9b          | myosin IXb                                             | 2.876 | 0.0006911 |
| 1417277_at   | Cyp4f16        | cytochrome P450, family 4, subfamily f, polypeptide 16 | 2.877 | 0.0003339 |
| 1460233_at   | Guca2b         | guanylate cyclase activator 2b (retina)                | 2.880 | 0.0026874 |
| 1448266_at   | Edf1           | endothelial differentiation-related factor 1           | 2.884 | 0.0008704 |
| 1423449_a_at | Actn4          | actinin alpha 4                                        | 2.885 | 0.0001955 |
| 1417070_at   | Cyp4v3         | cytochrome P450, family 4, subfamily v, polypeptide 3  | 2.886 | 0.0376899 |
| 1460342_s_at | Mprip          | myosin phosphatase Rho interacting protein             | 2.887 | 0.000842  |

|              |                   |                                                               |       |           |
|--------------|-------------------|---------------------------------------------------------------|-------|-----------|
| 1417995_at   | Ptpn22            | protein tyrosine phosphatase, non receptor type 22 (lymphoid) | 2.889 | 0.0009599 |
| 1451784_x_at | H2-D1             | histocompatibility 2, D region locus 1                        | 2.889 | 0.0009083 |
| 1455204_at   | Pitpnc1           | phosphatidylinositol transfer protein, cytoplasmic 1          | 2.902 | 0.0005926 |
| 1434153_at   | Shb               | src homology 2 domain-containing transforming protein B       | 2.903 | 0.0006258 |
| 1460722_at   | Soat2             | sterol O-acyltransferase 2                                    | 2.907 | 0.0005445 |
| 1425760_a_at | Pitpnm1           | phosphatidylinositol transfer protein, membrane-associated 1  | 2.908 | 0.0005067 |
| 1438266_at   | Adamtsl5          | ADAMTS-like 5                                                 | 2.911 | 0.001523  |
| 1451283_at   | 1810073G14<br>Rik | RIKEN cDNA 1810073G14 gene                                    | 2.912 | 0.0001033 |
| 1448029_at   | Tbx3              | T-box 3                                                       | 2.914 | 0.0001715 |
| 1425826_a_at | Sorbs1            | sorbin and SH3 domain containing 1                            | 2.919 | 0.0010138 |
| 1439107_a_at | Mll5              | myeloid/lymphoid or mixed-lineage leukemia 5                  | 2.920 | 0.0006076 |
| 1432282_a_at | Tlcd2             | TLC domain containing 2                                       | 2.920 | 7.58E-05  |
| 1423570_at   | Abcg1             | ATP-binding cassette, sub-family G (WHITE), member 1          | 2.920 | 0.0106689 |

|              |               |                                                            |       |           |
|--------------|---------------|------------------------------------------------------------|-------|-----------|
| 1452138_a_at | Ace2          | angiotensin I converting enzyme (peptidyl-dipeptidase A) 2 | 2.921 | 0.0028642 |
| 1428420_a_at | 1200009I06Rik | RIKEN cDNA 1200009I06 gene                                 | 2.921 | 0.0027157 |
| 1427165_at   | Il13ra1       | interleukin 13 receptor, alpha 1                           | 2.924 | 0.0076783 |
| 1452741_s_at | Gpd2          | glycerol phosphate dehydrogenase 2, mitochondrial          | 2.929 | 0.0031791 |
| 1427480_at   | Leap2         | liver-expressed antimicrobial peptide 2                    | 2.930 | 0.0016441 |
| 1426972_at   | Sec24d        | Sec24 related gene family, member D (S. cerevisiae)        | 2.938 | 0.0001917 |
| 1448183_a_at | Hif1a         | hypoxia inducible factor 1, alpha subunit                  | 2.938 | 0.005272  |
| 1425545_x_at | H2-L          | histocompatibility 2, D region                             | 2.939 | 0.0015055 |
| 1449908_at   | Gip           | gastric inhibitory polypeptide                             | 2.940 | 0.0009882 |
| 1429772_at   | Plxna2        | plexin A2                                                  | 2.944 | 0.0155904 |
| 1452348_s_at | Ifi205        | interferon activated gene 205                              | 2.950 | 0.0008834 |
| 1416854_at   | Slc34a2       | solute carrier family 34 (sodium phosphate), member 2      | 2.958 | 0.0084008 |
| 1455899_x_at | Socs3         | suppressor of cytokine signaling 3                         | 2.963 | 0.0002521 |
| 1416708_a_at | Gramd1a       | GRAM domain containing 1A                                  | 2.965 | 0.00119   |

|              |             |                                                          |       |           |
|--------------|-------------|----------------------------------------------------------|-------|-----------|
| 1434920_a_at | Evl         | Ena-vasodilator stimulated phosphoprotein                | 2.969 | 0.0007063 |
| 1419248_at   | Rgs2        | regulator of G-protein signaling 2                       | 2.974 | 0.0003301 |
| 1452329_at   | Plekhn1     | pleckstrin homology domain containing, family N member 1 | 2.975 | 0.0023801 |
| 1454680_at   | D5Erttd579e | DNA segment, Chr 5, ERATO Doi 579, expressed             | 2.978 | 0.0001027 |
| 1417279_at   | Itpr1       | inositol 1,4,5-triphosphate receptor 1                   | 2.982 | 0.0036957 |
| 1448467_a_at | Ehbp111     | EH domain binding protein 1-like 1                       | 2.986 | 0.0009725 |
| 1427885_at   | Pold4       | polymerase (DNA directed), delta 4                       | 2.986 | 0.0004647 |
| 1419450_at   | Ormdl3      | ORM1-like 3 (S. cerevisiae)                              | 2.987 | 0.0012317 |
| 1450006_at   | Ncoa4       | nuclear receptor coactivator 4                           | 2.996 | 0.0016587 |
| 1417071_s_at | Cyp4v3      | cytochrome P450, family 4, subfamily v, polypeptide 3    | 3.001 | 0.0023587 |
| 1452771_s_at | Acsl3       | acyl-CoA synthetase long-chain family member 3           | 3.002 | 9.39E-05  |
| 1424575_at   | Rab15       | RAB, member of RAS oncogene family-like 5                | 3.004 | 0.0003243 |
| 1428347_at   | Cyfp2       | cytoplasmic FMR1 interacting protein 2                   | 3.006 | 0.0009994 |

|              |               |                                                        |       |           |
|--------------|---------------|--------------------------------------------------------|-------|-----------|
| 1426534_a_at | Arfgap3       | ADP-ribosylation factor GTPase activating protein 3    | 3.008 | 0.0003631 |
| 1460192_at   | Osbpl1a       | oxysterol binding protein-like 1A                      | 3.012 | 0.0001374 |
| 1423986_a_at | Shisa5        | shisa homolog 5 (Xenopus laevis)                       | 3.018 | 0.0001516 |
| 1437462_x_at | Mmp15         | matrix metalloproteinase 15                            | 3.020 | 0.012013  |
| 1427910_at   | Cst6          | cystatin E/M                                           | 3.021 | 0.0018831 |
| 1424779_at   | Reep3         | receptor accessory protein 3                           | 3.025 | 0.000302  |
| 1438514_at   | Npc111        | NPC1-like 1                                            | 3.027 | 0.000557  |
| 1426716_at   | Tdrd7         | tudor domain containing 7                              | 3.029 | 0.0002579 |
| 1442163_at   | NA            | NA                                                     | 3.032 | 0.0007628 |
| 1421066_at   | Jak2          | Janus kinase 2                                         | 3.033 | 7.99E-05  |
| 1445695_at   | NA            | NA                                                     | 3.035 | 0.000512  |
| 1418131_at   | Samhd1        | SAM domain and HD domain, 1                            | 3.041 | 0.000147  |
| 1419039_at   | Cyp2d22       | cytochrome P450, family 2, subfamily d, polypeptide 22 | 3.042 | 0.0005548 |
| 1439259_x_at | Abhd4         | abhydrolase domain containing 4                        | 3.042 | 7.20E-05  |
| 1428383_a_at | 2310021P13Rik | RIKEN cDNA 2310021P13 gene                             | 3.043 | 0.0008114 |
| 1434059_at   | B230312A22Rik | RIKEN cDNA B230312A22 gene                             | 3.045 | 0.0001667 |
| 1442453_at   | Fcho2         | FCH domain only 2                                      | 3.047 | 0.0007176 |
| 1422678_at   | Dgat2         | diacylglycerol O-acyltransferase 2                     | 3.048 | 0.001099  |

|              |         |                                                                            |       |           |
|--------------|---------|----------------------------------------------------------------------------|-------|-----------|
| 1425747_at   | Dock5   | dedicator of cytokinesis 5                                                 | 3.050 | 0.0007367 |
| 1448233_at   | Prnp    | prion protein                                                              | 3.050 | 7.32E-05  |
| 1421269_at   | Ugcg    | UDP-glucose ceramide glucosyltransferase                                   | 3.052 | 0.0002309 |
| 1460330_at   | Anxa3   | annexin A3                                                                 | 3.056 | 0.0028205 |
| 1450744_at   | Ell2    | elongation factor RNA polymerase II 2                                      | 3.057 | 5.95E-05  |
| 1427199_at   | Fryl    | furry homolog-like (Drosophila)                                            | 3.060 | 0.0002042 |
| 1421873_s_at | Rab24   | RAB24, member RAS oncogene family                                          | 3.061 | 0.000328  |
| 1422147_a_at | Pla2g6  | phospholipase A2, group VI                                                 | 3.061 | 0.0018553 |
| 1417116_at   | Slc6a8  | solute carrier family 6 (neurotransmitter transporter, creatine), member 8 | 3.066 | 7.49E-05  |
| 1416230_at   | Rfk     | riboflavin kinase                                                          | 3.068 | 0.0001135 |
| 1451714_a_at | Map2k3  | mitogen-activated protein kinase kinase 3                                  | 3.069 | 0.000102  |
| 1452368_at   | Bcr     | breakpoint cluster region                                                  | 3.071 | 0.0005246 |
| 1448566_at   | Slc40a1 | solute carrier family 40 (iron-regulated transporter), member 1            | 3.074 | 0.0145907 |
| 1425102_a_at | Ace2    | angiotensin I converting enzyme (peptidyl-dipeptidase A) 2                 | 3.082 | 0.0024482 |
| 1449043_at   | Naga    | N-acetyl galactosaminidase, alpha                                          | 3.092 | 0.000366  |

|                              |               |                                                              |       |           |
|------------------------------|---------------|--------------------------------------------------------------|-------|-----------|
| 1457794_at                   | Whsc111       | Wolf-Hirschhorn syndrome candidate 1-like 1 (human)          | 3.096 | 0.0042563 |
| 1435653_at                   | NA            | NA                                                           | 3.099 | 0.0001392 |
| 1457605_at                   | NA            | NA                                                           | 3.104 | 0.0071417 |
| 1417856_at                   | Relb          | avian reticuloendotheliosis viral (v-rel) oncogene related B | 3.104 | 0.0003617 |
| 1418149_at                   | Chga          | chromogranin A                                               | 3.107 | 0.0006233 |
| 1438011_at                   | Pcyt1a        | phosphate cytidyltransferase 1, choline, alpha isoform       | 3.108 | 0.0004196 |
| 1447421_at                   | NA            | NA                                                           | 3.110 | 0.00153   |
| AFFX-PyruCarbMur/L09192_3_at | Pcx           | pyruvate carboxylase                                         | 3.116 | 6.10E-05  |
| 1456623_at                   | Tpm1          | tropomyosin 1, alpha                                         | 3.120 | 0.0006434 |
| 1435394_s_at                 | Rhoc          | ras homolog gene family, member C                            | 3.120 | 0.0003534 |
| 1460603_at                   | Samd9l        | sterile alpha motif domain containing 9-like                 | 3.127 | 0.0002994 |
| 1425122_at                   | ORF9          | open reading frame 9                                         | 3.128 | 0.0001487 |
| 1416275_at                   | Slc26a6       | solute carrier family 26, member 6                           | 3.129 | 0.0011266 |
| 1427980_at                   | 4933407C03Rik | RIKEN cDNA 4933407C03 gene                                   | 3.131 | 5.37E-05  |
| 1427329_a_at                 | Igh-6         | immunoglobulin heavy chain 6 (heavy chain of IgM)            | 3.132 | 0.0003388 |
| 1460255_at                   | Tnfsf13b      | tumor necrosis factor (ligand) superfamily, member 13b       | 3.135 | 0.0084425 |



|              |                   |                                                                    |       |           |
|--------------|-------------------|--------------------------------------------------------------------|-------|-----------|
| 1436905_x_at | Laptm5            | lysosomal-associated protein transmembrane 5                       | 3.135 | 0.0033771 |
| 1424053_a_at | Tcf25             | transcription factor 25 (basic helix-loop-helix)                   | 3.138 | 0.0001451 |
| 1435857_s_at | Aplp1             | amyloid beta (A4) precursor-like protein 1                         | 3.138 | 0.0001235 |
| 1416304_at   | Litaf             | LPS-induced TN factor                                              | 3.139 | 9.74E-05  |
| 1452784_at   | Itgav             | integrin alpha V                                                   | 3.141 | 5.43E-05  |
| 1452381_at   | Creb3l2           | cAMP responsive element binding protein 3-like 2                   | 3.145 | 0.000567  |
| 1460579_at   | Dnpep             | aspartyl aminopeptidase                                            | 3.145 | 0.0041504 |
| 1429692_s_at | Gch1              | GTP cyclohydrolase 1                                               | 3.148 | 0.0002063 |
| 1423613_at   | Ssfa2             | sperm specific antigen 2                                           | 3.152 | 0.0003317 |
| 1428466_at   | Chd3              | chromodomain helicase DNA binding protein 3                        | 3.169 | 0.0001996 |
| 1425019_at   | Ubxn2a            | UBX domain protein 2A                                              | 3.179 | 0.0059981 |
| 1451486_at   | Slc46a3           | solute carrier family 46, member 3                                 | 3.179 | 0.0003116 |
| 1435549_at   | Trpm4             | transient receptor potential cation channel, subfamily M, member 4 | 3.179 | 0.0002317 |
| 1426893_at   | C230093N12<br>Rik | RIKEN cDNA C230093N12 gene                                         | 3.179 | 0.0001147 |
| 1435749_at   | Gda               | guanine deaminase                                                  | 3.181 | 9.55E-05  |
| 1418578_at   | Dgka              | diacylglycerol kinase, alpha                                       | 3.192 | 4.02E-05  |

|              |         |                                                      |       |           |
|--------------|---------|------------------------------------------------------|-------|-----------|
| 1433910_at   | Zcchc6  | zinc finger, CCHC domain containing 6                | 3.198 | 5.56E-05  |
| 1417214_at   | Rab27b  | RAB27b, member RAS oncogene family                   | 3.205 | 0.0068297 |
| 1417300_at   | Smpdl3b | sphingomyelin phosphodiesterase, acid-like 3B        | 3.205 | 0.0003562 |
| 1434140_at   | Mcf2l   | mcf.2 transforming sequence-like                     | 3.210 | 0.0008252 |
| 1424287_at   | Prkx    | protein kinase, X-linked                             | 3.210 | 0.0011517 |
| 1448562_at   | Upp1    | uridine phosphorylase 1                              | 3.215 | 0.0002242 |
| 1417434_at   | Gpd2    | glycerol phosphate dehydrogenase 2, mitochondrial    | 3.217 | 0.0001904 |
| 1452231_x_at | Ifi205  | interferon activated gene 205                        | 3.217 | 0.0002329 |
| 1429262_at   | Rassf6  | Ras association (RalGDS/AF-6) domain family member 6 | 3.219 | 9.48E-05  |
| 1420808_at   | Ncoa4   | nuclear receptor coactivator 4                       | 3.223 | 0.0003473 |
| 1424948_x_at | H2-K1   | histocompatibility 2, K1, K region                   | 3.227 | 0.0008663 |
| 1424040_at   | Mtap7d1 | microtubule-associated protein 7 domain containing 1 | 3.231 | 0.000304  |
| 1417292_at   | Ifi47   | interferon gamma inducible protein 47                | 3.235 | 4.13E-05  |
| 1437205_at   | Tcf25   | transcription factor 25 (basic helix-loop-helix)     | 3.238 | 0.000667  |

|              |               |                                                                 |       |           |
|--------------|---------------|-----------------------------------------------------------------|-------|-----------|
| 1451755_a_at | Apobec1       | apolipoprotein B mRNA editing enzyme, catalytic polypeptide 1   | 3.240 | 4.05E-05  |
| 1429197_s_at | Rabgap1l      | RAB GTPase activating protein 1-like                            | 3.257 | 0.0012876 |
| 1424453_at   | Pcyt1a        | phosphate cytidyltransferase 1, choline, alpha isoform          | 3.257 | 0.002021  |
| 1451261_s_at | Stap2         | signal transducing adaptor family member 2                      | 3.258 | 8.38E-05  |
| 1416194_at   | Cyp4b1        | cytochrome P450, family 4, subfamily b, polypeptide 1           | 3.259 | 0.0021173 |
| 1419656_at   | Slc25a36      | solute carrier family 25, member 36                             | 3.259 | 0.0007898 |
| 1425994_a_at | Asah2         | N-acylsphingosine amidohydrolase 2                              | 3.267 | 0.0008342 |
| 1422975_at   | Mme           | membrane metallo endopeptidase                                  | 3.279 | 0.0016693 |
| 1435748_at   | Gda           | guanine deaminase                                               | 3.282 | 3.64E-05  |
| 1439050_at   | NA            | NA                                                              | 3.290 | 0.0003613 |
| 1416424_at   | M6prbp1       | mannose-6-phosphate receptor binding protein 1                  | 3.292 | 8.67E-05  |
| 1434302_at   | Raph1         | Ras association (RalGDS/AF-6) and pleckstrin homology domains 1 | 3.295 | 8.75E-05  |
| 1428671_at   | 2200002D01Rik | RIKEN cDNA 2200002D01 gene                                      | 3.296 | 3.51E-05  |

|              |          |                                                     |       |           |
|--------------|----------|-----------------------------------------------------|-------|-----------|
| 1430984_at   | Azin1    | antizyme inhibitor 1                                | 3.300 | 0.0043381 |
| 1424775_at   | Oas1g    | 2@#%&-<br>5@#%&<br>oligoadenylate synthetase 1G     | 3.303 | 3.22E-05  |
| 1416804_at   | Ehbp111  | EH domain binding protein 1-like 1                  | 3.307 | 0.0007113 |
| 1423626_at   | Dst      | dystonin                                            | 3.317 | 3.51E-05  |
| 1450734_at   | Sec16b   | SEC16 homolog B ( <i>S. cerevisiae</i> )            | 3.323 | 0.0001314 |
| 1450726_at   | Asah2    | N-acylsphingosine amidohydrolase 2                  | 3.324 | 0.0005256 |
| 1427386_at   | Arhgef16 | Rho guanine nucleotide exchange factor (GEF) 16     | 3.326 | 3.95E-05  |
| 1430527_a_at | Rnf167   | ring finger protein 167                             | 3.330 | 0.0003761 |
| 1451753_at   | Plxna2   | plexin A2                                           | 3.335 | 0.0015797 |
| 1448499_a_at | Ephx2    | epoxide hydrolase 2, cytoplasmic                    | 3.344 | 0.0003146 |
| 1449455_at   | Hck      | hemopoietic cell kinase                             | 3.345 | 0.0001707 |
| 1417961_a_at | Trim30   | tripartite motif-containing 30                      | 3.363 | 9.29E-05  |
| 1420505_a_at | Stxbp1   | syntaxin binding protein 1                          | 3.364 | 0.0006878 |
| 1426799_at   | Rab8b    | RAB8B, member RAS oncogene family                   | 3.366 | 8.17E-05  |
| 1439796_at   | AI747448 | expressed sequence AI747448                         | 3.374 | 0.0017801 |
| 1455056_at   | Lmo7     | LIM domain only 7                                   | 3.402 | 8.62E-05  |
| 1450572_at   | Akp3     | alkaline phosphatase 3, intestine, not Mn requiring | 3.404 | 0.0089442 |

|              |         |                                                        |       |           |
|--------------|---------|--------------------------------------------------------|-------|-----------|
| 1424286_at   | Prkx    | protein kinase, X-linked                               | 3.419 | 0.0001183 |
| 1429049_at   | Nuak2   | NUAK family, SNF1-like kinase, 2                       | 3.423 | 5.24E-05  |
| 1451779_at   | Pyroxd1 | pyridine nucleotide-disulphide oxidoreductase domain 1 | 3.426 | 0.0004579 |
| 1451683_x_at | H2-K1   | histocompatibility 2, K1, K region                     | 3.427 | 0.001835  |
| 1420493_a_at | Pcyt2   | phosphate cytidyltransferase 2, ethanolamine           | 3.430 | 2.61E-05  |
| 1435679_at   | Optn    | optineurin                                             | 3.430 | 5.05E-05  |
| 1446324_at   | NA      | NA                                                     | 3.432 | 0.0008197 |
| 1422703_at   | Gyk     | glycerol kinase                                        | 3.434 | 0.0048345 |
| 1457271_at   | Gm131   | gene model 131, (NCBI)                                 | 3.442 | 0.001004  |
| 1418762_at   | Cd55    | CD55 antigen                                           | 3.451 | 5.67E-05  |
| 1424529_s_at | Cgref1  | cell growth regulator with EF hand domain 1            | 3.451 | 0.0003254 |
| 1416338_at   | Sh3gl1  | SH3-domain GRB2-like 1                                 | 3.457 | 0.0004386 |
| 1433842_at   | Lrrfip1 | leucine rich repeat (in FLII) interacting protein 1    | 3.459 | 6.89E-05  |
| 1448798_at   | Eps8l3  | ESP8-like 3                                            | 3.461 | 5.20E-05  |
| 1430172_a_at | Cyp4f16 | cytochrome P450, family 4, subfamily f, polypeptide 16 | 3.465 | 8.72E-05  |
| 1448485_at   | Ggt1    | gamma-glutamyltransferase 1                            | 3.470 | 0.0004951 |
| 1426100_a_at | Tk2     | thymidine kinase 2, mitochondrial                      | 3.471 | 0.0022644 |

|              |                   |                                                                                                        |       |           |
|--------------|-------------------|--------------------------------------------------------------------------------------------------------|-------|-----------|
| 1452351_at   | C030027K23<br>Rik | RIKEN cDNA<br>C030027K23<br>gene                                                                       | 3.474 | 0.0009756 |
| 1447818_x_at | Rheb1             | Ras homolog<br>enriched in brain<br>like 1                                                             | 3.479 | 2.86E-05  |
| 1425120_x_at | 1810023F06R<br>ik | RIKEN cDNA<br>1810023F06<br>gene                                                                       | 3.489 | 0.0001893 |
| 1452836_at   | Lpin2             | lipin 2                                                                                                | 3.489 | 0.000247  |
| 1426454_at   | Arhgdib           | Rho, GDP<br>dissociation<br>inhibitor (GDI)<br>beta                                                    | 3.511 | 0.000248  |
| 1418734_at   | H2-Q1             | histocompatibility<br>2, Q region locus<br>1                                                           | 3.516 | 0.0006246 |
| 1439114_at   | Ddx60             | DEAD (Asp-Glu-<br>Ala-Asp) box<br>polypeptide 60                                                       | 3.519 | 0.002901  |
| 1427689_a_at | Tnip1             | TNFAIP3<br>interacting protein<br>1                                                                    | 3.523 | 3.33E-05  |
| 1456120_at   | 3110001I20Ri<br>k | RIKEN cDNA<br>3110001I20 gene                                                                          | 3.539 | 0.0001148 |
| 1456888_at   | Pfkfb4            | 6-phosphofructo-<br>2-kinase/fructose-<br>2,6-<br>biphosphatase 4                                      | 3.545 | 5.71E-05  |
| 1416303_at   | Litaf             | LPS-induced TN<br>factor                                                                               | 3.551 | 6.46E-05  |
| 1451916_s_at | Trim15            | tripartite motif-<br>containing 15                                                                     | 3.558 | 0.0003309 |
| 1430890_at   | 2210010C17R<br>ik | RIKEN cDNA<br>2210010C17<br>gene                                                                       | 3.566 | 0.0001159 |
| 1426743_at   | Appl2             | adaptor protein,<br>phosphotyrosine<br>interaction, PH<br>domain and<br>leucine zipper<br>containing 2 | 3.573 | 6.06E-05  |

|              |               |                                                        |       |           |
|--------------|---------------|--------------------------------------------------------|-------|-----------|
| 1420841_at   | Ptprf         | protein tyrosine phosphatase, receptor type, F         | 3.573 | 0.0026292 |
| 1449556_at   | H2-T23        | histocompatibility 2, T region locus 23                | 3.573 | 0.0001058 |
| 1445626_at   | NA            | NA                                                     | 3.596 | 1.98E-05  |
| 1425732_a_at | Mxi1          | Max interacting protein 1                              | 3.598 | 0.0001741 |
| 1419613_at   | Col7a1        | collagen, type VII, alpha 1                            | 3.600 | 0.0016062 |
| 1415885_at   | Chgb          | chromogranin B                                         | 3.603 | 8.17E-05  |
| 1446281_at   | NA            | NA                                                     | 3.605 | 0.0014474 |
| 1453283_at   | Pgm1          | phosphoglucomutase 1                                   | 3.613 | 9.86E-05  |
| 1448683_at   | Cyp2d26       | cytochrome P450, family 2, subfamily d, polypeptide 26 | 3.614 | 0.0036867 |
| 1449424_at   | Plek2         | pleckstrin 2                                           | 3.619 | 0.000783  |
| 1438074_at   | 2210010C17Rik | RIKEN cDNA 2210010C17 gene                             | 3.621 | 2.24E-05  |
| 1419247_at   | Rgs2          | regulator of G-protein signaling 2                     | 3.633 | 6.12E-05  |
| 1434046_at   | AA467197      | expressed sequence AA467197                            | 3.647 | 0.000125  |
| 1449220_at   | Gimap3        | GTPase, IMAP family member 3                           | 3.647 | 0.0002935 |
| 1426284_at   | Krt20         | keratin 20                                             | 3.650 | 2.10E-05  |
| 1441026_at   | Parp4         | poly (ADP-ribose) polymerase family, member 4          | 3.659 | 0.0011267 |
| 1442849_at   | Lrp1          | low density lipoprotein receptor-related protein 1     | 3.661 | 0.003332  |

|              |                |                                                                   |       |           |
|--------------|----------------|-------------------------------------------------------------------|-------|-----------|
| 1422257_s_at | Cyp2b10        | cytochrome P450, family 2, subfamily b, polypeptide 10            | 3.667 | 0.0049965 |
| 1433465_a_at | AI467606       | expressed sequence AI467606                                       | 3.673 | 0.001588  |
| 1419393_at   | Abcg5          | ATP-binding cassette, sub-family G (WHITE), member 5              | 3.677 | 0.0001531 |
| 1441823_at   | Zmiz1          | zinc finger, MIZ-type containing 1                                | 3.689 | 0.0002099 |
| 1438311_at   | 2010002M12 Rik | RIKEN cDNA 2010002M12 gene                                        | 3.693 | 2.06E-05  |
| 1425837_a_at | Ccrn4l         | CCR4 carbon catabolite repression 4-like ( <i>S. cerevisiae</i> ) | 3.695 | 2.22E-05  |
| 1429778_at   | Optn           | optineurin                                                        | 3.706 | 1.79E-05  |
| 1429215_at   | 2310058N22Rik  | RIKEN cDNA 2310058N22 gene                                        | 3.730 | 0.0001317 |
| 1422847_a_at | Prkcd          | protein kinase C, delta                                           | 3.731 | 2.84E-05  |
| 1421594_a_at | Sytl2          | synaptotagmin-like 2                                              | 3.743 | 0.0003553 |
| 1457253_at   | Trim40         | tripartite motif-containing 40                                    | 3.746 | 2.17E-05  |
| 1428484_at   | Osbpl3         | oxysterol binding protein-like 3                                  | 3.747 | 2.27E-05  |
| 1449968_s_at | Acot10         | acyl-CoA thioesterase 10                                          | 3.748 | 4.12E-05  |
| 1439038_at   | 9130227C08Rik  | RIKEN cDNA 9130227C08Rik gene                                     | 3.758 | 0.0001625 |
| 1451206_s_at | Cytip          | cytohesin 1 interacting protein                                   | 3.776 | 0.0003814 |
| 1417843_s_at | Eps8l2         | EPS8-like 2                                                       | 3.779 | 1.49E-05  |
| 1416488_at   | Ccng2          | cyclin G2                                                         | 3.781 | 1.83E-05  |
| 1459667_at   | Arhgap17       | Rho GTPase activating protein 17                                  | 3.789 | 3.03E-05  |



|              |                   |                                                                 |       |           |
|--------------|-------------------|-----------------------------------------------------------------|-------|-----------|
| 1439599_at   | Gal3st2           | galactose-3-O-sulfotransferase 2                                | 3.802 | 0.0002258 |
| 1425921_a_at | 1810055G02<br>Rik | RIKEN cDNA<br>1810055G02<br>gene                                | 3.810 | 0.0004489 |
| 1426014_a_at | Mupcdh            | mucin-like<br>protocadherin                                     | 3.811 | 0.0004852 |
| 1434089_at   | Synpo             | synaptopodin                                                    | 3.811 | 9.65E-05  |
| 1456061_at   | Gimap8            | GTPase, IMAP<br>family member 8                                 | 3.856 | 0.0001139 |
| 1453596_at   | Id2               | inhibitor of DNA<br>binding 2                                   | 3.870 | 1.44E-05  |
| 1419523_at   | Cyp3a13           | cytochrome<br>P450, family 3,<br>subfamily a,<br>polypeptide 13 | 3.871 | 5.31E-05  |
| 1436959_x_at | Nelf              | nasal embryonic<br>LHRH factor                                  | 3.874 | 0.0001996 |
| 1434067_at   | AI662270          | expressed<br>sequence<br>AI662270                               | 3.880 | 0.0011028 |
| 1419226_at   | Cd96              | CD96 antigen                                                    | 3.905 | 0.0014275 |
| 1452270_s_at | Cubn              | cubilin (intrinsic<br>factor-cobalamin<br>receptor)             | 3.909 | 0.003102  |
| 1437045_at   | Mapk8             | mitogen-activated<br>protein kinase 8                           | 3.909 | 1.76E-05  |
| 1428573_at   | Chn2              | chimerin<br>(chimaerin) 2                                       | 3.915 | 0.0001968 |
| 1424148_a_at | Stap2             | signal<br>transducing<br>adaptor family<br>member 2             | 3.927 | 5.69E-05  |
| 1452833_at   | Rapgef2           | Rap guanine<br>nucleotide<br>exchange factor<br>(GEF) 2         | 3.930 | 6.40E-05  |
| 1437542_at   | Ikzf2             | IKAROS family<br>zinc finger 2                                  | 3.955 | 9.93E-05  |
| 1428435_at   | Muc2              | mucin 2                                                         | 3.964 | 0.0001769 |

|              |                   |                                                         |       |           |
|--------------|-------------------|---------------------------------------------------------|-------|-----------|
| 1431077_at   | Alpi              | alkaline phosphatase, intestinal                        | 3.982 | 8.21E-05  |
| 1439808_at   | A130090K04<br>Rik | RIKEN cDNA A130090K04 gene                              | 3.984 | 0.0003031 |
| 1450109_s_at | Abcc2             | ATP-binding cassette, sub-family C (CFTR/MRP), member 2 | 3.986 | 0.0006269 |
| 1425470_at   | NA                | NA                                                      | 3.988 | 0.0001105 |
| 1456195_x_at | Itgb5             | integrin beta 5                                         | 3.994 | 7.75E-05  |
| 1426808_at   | Lgals3            | lectin, galactose binding, soluble 3                    | 4.012 | 1.13E-05  |
| 1449453_at   | Bst1              | bone marrow stromal cell antigen 1                      | 4.013 | 0.0004608 |
| 1439109_at   | Ccdc68            | coiled-coil domain containing 68                        | 4.027 | 2.06E-05  |
| 1426276_at   | Ifih1             | interferon induced with helicase C domain 1             | 4.075 | 3.05E-05  |
| 1418278_at   | Apoc3             | apolipoprotein C-III                                    | 4.078 | 2.94E-05  |
| 1437918_at   | 4930539E08R<br>ik | RIKEN cDNA 4930539E08 gene                              | 4.080 | 6.10E-05  |
| 1455854_a_at | Ssh1              | slingshot homolog 1 (Drosophila)                        | 4.085 | 0.0001888 |
| 1417954_at   | Sst               | somatostatin                                            | 4.088 | 9.55E-05  |
| 1451516_at   | Rheb1l            | Ras homolog enriched in brain like 1                    | 4.088 | 3.61E-05  |
| 1455033_at   | B430201A12<br>Rik | RIKEN cDNA B430201A12 gene                              | 4.094 | 0.0001394 |
| 1450199_a_at | Stab1             | stabilin 1                                              | 4.113 | 5.12E-05  |
| 1437432_a_at | Trim12            | tripartite motif-containing 12                          | 4.121 | 7.83E-05  |
| 1426413_at   | Neurod1           | neurogenic differentiation 1                            | 4.143 | 0.0009244 |

|              |               |                                                                                               |       |           |
|--------------|---------------|-----------------------------------------------------------------------------------------------|-------|-----------|
| 1426412_at   | Neurod1       | neurogenic differentiation 1                                                                  | 4.155 | 0.0001121 |
| 1420426_at   | Myo7b         | myosin VIIb                                                                                   | 4.190 | 1.69E-05  |
| 1450987_a_at | 2310004I24Rik | RIKEN cDNA 2310004I24 gene                                                                    | 4.193 | 9.30E-06  |
| 1422868_s_at | Gda           | guanine deaminase                                                                             | 4.201 | 1.36E-05  |
| 1456377_x_at | Limd2         | LIM domain containing 2                                                                       | 4.205 | 0.000171  |
| 1418641_at   | Lcp2          | lymphocyte cytosolic protein 2                                                                | 4.206 | 0.0001631 |
| 1455269_a_at | Coro1a        | coronin, actin binding protein 1A                                                             | 4.208 | 2.51E-05  |
| 1436297_a_at | Grina         | glutamate receptor, ionotropic, N-methyl D-aspartate-associated protein 1 (glutamate binding) | 4.212 | 1.13E-05  |
| 1436904_at   | Med13         | mediator complex subunit 13                                                                   | 4.236 | 0.000182  |
| 1421065_at   | Jak2          | Janus kinase 2                                                                                | 4.239 | 1.95E-05  |
| 1426774_at   | Parp12        | poly (ADP-ribose) polymerase family, member 12                                                | 4.250 | 3.36E-05  |
| 1450531_at   | H2-BI         | histocompatibility 2, blastocyst                                                              | 4.253 | 7.12E-05  |
| 1432004_a_at | Dnm2          | dynamamin 2                                                                                   | 4.262 | 0.0001323 |
| 1419478_at   | Sectm1b       | secreted and transmembrane 1B                                                                 | 4.264 | 0.0001386 |
| 1438606_a_at | Clic4         | chloride intracellular channel 4 (mitochondrial)                                              | 4.275 | 1.74E-05  |
| 1443341_at   | NA            | NA                                                                                            | 4.278 | 7.93E-05  |

|              |         |                                                                                              |       |           |
|--------------|---------|----------------------------------------------------------------------------------------------|-------|-----------|
| 1424451_at   | Acaa1b  | acetyl-Coenzyme A acyltransferase 1B                                                         | 4.281 | 4.24E-05  |
| 1440795_x_at | Rabep2  | rabaptin, RAB GTPase binding effector protein 2                                              | 4.287 | 8.50E-06  |
| 1417965_at   | Plekha1 | pleckstrin homology domain containing, family A (phosphoinositide binding specific) member 1 | 4.300 | 6.40E-06  |
| 1436890_at   | Uap111  | UDP-N-acetylglucosamine pyrophosphorylase 1-like 1                                           | 4.311 | 9.10E-06  |
| 1456014_s_at | Trpt1   | tRNA phosphotransferase 1                                                                    | 4.330 | 0.0005546 |
| 1460081_at   | Syt7    | synaptotagmin VII                                                                            | 4.332 | 0.0006485 |
| 1448409_at   | Lrmp    | lymphoid-restricted membrane protein                                                         | 4.336 | 2.85E-05  |
| 1416639_at   | Slc2a5  | solute carrier family 2 (facilitated glucose transporter), member 5                          | 4.337 | 0.0010305 |
| 1424090_at   | Sdcbp2  | syndecan binding protein (syntenin) 2                                                        | 4.339 | 0.0002359 |
| 1437122_at   | Bcl2    | B-cell leukemia/lymphoma 2                                                                   | 4.361 | 0.0005698 |
| 1455593_at   | Apob    | apolipoprotein B                                                                             | 4.390 | 0.0001848 |
| 1429060_at   | Malat1  | metastasis associated lung adenocarcinoma transcript 1 (non-coding RNA)                      | 4.404 | 8.90E-06  |

|              |          |                                                                               |       |           |
|--------------|----------|-------------------------------------------------------------------------------|-------|-----------|
| 1441622_at   | EG433023 | predicted gene,<br>EG433023                                                   | 4.415 | 9.80E-06  |
| 1446417_at   | NA       | NA                                                                            | 4.427 | 3.58E-05  |
| 1449430_a_at | Treh     | trehalase (brush-<br>border membrane<br>glycoprotein)                         | 4.440 | 0.0001633 |
| 1443698_at   | Xaf1     | XIAP associated<br>factor 1                                                   | 4.449 | 0.0001235 |
| 1417395_at   | Klf4     | Kruppel-like<br>factor 4 (gut)                                                | 4.452 | 5.80E-06  |
| 1426970_a_at | Ube1l    | ubiquitin-<br>activating<br>enzyme E1-like                                    | 4.458 | 5.30E-06  |
| 1427963_s_at | Rdh9     | retinol<br>dehydrogenase 9                                                    | 4.460 | 0.0010836 |
| 1429947_a_at | Zbp1     | Z-DNA binding<br>protein 1                                                    | 4.471 | 0.0002166 |
| 1427007_at   | Sash3    | SAM and SH3<br>domain<br>containing 3                                         | 4.486 | 0.0002285 |
| 1442434_at   | D8Ert82e | DNA segment,<br>Chr 8, ERATO<br>Doi 82,<br>expressed                          | 4.491 | 6.20E-06  |
| 1426906_at   | Ifi205   | interferon<br>activated gene<br>205                                           | 4.523 | 3.81E-05  |
| 1415834_at   | Dusp6    | dual specificity<br>phosphatase 6                                             | 4.533 | 4.90E-06  |
| 1448364_at   | Ccng2    | cyclin G2                                                                     | 4.555 | 1.99E-05  |
| 1455442_at   | Slc6a19  | solute carrier<br>family 6<br>(neurotransmitter<br>transporter),<br>member 19 | 4.559 | 0.0004542 |
| 1416809_at   | Cyp3a11  | cytochrome<br>P450, family 3,<br>subfamily a,<br>polypeptide 11               | 4.582 | 8.14E-05  |
| 1428767_at   | Gsdmd    | gasdermin D                                                                   | 4.585 | 2.35E-05  |

|              |               |                                                                        |       |           |
|--------------|---------------|------------------------------------------------------------------------|-------|-----------|
| 1422785_at   | Rasa2         | RAS p21 protein activator 2                                            | 4.596 | 2.88E-05  |
| 1428851_at   | 1300014I06Rik | RIKEN cDNA 1300014I06 gene                                             | 4.618 | 2.77E-05  |
| 1420461_at   | Mst1r         | macrophage stimulating 1 receptor (c-met-related tyrosine kinase)      | 4.621 | 1.01E-05  |
| 1417620_at   | Rac2          | RAS-related C3 botulinum substrate 2                                   | 4.631 | 4.65E-05  |
| 1418539_a_at | Ptpre         | protein tyrosine phosphatase, receptor type, E                         | 4.652 | 0.0001079 |
| 1417812_a_at | Lamb3         | laminin, beta 3                                                        | 4.682 | 0.0003207 |
| 1436504_x_at | Apoa4         | apolipoprotein A-IV                                                    | 4.699 | 1.04E-05  |
| 1437486_at   | Gprc5a        | G protein-coupled receptor, family C, group 5, member A                | 4.705 | 0.0006471 |
| 1453196_a_at | Oasl2         | 2@#%&-5@#%& oligoadenylate synthetase-like 2                           | 4.714 | 7.50E-06  |
| 1424626_at   | 2010003K11Rik | RIKEN cDNA 2010003K11 gene                                             | 4.753 | 1.23E-05  |
| 1418536_at   | H2-Q7         | histocompatibility 2, Q region locus 7                                 | 4.767 | 5.90E-06  |
| 1452653_at   | Slc25a22      | solute carrier family 25 (mitochondrial carrier, glutamate), member 22 | 4.782 | 1.16E-05  |
| 1426971_at   | Ube1l         | ubiquitin-activating enzyme E1-like                                    | 4.808 | 3.80E-06  |

|              |         |                                                |       |           |
|--------------|---------|------------------------------------------------|-------|-----------|
| 1437176_at   | Nlrc5   | NLR family, CARD domain containing 5           | 4.813 | 4.14E-05  |
| 1419322_at   | Fgd6    | FYVE, RhoGEF and PH domain containing 6        | 4.816 | 0.0001634 |
| 1439016_x_at | Sprr2a  | small proline-rich protein 2A                  | 4.829 | 4.04E-05  |
| 1436631_at   | Ctnna1  | catenin (cadherin associated protein), alpha 1 | 4.851 | 3.40E-06  |
| 1427347_s_at | Tubb2a  | tubulin, beta 2a                               | 4.877 | 0.0001229 |
| 1440311_at   | Sorbs1  | sorbin and SH3 domain containing 1             | 4.914 | 0.0002462 |
| 1437308_s_at | F2r     | coagulation factor II (thrombin) receptor      | 4.917 | 9.46E-05  |
| 1418580_at   | Rtp4    | receptor transporter protein 4                 | 4.955 | 9.00E-06  |
| 1416770_at   | Stk25   | serine/threonine kinase 25 (yeast)             | 4.957 | 3.10E-06  |
| 1427419_x_at | Ccr9    | chemokine (C-C motif) receptor 9               | 4.959 | 2.80E-06  |
| 1434830_at   | Mxd1    | MAX dimerization protein 1                     | 4.971 | 7.00E-06  |
| 1415983_at   | Lcp1    | lymphocyte cytosolic protein 1                 | 4.978 | 1.68E-05  |
| 1418931_at   | Reg4    | regenerating islet-derived family, member 4    | 5.000 | 7.93E-05  |
| 1448437_a_at | Gtpbp2  | GTP binding protein 2                          | 5.038 | 0.0004745 |
| 1426714_at   | Slc46a1 | solute carrier family 46, member 1             | 5.068 | 0.0003423 |
| 1427440_a_at | Afm     | afamin                                         | 5.080 | 3.22E-05  |
| 1421855_at   | Fgl2    | fibrinogen-like protein 2                      | 5.093 | 3.28E-05  |
| 1423946_at   | Pdlim2  | PDZ and LIM domain 2                           | 5.097 | 7.30E-06  |

|              |                        |                                                                |       |           |
|--------------|------------------------|----------------------------------------------------------------|-------|-----------|
| 1457976_at   | 2010002M12<br>Rik      | RIKEN cDNA<br>2010002M12<br>gene                               | 5.137 | 3.20E-06  |
| 1436058_at   | Rsad2                  | radical S-<br>adenosyl<br>methionine<br>domain<br>containing 2 | 5.158 | 0.0003878 |
| 1448617_at   | Cd53                   | CD53 antigen                                                   | 5.166 | 4.42E-05  |
| 1454742_at   | Rasgef1b               | RasGEF domain<br>family, member<br>1B                          | 5.205 | 0.0011358 |
| 1433205_at   | 2810436B12R<br>ik      | RIKEN cDNA<br>2810436B12<br>gene                               | 5.216 | 0.0001441 |
| 1437479_x_at | Tbx3                   | T-box 3                                                        | 5.247 | 0.0002069 |
| 1435529_at   | OTTMUSG00<br>000016644 | predicted gene,<br>OTTMUSG00000<br>016644                      | 5.271 | 1.16E-05  |
| 1453080_at   | Apol7a                 | apolipoprotein L<br>7a                                         | 5.301 | 5.00E-06  |
| 1416306_at   | Clca3                  | chloride channel<br>calcium activated<br>3                     | 5.328 | 0.0011624 |
| 1430234_at   | Arl14                  | ADP-ribosylation<br>factor-like 14                             | 5.331 | 4.10E-06  |
| 1436649_at   | Ikzf3                  | IKAROS family<br>zinc finger 3                                 | 5.350 | 5.51E-05  |
| 1434372_at   | AW112010               | expressed<br>sequence<br>AW112010                              | 5.354 | 8.60E-06  |
| 1426725_s_at | Ets1                   | E26 avian<br>leukemia<br>oncogene 1,<br>5@#\$%& domain         | 5.378 | 2.90E-06  |
| 1444599_at   | Herc4                  | hect domain and<br>RLD 4                                       | 5.380 | 9.27E-05  |
| 1449248_at   | Clcn2                  | chloride channel<br>2                                          | 5.392 | 0.0005405 |
| 1420499_at   | Gch1                   | GTP<br>cyclohydrolase 1                                        | 5.396 | 7.60E-06  |
| 1418739_at   | Sgk2                   | serum/glucocortic<br>oid regulated<br>kinase 2                 | 5.416 | 2.56E-05  |



|              |         |                                                                               |       |           |
|--------------|---------|-------------------------------------------------------------------------------|-------|-----------|
| 1434316_at   | Chsy1   | chondroitin sulfate synthase 1                                                | 5.452 | 3.30E-06  |
| 1450264_a_at | Chka    | choline kinase alpha                                                          | 5.486 | 1.80E-06  |
| 1451777_at   | Ddx60   | DEAD (Asp-Glu-Ala-Asp) box polypeptide 60                                     | 5.583 | 1.53E-05  |
| 1418395_at   | Slc47a1 | solute carrier family 47, member 1                                            | 5.620 | 9.00E-06  |
| 1439348_at   | S100a10 | S100 calcium binding protein A10 (calpactin)                                  | 5.630 | 6.70E-06  |
| 1440218_at   | Pcdh24  | protocadherin 24                                                              | 5.672 | 9.10E-06  |
| 1445697_at   | NA      | NA                                                                            | 5.709 | 0.0002339 |
| 1448596_at   | Slc6a8  | solute carrier family 6 (neurotransmitter transporter, creatine), member 8    | 5.711 | 2.70E-06  |
| 1456956_at   | Ikzf2   | IKAROS family zinc finger 2                                                   | 5.736 | 3.04E-05  |
| 1426872_at   | Fcgbp   | Fc fragment of IgG binding protein                                            | 5.760 | 2.06E-05  |
| 1441818_at   | NA      | NA                                                                            | 5.784 | 1.32E-05  |
| 1460242_at   | Cd55    | CD55 antigen                                                                  | 5.793 | 1.38E-05  |
| 1418201_at   | Plekhg2 | pleckstrin homology domain containing, family G (with RhoGef domain) member 2 | 5.796 | 2.20E-06  |
| 1460550_at   | Mttr11  | myotubularin related protein 11                                               | 5.826 | 3.20E-05  |
| 1421009_at   | Rsad2   | radical S-adenosyl methionine domain containing 2                             | 5.849 | 0.0005283 |

|              |         |                                                      |       |           |
|--------------|---------|------------------------------------------------------|-------|-----------|
| 1447227_at   | NA      | NA                                                   | 5.878 | 0.0002481 |
| 1418340_at   | Fcer1g  | Fc receptor, IgE, high affinity I, gamma polypeptide | 5.936 | 0.0001193 |
| 1438301_at   | NA      | NA                                                   | 5.962 | 0.0002056 |
| 1426715_s_at | Slc46a1 | solute carrier family 46, member 1                   | 6.015 | 8.27E-05  |
| 1426047_a_at | Ptprr   | protein tyrosine phosphatase, receptor type, R       | 6.037 | 4.72E-05  |
| 1427203_at   | Myo15b  | myosin XVB                                           | 6.061 | 1.20E-06  |
| 1417761_at   | Apoa4   | apolipoprotein A-IV                                  | 6.097 | 1.87E-05  |
| 1426990_at   | Cubn    | cubilin (intrinsic factor-cobalamin receptor)        | 6.118 | 0.0025331 |
| 1453127_at   | Ppm1j   | protein phosphatase 1J                               | 6.120 | 1.17E-05  |
| 1429550_at   | Entpd8  | ectonucleoside triphosphate diphosphohydrolase 8     | 6.133 | 5.30E-06  |
| 1448605_at   | Rhoc    | ras homolog gene family, member C                    | 6.163 | 1.10E-05  |
| 1442256_at   | Prkcd   | protein kinase C, delta                              | 6.197 | 2.70E-06  |
| 1422706_at   | Pmepa1  | prostate transmembrane protein, androgen induced 1   | 6.202 | 6.84E-05  |
| 1425084_at   | Gimap7  | GTPase, IMAP family member 7                         | 6.266 | 2.06E-05  |
| 1439141_at   | Gpr18   | G protein-coupled receptor 18                        | 6.270 | 1.15E-05  |
| 1455180_at   | Gcom1   | GRINL1A complex locus                                | 6.293 | 2.10E-06  |

|              |               |                                                                         |       |           |
|--------------|---------------|-------------------------------------------------------------------------|-------|-----------|
| 1428083_at   | 2310043N10Rik | RIKEN cDNA 2310043N10 gene                                              | 6.297 | 2.00E-06  |
| 1428595_at   | Slc6a19       | solute carrier family 6 (neurotransmitter transporter), member 19       | 6.320 | 7.80E-06  |
| 1426159_x_at | Tcrb-J        | T-cell receptor beta, joining region                                    | 6.332 | 2.87E-05  |
| 1416691_at   | Gtpbp2        | GTP binding protein 2                                                   | 6.391 | 1.19E-05  |
| 1418191_at   | Usp18         | ubiquitin specific peptidase 18                                         | 6.392 | 2.52E-05  |
| 1425396_a_at | Lck           | lymphocyte protein tyrosine kinase                                      | 6.426 | 7.60E-06  |
| 1418219_at   | Il15          | interleukin 15                                                          | 6.458 | 9.00E-07  |
| 1417558_at   | Fyn           | Fyn proto-oncogene                                                      | 6.600 | 1.07E-05  |
| 1455104_at   | Mxd1          | MAX dimerization protein 1                                              | 6.674 | 2.00E-06  |
| 1452378_at   | Malat1        | metastasis associated lung adenocarcinoma transcript 1 (non-coding RNA) | 6.681 | 0.0006957 |
| 1424688_at   | Creb3l3       | cAMP responsive element binding protein 3-like 3                        | 6.720 | 1.80E-06  |
| 1450753_at   | Nkg7          | natural killer cell group 7 sequence                                    | 6.828 | 2.50E-05  |
| 1451006_at   | Xdh           | xanthine dehydrogenase                                                  | 6.864 | 1.50E-06  |
| 1418069_at   | Apoc2         | apolipoprotein C-II                                                     | 6.873 | 4.20E-06  |
| 1416246_a_at | Coro1a        | coronin, actin binding protein 1A                                       | 6.892 | 1.25E-05  |

|              |                   |                                                            |       |           |
|--------------|-------------------|------------------------------------------------------------|-------|-----------|
| 1457084_at   | Nlrp9b            | NLR family, pyrin domain containing 9B                     | 6.938 | 2.79E-05  |
| 1449235_at   | Fasl              | Fas ligand (TNF superfamily, member 6)                     | 6.942 | 5.60E-06  |
| 1419835_s_at | Plec1             | plectin 1                                                  | 6.948 | 1.50E-06  |
| 1422124_a_at | Ptprc             | protein tyrosine phosphatase, receptor type, C             | 7.032 | 1.30E-06  |
| 1428735_at   | Cd69              | CD69 antigen                                               | 7.088 | 2.00E-05  |
| 1428358_at   | 1810010M01<br>Rik | RIKEN cDNA 1810010M01 gene                                 | 7.115 | 0.0001074 |
| 1442305_at   | Gtpbp2            | GTP binding protein 2                                      | 7.183 | 6.00E-07  |
| 1448752_at   | Car2              | carbonic anhydrase 2                                       | 7.230 | 7.50E-06  |
| 1419473_a_at | Cck               | cholecystokinin                                            | 7.282 | 3.77E-05  |
| 1444458_at   | NA                | NA                                                         | 7.293 | 1.11E-05  |
| 1452837_at   | Lpin2             | lipin 2                                                    | 7.296 | 3.33E-05  |
| 1452405_x_at | A130082M07<br>Rik | RIKEN cDNA A130082M07 gene                                 | 7.347 | 1.71E-05  |
| 1426452_a_at | Rab30             | RAB30, member RAS oncogene family                          | 7.350 | 9.90E-06  |
| 1426670_at   | Agrn              | agrin                                                      | 7.352 | 1.60E-06  |
| 1417426_at   | Srgn              | serglycin                                                  | 7.433 | 3.90E-06  |
| 1430383_at   | Ceacam20          | carcinoembryonic antigen-related cell adhesion molecule 20 | 7.506 | 5.70E-06  |
| 1448964_at   | S100g             | S100 calcium binding protein G                             | 7.639 | 0.0030105 |
| 1460218_at   | Cd52              | CD52 antigen                                               | 7.702 | 3.40E-06  |
| 1417601_at   | Rgs1              | regulator of G-protein signaling 1                         | 7.738 | 2.10E-06  |

|              |                   |                                                             |        |           |
|--------------|-------------------|-------------------------------------------------------------|--------|-----------|
| 1450618_a_at | Sprr2a            | small proline-rich protein 2A                               | 7.777  | 1.77E-05  |
| 1460245_at   | Klrd1             | killer cell lectin-like receptor, subfamily D, member 1     | 7.834  | 6.00E-07  |
| 1416690_at   | Gtpbp2            | GTP binding protein 2                                       | 7.858  | 1.30E-06  |
| 1421375_a_at | S100a6            | S100 calcium binding protein A6 (calcyclin)                 | 7.932  | 4.20E-06  |
| 1448980_at   | Ghrl              | ghrelin                                                     | 8.020  | 4.00E-06  |
| 1434129_s_at | Lhfp12            | lipoma HMGIC fusion partner-like 2                          | 8.065  | 1.01E-05  |
| 1425933_a_at | Nt5c2             | 5'-\$\%&\$-nucleotidase, cytosolic II                       | 8.200  | 0.0002577 |
| 1425471_x_at | NA                | NA                                                          | 8.295  | 2.10E-06  |
| 1419231_s_at | Krt12             | keratin 12                                                  | 8.353  | 1.83E-05  |
| 1450783_at   | Ifit1             | interferon-induced protein with tetratricopeptide repeats 1 | 8.470  | 3.00E-07  |
| 1451673_at   | Cd8a              | CD8 antigen, alpha chain                                    | 9.088  | 7.90E-06  |
| 1437258_at   | 100042999         | predicted gene, 100042999                                   | 9.191  | 4.00E-06  |
| 1424339_at   | Oasl1             | 2'-\$\%&\$-5'-\$\%&\$ oligoadenylate synthetase-like 1      | 9.227  | 1.50E-06  |
| 1419524_at   | Tph1              | tryptophan hydroxylase 1                                    | 9.256  | 2.00E-07  |
| 1424375_s_at | Gimap4            | GTPase, IMAP family member 4                                | 9.597  | 4.00E-07  |
| 1449907_at   | Bcmo1             | beta-carotene 15,15'-\$\%&\$-monooxygenase                  | 9.627  | 2.00E-07  |
| 1455449_at   | 2010107G12<br>Rik | RIKEN cDNA 2010107G12 gene                                  | 10.101 | 2.60E-05  |

|              |         |                                                                         |        |          |
|--------------|---------|-------------------------------------------------------------------------|--------|----------|
| 1422189_x_at | Tcrg-V4 | T-cell receptor gamma, variable 4                                       | 10.159 | 1.20E-05 |
| 1422860_at   | Nts     | neurotensin                                                             | 10.480 | 3.50E-06 |
| 1457554_at   | Apob    | apolipoprotein B                                                        | 10.518 | 9.30E-06 |
| 1447541_s_at | Itgae   | integrin alpha E, epithelial-associated                                 | 10.521 | 3.00E-07 |
| 1444078_at   | Cd8a    | CD8 antigen, alpha chain                                                | 10.810 | 9.00E-07 |
| 1427285_s_at | Malat1  | metastasis associated lung adenocarcinoma transcript 1 (non-coding RNA) | 11.244 | 2.10E-06 |
| 1419178_at   | Cd3g    | CD3 antigen, gamma polypeptide                                          | 11.405 | 1.30E-06 |
| 1424962_at   | Tm4sf4  | transmembrane 4 superfamily member 4                                    | 11.535 | 2.50E-06 |
| 1417133_at   | Pmp22   | peripheral myelin protein 22                                            | 13.246 | 7.70E-06 |
| 1418126_at   | Ccl5    | chemokine (C-C motif) ligand 5                                          | 13.498 | 4.00E-07 |
| 1422188_s_at | Tcrg-V3 | T-cell receptor gamma, variable 3                                       | 13.774 | 1.00E-06 |
| 1417898_a_at | Gzma    | granzyme A                                                              | 17.174 | 5.00E-07 |
| 1419060_at   | Gzmb    | granzyme B                                                              | 17.395 | 2.00E-07 |
| 1450521_a_at | Tcrg-V4 | T-cell receptor gamma, variable 4                                       | 17.644 | < 1e-07  |
| 1418805_at   | Sct     | secretin                                                                | 19.003 | 1.30E-06 |
| 1428547_at   | Nt5e    | 5' nucleotidase, ecto                                                   | 29.690 | 7.00E-07 |
| 1439727_at   | Clca6   | chloride channel calcium activated 6                                    | 33.088 | 1.25E-05 |
| 1428361_x_at | Hba-a1  | hemoglobin alpha, adult chain 1                                         | 34.171 | 8.91E-05 |

|              |         |                                                                            |         |          |
|--------------|---------|----------------------------------------------------------------------------|---------|----------|
| 1417184_s_at | Hbb-b2  | hemoglobin, beta adult minor chain                                         | 35.759  | 4.56E-05 |
| 1452757_s_at | Hba-a1  | hemoglobin alpha, adult chain 1                                            | 36.954  | 9.56E-05 |
| 1420437_at   | Indo    | indoleamine-pyrrole 2,3 dioxygenase                                        | 42.339  | 1.00E-07 |
| 1427302_at   | Enpp3   | ectonucleotide pyrophosphatase/phosphodiesterase 3                         | 43.261  | < 1e-07  |
| 1417976_at   | Ada     | adenosine deaminase                                                        | 52.363  | 5.00E-07 |
| 1439260_a_at | Enpp3   | ectonucleotide pyrophosphatase/phosphodiesterase 3                         | 53.721  | 3.00E-07 |
| 1450639_at   | Slc28a2 | solute carrier family 28 (sodium-coupled nucleoside transporter), member 2 | 103.638 | 1.00E-07 |
