# Supplementary material
Source: PubMed Central journal article supplement (PMC2906237)
Supplement: NIHMS206558-supplement-6.pdf [file NIHMS206558-supplement-6.pdf]

**Apc<sup>1638N/+</sup> F1/Wild type F1**

| Probe set    | Gene symbol | Gene name                                                               | Fold change | p value   |
|--------------|-------------|-------------------------------------------------------------------------|-------------|-----------|
| 1427285_s_at | Malat1      | metastasis associated lung adenocarcinoma transcript 1 (non-coding RNA) | 0.326       | 0.007909  |
| 1452378_at   | Malat1      | metastasis associated lung adenocarcinoma transcript 1 (non-coding RNA) | 0.372       | 0.0213768 |
| 1419305_a_at | Fbxo36      | F-box protein 36                                                        | 0.376       | 0.0372347 |
| 1423510_at   | Iapp        | islet amyloid polypeptide                                               | 0.381       | 0.0024546 |
| 1437323_a_at | Iapp        | islet amyloid polypeptide                                               | 0.382       | 0.0075823 |
| 1425353_at   | Enpp3       | ectonucleotide pyrophosphatase/phosphodiesterase 3                      | 0.395       | 0.0036575 |
| 1439356_at   | Flii        | flightless I homolog (Drosophila)                                       | 0.401       | 0.0005567 |
| 1424762_at   | C1qtnf5     | C1q and tumor necrosis factor related protein 5                         | 0.402       | 0.0023121 |
| 1416842_at   | Gstm5       | glutathione S-transferase, mu 5                                         | 0.415       | 0.001833  |
| 1426188_s_at | BC005685    | cDNA sequence BC005685                                                  | 0.431       | 0.0116698 |
| 1440121_at   | NA          | NA                                                                      | 0.451       | 0.0114547 |
| 1422090_a_at | Pfkfb2      | 6-phosphofructo-2-kinase/fructose-2,6-biphosphatase 2                   | 0.459       | 0.0337043 |

|            |                   |                                                                                         |       |           |
|------------|-------------------|-----------------------------------------------------------------------------------------|-------|-----------|
| 1447507_at | C80406            | expressed<br>sequence<br>C80406                                                         | 0.460 | 0.0074519 |
| 1429060_at | Malat1            | metastasis<br>associated lung<br>adenocarcinom<br>a transcript 1<br>(non-coding<br>RNA) | 0.462 | 0.0253581 |
| 1451257_at | Acsl6             | acyl-CoA<br>synthetase long<br>chain family<br>member 6                                 | 0.470 | 0.0092655 |
| 1430564_at | Mobk1a            | MOB1, Mps<br>One Binder<br>kinase activator<br>like 1A (yeast)                          | 0.470 | 0.0181219 |
| 1442963_at | Plcg1             | phospholipase<br>C, gamma 1                                                             | 0.476 | 0.0034561 |
| 1444177_at | EG626058          | predicted gene,<br>EG626058                                                             | 0.485 | 0.0093066 |
| 1460225_at | Mrp63             | mitochondrial<br>ribosomal<br>protein 63                                                | 0.491 | 0.0243355 |
| 1455449_at | 2010107G12<br>Rik | RIKEN cDNA<br>2010107G12<br>gene                                                        | 0.493 | 0.0208338 |
| 1439671_at | 4930466K18<br>Rik | RIKEN cDNA<br>4930466K18<br>gene                                                        | 0.495 | 0.0197063 |
| 1440447_at | Abhd2             | abhydrolase<br>domain<br>containing 2                                                   | 0.495 | 0.0246555 |
| 1460123_at | Gpr1              | G protein-<br>coupled<br>receptor 1                                                     | 0.496 | 0.0429354 |
| 1427303_at | Enpp3             | ectonucleotide<br>pyrophosphata<br>se/phosphodie<br>sterase 3                           | 0.496 | 0.0355148 |
| 1423246_at | Txndc4            | thioredoxin<br>domain<br>containing 4<br>(endoplasmic<br>reticulum)                     | 2.012 | 0.0124082 |
| 1441102_at | Prlr              | prolactin<br>receptor                                                                   | 2.013 | 0.0089659 |

|              |                   |                                                                                           |       |           |
|--------------|-------------------|-------------------------------------------------------------------------------------------|-------|-----------|
| 1435577_at   | Dab1              | disabled homolog 1 (Drosophila)                                                           | 2.014 | 0.0350733 |
| 1421817_at   | Gsr               | glutathione reductase                                                                     | 2.024 | 0.0172203 |
| 1435534_a_at | OTTMUSG0000016825 | predicted gene, OTTMUSG0000016825                                                         | 2.062 | 0.0042165 |
| 1433428_x_at | Tgm2              | transglutaminase 2, C polypeptide                                                         | 2.066 | 0.0293921 |
| 1418165_at   | Itln1             | intelectin 1 (galactofuranose binding)                                                    | 2.089 | 0.0157458 |
| 1452270_s_at | Cubn              | cubilin (intrinsic factor-cobalamin receptor)                                             | 2.092 | 0.0098015 |
| 1436808_x_at | Mcm5              | minichromosome maintenance deficient 5, cell division cycle 46 (S. cerevisiae)            | 2.096 | 0.0013585 |
| 1418460_at   | Sh3d19            | SH3 domain protein D19                                                                    | 2.105 | 0.0077616 |
| 1448678_at   | 3110048E14 Rik    | RIKEN cDNA 3110048E14 gene                                                                | 2.113 | 0.0057713 |
| 1437671_x_at | Prss23            | protease, serine, 23                                                                      | 2.118 | 0.0265735 |
| 1435945_a_at | Kcnn4             | potassium intermediate/small conductance calcium-activated channel, subfamily N, member 4 | 2.128 | 0.0089887 |
| 1452592_at   | Mgst2             | microsomal glutathione S-transferase 2                                                    | 2.132 | 0.0359034 |
| 1416700_at   | Rnd3              | Rho family GTPase 3                                                                       | 2.149 | 0.0038941 |
| 1436707_x_at | Ncaph             | non-SMC condensin I complex, subunit H                                                    | 2.165 | 0.0032122 |
| 1435917_at   | Ociad2            | OClA domain containing 2                                                                  | 2.170 | 0.0055035 |
| 1439426_x_at | Lyz2              | lysozyme 2                                                                                | 2.178 | 0.0241056 |

|              |          |                                                                          |       |           |
|--------------|----------|--------------------------------------------------------------------------|-------|-----------|
| 1434592_at   | Slc16a10 | solute carrier family 16 (monocarboxylic acid transporters), member 10   | 2.187 | 0.0166976 |
| 1417750_a_at | Slc25a37 | solute carrier family 25, member 37                                      | 2.189 | 0.0147091 |
| 1460259_s_at | Clca2    | chloride channel calcium activated 2                                     | 2.206 | 0.0146864 |
| 1437277_x_at | Tgm2     | transglutaminase 2, C polypeptide                                        | 2.222 | 0.0136915 |
| 1418486_at   | Vnn1     | vanin 1                                                                  | 2.223 | 0.0093974 |
| 1454842_a_at | B3galnt2 | UDP-GalNAc:betaGlucNAc beta 1,3-galactosaminyltransferase, polypeptide 2 | 2.254 | 0.0147867 |
| 1448780_at   | Slc12a2  | solute carrier family 12, member 2                                       | 2.305 | 0.0127557 |
| 1447845_s_at | Vnn1     | vanin 1                                                                  | 2.311 | 0.00291   |
| 1457068_at   | Naalad1  | N-acetylated alpha-linked acidic dipeptidase-like 1                      | 2.344 | 0.001928  |
| 1427473_at   | Gstm3    | glutathione S-transferase, mu 3                                          | 2.392 | 0.0318709 |
| 1451177_at   | Dnajb4   | DnaJ (Hsp40) homolog, subfamily B, member 4                              | 2.423 | 0.0047777 |
| 1452095_a_at | H47      | histocompatibility 47                                                    | 2.424 | 0.0022761 |
| 1435370_a_at | Ces3     | carboxylesterase 3                                                       | 2.578 | 0.0187813 |
| 1455900_x_at | Tgm2     | transglutaminase 2, C polypeptide                                        | 2.753 | 0.0100159 |
| 1425606_at   | Slc5a8   | solute carrier family 5 (iodide transporter), member 8                   | 2.772 | 0.0108431 |

|              |          |                                                      |       |           |
|--------------|----------|------------------------------------------------------|-------|-----------|
| 1418287_a_at | Dmbt1    | deleted in malignant brain tumors 1                  | 2.781 | 0.0173216 |
| 1419498_at   | Tmigd1   | transmembrane and immunoglobulin domain containing 1 | 2.814 | 0.0003521 |
| 1421840_at   | Abca1    | ATP-binding cassette, sub-family A (ABC1), member 1  | 2.818 | 0.0086203 |
| 1436543_at   | Gtpbp10  | GTP-binding protein 10 (putative)                    | 2.897 | 0.0004548 |
| 1424265_at   | Npl      | N-acetylneuraminase pyruvate lyase                   | 3.006 | 0.0002571 |
| 1452614_at   | Bcl2l15  | BCL2-like 15                                         | 3.087 | 0.0003777 |
| 1448290_at   | Reg3b    | regenerating islet-derived 3 beta                    | 3.283 | 0.0035481 |
| 1450682_at   | Fabp6    | fatty acid binding protein 6, ileal (gastrotropin)   | 3.596 | 0.0137085 |
| 1424266_s_at | AU018778 | expressed sequence AU018778                          | 3.817 | 0.0038629 |
| 1416297_s_at | Reg3b    | regenerating islet-derived 3 beta                    | 4.284 | 0.0042727 |
| 1450709_at   | Defcr5   | defensin related cryptdin 5                          | 5.443 | 0.0217733 |
| 1427127_x_at | Hspa1b   | heat shock protein 1B                                | 5.490 | 0.000356  |
| 1452318_a_at | Hspa1b   | heat shock protein 1B                                | 5.640 | 0.0001698 |
| 1448872_at   | Reg3g    | regenerating islet-derived 3 gamma                   | 5.881 | 0.0021178 |
| 1427126_at   | Hspa1b   | heat shock protein 1B                                | 6.366 | 0.0004214 |
| 1452388_at   | Hspa1a   | heat shock protein 1A                                | 7.155 | 5.14E-05  |
