# Supplementary material
Source: PubMed Central journal article supplement (PMC2906237)
Supplement: NIHMS206558-supplement-7.pdf [file NIHMS206558-supplement-7.pdf]

## Apc<sup>1638N/+</sup> F10/Wild type F10

| Probe set    | Gene symbol   | Gene name                                              | Fold change | p value   |
|--------------|---------------|--------------------------------------------------------|-------------|-----------|
| 1459747_at   | NA            | NA                                                     | 0.361       | 0.0272683 |
| 1435872_at   | NA            | NA                                                     | 0.371       | 0.0143635 |
| 1426715_s_at | Slc46a1       | solute carrier family 46, member 1                     | 0.393       | 0.0370555 |
| 1417898_a_at | Gzma          | granzyme A                                             | 0.395       | 0.0330584 |
| 1440218_at   | Pcdh24        | protocadherin 24                                       | 0.400       | 0.0185226 |
| 1444258_at   | NA            | NA                                                     | 0.402       | 0.0282398 |
| 1418015_at   | Pum2          | pumilio 2 (Drosophila)                                 | 0.403       | 0.0453897 |
| 1448683_at   | Cyp2d26       | cytochrome P450, family 2, subfamily d, polypeptide 26 | 0.405       | 0.0316206 |
| 1422453_at   | Prpf8         | pre-mRNA processing factor 8                           | 0.411       | 0.0156287 |
| 1451139_at   | Slc39a4       | solute carrier family 39 (zinc transporter), member 4  | 0.411       | 0.0019328 |
| 1425079_at   | Tm6sf2        | transmembrane 6 superfamily member 2                   | 0.421       | 0.0316473 |
| 1437669_x_at | Ccr1          | chemokine (C-C motif) receptor-like 1                  | 0.435       | 0.0448629 |
| 1451683_x_at | H2-K1         | histocompatibility 2, K1, K region                     | 0.435       | 0.0413122 |
| 1455889_at   | Far2          | fatty acyl CoA reductase 2                             | 0.438       | 0.037102  |
| 1424715_at   | Retsat        | retinol saturase (all trans retinol 13,14 reductase)   | 0.438       | 0.0163892 |
| 1418331_at   | 1110031I02Rik | RIKEN cDNA 1110031I02 gene                             | 0.446       | 0.0216148 |
| 1420426_at   | Myo7b         | myosin VIIb                                            | 0.446       | 0.0256166 |

|              |          |                                                                                                                                             |       |           |
|--------------|----------|---------------------------------------------------------------------------------------------------------------------------------------------|-------|-----------|
| 1452150_at   | AU040320 | expressed<br>sequence<br>AU040320                                                                                                           | 0.446 | 0.0124992 |
| 1426014_a_at | Mupcdh   | mucin-like<br>protocadherin                                                                                                                 | 0.446 | 0.036641  |
| 1443341_at   | NA       | NA                                                                                                                                          | 0.448 | 0.0116822 |
| 1438714_at   | NA       | NA                                                                                                                                          | 0.450 | 0.0074319 |
| 1416759_at   | Mical1   | microtubule<br>associated<br>monooxygenase<br>, calponin and<br>LIM domain<br>containing 1                                                  | 0.451 | 0.0180164 |
| 1417601_at   | Rgs1     | regulator of G-<br>protein<br>signaling 1                                                                                                   | 0.452 | 0.0492094 |
| 1418646_at   | Gna-rs1  | guanine<br>nucleotide<br>binding<br>protein, related<br>sequence 1                                                                          | 0.455 | 0.0236889 |
| 1427294_a_at | Slc38a10 | solute carrier<br>family 38,<br>member 10                                                                                                   | 0.458 | 0.0446729 |
| 1448110_at   | Sema4a   | sema domain,<br>immunoglobulin<br>domain (Ig),<br>transmembrane<br>domain (TM)<br>and short<br>cytoplasmic<br>domain,<br>(semaphorin)<br>4A | 0.462 | 0.0183148 |
| 1417920_at   | Amn      | amionless                                                                                                                                   | 0.462 | 0.0339486 |
| 1417042_at   | Slc37a4  | solute carrier<br>family 37<br>(glucose-6-<br>phosphate<br>transporter),<br>member 4                                                        | 0.464 | 0.0220935 |
| 1430527_a_at | Rnf167   | ring finger<br>protein 167                                                                                                                  | 0.464 | 0.0131824 |
| 1456849_at   | NA       | NA                                                                                                                                          | 0.465 | 0.0152178 |
| 1460170_at   | Ext2     | exostoses<br>(multiple) 2                                                                                                                   | 0.467 | 0.0106283 |

|              |          |                                                                                                                  |       |           |
|--------------|----------|------------------------------------------------------------------------------------------------------------------|-------|-----------|
| 1417440_at   | Arid1a   | AT rich interactive domain 1A (SWI-like)                                                                         | 0.468 | 0.0464827 |
| 1417868_a_at | Ctsz     | cathepsin Z                                                                                                      | 0.468 | 0.0370989 |
| 1448402_at   | Tln1     | talin 1                                                                                                          | 0.469 | 0.0499263 |
| 1424456_at   | Pvrl2    | poliovirus receptor-related 2                                                                                    | 0.469 | 0.0374555 |
| 1448148_at   | Grn      | granulin                                                                                                         | 0.474 | 0.0341025 |
| 1427889_at   | Spna2    | spectrin alpha 2                                                                                                 | 0.476 | 0.0127787 |
| 1440819_s_at | BC059842 | cDNA sequence BC059842                                                                                           | 0.477 | 0.0173178 |
| 1448128_at   | Ctsa     | cathepsin A                                                                                                      | 0.481 | 0.025811  |
| 1454658_at   | Ilvbl    | ilvB (bacterial acetolactate synthase)-like                                                                      | 0.484 | 0.0251278 |
| 1425545_x_at | H2-L     | histocompatibility 2, D region                                                                                   | 0.485 | 0.0266003 |
| 1420843_at   | Ptpnf    | protein tyrosine phosphatase, receptor type, F                                                                   | 0.486 | 0.0244289 |
| 1430043_at   | Ttc19    | tetratricopeptide repeat domain 19                                                                               | 0.486 | 0.0117217 |
| 1417108_at   | Klc4     | kinesin light chain 4                                                                                            | 0.486 | 0.0214801 |
| 1451931_x_at | H2-L     | histocompatibility 2, D region                                                                                   | 0.488 | 0.0215466 |
| 1416683_at   | Plxnb2   | plexin B2                                                                                                        | 0.489 | 0.0109914 |
| 1416275_at   | Slc26a6  | solute carrier family 26, member 6                                                                               | 0.489 | 0.0318773 |
| 1449202_at   | Sema4g   | sema domain, immunoglobulin domain (Ig), transmembrane domain (TM) and short cytoplasmic domain, (semaphorin) 4G | 0.490 | 0.0451329 |

|                |               |                                                                                    |       |           |
|----------------|---------------|------------------------------------------------------------------------------------|-------|-----------|
| 1434586_a_at   | Ptdss2        | phosphatidylserine synthase 2                                                      | 0.491 | 0.026475  |
| 1456610_at     | Jmjd3         | jumonji domain containing 3                                                        | 0.492 | 0.0411598 |
| 1416769_s_at   | Atp6v0b       | ATPase, H <sup>+</sup> transporting, lysosomal V0 subunit B                        | 0.497 | 0.0196648 |
| 1438266_at     | Adamts15      | ADAMTS-like 5                                                                      | 0.498 | 0.0267019 |
| 1424238_at     | Sirt7         | sirtuin 7 (silent mating type information regulation 2, homolog) 7 (S. cerevisiae) | 0.499 | 0.0162015 |
| 1459860_x_at   | Trim2         | tripartite motif-containing 2                                                      | 2.001 | 0.0141431 |
| 1452388_at     | Hspa1a        | heat shock protein 1A                                                              | 2.004 | 0.0236075 |
| AFFX-BioB-3_at | NA            | NA                                                                                 | 2.008 | 0.0454378 |
| 1446483_at     | Akr1e1        | aldo-keto reductase family 1, member E1                                            | 2.009 | 0.0484743 |
| 1460302_at     | Thbs1         | thrombospondin 1                                                                   | 2.009 | 0.0169981 |
| 1437249_at     | Skap1         | src family associated phosphoprotein 1                                             | 2.012 | 0.0188387 |
| 1423836_at     | Zfp503        | zinc finger protein 503                                                            | 2.014 | 0.01207   |
| 1426327_s_at   | Zfp91         | zinc finger protein 91                                                             | 2.015 | 0.0153741 |
| 1448290_at     | Reg3b         | regenerating islet-derived 3 beta                                                  | 2.016 | 0.0166414 |
| 1447739_x_at   | Klhd4         | kelch domain containing 4                                                          | 2.017 | 0.028739  |
| 1438659_x_at   | Chchd6        | coiled-coil-helix coiled-coil-helix domain containing 6                            | 2.020 | 0.0281448 |
| 1430680_a_at   | 5830417110Rik | RIKEN cDNA 5830417110 gene                                                         | 2.024 | 0.048529  |

|                   |                |                                                                                      |       |           |
|-------------------|----------------|--------------------------------------------------------------------------------------|-------|-----------|
| 1453928_a_at      | Ssb            | Sjogren syndrome antigen B                                                           | 2.025 | 0.0361339 |
| 1428916_s_at      | Sirt5          | sirtuin 5 (silent mating type information regulation 2 homolog) 5 (S. cerevisiae)    | 2.027 | 0.009676  |
| 1447060_at        | NA             | NA                                                                                   | 2.033 | 0.026877  |
| AFFX-MURINE_b1_at | NA             | NA                                                                                   | 2.035 | 0.0253516 |
| 1420994_at        | B3gnt5         | UDP-GlcNAc:betaGal beta-1,3-N-acetylglucosaminyltransferase 5                        | 2.040 | 0.021133  |
| 1424217_at        | Papola         | poly (A) polymerase alpha                                                            | 2.046 | 0.0128153 |
| 1426407_at        | Cugbp1         | CUG triplet repeat, RNA binding protein 1                                            | 2.053 | 0.0332755 |
| 1440770_at        | Bcl2           | B-cell leukemia/lymphoma 2                                                           | 2.057 | 0.0179207 |
| 1444028_s_at      | Dock9          | dedicator of cytokinesis 9                                                           | 2.057 | 0.0066224 |
| 1448505_at        | C1d            | nuclear DNA binding protein                                                          | 2.062 | 0.0272645 |
| 1450618_a_at      | Sprr2a         | small proline-rich protein 2A                                                        | 2.062 | 0.0487749 |
| 1437104_at        | Arfgef1        | ADP-ribosylation factor guanine nucleotide-exchange factor 1 (brefeldin A-inhibited) | 2.067 | 0.0399663 |
| 1439200_x_at      | Erdr1          | erythroid differentiation regulator 1                                                | 2.067 | 0.0053515 |
| 1451456_at        | 6430706D22 Rik | RIKEN cDNA 6430706D22 gene                                                           | 2.071 | 0.0052352 |

|              |                  |                                                                                                                           |       |           |
|--------------|------------------|---------------------------------------------------------------------------------------------------------------------------|-------|-----------|
| 1457150_at   | AI428301         | expressed<br>sequence<br>AI428301                                                                                         | 2.073 | 0.0118897 |
| 1415784_at   | Vps35            | vacuolar<br>protein sorting<br>35                                                                                         | 2.077 | 0.0462366 |
| 1438573_at   | Rmi1             | RMI1, RecQ<br>mediated<br>genome<br>instability 1,<br>homolog (S.<br>cerevisiae)                                          | 2.087 | 0.0061015 |
| 1434111_at   | LOC1000480<br>50 | similar to<br>calcium-<br>independent<br>alpha-<br>latrotoxin<br>receptor<br>homolog 2                                    | 2.087 | 0.0375112 |
| 1459704_at   | NA               | NA                                                                                                                        | 2.087 | 0.0197827 |
| 1447696_x_at | Adcy5            | adenylate<br>cyclase 5                                                                                                    | 2.087 | 0.0236629 |
| 1439158_at   | Tlk1             | tousled-like<br>kinase 1                                                                                                  | 2.092 | 0.0034561 |
| 1456489_at   | Pcf11            | cleavage and<br>polyadenylatio<br>n factor<br>subunit<br>homolog (S.<br>cerevisiae)                                       | 2.094 | 0.0169975 |
| 1456717_at   | NA               | NA                                                                                                                        | 2.095 | 0.024805  |
| 1447838_x_at | Eml4             | echinoderm<br>microtubule<br>associated<br>protein like 4                                                                 | 2.095 | 0.0115038 |
| 1420017_at   | Tspan8           | tetraspanin 8                                                                                                             | 2.098 | 0.0298278 |
| 1440578_at   | NA               | NA                                                                                                                        | 2.099 | 0.0110016 |
| 1440452_at   | Drp2             | dystrophin<br>related protein<br>2                                                                                        | 2.121 | 0.0075073 |
| 1435856_x_at | Smrcb1           | SWI/SNF<br>related, matrix<br>associated,<br>actin<br>dependent<br>regulator of<br>chromatin,<br>subfamily b,<br>member 1 | 2.128 | 0.0084636 |
| 1429003_at   | Snw1             | SNW domain<br>containing 1                                                                                                | 2.134 | 0.0356522 |

|              |                   |                                                                        |       |           |
|--------------|-------------------|------------------------------------------------------------------------|-------|-----------|
| 1456544_at   | Tmem38b           | transmembrane protein 38B                                              | 2.137 | 0.0063218 |
| 1452054_at   | Ube2w             | ubiquitin-conjugating enzyme E2W (putative)                            | 2.140 | 0.015785  |
| 1434820_s_at | Pkig              | protein kinase inhibitor, gamma                                        | 2.141 | 0.0333066 |
| 1429129_at   | Lrrcc1            | leucine rich repeat and coiled-coil domain containing 1                | 2.150 | 0.0199902 |
| 1455284_x_at | Pigx              | phosphatidylinositol glycan anchor biosynthesis, class X               | 2.155 | 0.0197582 |
| 1458661_at   | NA                | NA                                                                     | 2.156 | 0.0124228 |
| 1425565_at   | Rest              | RE1-silencing transcription factor                                     | 2.161 | 0.0265607 |
| 1432651_at   | 2510019K15<br>Rik | RIKEN cDNA 2510019K15 gene                                             | 2.162 | 0.0131418 |
| 1425862_a_at | Pik3c2a           | phosphatidylinositol 3-kinase, C2 domain containing, alpha polypeptide | 2.164 | 0.0054893 |
| 1457964_at   | 1810044D09<br>Rik | RIKEN cDNA 1810044D09 gene                                             | 2.167 | 0.0048916 |
| 1438476_a_at | Chd4              | chromodomain helicase DNA binding protein 4                            | 2.169 | 0.0088546 |
| 1447993_a_at | Snhg10            | small nucleolar RNA host gene (non-protein coding) 10                  | 2.171 | 0.0144216 |

|              |                   |                                                           |       |           |
|--------------|-------------------|-----------------------------------------------------------|-------|-----------|
| 1422005_at   | Eif2ak2           | eukaryotic translation initiation factor 2-alpha kinase 2 | 2.172 | 0.0118289 |
| 1435520_at   | Msi2              | Musashi homolog 2 (Drosophila)                            | 2.173 | 0.002094  |
| 1457281_at   | Dnajc21           | DnaJ (Hsp40) homolog, subfamily C, member 21              | 2.181 | 0.024693  |
| 1455648_at   | NA                | NA                                                        | 2.181 | 0.0218464 |
| 1427169_at   | Pard3b            | par-3 partitioning defective 3 homolog B (C. elegans)     | 2.184 | 0.0370099 |
| 1444574_at   | NA                | NA                                                        | 2.185 | 0.0471522 |
| 1455998_at   | LOC667118         | similar to Zinc finger BED domain containing protein 4    | 2.186 | 0.0495609 |
| 1416568_a_at | Acin1             | apoptotic chromatin condensation inducer 1                | 2.187 | 0.0326437 |
| 1435137_s_at | 1200016E24<br>Rik | RIKEN cDNA 1200016E24 gene                                | 2.190 | 0.0262621 |
| 1440205_at   | NA                | NA                                                        | 2.198 | 0.0237797 |
| 1428670_at   | 2610305J24<br>Rik | RIKEN cDNA 2610305J24 gene                                | 2.211 | 0.0200956 |
| 1435324_x_at | Hmgb1             | high mobility group box 1                                 | 2.219 | 0.0310795 |
| 1430698_a_at | Pibf1             | progesterone immunomodulatory binding factor 1            | 2.223 | 0.0253615 |
| 1452466_a_at | Rbm6              | RNA binding motif protein 6                               | 2.227 | 0.0336777 |
| 1447908_x_at | Ttc3              | tetratricopeptide repeat domain 3                         | 2.233 | 0.0060107 |



|                     |                |                                                             |       |           |
|---------------------|----------------|-------------------------------------------------------------|-------|-----------|
| 1441089_at          | Eif2c3         | eukaryotic translation initiation factor 2C, 3              | 2.237 | 0.0091414 |
| 1440928_at          | D630037F22 Rik | RIKEN cDNA D630037F22 gene                                  | 2.246 | 0.0270085 |
| AFFX-r2-Bs-dap-3_at | NA             | NA                                                          | 2.251 | 0.0257328 |
| 1437264_at          | BC051142       | cDNA sequence BC051142                                      | 2.263 | 0.0149527 |
| 1437267_x_at        | Hnrnp1         | heterogeneous nuclear ribonucleoprotein H1                  | 2.265 | 0.0017498 |
| 1429434_at          | Pik3ca         | phosphatidylinositol 3-kinase, catalytic, alpha polypeptide | 2.274 | 0.0127718 |
| 1437745_at          | Chd7           | chromodomain helicase DNA binding protein 7                 | 2.280 | 0.0431018 |
| 1417736_at          | Smc6           | structural maintenance of chromosomes 6                     | 2.286 | 0.0086159 |
| 1443792_at          | Tsga14         | testis specific gene A14                                    | 2.295 | 0.0167923 |
| 1435493_at          | Dsp            | desmoplakin                                                 | 2.296 | 0.0320716 |
| 1430561_at          | Dnajb14        | DnaJ (Hsp40) homolog, subfamily B, member 14                | 2.300 | 0.0384125 |
| 1439828_at          | NA             | NA                                                          | 2.314 | 0.0217005 |
| 1431804_a_at        | Sp3            | trans-acting transcription factor 3                         | 2.322 | 0.0408457 |
| AFFX-DapX-3_at      | NA             | NA                                                          | 2.323 | 0.0401573 |
| 1452318_a_at        | Hspa1b         | heat shock protein 1B                                       | 2.325 | 0.0024122 |
| 1420935_a_at        | Srrm1          | serine/arginine repetitive matrix 1                         | 2.330 | 0.017146  |
| 1457348_at          | NA             | NA                                                          | 2.331 | 0.0221526 |

|                      |                   |                                                                        |       |           |
|----------------------|-------------------|------------------------------------------------------------------------|-------|-----------|
| 1436936_s_at         | Tsix              | X (inactive)-specific transcript, antisense                            | 2.334 | 0.0110941 |
| 1431889_x_at         | Psg21             | pregnancy-specific glycoprotein 21                                     | 2.336 | 0.0022268 |
| 1456506_at           | Prpf38b           | PRP38 pre-mRNA processing factor 38 (yeast) domain containing B        | 2.360 | 0.026501  |
| 1453421_at           | Srr               | serine racemase                                                        | 2.365 | 0.0062646 |
| 1427488_a_at         | Birc6             | baculoviral IAP repeat-containing 6                                    | 2.373 | 0.0337884 |
| 1425523_at           | Rbm25             | RNA binding motif protein 25                                           | 2.380 | 0.031179  |
| 1428045_a_at         | Elf2              | E74-like factor 2                                                      | 2.408 | 0.0465537 |
| 1450051_at           | Atrx              | alpha thalassemia/mental retardation syndrome X-linked homolog (human) | 2.409 | 0.0209497 |
| 1419092_a_at         | Slk               | STE20-like kinase (yeast)                                              | 2.413 | 0.0018268 |
| 1433383_at           | 1500002K03<br>Rik | RIKEN cDNA 1500002K03 gene                                             | 2.432 | 0.0304745 |
| 1430820_a_at         | Bbx               | bobby sox homolog (Drosophila)                                         | 2.436 | 0.0069515 |
| 1438771_at           | Brd1              | bromodomain containing 1                                               | 2.454 | 0.0112815 |
| AFFX-r2-Ec-bioC-3_at | NA                | NA                                                                     | 2.464 | 0.0210453 |
| 1448820_a_at         | Eif2s2            | eukaryotic translation initiation factor 2, subunit 2 (beta)           | 2.470 | 0.0027369 |

|              |            |                                                                    |       |           |
|--------------|------------|--------------------------------------------------------------------|-------|-----------|
| 1420098_s_at | D13Ert787e | DNA segment, Chr 13, ERATO Doi 787, expressed                      | 2.476 | 0.0121903 |
| 1429196_at   | Rabgap1l   | RAB GTPase activating protein 1-like                               | 2.479 | 0.0212252 |
| 1448008_at   | Ankhd1     | ankyrin repeat and KH domain containing 1                          | 2.511 | 0.0056297 |
| 1426936_at   | LOC215866  | hypothetical protein LOC215866                                     | 2.513 | 0.0062722 |
| 1428463_a_at | Ppp2r5e    | protein phosphatase 2, regulatory subunit B (B56), epsilon isoform | 2.528 | 0.0262376 |
| 1440146_at   | Vps13a     | vacuolar protein sorting 13A (yeast)                               | 2.535 | 0.003624  |
| 1423390_at   | Siah1a     | seven in absentia 1A                                               | 2.543 | 0.0098655 |
| 1448794_s_at | Dnajc2     | DnaJ (Hsp40) homolog, subfamily C, member 2                        | 2.547 | 0.0310338 |
| 1447059_at   | NA         | NA                                                                 | 2.567 | 0.0152638 |
| 1440972_at   | Nsd1       | nuclear receptor-binding SET-domain protein 1                      | 2.575 | 0.0277813 |
| 1440929_at   | Ggnbp2     | gametogenetin binding protein 2                                    | 2.577 | 0.0156559 |
| 1456493_at   | MGC118608  | similar to Sp110 nuclear body protein                              | 2.588 | 0.0206351 |
| 1455831_at   | Fus        | fusion, derived from t(12;16) malignant liposarcoma (human)        | 2.594 | 0.0350183 |
| 1438556_a_at | Tmod3      | tropomodulin 3                                                     | 2.597 | 0.046144  |

|                      |                   |                                                                          |       |           |
|----------------------|-------------------|--------------------------------------------------------------------------|-------|-----------|
| AFFX-r2-Ec-bioC-5_at | NA                | NA                                                                       | 2.632 | 0.0165195 |
| 1418024_at           | Narg1             | NMDA receptor-regulated gene 1                                           | 2.636 | 0.0449654 |
| 1439450_x_at         | A230046K03<br>Rik | RIKEN cDNA A230046K03 gene                                               | 2.646 | 0.0214322 |
| 1455151_at           | Akap9             | A kinase (PRKA) anchor protein (yotiao) 9                                | 2.650 | 0.0490794 |
| 1439114_at           | Ddx60             | DEAD (Asp-Glu-Ala-Asp) box polypeptide 60                                | 2.651 | 0.0112689 |
| 1428563_at           | Ddx10             | DEAD (Asp-Glu-Ala-Asp) box polypeptide 10                                | 2.674 | 0.0147241 |
| 1420479_a_at         | Nap111            | nucleosome assembly protein 1-like 1                                     | 2.680 | 0.0208863 |
| 1425319_s_at         | 6530403A03<br>Rik | RIKEN cDNA 6530403A03 gene                                               | 2.690 | 0.0358225 |
| AFFX-BioC-3_at       | NA                | NA                                                                       | 2.695 | 0.0129799 |
| 1449292_at           | Rb1cc1            | RB1-inducible coiled-coil 1                                              | 2.696 | 0.0481605 |
| 1425177_at           | Shmt1             | serine hydroxymethyltransferase 1 (soluble)                              | 2.700 | 0.008003  |
| 1437497_a_at         | Hsp90aa1          | heat shock protein 90, alpha (cytosolic), class A member 1               | 2.712 | 0.0386227 |
| 1423597_at           | Atp8a1            | ATPase, aminophospholipid transporter (APLT), class I, type 8A, member 1 | 2.718 | 0.0426415 |

|                |                   |                                                                        |       |           |
|----------------|-------------------|------------------------------------------------------------------------|-------|-----------|
| 1430987_s_at   | Wbp11             | WW domain binding protein 11                                           | 2.723 | 0.0041309 |
| 1448007_at     | Baz2b             | bromodomain adjacent to zinc finger domain, 2B                         | 2.725 | 0.0204969 |
| 1418431_at     | Kif5b             | kinesin family member 5B                                               | 2.728 | 0.0336933 |
| 1437719_x_at   | A230046K03<br>Rik | RIKEN cDNA A230046K03 gene                                             | 2.744 | 0.0148144 |
| 1429624_at     | Sltm              | SAFB-like, transcription modulator                                     | 2.745 | 0.0212925 |
| AFFX-BioC-5_at | NA                | NA                                                                     | 2.747 | 0.0133444 |
| 1442038_at     | Rbm26             | RNA binding motif protein 26                                           | 2.760 | 0.0310236 |
| 1449042_at     | Ctcf              | CCCTC-binding factor                                                   | 2.767 | 0.0256688 |
| 1417135_at     | Srpk2             | serine/arginine-rich protein specific kinase 2                         | 2.768 | 0.0154087 |
| 1456112_at     | Tpr               | translocated promoter region                                           | 2.775 | 0.0389852 |
| 1420947_at     | Atrx              | alpha thalassemia/mental retardation syndrome X-linked homolog (human) | 2.778 | 0.0482306 |
| 1451640_a_at   | Rsrc2             | arginine/serine-rich coiled-coil 2                                     | 2.778 | 0.0255843 |
| 1417713_at     | Eif2s2            | eukaryotic translation initiation factor 2, subunit 2 (beta)           | 2.796 | 0.0027185 |
| 1428951_at     | Nol8              | nucleolar protein 8                                                    | 2.799 | 0.0297925 |
| 1441858_at     | NA                | NA                                                                     | 2.802 | 0.0098663 |
| 1437110_at     | 2810474O19<br>Rik | RIKEN cDNA 2810474O19 gene                                             | 2.807 | 0.0431039 |

|                     |                   |                                                |       |           |
|---------------------|-------------------|------------------------------------------------|-------|-----------|
| 1427311_at          | Bptf              | bromodomain PHD finger transcription factor    | 2.828 | 0.0140271 |
| 1437884_at          | Arl5b             | ADP-ribosylation factor-like 5B                | 2.851 | 0.0023361 |
| 1427209_at          | Baz2a             | bromodomain adjacent to zinc finger domain, 2A | 2.888 | 0.0054918 |
| 1424084_at          | Rod1              | ROD1 regulator of differentiation 1 (S. pombe) | 2.897 | 0.0126927 |
| 1436741_at          | Obox5             | oocyte specific homeobox 5                     | 2.926 | 0.0007592 |
| 1445843_at          | Chd2              | chromodomain helicase DNA binding protein 2    | 2.945 | 0.0116082 |
| 1455869_at          | NA                | NA                                             | 2.945 | 0.0431005 |
| 1428497_at          | Secisbp2          | SECIS binding protein 2                        | 2.946 | 0.037313  |
| AFFX-DapX-M_at      | NA                | NA                                             | 2.959 | 0.0091759 |
| 1453185_at          | Sfrs18            | splicing factor, arginine/serine-rich 18       | 3.008 | 0.0145777 |
| 1428942_at          | Mt2               | metallothionein 2                              | 3.024 | 0.0164553 |
| AFFX-LysX-M_at      | NA                | NA                                             | 3.040 | 0.0445343 |
| 1439566_at          | Gprin3            | GPRIN family member 3                          | 3.055 | 0.0477696 |
| 1429537_at          | Sfrs18            | splicing factor, arginine/serine-rich 18       | 3.061 | 0.0066532 |
| 1437303_at          | Il6st             | interleukin 6 signal transducer                | 3.074 | 0.0069616 |
| 1426892_at          | Utrn              | utrophin                                       | 3.084 | 0.0421969 |
| AFFX-ThrX-M_at      | NA                | NA                                             | 3.108 | 0.038525  |
| 1438833_at          | Casc5             | cancer susceptibility candidate 5              | 3.118 | 0.0058852 |
| AFFX-r2-Bs-dap-M_at | NA                | NA                                             | 3.145 | 0.0041621 |
| 1432962_at          | 2610024D14<br>Rik | RIKEN cDNA 2610024D14 gene                     | 3.149 | 0.0357865 |

|                       |                |                                                                                          |       |           |
|-----------------------|----------------|------------------------------------------------------------------------------------------|-------|-----------|
| AFFX-r2-Bs-thr-M_s_at | NA             | NA                                                                                       | 3.151 | 0.0319428 |
| 1416218_x_at          | Rpl37a         | ribosomal protein L37a                                                                   | 3.159 | 0.0047882 |
| 1459565_at            | Uty            | ubiquitously transcribed tetratricopeptide repeat gene, Y chromosome                     | 3.164 | 0.0058317 |
| 1439463_x_at          | 2810416G20 Rik | RIKEN cDNA 2810416G20 gene                                                               | 3.239 | 0.0075146 |
| 1439058_at            | Sfpq           | splicing factor proline/glutamine rich (polypyrimidine tract binding protein associated) | 3.252 | 0.0073025 |
| 1444952_a_at          | Nucks1         | nuclear casein kinase and cyclin-dependent kinase substrate 1                            | 3.270 | 0.0018313 |
| AFFX-PheX-M_at        | NA             | NA                                                                                       | 3.300 | 0.0358023 |
| AFFX-r2-Bs-phe-M_at   | NA             | NA                                                                                       | 3.311 | 0.0276457 |
| 1457744_at            | Ddx46          | DEAD (Asp-Glu-Ala-Asp) box polypeptide 46                                                | 3.330 | 0.0043166 |
| 1426541_a_at          | Endod1         | endonuclease domain containing 1                                                         | 3.398 | 0.0064998 |
| 1449446_at            | Ccdc59         | coiled-coil domain containing 59                                                         | 3.409 | 0.0025094 |
| 1441466_at            | Sfrs10         | splicing factor, arginine/serine-rich 10 (transformer 2 homolog, Drosophila)             | 3.419 | 0.0118036 |
| AFFX-r2-Bs-phe-5_at   | NA             | NA                                                                                       | 3.484 | 0.0302019 |

|                       |         |                                                                                                   |       |           |
|-----------------------|---------|---------------------------------------------------------------------------------------------------|-------|-----------|
| 1452708_a_at          | Luc7l   | Luc7 homolog (S. cerevisiae)-like                                                                 | 3.495 | 0.0220084 |
| AFFX-ThrX-5_at        | NA      | NA                                                                                                | 3.533 | 0.0267839 |
| 1444004_at            | Thoc2   | THO complex 2                                                                                     | 3.546 | 0.0388227 |
| AFFX-LysX-5_at        | NA      | NA                                                                                                | 3.570 | 0.0204446 |
| 1456319_at            | NA      | NA                                                                                                | 3.585 | 0.0112417 |
| 1430216_at            | Zfp292  | zinc finger protein 292                                                                           | 3.648 | 0.0006681 |
| 1456420_at            | Arid4a  | AT rich interactive domain 4A (RBP1-like)                                                         | 3.657 | 0.0157006 |
| 1436505_at            | Ppig    | peptidyl-prolyl isomerase G (cyclophilin G)                                                       | 3.697 | 0.0122708 |
| AFFX-DapX-5_at        | NA      | NA                                                                                                | 3.703 | 0.0076425 |
| AFFX-r2-Bs-thr-5_s_at | NA      | NA                                                                                                | 3.709 | 0.0200456 |
| 1436746_at            | Wnk1    | WNK lysine deficient protein kinase 1                                                             | 3.791 | 0.0163493 |
| 1415859_at            | Eif3c   | eukaryotic translation initiation factor 3, subunit C                                             | 3.881 | 0.0113674 |
| 1452333_at            | Smarca2 | SWI/SNF related, matrix associated, actin dependent regulator of chromatin, subfamily a, member 2 | 3.932 | 0.000463  |
| AFFX-r2-Bs-lys-5_at   | NA      | NA                                                                                                | 4.020 | 0.0108107 |
| 1458685_at            | Garnl1  | GTPase activating RANGAP domain-like 1                                                            | 4.047 | 0.0172665 |
| AFFX-r2-Bs-dap-5_at   | NA      | NA                                                                                                | 4.055 | 0.0036696 |
| AFFX-PheX-5_at        | NA      | NA                                                                                                | 4.135 | 0.0165357 |



|              |                |                                                                        |       |           |
|--------------|----------------|------------------------------------------------------------------------|-------|-----------|
| 1451920_a_at | Rfc1           | replication factor C (activator 1) 1                                   | 4.148 | 0.0032625 |
| 1434300_at   | 2610101N10 Rik | RIKEN cDNA 2610101N10 gene                                             | 4.161 | 0.0106819 |
| 1456110_at   | Ankrd11        | ankyrin repeat domain 11                                               | 4.349 | 0.0167188 |
| 1443602_at   | NA             | NA                                                                     | 4.372 | 0.0034879 |
| 1431024_a_at | Arid4b         | AT rich interactive domain 4B (RBP1-like)                              | 4.418 | 0.0036213 |
| 1451485_at   | 3300001P08 Rik | RIKEN cDNA 3300001P08 gene                                             | 4.522 | 0.0172686 |
| 1426360_at   | Zc3h11a        | zinc finger CCCH type containing 11A                                   | 4.543 | 0.0017533 |
| 1456102_a_at | Cul5           | cullin 5                                                               | 4.632 | 0.0025593 |
| 1420946_at   | Atrx           | alpha thalassemia/mental retardation syndrome X-linked homolog (human) | 4.756 | 0.0015104 |
| 1452885_at   | Sfrs2ip        | splicing factor, arginine/serine-rich 2, interacting protein           | 4.801 | 0.0054179 |
| 1443867_at   | Ankrd12        | ankyrin repeat domain 12                                               | 5.613 | 0.0004093 |
| 1437082_at   | Akap9          | A kinase (PRKA) anchor protein (yotiao) 9                              | 5.840 | 0.005754  |
| 1443877_a_at | Rapgef6        | Rap guanine nucleotide exchange factor (GEF) 6                         | 6.179 | 0.0017994 |
| 1419734_at   | Actb           | actin, beta                                                            | 7.191 | 0.000917  |
